# Supplementary material
Source: MDPI journal article supplement (https://www.mdpi.com/2077-0472/14/3/503)
Supplement: s1 [file s1]

**Table S1.** Data availability of the selected 27 meteorological stations.

[illegible]

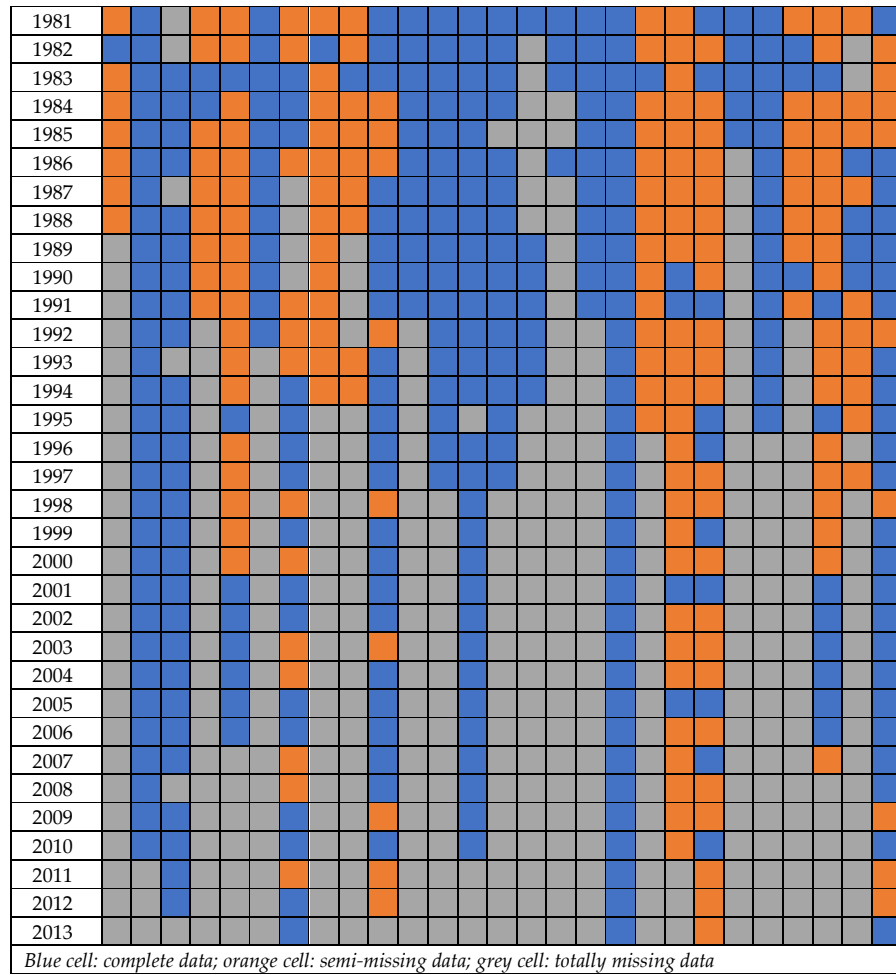

**Table S2.** Ahmetli station Kaplan-Meier survival estimates according to SPI-3

| Kaplan-Meier Wet to Dry (SPI3) |        |         |          |         |              |              |
|--------------------------------|--------|---------|----------|---------|--------------|--------------|
|                                |        | n       | events   | median  | 0.95LCL      | 0.95UCL      |
|                                |        | 44      | 44       | 4.5     | 4            | 8            |
| time                           | n.risk | n.event | survival | std.err | lower 95% CL | upper 95% CL |
| 1                              | 44     | 5       | 0.8864   | 0.0478  | 0.79738      | 0.985        |
| 2                              | 39     | 5       | 0.7727   | 0.0632  | 0.65831      | 0.907        |
| 3                              | 34     | 6       | 0.6364   | 0.0725  | 0.50898      | 0.796        |
| 4                              | 28     | 6       | 0.5      | 0.0754  | 0.37209      | 0.672        |
| 5                              | 22     | 3       | 0.4318   | 0.0747  | 0.30768      | 0.606        |
| 6                              | 19     | 2       | 0.3864   | 0.0734  | 0.26624      | 0.561        |
| 7                              | 17     | 2       | 0.3409   | 0.0715  | 0.22605      | 0.514        |
| 8                              | 15     | 4       | 0.25     | 0.0653  | 0.14986      | 0.417        |
| 9                              | 11     | 2       | 0.2045   | 0.0608  | 0.11422      | 0.366        |
| 10                             | 9      | 2       | 0.1591   | 0.0551  | 0.08065      | 0.314        |
| 14                             | 7      | 1       | 0.1364   | 0.0517  | 0.06483      | 0.287        |
| 15                             | 6      | 1       | 0.1136   | 0.0478  | 0.04979      | 0.259        |
| 17                             | 5      | 1       | 0.0909   | 0.0433  | 0.03571      | 0.231        |

|    |   |   |        |        |         |       |
|----|---|---|--------|--------|---------|-------|
| 18 | 4 | 1 | 0.0682 | 0.038  | 0.02287 | 0.203 |
| 24 | 3 | 1 | 0.0455 | 0.0314 | 0.01174 | 0.176 |
| 25 | 2 | 1 | 0.0227 | 0.0225 | 0.00327 | 0.158 |
| 27 | 1 | 1 | 0      | NaN    | NA      | NA    |

**Table S3.** Ahmetli station Kaplan-Meier survival estimates according to SPI-6

| Kaplan-Meier Wet to Dry (SPI6) |        |         |          |         |              |              |
|--------------------------------|--------|---------|----------|---------|--------------|--------------|
|                                |        | n       | events   | median  | 0.95LCL      | 0.95UCL      |
|                                |        | 40      | 40       | 8.5     | 7            | 23           |
| time                           | n.risk | n.event | survival | std.err | lower 95% CL | upper 95% CL |
| 1                              | 40     | 3       | 0.925    | 0.0416  | 0.84687      | 1            |
| 2                              | 37     | 6       | 0.775    | 0.066   | 0.65582      | 0.916        |
| 3                              | 31     | 3       | 0.7      | 0.0725  | 0.57147      | 0.857        |
| 6                              | 28     | 2       | 0.65     | 0.0754  | 0.51779      | 0.816        |
| 7                              | 26     | 3       | 0.575    | 0.0782  | 0.44051      | 0.751        |
| 8                              | 23     | 3       | 0.5      | 0.0791  | 0.36676      | 0.682        |
| 9                              | 20     | 3       | 0.425    | 0.0782  | 0.29638      | 0.609        |
| 10                             | 17     | 1       | 0.4      | 0.0775  | 0.27367      | 0.585        |
| 11                             | 16     | 1       | 0.375    | 0.0765  | 0.25135      | 0.559        |
| 19                             | 15     | 1       | 0.35     | 0.0754  | 0.22943      | 0.534        |
| 23                             | 14     | 2       | 0.3      | 0.0725  | 0.18687      | 0.482        |
| 24                             | 12     | 1       | 0.275    | 0.0706  | 0.16627      | 0.455        |
| 25                             | 11     | 1       | 0.25     | 0.0685  | 0.14616      | 0.428        |
| 28                             | 10     | 1       | 0.225    | 0.066   | 0.12659      | 0.4          |
| 30                             | 9      | 1       | 0.2      | 0.0632  | 0.10761      | 0.372        |
| 36                             | 8      | 1       | 0.175    | 0.0601  | 0.08929      | 0.343        |
| 37                             | 7      | 1       | 0.15     | 0.0565  | 0.07173      | 0.314        |
| 38                             | 6      | 1       | 0.125    | 0.0523  | 0.05506      | 0.284        |
| 39                             | 5      | 1       | 0.1      | 0.0474  | 0.03947      | 0.253        |
| 40                             | 4      | 1       | 0.075    | 0.0416  | 0.02526      | 0.223        |
| 41                             | 3      | 1       | 0.05     | 0.0345  | 0.01295      | 0.193        |
| 42                             | 2      | 1       | 0.025    | 0.0247  | 0.00361      | 0.173        |
| 43                             | 1      | 1       | 0        | NaN     | NA           | NA           |

**Table S4.** Ahmetli station Kaplan-Meier survival estimates according to SPI-12

| Kaplan-Meier Wet to Dry (SPI12) |        |         |          |         |              |              |
|---------------------------------|--------|---------|----------|---------|--------------|--------------|
|                                 |        | n       | events   | median  | 0.95LCL      | 0.95UCL      |
|                                 |        | 26      | 26       | 64.5    | 14           | 70           |
| time                            | n.risk | n.event | survival | std.err | lower 95% CL | upper 95% CL |
| 2                               | 26     | 1       | 0.9615   | 0.0377  | 0.89039      | 1            |
| 3                               | 25     | 1       | 0.9231   | 0.0523  | 0.82613      | 1            |
| 9                               | 24     | 2       | 0.8462   | 0.0708  | 0.71824      | 0.997        |
| 10                              | 22     | 1       | 0.8077   | 0.0773  | 0.66956      | 0.974        |

|    |    |   |        |        |         |       |
|----|----|---|--------|--------|---------|-------|
| 11 | 21 | 1 | 0.7692 | 0.0826 | 0.62319 | 0.949 |
| 12 | 20 | 1 | 0.7308 | 0.087  | 0.5787  | 0.923 |
| 13 | 19 | 1 | 0.6923 | 0.0905 | 0.53581 | 0.895 |
| 14 | 18 | 1 | 0.6538 | 0.0933 | 0.49433 | 0.865 |
| 15 | 17 | 1 | 0.6154 | 0.0954 | 0.45412 | 0.834 |
| 16 | 16 | 1 | 0.5769 | 0.0969 | 0.41511 | 0.802 |
| 63 | 15 | 1 | 0.5385 | 0.0978 | 0.37723 | 0.769 |
| 64 | 14 | 1 | 0.5    | 0.0981 | 0.34044 | 0.734 |
| 65 | 13 | 1 | 0.4615 | 0.0978 | 0.30472 | 0.699 |
| 66 | 12 | 1 | 0.4231 | 0.0969 | 0.27007 | 0.663 |
| 67 | 11 | 1 | 0.3846 | 0.0954 | 0.23652 | 0.625 |
| 68 | 10 | 1 | 0.3462 | 0.0933 | 0.2041  | 0.587 |
| 69 | 9  | 1 | 0.3077 | 0.0905 | 0.17287 | 0.548 |
| 70 | 8  | 2 | 0.2308 | 0.0826 | 0.11439 | 0.466 |
| 71 | 6  | 1 | 0.1923 | 0.0773 | 0.08747 | 0.423 |
| 72 | 5  | 1 | 0.1538 | 0.0708 | 0.06246 | 0.379 |
| 73 | 4  | 1 | 0.1154 | 0.0627 | 0.0398  | 0.334 |
| 74 | 3  | 1 | 0.0769 | 0.0523 | 0.02031 | 0.291 |
| 82 | 2  | 1 | 0.0385 | 0.0377 | 0.00563 | 0.263 |
| 83 | 1  | 1 | 0      | NaN    | NA      | NA    |

**Table S5.** Ahmetli station Kaplan-Meier drought risk estimates according to SPI-3, 6, and 12

| Drought Risk (SPI3) |              | Drought Risk (SPI6) |              | Drought Risk (SPI12) |              |
|---------------------|--------------|---------------------|--------------|----------------------|--------------|
| Time                | Drought Risk | Time                | Drought Risk | Time                 | Drought Risk |
| 1                   | 0.1136       | 1                   | 0.075        | 2                    | 0.0385       |
| 2                   | 0.2273       | 2                   | 0.225        | 3                    | 0.0769       |
| 3                   | 0.3636       | 3                   | 0.3          | 6                    | 0.11535      |
| 4                   | 0.5          | 6                   | 0.35         | 9                    | 0.1538       |
| 5                   | 0.5682       | 7                   | 0.425        | 10                   | 0.1923       |
| 6                   | 0.6136       | 8                   | 0.5          | 11                   | 0.2308       |
| 7                   | 0.6591       | 9                   | 0.575        | 12                   | 0.2692       |
| 8                   | 0.75         | 10                  | 0.6          | 13                   | 0.3077       |
| 9                   | 0.7955       | 11                  | 0.625        | 14                   | 0.3462       |
| 10                  | 0.8409       | 12                  | 0.628125     | 15                   | 0.3846       |
| 11                  | 0.846575     | 19                  | 0.65         | 16                   | 0.4231       |
| 12                  | 0.85225      | 23                  | 0.7          | 63                   | 0.4615       |
| 14                  | 0.8636       | 24                  | 0.725        | 64                   | 0.5          |
| 15                  | 0.8864       | 25                  | 0.75         | 65                   | 0.5385       |
| 17                  | 0.9091       | 28                  | 0.775        | 66                   | 0.5769       |

|    |        |    |       |    |        |
|----|--------|----|-------|----|--------|
| 18 | 0.9318 | 30 | 0.8   | 67 | 0.6154 |
| 24 | 0.9545 | 36 | 0.825 | 68 | 0.6538 |
| 25 | 0.9773 | 37 | 0.85  | 69 | 0.6923 |
| 27 | 1      | 38 | 0.875 | 70 | 0.7692 |
|    |        | 39 | 0.9   | 71 | 0.8077 |
|    |        | 40 | 0.925 | 72 | 0.8462 |
|    |        | 41 | 0.95  | 73 | 0.8846 |
|    |        | 42 | 0.975 | 74 | 0.9231 |
|    |        | 43 | 1     | 82 | 0.9615 |
|    |        |    |       | 83 | 1      |

**Table S6.** Ahmetli station Kaplan-Meier survival estimates according to SPEI-3

| Kaplan-Meier Wet to Dry (SPEI3) |        |         |          |         |              |              |
|---------------------------------|--------|---------|----------|---------|--------------|--------------|
|                                 |        | n       | events   | median  | 0.95LCL      | 0.95UCL      |
|                                 |        | 47      | 47       | 8       | 5            | 10           |
| time                            | n.risk | n.event | survival | std.err | lower 95% CI | upper 95% CI |
| 1                               | 47     | 5       | 0.8936   | 0.045   | 0.80968      | 0.986        |
| 2                               | 42     | 3       | 0.8298   | 0.0548  | 0.72901      | 0.944        |
| 3                               | 39     | 4       | 0.7447   | 0.0636  | 0.6299       | 0.88         |
| 4                               | 35     | 5       | 0.6383   | 0.0701  | 0.51471      | 0.792        |
| 5                               | 30     | 3       | 0.5745   | 0.0721  | 0.44916      | 0.735        |
| 6                               | 27     | 1       | 0.5532   | 0.0725  | 0.42785      | 0.715        |
| 7                               | 26     | 2       | 0.5106   | 0.0729  | 0.38598      | 0.676        |
| 8                               | 24     | 3       | 0.4468   | 0.0725  | 0.32506      | 0.614        |
| 9                               | 21     | 3       | 0.383    | 0.0709  | 0.26643      | 0.551        |
| 10                              | 18     | 4       | 0.2979   | 0.0667  | 0.19205      | 0.462        |
| 11                              | 14     | 1       | 0.2766   | 0.0652  | 0.1742       | 0.439        |
| 12                              | 13     | 2       | 0.234    | 0.0618  | 0.13953      | 0.393        |
| 13                              | 11     | 1       | 0.2128   | 0.0597  | 0.12277      | 0.369        |
| 14                              | 10     | 1       | 0.1915   | 0.0574  | 0.10642      | 0.345        |
| 15                              | 9      | 1       | 0.1702   | 0.0548  | 0.09054      | 0.32         |
| 16                              | 8      | 1       | 0.1489   | 0.0519  | 0.0752       | 0.295        |
| 17                              | 7      | 2       | 0.1064   | 0.045   | 0.04645      | 0.244        |
| 18                              | 5      | 1       | 0.0851   | 0.0407  | 0.03333      | 0.217        |
| 25                              | 4      | 2       | 0.0426   | 0.0294  | 0.01096      | 0.165        |
| 26                              | 2      | 1       | 0.0213   | 0.021   | 0.00306      | 0.148        |
| 27                              | 1      | 1       | 0        | NaN     | NA           | NA           |

**Table S7.** Ahmetli station Kaplan-Meier survival estimates according to SPEI-6

| Kaplan-Meier Wet to Dry (SPEI6) |  |    |        |        |         |         |
|---------------------------------|--|----|--------|--------|---------|---------|
|                                 |  | n  | events | median | 0.95LCL | 0.95UCL |
|                                 |  | 45 | 45     | 18     | 6       | 26      |

| time | n.risk | n.event | survival | std.err | lower 95%<br>CI | upper 95% CI |
|------|--------|---------|----------|---------|-----------------|--------------|
| 1    | 45     | 4       | 0.9111   | 0.0424  | 0.8316          | 0.998        |
| 2    | 41     | 4       | 0.8222   | 0.057   | 0.7178          | 0.942        |
| 3    | 37     | 2       | 0.7778   | 0.062   | 0.6653          | 0.909        |
| 4    | 35     | 1       | 0.7556   | 0.0641  | 0.6399          | 0.892        |
| 5    | 34     | 2       | 0.7111   | 0.0676  | 0.5903          | 0.857        |
| 6    | 32     | 4       | 0.6222   | 0.0723  | 0.4955          | 0.781        |
| 7    | 28     | 1       | 0.6      | 0.073   | 0.4727          | 0.762        |
| 9    | 27     | 1       | 0.5778   | 0.0736  | 0.4501          | 0.742        |
| 14   | 26     | 1       | 0.5556   | 0.0741  | 0.4278          | 0.721        |
| 17   | 25     | 1       | 0.5333   | 0.0744  | 0.4058          | 0.701        |
| 18   | 24     | 2       | 0.4889   | 0.0745  | 0.3626          | 0.659        |
| 19   | 22     | 1       | 0.4667   | 0.0744  | 0.3415          | 0.638        |
| 20   | 21     | 1       | 0.4444   | 0.0741  | 0.3206          | 0.616        |
| 21   | 20     | 1       | 0.4222   | 0.0736  | 0.3             | 0.594        |
| 22   | 19     | 1       | 0.4      | 0.073   | 0.2797          | 0.572        |
| 23   | 18     | 1       | 0.3778   | 0.0723  | 0.2597          | 0.55         |
| 24   | 17     | 1       | 0.3556   | 0.0714  | 0.2399          | 0.527        |
| 25   | 16     | 1       | 0.3333   | 0.0703  | 0.2205          | 0.504        |
| 26   | 15     | 1       | 0.3111   | 0.069   | 0.2014          | 0.481        |
| 27   | 14     | 1       | 0.2889   | 0.0676  | 0.1827          | 0.457        |
| 28   | 13     | 1       | 0.2667   | 0.0659  | 0.1643          | 0.433        |
| 29   | 12     | 2       | 0.2222   | 0.062   | 0.1286          | 0.384        |
| 30   | 10     | 1       | 0.2      | 0.0596  | 0.1115          | 0.359        |
| 31   | 9      | 1       | 0.1778   | 0.057   | 0.0948          | 0.333        |
| 32   | 8      | 1       | 0.1556   | 0.054   | 0.0787          | 0.307        |
| 38   | 7      | 1       | 0.1333   | 0.0507  | 0.0633          | 0.281        |
| 39   | 6      | 1       | 0.1111   | 0.0468  | 0.0486          | 0.254        |
| 40   | 5      | 1       | 0.0889   | 0.0424  | 0.0349          | 0.227        |
| 41   | 4      | 1       | 0.0667   | 0.0372  | 0.0223          | 0.199        |
| 42   | 3      | 1       | 0.0444   | 0.0307  | 0.0115          | 0.172        |
| 43   | 2      | 1       | 0.0222   | 0.022   | 0.0032          | 0.154        |
| 62   | 1      | 1       | 0        | NaN     | NA              | NA           |

**Table S8.** Ahmetli station Kaplan-Meier survival estimates according to SPEI-12

| Kaplan-Meier Wet to Dry (SPEI12) |        |         |          |         |                 |                 |
|----------------------------------|--------|---------|----------|---------|-----------------|-----------------|
|                                  |        | n       | events   | median  | 0.95LCL         | 0.95UCL         |
|                                  |        | 42      | 42       | 34.5    | 8               | 64              |
| time                             | n.risk | n.event | survival | std.err | lower 95%<br>CI | upper 95%<br>CI |
| 2                                | 42     | 3       | 0.9286   | 0.0397  | 0.85386         | 1.000           |
| 3                                | 39     | 4       | 0.8333   | 0.0575  | 0.72791         | 0.954           |
| 4                                | 35     | 2       | 0.7857   | 0.0633  | 0.67092         | 0.92            |

|    |    |   |        |        |         |       |
|----|----|---|--------|--------|---------|-------|
| 5  | 33 | 2 | 0.7381 | 0.0678 | 0.61642 | 0.884 |
| 6  | 31 | 3 | 0.6667 | 0.0727 | 0.53831 | 0.826 |
| 7  | 28 | 1 | 0.6429 | 0.0739 | 0.51312 | 0.805 |
| 8  | 27 | 1 | 0.619  | 0.0749 | 0.4883  | 0.785 |
| 24 | 26 | 1 | 0.5952 | 0.0757 | 0.46386 | 0.764 |
| 25 | 25 | 1 | 0.5714 | 0.0764 | 0.43976 | 0.743 |
| 26 | 24 | 1 | 0.5476 | 0.0768 | 0.41601 | 0.721 |
| 27 | 23 | 1 | 0.5238 | 0.0771 | 0.39259 | 0.699 |
| 28 | 22 | 1 | 0.5    | 0.0772 | 0.36951 | 0.677 |
| 41 | 21 | 1 | 0.4762 | 0.0771 | 0.34676 | 0.654 |
| 42 | 20 | 1 | 0.4524 | 0.0768 | 0.32434 | 0.631 |
| 43 | 19 | 1 | 0.4286 | 0.0764 | 0.30225 | 0.608 |
| 60 | 18 | 1 | 0.4048 | 0.0757 | 0.28049 | 0.584 |
| 61 | 17 | 1 | 0.381  | 0.0749 | 0.25908 | 0.56  |
| 62 | 16 | 1 | 0.3571 | 0.0739 | 0.23803 | 0.536 |
| 63 | 15 | 1 | 0.3333 | 0.0727 | 0.21734 | 0.511 |
| 64 | 14 | 1 | 0.3095 | 0.0713 | 0.19703 | 0.486 |
| 65 | 13 | 1 | 0.2857 | 0.0697 | 0.17712 | 0.461 |
| 66 | 12 | 1 | 0.2619 | 0.0678 | 0.15763 | 0.435 |
| 67 | 11 | 1 | 0.2381 | 0.0657 | 0.13861 | 0.409 |
| 68 | 10 | 1 | 0.2143 | 0.0633 | 0.12009 | 0.382 |
| 69 | 9  | 1 | 0.1905 | 0.0606 | 0.10211 | 0.355 |
| 70 | 8  | 1 | 0.1667 | 0.0575 | 0.08475 | 0.328 |
| 71 | 7  | 1 | 0.1429 | 0.054  | 0.0681  | 0.3   |
| 72 | 6  | 2 | 0.0952 | 0.0453 | 0.0375  | 0.242 |
| 73 | 4  | 1 | 0.0714 | 0.0397 | 0.02401 | 0.213 |
| 74 | 3  | 1 | 0.0476 | 0.0329 | 0.01231 | 0.184 |
| 75 | 2  | 1 | 0.0238 | 0.0235 | 0.00343 | 0.165 |
| 76 | 1  | 1 | 0      | NaN    | NA      | NA    |

**Table S9.** Ahmetli station Kaplan-Meier drought risk estimates according to SPEI-3, 6, and 12

| Drought Risk (SPEI3) |              | Drought Risk (SPEI6) |              | Drought Risk (SPEI12) |              |
|----------------------|--------------|----------------------|--------------|-----------------------|--------------|
| Time                 | Drought Risk | Time                 | Drought Risk | Time                  | Drought Risk |
| 1                    | 0.1064       | 1                    | 0.0889       | 2                     | 0.0714       |
| 2                    | 0.1702       | 2                    | 0.1778       | 3                     | 0.1667       |
| 3                    | 0.2553       | 3                    | 0.2222       | 4                     | 0.2143       |
| 4                    | 0.3617       | 4                    | 0.2444       | 5                     | 0.2619       |
| 5                    | 0.4255       | 5                    | 0.2889       | 6                     | 0.3333       |
| 6                    | 0.4468       | 6                    | 0.3778       | 7                     | 0.3571       |
| 7                    | 0.4894       | 7                    | 0.4          | 8                     | 0.381        |
| 8                    | 0.5532       | 9                    | 0.4222       | 12                    | 0.38695      |
| 9                    | 0.617        | 12                   | 0.43552      | 24                    | 0.4048       |
| 10                   | 0.7021       | 14                   | 0.4444       | 25                    | 0.4286       |

|    |        |    |        |    |        |
|----|--------|----|--------|----|--------|
| 11 | 0.7234 | 17 | 0.4667 | 26 | 0.4524 |
| 12 | 0.766  | 18 | 0.5111 | 27 | 0.4762 |
| 13 | 0.7872 | 19 | 0.5333 | 28 | 0.5    |
| 14 | 0.8085 | 20 | 0.5556 | 41 | 0.5238 |
| 15 | 0.8298 | 21 | 0.5778 | 42 | 0.5476 |
| 16 | 0.8511 | 22 | 0.6    | 43 | 0.5714 |
| 17 | 0.8936 | 23 | 0.6222 | 60 | 0.5952 |
| 18 | 0.9149 | 24 | 0.6444 | 61 | 0.619  |
| 25 | 0.9574 | 25 | 0.6667 | 62 | 0.6429 |
| 26 | 0.9787 | 26 | 0.6889 | 63 | 0.6667 |
| 27 | 1      | 27 | 0.7111 | 64 | 0.6905 |
|    |        | 28 | 0.7333 | 65 | 0.7143 |
|    |        | 29 | 0.7778 | 66 | 0.7381 |
|    |        | 30 | 0.8    | 67 | 0.7619 |
|    |        | 31 | 0.8222 | 68 | 0.7857 |
|    |        | 32 | 0.8444 | 69 | 0.8095 |
|    |        | 38 | 0.8667 | 70 | 0.8333 |
|    |        | 39 | 0.8889 | 71 | 0.8571 |
|    |        | 40 | 0.9111 | 72 | 0.9048 |
|    |        | 41 | 0.9333 | 73 | 0.9286 |
|    |        | 42 | 0.9556 | 74 | 0.9524 |
|    |        | 43 | 0.9778 | 75 | 0.9762 |
|    |        | 62 | 1      | 76 | 1      |

**Table S10.** Akhisar station Kaplan-Meier survival estimates according to SPI-3

| Kaplan-Meier Wet to Dry (SPI3) |        |         |          |         |              |              |
|--------------------------------|--------|---------|----------|---------|--------------|--------------|
|                                |        | n       | events   | median  | 0.95LCL      | 0.95UCL      |
|                                |        | 143     | 143      | 10      | 8            | 12           |
| time                           | n.risk | n.event | survival | std.err | lower 95% CL | upper 95% CL |
| 1                              | 143    | 6       | 0.95804  | 0.01677 | 0.925738     | 0.9915       |
| 2                              | 137    | 6       | 0.91608  | 0.02319 | 0.871749     | 0.9627       |
| 3                              | 131    | 10      | 0.84615  | 0.03017 | 0.789037     | 0.9074       |
| 4                              | 121    | 12      | 0.76224  | 0.0356  | 0.695562     | 0.8353       |
| 5                              | 109    | 9       | 0.6993   | 0.03835 | 0.62804      | 0.7786       |
| 6                              | 100    | 5       | 0.66434  | 0.03949 | 0.591277     | 0.7464       |
| 7                              | 95     | 12      | 0.58042  | 0.04127 | 0.504919     | 0.6672       |



|    |    |   |         |         |          |        |
|----|----|---|---------|---------|----------|--------|
| 8  | 83 | 5 | 0.54545 | 0.04164 | 0.469656 | 0.6335 |
| 9  | 78 | 6 | 0.5035  | 0.04181 | 0.42787  | 0.5925 |
| 10 | 72 | 8 | 0.44755 | 0.04158 | 0.373044 | 0.5369 |
| 11 | 64 | 5 | 0.41259 | 0.04117 | 0.339299 | 0.5017 |
| 12 | 59 | 6 | 0.37063 | 0.04039 | 0.299352 | 0.4589 |
| 13 | 53 | 5 | 0.33566 | 0.03949 | 0.266542 | 0.4227 |
| 14 | 48 | 1 | 0.32867 | 0.03928 | 0.260035 | 0.4154 |
| 15 | 47 | 5 | 0.29371 | 0.03809 | 0.227788 | 0.3787 |
| 16 | 42 | 5 | 0.25874 | 0.03662 | 0.196058 | 0.3415 |
| 17 | 37 | 6 | 0.21678 | 0.03446 | 0.158755 | 0.296  |
| 18 | 31 | 6 | 0.17483 | 0.03176 | 0.12245  | 0.2496 |
| 19 | 25 | 1 | 0.16783 | 0.03125 | 0.116513 | 0.2418 |
| 20 | 24 | 1 | 0.16084 | 0.03072 | 0.110612 | 0.2339 |
| 21 | 23 | 2 | 0.14685 | 0.0296  | 0.098927 | 0.218  |
| 22 | 21 | 2 | 0.13287 | 0.02838 | 0.087413 | 0.202  |
| 23 | 19 | 2 | 0.11888 | 0.02706 | 0.07609  | 0.1857 |
| 24 | 17 | 3 | 0.0979  | 0.02485 | 0.059528 | 0.161  |
| 25 | 14 | 2 | 0.08392 | 0.02319 | 0.048827 | 0.1442 |
| 26 | 12 | 3 | 0.06294 | 0.02031 | 0.033438 | 0.1185 |
| 27 | 9  | 2 | 0.04895 | 0.01804 | 0.023769 | 0.1008 |
| 33 | 7  | 1 | 0.04196 | 0.01677 | 0.019173 | 0.0918 |
| 34 | 6  | 1 | 0.03497 | 0.01536 | 0.01478  | 0.0827 |
| 35 | 5  | 1 | 0.02797 | 0.01379 | 0.010644 | 0.0735 |
| 43 | 4  | 1 | 0.02098 | 0.01198 | 0.006847 | 0.0643 |
| 44 | 3  | 1 | 0.01399 | 0.00982 | 0.003532 | 0.0554 |
| 45 | 2  | 1 | 0.00699 | 0.00697 | 0.000992 | 0.0493 |
| 46 | 1  | 1 | 0       | NaN     | NA       | NA     |

**Table S11.** Akhisar station Kaplan-Meier survival estimates according to SPI-6

| Kaplan-Meier Wet to Dry (SPI6) |        |         |          |         |                 |                 |
|--------------------------------|--------|---------|----------|---------|-----------------|-----------------|
|                                |        | n       | events   | median  | 0.95LCL         | 0.95UCL         |
|                                |        | 145     | 145      | 15      | 12              | 17              |
| time                           | n.risk | n.event | survival | std.err | lower 95%<br>CL | upper 95%<br>CL |
| 1                              | 145    | 12      | 0.9172   | 0.02288 | 0.873475        | 0.9632          |
| 2                              | 133    | 9       | 0.8552   | 0.02923 | 0.799767        | 0.9144          |
| 3                              | 124    | 5       | 0.8207   | 0.03186 | 0.760567        | 0.8856          |
| 4                              | 119    | 7       | 0.7724   | 0.03482 | 0.707098        | 0.8438          |
| 5                              | 112    | 4       | 0.7448   | 0.0362  | 0.677144        | 0.8193          |
| 6                              | 108    | 4       | 0.7172   | 0.0374  | 0.647562        | 0.7944          |

|    |     |   |        |         |          |        |
|----|-----|---|--------|---------|----------|--------|
| 7  | 104 | 3 | 0.6966 | 0.03818 | 0.6256   | 0.7756 |
| 8  | 101 | 4 | 0.669  | 0.03908 | 0.596592 | 0.7501 |
| 9  | 97  | 4 | 0.6414 | 0.03983 | 0.567881 | 0.7244 |
| 10 | 93  | 4 | 0.6138 | 0.04043 | 0.539448 | 0.6984 |
| 11 | 89  | 3 | 0.5931 | 0.0408  | 0.518299 | 0.6787 |
| 12 | 86  | 4 | 0.5655 | 0.04116 | 0.490327 | 0.6522 |
| 13 | 82  | 5 | 0.531  | 0.04144 | 0.455715 | 0.6188 |
| 14 | 77  | 4 | 0.5034 | 0.04152 | 0.428304 | 0.5918 |
| 15 | 73  | 5 | 0.469  | 0.04144 | 0.394385 | 0.5577 |
| 16 | 68  | 4 | 0.4414 | 0.04124 | 0.367525 | 0.5301 |
| 17 | 64  | 6 | 0.4    | 0.04068 | 0.327706 | 0.4882 |
| 18 | 58  | 6 | 0.3586 | 0.03983 | 0.28847  | 0.4458 |
| 19 | 52  | 3 | 0.3379 | 0.03928 | 0.269082 | 0.4244 |
| 20 | 49  | 3 | 0.3172 | 0.03865 | 0.249855 | 0.4028 |
| 21 | 46  | 2 | 0.3034 | 0.03818 | 0.23713  | 0.3883 |
| 22 | 44  | 2 | 0.2897 | 0.03767 | 0.224483 | 0.3737 |
| 23 | 42  | 3 | 0.269  | 0.03682 | 0.205664 | 0.3518 |
| 24 | 39  | 2 | 0.2552 | 0.0362  | 0.193225 | 0.337  |
| 25 | 37  | 2 | 0.2414 | 0.03554 | 0.180877 | 0.3221 |
| 26 | 35  | 3 | 0.2207 | 0.03444 | 0.162535 | 0.2997 |
| 27 | 32  | 2 | 0.2069 | 0.03364 | 0.150436 | 0.2845 |
| 28 | 30  | 2 | 0.1931 | 0.03278 | 0.13845  | 0.2693 |
| 29 | 28  | 3 | 0.1724 | 0.03137 | 0.120698 | 0.2463 |
| 30 | 25  | 2 | 0.1586 | 0.03034 | 0.109033 | 0.2308 |
| 31 | 23  | 2 | 0.1448 | 0.02923 | 0.097517 | 0.2151 |
| 32 | 21  | 1 | 0.1379 | 0.02864 | 0.091821 | 0.2072 |
| 33 | 20  | 1 | 0.131  | 0.02802 | 0.086169 | 0.1993 |
| 34 | 19  | 1 | 0.1241 | 0.02738 | 0.080564 | 0.1913 |
| 35 | 18  | 2 | 0.1103 | 0.02602 | 0.069508 | 0.1752 |
| 36 | 16  | 2 | 0.0966 | 0.02453 | 0.058685 | 0.1589 |
| 37 | 14  | 2 | 0.0828 | 0.02288 | 0.048137 | 0.1423 |
| 38 | 12  | 3 | 0.0621 | 0.02004 | 0.032968 | 0.1169 |
| 39 | 9   | 1 | 0.0552 | 0.01896 | 0.028132 | 0.1082 |
| 40 | 8   | 2 | 0.0414 | 0.01654 | 0.018904 | 0.0906 |
| 44 | 6   | 1 | 0.0345 | 0.01515 | 0.014573 | 0.0816 |
| 45 | 5   | 1 | 0.0276 | 0.0136  | 0.010495 | 0.0725 |
| 46 | 4   | 1 | 0.0207 | 0.01182 | 0.006752 | 0.0634 |
| 47 | 3   | 1 | 0.0138 | 0.00969 | 0.003483 | 0.0546 |
| 48 | 2   | 1 | 0.0069 | 0.00687 | 0.000978 | 0.0486 |
| 77 | 1   | 1 | 0      | NaN     | NA       | NA     |

**Table S12.** Akhisar station Kaplan-Meier survival estimates according to SPI-12

| Kaplan-Meier Wet to Dry (SPI3) |  |   |        |        |         |         |
|--------------------------------|--|---|--------|--------|---------|---------|
|                                |  | n | events | median | 0.95LCL | 0.95UCL |

|      |        | 156     | 156      | 22      | 18              | 25              |
|------|--------|---------|----------|---------|-----------------|-----------------|
| time | n.risk | n.event | survival | std.err | lower 95%<br>CL | upper 95%<br>CL |
| 1    | 156    | 7       | 0.95513  | 0.01658 | 0.923188        | 0.9882          |
| 2    | 149    | 9       | 0.89744  | 0.02429 | 0.851068        | 0.9463          |
| 3    | 140    | 6       | 0.85897  | 0.02787 | 0.806058        | 0.9154          |
| 4    | 134    | 5       | 0.82692  | 0.03029 | 0.769638        | 0.8885          |
| 5    | 129    | 4       | 0.80128  | 0.03195 | 0.741049        | 0.8664          |
| 6    | 125    | 3       | 0.78205  | 0.03305 | 0.719876        | 0.8496          |
| 7    | 122    | 3       | 0.76282  | 0.03406 | 0.69891         | 0.8326          |
| 8    | 119    | 5       | 0.73077  | 0.03551 | 0.664377        | 0.8038          |
| 9    | 114    | 4       | 0.70513  | 0.03651 | 0.637085        | 0.7804          |
| 10   | 110    | 1       | 0.69872  | 0.03673 | 0.630305        | 0.7746          |
| 11   | 109    | 2       | 0.6859   | 0.03716 | 0.616795        | 0.7627          |
| 12   | 107    | 2       | 0.67308  | 0.03756 | 0.603349        | 0.7509          |
| 13   | 105    | 3       | 0.65385  | 0.03809 | 0.583296        | 0.7329          |
| 14   | 102    | 2       | 0.64103  | 0.03841 | 0.570002        | 0.7209          |
| 15   | 100    | 4       | 0.61538  | 0.03895 | 0.543587        | 0.6967          |
| 16   | 96     | 3       | 0.59615  | 0.03928 | 0.523922        | 0.6783          |
| 17   | 93     | 3       | 0.57692  | 0.03956 | 0.504379        | 0.6599          |
| 18   | 90     | 3       | 0.55769  | 0.03976 | 0.484956        | 0.6413          |
| 19   | 87     | 3       | 0.53846  | 0.03991 | 0.46565         | 0.6227          |
| 20   | 84     | 2       | 0.52564  | 0.03998 | 0.452844        | 0.6101          |
| 21   | 82     | 2       | 0.51282  | 0.04002 | 0.440089        | 0.5976          |
| 22   | 80     | 4       | 0.48718  | 0.04002 | 0.414732        | 0.5723          |
| 23   | 76     | 4       | 0.46154  | 0.03991 | 0.38958         | 0.5468          |
| 24   | 72     | 4       | 0.4359   | 0.0397  | 0.364634        | 0.5211          |
| 25   | 68     | 5       | 0.40385  | 0.03928 | 0.333744        | 0.4887          |
| 26   | 63     | 1       | 0.39744  | 0.03918 | 0.327606        | 0.4821          |
| 27   | 62     | 3       | 0.37821  | 0.03883 | 0.309274        | 0.4625          |
| 28   | 59     | 1       | 0.37179  | 0.03869 | 0.303191        | 0.4559          |
| 29   | 58     | 1       | 0.36538  | 0.03855 | 0.297122        | 0.4493          |
| 30   | 57     | 1       | 0.35897  | 0.03841 | 0.291067        | 0.4427          |
| 31   | 56     | 1       | 0.35256  | 0.03825 | 0.285027        | 0.4361          |
| 32   | 55     | 1       | 0.34615  | 0.03809 | 0.279001        | 0.4295          |
| 33   | 54     | 1       | 0.33974  | 0.03792 | 0.272989        | 0.4228          |
| 34   | 53     | 1       | 0.33333  | 0.03774 | 0.266993        | 0.4162          |
| 35   | 52     | 2       | 0.32051  | 0.03736 | 0.255045        | 0.4028          |
| 36   | 50     | 2       | 0.30769  | 0.03695 | 0.243159        | 0.3894          |
| 37   | 48     | 2       | 0.29487  | 0.03651 | 0.231338        | 0.3759          |
| 38   | 46     | 3       | 0.27564  | 0.03578 | 0.21373         | 0.3555          |
| 39   | 43     | 2       | 0.26282  | 0.03524 | 0.202079        | 0.3418          |
| 40   | 41     | 2       | 0.25     | 0.03467 | 0.190502        | 0.3281          |
| 41   | 39     | 2       | 0.23718  | 0.03406 | 0.179002        | 0.3143          |
| 42   | 37     | 2       | 0.22436  | 0.0334  | 0.167582        | 0.3004          |

|     |    |   |         |         |          |        |
|-----|----|---|---------|---------|----------|--------|
| 43  | 35 | 2 | 0.21154 | 0.0327  | 0.156249 | 0.2864 |
| 44  | 33 | 2 | 0.19872 | 0.03195 | 0.145006 | 0.2723 |
| 45  | 31 | 2 | 0.1859  | 0.03115 | 0.133862 | 0.2582 |
| 46  | 29 | 2 | 0.17308 | 0.03029 | 0.122822 | 0.2439 |
| 47  | 27 | 1 | 0.16667 | 0.02984 | 0.117344 | 0.2367 |
| 71  | 26 | 1 | 0.16026 | 0.02937 | 0.111895 | 0.2295 |
| 72  | 25 | 2 | 0.14744 | 0.02839 | 0.101093 | 0.215  |
| 73  | 23 | 2 | 0.13462 | 0.02733 | 0.090428 | 0.2004 |
| 74  | 21 | 2 | 0.12179 | 0.02618 | 0.079915 | 0.1856 |
| 75  | 19 | 2 | 0.10897 | 0.02495 | 0.069575 | 0.1707 |
| 76  | 17 | 2 | 0.09615 | 0.0236  | 0.059432 | 0.1556 |
| 77  | 15 | 2 | 0.08333 | 0.02213 | 0.049521 | 0.1402 |
| 78  | 13 | 2 | 0.07051 | 0.0205  | 0.039887 | 0.1247 |
| 79  | 11 | 2 | 0.05769 | 0.01867 | 0.030598 | 0.1088 |
| 80  | 9  | 2 | 0.04487 | 0.01658 | 0.021755 | 0.0926 |
| 81  | 7  | 2 | 0.03205 | 0.0141  | 0.013531 | 0.0759 |
| 82  | 5  | 1 | 0.02564 | 0.01266 | 0.009746 | 0.0675 |
| 83  | 4  | 1 | 0.01923 | 0.011   | 0.006271 | 0.059  |
| 84  | 3  | 1 | 0.01282 | 0.00901 | 0.003235 | 0.0508 |
| 98  | 2  | 1 | 0.00641 | 0.00639 | 0.000909 | 0.0452 |
| 118 | 1  | 1 | 0       | NaN     | NA       | NA     |

**Table S13.** Akhisar station Kaplan-Meier drought risk estimates according to SPI-3, 6, and 12

| Drought Risk (SPI3) |              | Drought Risk (SPI6) |              | Drought Risk (SPI12) |              |
|---------------------|--------------|---------------------|--------------|----------------------|--------------|
| Time                | Drought Risk | Time                | Drought Risk | Time                 | Drought Risk |
| 1                   | 0.04196      | 1                   | 0.0828       | 1                    | 0.04487      |
| 2                   | 0.08392      | 2                   | 0.1448       | 2                    | 0.10256      |
| 3                   | 0.15385      | 3                   | 0.1793       | 3                    | 0.14103      |
| 4                   | 0.23776      | 4                   | 0.2276       | 4                    | 0.17308      |
| 5                   | 0.3007       | 5                   | 0.2552       | 5                    | 0.19872      |
| 6                   | 0.33566      | 6                   | 0.2828       | 6                    | 0.21795      |
| 7                   | 0.41958      | 7                   | 0.3034       | 7                    | 0.23718      |
| 8                   | 0.45455      | 8                   | 0.331        | 8                    | 0.26923      |
| 9                   | 0.4965       | 9                   | 0.3586       | 9                    | 0.29487      |
| 10                  | 0.55245      | 10                  | 0.3862       | 10                   | 0.30128      |
| 11                  | 0.58741      | 11                  | 0.4069       | 11                   | 0.3141       |
| 12                  | 0.62937      | 12                  | 0.4345       | 12                   | 0.32692      |
| 13                  | 0.66434      | 13                  | 0.469        | 13                   | 0.34615      |
| 14                  | 0.67133      | 14                  | 0.4966       | 14                   | 0.35897      |
| 15                  | 0.70629      | 15                  | 0.531        | 15                   | 0.38462      |
| 16                  | 0.74126      | 16                  | 0.5586       | 16                   | 0.40385      |
| 17                  | 0.78322      | 17                  | 0.6          | 17                   | 0.42308      |

|    |         |    |        |    |         |
|----|---------|----|--------|----|---------|
| 18 | 0.82517 | 18 | 0.6414 | 18 | 0.44231 |
| 19 | 0.83217 | 19 | 0.6621 | 19 | 0.46154 |
| 20 | 0.83916 | 20 | 0.6828 | 20 | 0.47436 |
| 21 | 0.85315 | 21 | 0.6966 | 21 | 0.48718 |
| 22 | 0.86713 | 22 | 0.7103 | 22 | 0.51282 |
| 23 | 0.88112 | 23 | 0.731  | 23 | 0.53846 |
| 24 | 0.9021  | 24 | 0.7448 | 24 | 0.5641  |
| 25 | 0.91608 | 25 | 0.7586 | 25 | 0.59615 |
| 26 | 0.93706 | 26 | 0.7793 | 26 | 0.60256 |
| 27 | 0.95105 | 27 | 0.7931 | 27 | 0.62179 |
| 33 | 0.95804 | 28 | 0.8069 | 28 | 0.62821 |
| 34 | 0.96503 | 29 | 0.8276 | 29 | 0.63462 |
| 35 | 0.97203 | 30 | 0.8414 | 30 | 0.64103 |
| 43 | 0.97902 | 31 | 0.8552 | 31 | 0.64744 |
| 44 | 0.98601 | 32 | 0.8621 | 32 | 0.65385 |
| 45 | 0.99301 | 33 | 0.869  | 33 | 0.66026 |
| 46 | 1       | 34 | 0.8759 | 34 | 0.66667 |
|    |         | 35 | 0.8897 | 35 | 0.67949 |
|    |         | 36 | 0.9034 | 36 | 0.69231 |
|    |         | 37 | 0.9172 | 37 | 0.70513 |
|    |         | 38 | 0.9379 | 38 | 0.72436 |
|    |         | 39 | 0.9448 | 39 | 0.73718 |
|    |         | 40 | 0.9586 | 40 | 0.75    |
|    |         | 44 | 0.9655 | 41 | 0.76282 |
|    |         | 45 | 0.9724 | 42 | 0.77564 |
|    |         | 46 | 0.9793 | 43 | 0.78846 |
|    |         | 47 | 0.9862 | 44 | 0.80128 |
|    |         | 48 | 0.9931 | 45 | 0.8141  |
|    |         | 77 | 1      | 46 | 0.82692 |
|    |         |    |        | 47 | 0.83333 |
|    |         |    |        | 71 | 0.83974 |
|    |         |    |        | 72 | 0.85256 |
|    |         |    |        | 73 | 0.86538 |
|    |         |    |        | 74 | 0.87821 |
|    |         |    |        | 75 | 0.89103 |
|    |         |    |        | 76 | 0.90385 |
|    |         |    |        | 77 | 0.91667 |
|    |         |    |        | 78 | 0.92949 |
|    |         |    |        | 79 | 0.94231 |
|    |         |    |        | 80 | 0.95513 |
|    |         |    |        | 81 | 0.96795 |
|    |         |    |        | 82 | 0.97436 |
|    |         |    |        | 83 | 0.98077 |
|    |         |    |        | 84 | 0.98718 |
|    |         |    |        | 98 | 0.99359 |

**Table S14.** Akhisar station Kaplan-Meier survival estimates according to SPEI-3

| Kaplan-Meier Wet to Dry (SPEI3) |        |         |          |         |                 |                 |
|---------------------------------|--------|---------|----------|---------|-----------------|-----------------|
|                                 |        | n       | events   | median  | 0.95LCL         | 0.95UCL         |
|                                 |        | 151     | 151      | 8       | 7               | 10              |
| time                            | n.risk | n.event | survival | std.err | lower 95%<br>CI | upper 95%<br>CI |
| 0                               | 151    | 1       | 0.99338  | 0.0066  | 0.980525        | 10.000          |
| 1                               | 150    | 9       | 0.93377  | 0.0202  | 0.894942        | 0.9743          |
| 2                               | 141    | 5       | 0.90066  | 0.0243  | 0.854195        | 0.9497          |
| 3                               | 136    | 7       | 0.8543   | 0.0287  | 0.799846        | 0.9125          |
| 4                               | 129    | 14      | 0.76159  | 0.0347  | 0.696569        | 0.8327          |
| 5                               | 115    | 10      | 0.69536  | 0.0375  | 0.625696        | 0.7728          |
| 6                               | 105    | 13      | 0.60927  | 0.0397  | 0.536215        | 0.6923          |
| 7                               | 92     | 10      | 0.54305  | 0.0405  | 0.469132        | 0.6286          |
| 8                               | 82     | 11      | 0.4702   | 0.0406  | 0.396965        | 0.5569          |
| 9                               | 71     | 4       | 0.44371  | 0.0404  | 0.371139        | 0.5305          |
| 10                              | 67     | 7       | 0.39735  | 0.0398  | 0.326487        | 0.4836          |
| 11                              | 60     | 4       | 0.37086  | 0.0393  | 0.301293        | 0.4565          |
| 12                              | 56     | 3       | 0.35099  | 0.0388  | 0.282557        | 0.436           |
| 13                              | 53     | 5       | 0.31788  | 0.0379  | 0.251648        | 0.4015          |
| 14                              | 48     | 5       | 0.28477  | 0.0367  | 0.221163        | 0.3667          |
| 15                              | 43     | 4       | 0.25828  | 0.0356  | 0.197106        | 0.3384          |
| 16                              | 39     | 6       | 0.21854  | 0.0336  | 0.16164         | 0.2955          |
| 17                              | 33     | 4       | 0.19205  | 0.0321  | 0.138466        | 0.2664          |
| 18                              | 29     | 5       | 0.15894  | 0.0298  | 0.110126        | 0.2294          |
| 19                              | 24     | 3       | 0.13907  | 0.0282  | 0.093518        | 0.2068          |
| 20                              | 21     | 2       | 0.12583  | 0.027   | 0.082641        | 0.1916          |
| 21                              | 19     | 1       | 0.11921  | 0.0264  | 0.077269        | 0.1839          |
| 22                              | 18     | 2       | 0.10596  | 0.025   | 0.06667         | 0.1684          |
| 23                              | 16     | 1       | 0.09934  | 0.0243  | 0.061452        | 0.1606          |
| 24                              | 15     | 1       | 0.09272  | 0.0236  | 0.056294        | 0.1527          |
| 25                              | 14     | 1       | 0.08609  | 0.0228  | 0.051201        | 0.1448          |
| 26                              | 13     | 2       | 0.07285  | 0.0211  | 0.041238        | 0.1287          |
| 27                              | 11     | 1       | 0.06623  | 0.0202  | 0.036384        | 0.1205          |
| 28                              | 10     | 1       | 0.0596   | 0.0193  | 0.031631        | 0.1123          |
| 29                              | 9      | 1       | 0.05298  | 0.0182  | 0.026993        | 0.104           |
| 32                              | 8      | 1       | 0.04636  | 0.0171  | 0.022488        | 0.0956          |
| 40                              | 7      | 1       | 0.03974  | 0.0159  | 0.01814         | 0.087           |
| 41                              | 6      | 1       | 0.03311  | 0.0146  | 0.013986        | 0.0784          |
| 42                              | 5      | 1       | 0.02649  | 0.0131  | 0.010073        | 0.0697          |
| 49                              | 4      | 1       | 0.01987  | 0.0114  | 0.006481        | 0.0609          |
| 50                              | 3      | 1       | 0.01325  | 0.0093  | 0.003343        | 0.0525          |

|    |   |   |         |        |          |        |
|----|---|---|---------|--------|----------|--------|
| 51 | 2 | 1 | 0.00662 | 0.0066 | 0.000939 | 0.0467 |
| 52 | 1 | 1 | 0       | NaN    | NA       | NA     |

**Table S15.** Akhisar station Kaplan-Meier survival estimates according to SPEI-6

| Kaplan-Meier Wet to Dry (SPEI6) |        |         |          |         |                 |                 |
|---------------------------------|--------|---------|----------|---------|-----------------|-----------------|
|                                 |        | n       | events   | median  | 0.95LCL         | 0.95UCL         |
|                                 |        | 150     | 150      | 13      | 11              | 16              |
| time                            | n.risk | n.event | survival | std.err | lower 95%<br>CI | upper 95%<br>CI |
| 0                               | 150    | 1       | 0.99333  | 0.00664 | 0.980396        | 10.000          |
| 1                               | 149    | 9       | 0.93333  | 0.02037 | 0.894256        | 0.9741          |
| 2                               | 140    | 12      | 0.85333  | 0.02889 | 0.798556        | 0.9119          |
| 3                               | 128    | 7       | 0.80667  | 0.03224 | 0.745881        | 0.8724          |
| 4                               | 121    | 5       | 0.77333  | 0.03418 | 0.709153        | 0.8433          |
| 5                               | 116    | 2       | 0.76     | 0.03487 | 0.694637        | 0.8315          |
| 6                               | 114    | 3       | 0.74     | 0.03581 | 0.673032        | 0.8136          |
| 7                               | 111    | 5       | 0.70667  | 0.03717 | 0.637437        | 0.7834          |
| 8                               | 106    | 5       | 0.67333  | 0.03829 | 0.602312        | 0.7527          |
| 9                               | 101    | 6       | 0.63333  | 0.03935 | 0.560726        | 0.7153          |
| 10                              | 95     | 6       | 0.59333  | 0.04011 | 0.519709        | 0.6774          |
| 11                              | 89     | 5       | 0.56     | 0.04053 | 0.48594         | 0.6453          |
| 12                              | 84     | 6       | 0.52     | 0.04079 | 0.445892        | 0.6064          |
| 13                              | 78     | 5       | 0.48667  | 0.04081 | 0.412907        | 0.5736          |
| 14                              | 73     | 6       | 0.44667  | 0.04059 | 0.373791        | 0.5338          |
| 15                              | 67     | 4       | 0.42     | 0.0403  | 0.347998        | 0.5069          |
| 16                              | 63     | 4       | 0.39333  | 0.03989 | 0.322438        | 0.4798          |
| 17                              | 59     | 5       | 0.36     | 0.03919 | 0.290827        | 0.4456          |
| 18                              | 54     | 5       | 0.32667  | 0.03829 | 0.259611        | 0.411           |
| 19                              | 49     | 3       | 0.30667  | 0.03765 | 0.241082        | 0.3901          |
| 20                              | 46     | 1       | 0.3      | 0.03742 | 0.23494         | 0.3831          |
| 21                              | 45     | 2       | 0.28667  | 0.03692 | 0.222712        | 0.369           |
| 22                              | 43     | 3       | 0.26667  | 0.03611 | 0.20451         | 0.3477          |
| 23                              | 40     | 1       | 0.26     | 0.03581 | 0.198483        | 0.3406          |
| 24                              | 39     | 3       | 0.24     | 0.03487 | 0.180524        | 0.3191          |
| 25                              | 36     | 1       | 0.23333  | 0.03453 | 0.174581        | 0.3119          |
| 26                              | 35     | 1       | 0.22667  | 0.03418 | 0.168661        | 0.3046          |
| 27                              | 34     | 2       | 0.21333  | 0.03345 | 0.156891        | 0.2901          |
| 28                              | 32     | 2       | 0.2      | 0.03266 | 0.145221        | 0.2754          |
| 29                              | 30     | 1       | 0.19333  | 0.03224 | 0.139425        | 0.2681          |
| 30                              | 29     | 2       | 0.18     | 0.03137 | 0.127918        | 0.2533          |
| 31                              | 27     | 2       | 0.16667  | 0.03043 | 0.116531        | 0.2384          |
| 32                              | 25     | 1       | 0.16     | 0.02993 | 0.110885        | 0.2309          |
| 33                              | 24     | 1       | 0.15333  | 0.02942 | 0.105274        | 0.2233          |
| 34                              | 23     | 1       | 0.14667  | 0.02889 | 0.099699        | 0.2158          |

|    |    |   |         |         |          |        |
|----|----|---|---------|---------|----------|--------|
| 41 | 22 | 1 | 0.14    | 0.02833 | 0.094161 | 0.2082 |
| 42 | 21 | 2 | 0.12667 | 0.02716 | 0.083209 | 0.1928 |
| 43 | 19 | 1 | 0.12    | 0.02653 | 0.077799 | 0.1851 |
| 44 | 18 | 1 | 0.11333 | 0.02588 | 0.072437 | 0.1773 |
| 45 | 17 | 1 | 0.10667 | 0.0252  | 0.067127 | 0.1695 |
| 46 | 16 | 1 | 0.1     | 0.02449 | 0.061873 | 0.1616 |
| 47 | 15 | 1 | 0.09333 | 0.02375 | 0.056679 | 0.1537 |
| 48 | 14 | 1 | 0.08667 | 0.02297 | 0.051551 | 0.1457 |
| 64 | 13 | 1 | 0.08    | 0.02215 | 0.046495 | 0.1377 |
| 65 | 12 | 1 | 0.07333 | 0.02128 | 0.041519 | 0.1295 |
| 66 | 11 | 1 | 0.06667 | 0.02037 | 0.036632 | 0.1213 |
| 75 | 10 | 1 | 0.06    | 0.01939 | 0.031846 | 0.113  |
| 76 | 9  | 1 | 0.05333 | 0.01835 | 0.027176 | 0.1047 |
| 77 | 8  | 1 | 0.04667 | 0.01722 | 0.02264  | 0.0962 |
| 78 | 7  | 1 | 0.04    | 0.016   | 0.018263 | 0.0876 |
| 79 | 6  | 1 | 0.03333 | 0.01466 | 0.01408  | 0.0789 |
| 80 | 5  | 1 | 0.02667 | 0.01315 | 0.010141 | 0.0701 |
| 81 | 4  | 1 | 0.02    | 0.01143 | 0.006524 | 0.0613 |
| 82 | 3  | 1 | 0.01333 | 0.00937 | 0.003366 | 0.0528 |
| 83 | 2  | 1 | 0.00667 | 0.00664 | 0.000945 | 0.047  |
| 84 | 1  | 1 | 0       | NaN     | NA       | NA     |

**Table S16.** Akhisar station Kaplan-Meier survival estimates according to SPEI-12

| Kaplan-Meier Wet to Dry (SPEI12) |        |         |          |         |              |              |
|----------------------------------|--------|---------|----------|---------|--------------|--------------|
|                                  |        | n       | events   | median  | 0.95LCL      | 0.95UCL      |
|                                  |        | 148     | 148      | 16      | 13           | 20           |
| time                             | n.risk | n.event | survival | std.err | lower 95% CI | upper 95% CI |
| 1                                | 148    | 8       | 0.94595  | 0.01859 | 0.910208     | 0.9831       |
| 2                                | 140    | 5       | 0.91216  | 0.02327 | 0.86768      | 0.9589       |
| 3                                | 135    | 4       | 0.88514  | 0.02621 | 0.835227     | 0.938        |
| 4                                | 131    | 3       | 0.86486  | 0.0281  | 0.811504     | 0.9217       |
| 5                                | 128    | 5       | 0.83108  | 0.0308  | 0.772857     | 0.8937       |
| 6                                | 123    | 4       | 0.80405  | 0.03263 | 0.742583     | 0.8706       |
| 7                                | 119    | 4       | 0.77703  | 0.03421 | 0.71278      | 0.8471       |
| 8                                | 115    | 4       | 0.75     | 0.03559 | 0.683384     | 0.8231       |
| 9                                | 111    | 5       | 0.71622  | 0.03706 | 0.647145     | 0.7927       |
| 10                               | 106    | 5       | 0.68243  | 0.03827 | 0.611406     | 0.7617       |
| 11                               | 101    | 6       | 0.64189  | 0.03941 | 0.569116     | 0.724        |
| 12                               | 95     | 6       | 0.60135  | 0.04025 | 0.527424     | 0.6856       |
| 13                               | 89     | 4       | 0.57432  | 0.04064 | 0.499943     | 0.6598       |
| 14                               | 85     | 4       | 0.5473   | 0.04092 | 0.472703     | 0.6337       |
| 15                               | 81     | 4       | 0.52027  | 0.04107 | 0.445699     | 0.6073       |
| 16                               | 77     | 4       | 0.49324  | 0.0411  | 0.418929     | 0.5807       |



|    |    |   |         |         |          |        |
|----|----|---|---------|---------|----------|--------|
| 17 | 73 | 4 | 0.46622 | 0.04101 | 0.392392 | 0.5539 |
| 18 | 69 | 4 | 0.43919 | 0.04079 | 0.366089 | 0.5269 |
| 19 | 65 | 2 | 0.42568 | 0.04064 | 0.353026 | 0.5133 |
| 20 | 63 | 2 | 0.41216 | 0.04046 | 0.340023 | 0.4996 |
| 21 | 61 | 1 | 0.40541 | 0.04036 | 0.333544 | 0.4927 |
| 22 | 60 | 1 | 0.39865 | 0.04025 | 0.327081 | 0.4859 |
| 23 | 59 | 1 | 0.39189 | 0.04013 | 0.320633 | 0.479  |
| 24 | 58 | 2 | 0.37838 | 0.03987 | 0.307783 | 0.4652 |
| 25 | 56 | 1 | 0.37162 | 0.03972 | 0.301382 | 0.4582 |
| 26 | 55 | 1 | 0.36486 | 0.03957 | 0.294997 | 0.4513 |
| 27 | 54 | 1 | 0.35811 | 0.03941 | 0.288628 | 0.4443 |
| 28 | 53 | 1 | 0.35135 | 0.03924 | 0.282276 | 0.4373 |
| 29 | 52 | 1 | 0.34459 | 0.03906 | 0.27594  | 0.4303 |
| 30 | 51 | 1 | 0.33784 | 0.03888 | 0.26962  | 0.4233 |
| 31 | 50 | 1 | 0.33108 | 0.03868 | 0.263318 | 0.4163 |
| 32 | 49 | 1 | 0.32432 | 0.03848 | 0.257033 | 0.4092 |
| 33 | 48 | 1 | 0.31757 | 0.03827 | 0.250766 | 0.4022 |
| 34 | 47 | 1 | 0.31081 | 0.03804 | 0.244516 | 0.3951 |
| 35 | 46 | 1 | 0.30405 | 0.03781 | 0.238284 | 0.388  |
| 36 | 45 | 1 | 0.2973  | 0.03757 | 0.232071 | 0.3809 |
| 37 | 44 | 1 | 0.29054 | 0.03732 | 0.225876 | 0.3737 |
| 38 | 43 | 2 | 0.27703 | 0.03679 | 0.213545 | 0.3594 |
| 39 | 41 | 1 | 0.27027 | 0.0365  | 0.207409 | 0.3522 |
| 40 | 40 | 1 | 0.26351 | 0.03621 | 0.201294 | 0.345  |
| 41 | 39 | 1 | 0.25676 | 0.03591 | 0.195199 | 0.3377 |
| 42 | 38 | 1 | 0.25    | 0.03559 | 0.189126 | 0.3305 |
| 43 | 37 | 1 | 0.24324 | 0.03527 | 0.183075 | 0.3232 |
| 44 | 36 | 1 | 0.23649 | 0.03493 | 0.177046 | 0.3159 |
| 45 | 35 | 1 | 0.22973 | 0.03458 | 0.17104  | 0.3086 |
| 46 | 34 | 2 | 0.21622 | 0.03384 | 0.159101 | 0.2938 |
| 47 | 32 | 1 | 0.20946 | 0.03345 | 0.153169 | 0.2864 |
| 48 | 31 | 1 | 0.2027  | 0.03305 | 0.147263 | 0.279  |
| 60 | 30 | 1 | 0.19595 | 0.03263 | 0.141384 | 0.2716 |
| 64 | 29 | 1 | 0.18919 | 0.03219 | 0.135534 | 0.2641 |
| 65 | 28 | 1 | 0.18243 | 0.03175 | 0.129713 | 0.2566 |
| 74 | 27 | 1 | 0.17568 | 0.03128 | 0.123922 | 0.249  |
| 75 | 26 | 1 | 0.16892 | 0.0308  | 0.118163 | 0.2415 |
| 76 | 25 | 1 | 0.16216 | 0.0303  | 0.112437 | 0.2339 |
| 77 | 24 | 1 | 0.15541 | 0.02978 | 0.106746 | 0.2262 |
| 78 | 23 | 1 | 0.14865 | 0.02924 | 0.101092 | 0.2186 |
| 79 | 22 | 1 | 0.14189 | 0.02868 | 0.095476 | 0.2109 |
| 80 | 21 | 1 | 0.13514 | 0.0281  | 0.0899   | 0.2031 |
| 81 | 20 | 1 | 0.12838 | 0.0275  | 0.084368 | 0.1953 |
| 82 | 19 | 1 | 0.12162 | 0.02687 | 0.078882 | 0.1875 |
| 83 | 18 | 1 | 0.11486 | 0.02621 | 0.073444 | 0.1796 |

|    |    |   |         |         |          |        |
|----|----|---|---------|---------|----------|--------|
| 84 | 17 | 1 | 0.10811 | 0.02552 | 0.06806  | 0.1717 |
| 85 | 16 | 2 | 0.09459 | 0.02406 | 0.057465 | 0.1557 |
| 86 | 14 | 2 | 0.08108 | 0.02244 | 0.047138 | 0.1395 |
| 87 | 12 | 1 | 0.07432 | 0.02156 | 0.042093 | 0.1312 |
| 88 | 11 | 1 | 0.06757 | 0.02063 | 0.037138 | 0.1229 |
| 89 | 10 | 1 | 0.06081 | 0.01964 | 0.032286 | 0.1145 |
| 90 | 9  | 1 | 0.05405 | 0.01859 | 0.027551 | 0.1061 |
| 91 | 8  | 1 | 0.0473  | 0.01745 | 0.022952 | 0.0975 |
| 92 | 7  | 1 | 0.04054 | 0.01621 | 0.018514 | 0.0888 |
| 93 | 6  | 1 | 0.03378 | 0.01485 | 0.014273 | 0.08   |
| 94 | 5  | 1 | 0.02703 | 0.01333 | 0.01028  | 0.0711 |
| 95 | 4  | 1 | 0.02027 | 0.01158 | 0.006613 | 0.0621 |
| 96 | 3  | 2 | 0.00676 | 0.00673 | 0.000958 | 0.0476 |
| 97 | 1  | 1 | 0       | NaN     | NA       | NA     |

**Table S17.** Akhisar station Kaplan-Meier drought risk estimates according to SPEI-3, 6, and 12

| Drought Risk (SPEI3) |              | Drought Risk (SPEI6) |              | Drought Risk (SPEI12) |              |
|----------------------|--------------|----------------------|--------------|-----------------------|--------------|
| Time                 | Drought Risk | Time                 | Drought Risk | Time                  | Drought Risk |
| 0                    | 0.00662      | 0                    | 0.00667      | 1                     | 0.05405      |
| 1                    | 0.06623      | 1                    | 0.06667      | 2                     | 0.08784      |
| 2                    | 0.09934      | 2                    | 0.14667      | 3                     | 0.11486      |
| 3                    | 0.1457       | 3                    | 0.19333      | 4                     | 0.13514      |
| 4                    | 0.23841      | 4                    | 0.22667      | 5                     | 0.16892      |
| 5                    | 0.30464      | 5                    | 0.24         | 6                     | 0.19595      |
| 6                    | 0.39073      | 6                    | 0.26         | 7                     | 0.22297      |
| 7                    | 0.45695      | 7                    | 0.29333      | 8                     | 0.25         |
| 8                    | 0.5298       | 8                    | 0.32667      | 9                     | 0.28378      |
| 9                    | 0.55629      | 9                    | 0.36667      | 10                    | 0.31757      |
| 10                   | 0.60265      | 10                   | 0.40667      | 11                    | 0.35811      |
| 11                   | 0.62914      | 11                   | 0.44         | 12                    | 0.39865      |
| 12                   | 0.64901      | 12                   | 0.48         | 13                    | 0.42568      |
| 13                   | 0.68212      | 13                   | 0.51333      | 14                    | 0.4527       |
| 14                   | 0.71523      | 14                   | 0.55333      | 15                    | 0.47973      |
| 15                   | 0.74172      | 15                   | 0.58         | 16                    | 0.50676      |
| 16                   | 0.78146      | 16                   | 0.60667      | 17                    | 0.53378      |
| 17                   | 0.80795      | 17                   | 0.64         | 18                    | 0.56081      |
| 18                   | 0.84106      | 18                   | 0.67333      | 19                    | 0.57432      |
| 19                   | 0.86093      | 19                   | 0.69333      | 20                    | 0.58784      |
| 20                   | 0.87417      | 20                   | 0.7          | 21                    | 0.59459      |
| 21                   | 0.88079      | 21                   | 0.71333      | 22                    | 0.60135      |
| 22                   | 0.89404      | 22                   | 0.73333      | 23                    | 0.60811      |
| 23                   | 0.90066      | 23                   | 0.74         | 24                    | 0.62162      |
| 24                   | 0.90728      | 24                   | 0.76         | 25                    | 0.62838      |
| 25                   | 0.91391      | 25                   | 0.76667      | 26                    | 0.63514      |

|    |         |    |         |    |         |
|----|---------|----|---------|----|---------|
| 26 | 0.92715 | 26 | 0.77333 | 27 | 0.64189 |
| 27 | 0.93377 | 27 | 0.78667 | 28 | 0.64865 |
| 28 | 0.9404  | 28 | 0.8     | 29 | 0.65541 |
| 29 | 0.94702 | 29 | 0.80667 | 30 | 0.66216 |
| 32 | 0.95364 | 30 | 0.82    | 31 | 0.66892 |
| 40 | 0.96026 | 31 | 0.83333 | 32 | 0.67568 |
| 41 | 0.96689 | 32 | 0.84    | 33 | 0.68243 |
| 42 | 0.97351 | 33 | 0.84667 | 34 | 0.68919 |
| 49 | 0.98013 | 34 | 0.85333 | 35 | 0.69595 |
| 50 | 0.98675 | 41 | 0.86    | 36 | 0.7027  |
| 51 | 0.99338 | 42 | 0.87333 | 37 | 0.70946 |
| 52 | 1       | 43 | 0.88    | 38 | 0.72297 |
|    |         | 44 | 0.88667 | 39 | 0.72973 |
|    |         | 45 | 0.89333 | 40 | 0.73649 |
|    |         | 46 | 0.9     | 41 | 0.74324 |
|    |         | 47 | 0.90667 | 42 | 0.75    |
|    |         | 48 | 0.91333 | 43 | 0.75676 |
|    |         | 64 | 0.92    | 44 | 0.76351 |
|    |         | 65 | 0.92667 | 45 | 0.77027 |
|    |         | 66 | 0.93333 | 46 | 0.78378 |
|    |         | 75 | 0.94    | 47 | 0.79054 |
|    |         | 76 | 0.94667 | 48 | 0.7973  |
|    |         | 77 | 0.95333 | 60 | 0.80405 |
|    |         | 78 | 0.96    | 64 | 0.81081 |
|    |         | 79 | 0.96667 | 65 | 0.81757 |
|    |         | 80 | 0.97333 | 74 | 0.82432 |
|    |         | 81 | 0.98    | 75 | 0.83108 |
|    |         | 82 | 0.98667 | 76 | 0.83784 |
|    |         | 83 | 0.99333 | 77 | 0.84459 |
|    |         | 84 | 1       | 78 | 0.85135 |
|    |         |    |         | 79 | 0.85811 |
|    |         |    |         | 80 | 0.86486 |
|    |         |    |         | 81 | 0.87162 |
|    |         |    |         | 82 | 0.87838 |
|    |         |    |         | 83 | 0.88514 |
|    |         |    |         | 84 | 0.89189 |
|    |         |    |         | 85 | 0.90541 |
|    |         |    |         | 86 | 0.91892 |
|    |         |    |         | 87 | 0.92568 |
|    |         |    |         | 88 | 0.93243 |
|    |         |    |         | 89 | 0.93919 |
|    |         |    |         | 90 | 0.94595 |
|    |         |    |         | 91 | 0.9527  |
|    |         |    |         | 92 | 0.95946 |
|    |         |    |         | 93 | 0.96622 |

|    |         |
|----|---------|
| 94 | 0.97297 |
| 95 | 0.97973 |
| 96 | 0.99324 |
| 97 | 1       |

**Table S18.** Alasehir station Kaplan-Meier survival estimates according to SPI-3

| Kaplan-Meier Wet to Dry (SPI3) |        |         |          |         |                 |                 |
|--------------------------------|--------|---------|----------|---------|-----------------|-----------------|
|                                |        | n       | events   | median  | 0.95LCL         | 0.95UCL         |
|                                |        | 162     | 162      | 9       | 8               | 11              |
| time                           | n.risk | n.event | survival | std.err | lower 95%<br>CL | upper 95%<br>CL |
| 1                              | 162    | 11      | 0.9321   | 0.01977 | 0.894153        | 0.9717          |
| 2                              | 151    | 3       | 0.91358  | 0.02208 | 0.871321        | 0.9579          |
| 3                              | 148    | 9       | 0.85802  | 0.02742 | 0.805927        | 0.9135          |
| 4                              | 139    | 9       | 0.80247  | 0.03128 | 0.743444        | 0.8662          |
| 5                              | 130    | 13      | 0.72222  | 0.03519 | 0.656441        | 0.7946          |
| 6                              | 117    | 11      | 0.65432  | 0.03737 | 0.585035        | 0.7318          |
| 7                              | 106    | 13      | 0.57407  | 0.03885 | 0.502763        | 0.6555          |
| 8                              | 93     | 10      | 0.51235  | 0.03927 | 0.440877        | 0.5954          |
| 9                              | 83     | 6       | 0.47531  | 0.03924 | 0.404306        | 0.5588          |
| 10                             | 77     | 5       | 0.44444  | 0.03904 | 0.374151        | 0.5279          |
| 11                             | 72     | 6       | 0.40741  | 0.0386  | 0.338355        | 0.4906          |
| 12                             | 66     | 5       | 0.37654  | 0.03807 | 0.308859        | 0.4591          |
| 13                             | 61     | 3       | 0.35802  | 0.03767 | 0.291313        | 0.44            |
| 14                             | 58     | 1       | 0.35185  | 0.03752 | 0.285491        | 0.4336          |
| 15                             | 57     | 4       | 0.32716  | 0.03686 | 0.262334        | 0.408           |
| 16                             | 53     | 4       | 0.30247  | 0.03609 | 0.239399        | 0.3822          |
| 17                             | 49     | 3       | 0.28395  | 0.03543 | 0.222353        | 0.3626          |
| 18                             | 46     | 6       | 0.24691  | 0.03388 | 0.18869         | 0.3231          |
| 19                             | 40     | 4       | 0.22222  | 0.03266 | 0.166599        | 0.2964          |
| 20                             | 36     | 4       | 0.19753  | 0.03128 | 0.144824        | 0.2694          |
| 21                             | 32     | 4       | 0.17284  | 0.02971 | 0.123408        | 0.2421          |
| 22                             | 28     | 3       | 0.15432  | 0.02838 | 0.107614        | 0.2213          |
| 23                             | 25     | 2       | 0.14198  | 0.02742 | 0.097231        | 0.2073          |
| 24                             | 23     | 4       | 0.11728  | 0.02528 | 0.076872        | 0.1789          |
| 25                             | 19     | 3       | 0.09877  | 0.02344 | 0.062028        | 0.1573          |
| 26                             | 16     | 2       | 0.08642  | 0.02208 | 0.052381        | 0.1426          |
| 27                             | 14     | 2       | 0.07407  | 0.02058 | 0.042976        | 0.1277          |
| 28                             | 12     | 2       | 0.06173  | 0.01891 | 0.033865        | 0.1125          |
| 34                             | 10     | 1       | 0.05556  | 0.018   | 0.029443        | 0.1048          |
| 35                             | 9      | 1       | 0.04938  | 0.01702 | 0.025128        | 0.097           |
| 36                             | 8      | 2       | 0.03704  | 0.01484 | 0.01689         | 0.0812          |
| 37                             | 6      | 3       | 0.01852  | 0.01059 | 0.006036        | 0.0568          |
| 38                             | 3      | 2       | 0.00617  | 0.00615 | 0.000875        | 0.0436          |

|    |   |   |   |     |    |    |
|----|---|---|---|-----|----|----|
| 39 | 1 | 1 | 0 | NaN | NA | NA |
|----|---|---|---|-----|----|----|

**Table S19.** Alasehir station Kaplan-Meier survival estimates according to SPI-6

| Kaplan-Meier Wet to Dry (SPI6) |        |         |          |         |                 |                 |
|--------------------------------|--------|---------|----------|---------|-----------------|-----------------|
|                                |        | n       | events   | median  | 0.95LCL         | 0.95UCL         |
|                                |        | 143     | 143      | 13      | 10              | 16              |
| time                           | n.risk | n.event | survival | std.err | lower 95%<br>CL | upper 95%<br>CL |
| 1                              | 143    | 7       | 0.95105  | 0.01804 | 0.916334        | 0.9871          |
| 2                              | 136    | 7       | 0.9021   | 0.02485 | 0.854681        | 0.9521          |
| 3                              | 129    | 4       | 0.87413  | 0.02774 | 0.821415        | 0.9302          |
| 4                              | 125    | 5       | 0.83916  | 0.03072 | 0.781056        | 0.9016          |
| 5                              | 120    | 4       | 0.81119  | 0.03273 | 0.749515        | 0.8779          |
| 6                              | 116    | 5       | 0.77622  | 0.03485 | 0.710834        | 0.8476          |
| 7                              | 111    | 9       | 0.71329  | 0.03782 | 0.642888        | 0.7914          |
| 8                              | 102    | 6       | 0.67133  | 0.03928 | 0.59859         | 0.7529          |
| 9                              | 96     | 7       | 0.62238  | 0.04054 | 0.547783        | 0.7071          |
| 10                             | 89     | 8       | 0.56643  | 0.04144 | 0.490765        | 0.6538          |
| 11                             | 81     | 5       | 0.53147  | 0.04173 | 0.455663        | 0.6199          |
| 12                             | 76     | 4       | 0.5035   | 0.04181 | 0.42787         | 0.5925          |
| 13                             | 72     | 3       | 0.48252  | 0.04179 | 0.407191        | 0.5718          |
| 14                             | 69     | 3       | 0.46154  | 0.04169 | 0.386655        | 0.5509          |
| 15                             | 66     | 6       | 0.41958  | 0.04127 | 0.346015        | 0.5088          |
| 16                             | 60     | 5       | 0.38462  | 0.04068 | 0.3126          | 0.4732          |
| 17                             | 55     | 2       | 0.37063  | 0.04039 | 0.299352        | 0.4589          |
| 18                             | 53     | 2       | 0.35664  | 0.04006 | 0.286174        | 0.4445          |
| 19                             | 51     | 2       | 0.34266  | 0.03969 | 0.273068        | 0.43            |
| 20                             | 49     | 2       | 0.32867  | 0.03928 | 0.260035        | 0.4154          |
| 21                             | 47     | 2       | 0.31469  | 0.03883 | 0.247077        | 0.4008          |
| 22                             | 45     | 3       | 0.29371  | 0.03809 | 0.227788        | 0.3787          |
| 23                             | 42     | 3       | 0.27273  | 0.03724 | 0.208685        | 0.3564          |
| 24                             | 39     | 4       | 0.24476  | 0.03595 | 0.183524        | 0.3264          |
| 25                             | 35     | 5       | 0.20979  | 0.03405 | 0.152629        | 0.2884          |
| 26                             | 30     | 2       | 0.1958   | 0.03318 | 0.140464        | 0.2729          |
| 27                             | 28     | 2       | 0.18182  | 0.03225 | 0.128422        | 0.2574          |
| 28                             | 26     | 2       | 0.16783  | 0.03125 | 0.116513        | 0.2418          |
| 29                             | 24     | 3       | 0.14685  | 0.0296  | 0.098927        | 0.218           |
| 30                             | 21     | 1       | 0.13986  | 0.029   | 0.093147        | 0.21            |
| 31                             | 20     | 1       | 0.13287  | 0.02838 | 0.087413        | 0.202           |
| 33                             | 19     | 2       | 0.11888  | 0.02706 | 0.07609         | 0.1857          |
| 34                             | 17     | 2       | 0.1049   | 0.02562 | 0.064986        | 0.1693          |
| 35                             | 15     | 2       | 0.09091  | 0.02404 | 0.054139        | 0.1527          |
| 36                             | 13     | 3       | 0.06993  | 0.02133 | 0.038466        | 0.1271          |
| 37                             | 10     | 3       | 0.04895  | 0.01804 | 0.023769        | 0.1008          |

|    |   |   |         |         |          |        |
|----|---|---|---------|---------|----------|--------|
| 38 | 7 | 2 | 0.03497 | 0.01536 | 0.01478  | 0.0827 |
| 39 | 5 | 1 | 0.02797 | 0.01379 | 0.010644 | 0.0735 |
| 40 | 4 | 1 | 0.02098 | 0.01198 | 0.006847 | 0.0643 |
| 49 | 3 | 1 | 0.01399 | 0.00982 | 0.003532 | 0.0554 |
| 50 | 2 | 1 | 0.00699 | 0.00697 | 0.000992 | 0.0493 |
| 70 | 1 | 1 | 0       | NaN     | NA       | NA     |

**Table S20.** Alasehir station Kaplan-Meier survival estimates according to SPI-12

| Kaplan-Meier Wet to Dry (SPI12) |        |         |          |         |                 |                 |
|---------------------------------|--------|---------|----------|---------|-----------------|-----------------|
|                                 |        | n       | events   | median  | 0.95LCL         | 0.95UCL         |
|                                 |        | 134     | 134      | 29      | 25              | 34              |
| time                            | n.risk | n.event | survival | std.err | lower 95%<br>CL | upper 95%<br>CL |
| 1                               | 134    | 3       | 0.97761  | 0.01278 | 0.95288         | 1               |
| 2                               | 131    | 3       | 0.95522  | 0.01787 | 0.92084         | 0.9909          |
| 3                               | 128    | 3       | 0.93284  | 0.02162 | 0.8914          | 0.9762          |
| 4                               | 125    | 2       | 0.91791  | 0.02371 | 0.87259         | 0.9656          |
| 5                               | 123    | 3       | 0.89552  | 0.02642 | 0.8452          | 0.9488          |
| 6                               | 120    | 1       | 0.88806  | 0.02724 | 0.83625         | 0.9431          |
| 7                               | 119    | 1       | 0.8806   | 0.02801 | 0.82737         | 0.9372          |
| 8                               | 118    | 3       | 0.85821  | 0.03013 | 0.80113         | 0.9194          |
| 9                               | 115    | 3       | 0.83582  | 0.032   | 0.7754          | 0.901           |
| 10                              | 112    | 2       | 0.8209   | 0.03312 | 0.75847         | 0.8885          |
| 11                              | 110    | 1       | 0.81343  | 0.03365 | 0.75008         | 0.8821          |
| 12                              | 109    | 3       | 0.79104  | 0.03512 | 0.72512         | 0.863           |
| 13                              | 106    | 4       | 0.76119  | 0.03683 | 0.69232         | 0.8369          |
| 14                              | 102    | 3       | 0.73881  | 0.03795 | 0.66805         | 0.8171          |
| 15                              | 99     | 3       | 0.71642  | 0.03894 | 0.64403         | 0.7969          |
| 16                              | 96     | 3       | 0.69403  | 0.03981 | 0.62023         | 0.7766          |
| 17                              | 93     | 3       | 0.67164  | 0.04057 | 0.59665         | 0.7561          |
| 18                              | 90     | 2       | 0.65672  | 0.04102 | 0.58105         | 0.7422          |
| 19                              | 88     | 2       | 0.64179  | 0.04142 | 0.56553         | 0.7283          |
| 20                              | 86     | 2       | 0.62687  | 0.04178 | 0.5501          | 0.7143          |
| 21                              | 84     | 1       | 0.6194   | 0.04194 | 0.54242         | 0.7073          |
| 22                              | 83     | 1       | 0.61194  | 0.0421  | 0.53475         | 0.7003          |
| 23                              | 82     | 1       | 0.60448  | 0.04224 | 0.52711         | 0.6932          |
| 24                              | 81     | 3       | 0.58209  | 0.04261 | 0.50429         | 0.6719          |
| 25                              | 78     | 3       | 0.5597   | 0.04288 | 0.48166         | 0.6504          |
| 26                              | 75     | 2       | 0.54478  | 0.04302 | 0.46666         | 0.636           |
| 27                              | 73     | 2       | 0.52985  | 0.04312 | 0.45174         | 0.6215          |
| 28                              | 71     | 2       | 0.51493  | 0.04317 | 0.43689         | 0.6069          |
| 29                              | 69     | 3       | 0.49254  | 0.04319 | 0.41476         | 0.5849          |
| 30                              | 66     | 3       | 0.47015  | 0.04312 | 0.3928          | 0.5627          |
| 31                              | 63     | 3       | 0.44776  | 0.04296 | 0.37101         | 0.5404          |

|     |    |   |         |         |         |        |
|-----|----|---|---------|---------|---------|--------|
| 32  | 60 | 2 | 0.43284 | 0.0428  | 0.35657 | 0.5254 |
| 33  | 58 | 3 | 0.41045 | 0.04249 | 0.33507 | 0.5028 |
| 34  | 55 | 2 | 0.39552 | 0.04224 | 0.32082 | 0.4876 |
| 35  | 53 | 1 | 0.38806 | 0.0421  | 0.31373 | 0.48   |
| 36  | 52 | 1 | 0.3806  | 0.04194 | 0.30666 | 0.4724 |
| 37  | 51 | 1 | 0.37313 | 0.04178 | 0.29961 | 0.4647 |
| 38  | 50 | 1 | 0.36567 | 0.04161 | 0.29258 | 0.457  |
| 39  | 49 | 1 | 0.35821 | 0.04142 | 0.28557 | 0.4493 |
| 40  | 48 | 1 | 0.35075 | 0.04122 | 0.27858 | 0.4416 |
| 41  | 47 | 1 | 0.34328 | 0.04102 | 0.27161 | 0.4339 |
| 42  | 46 | 1 | 0.33582 | 0.0408  | 0.26466 | 0.4261 |
| 43  | 45 | 1 | 0.32836 | 0.04057 | 0.25774 | 0.4183 |
| 44  | 44 | 1 | 0.3209  | 0.04033 | 0.25084 | 0.4105 |
| 45  | 43 | 1 | 0.31343 | 0.04007 | 0.24396 | 0.4027 |
| 46  | 42 | 2 | 0.29851 | 0.03953 | 0.23027 | 0.387  |
| 47  | 40 | 1 | 0.29104 | 0.03924 | 0.22346 | 0.3791 |
| 48  | 39 | 1 | 0.28358 | 0.03894 | 0.21667 | 0.3712 |
| 49  | 38 | 2 | 0.26866 | 0.03829 | 0.20318 | 0.3552 |
| 50  | 36 | 1 | 0.26119 | 0.03795 | 0.19647 | 0.3472 |
| 51  | 35 | 1 | 0.25373 | 0.03759 | 0.18979 | 0.3392 |
| 52  | 34 | 1 | 0.24627 | 0.03722 | 0.18313 | 0.3312 |
| 53  | 33 | 1 | 0.23881 | 0.03683 | 0.17651 | 0.3231 |
| 54  | 32 | 1 | 0.23134 | 0.03643 | 0.16991 | 0.315  |
| 55  | 31 | 1 | 0.22388 | 0.03601 | 0.16335 | 0.3069 |
| 56  | 30 | 1 | 0.21642 | 0.03557 | 0.15681 | 0.2987 |
| 57  | 29 | 1 | 0.20896 | 0.03512 | 0.15031 | 0.2905 |
| 58  | 28 | 1 | 0.20149 | 0.03465 | 0.14384 | 0.2823 |
| 82  | 27 | 1 | 0.19403 | 0.03416 | 0.1374  | 0.274  |
| 83  | 26 | 1 | 0.18657 | 0.03365 | 0.13101 | 0.2657 |
| 84  | 25 | 1 | 0.1791  | 0.03312 | 0.12465 | 0.2574 |
| 85  | 24 | 1 | 0.17164 | 0.03257 | 0.11833 | 0.249  |
| 86  | 23 | 1 | 0.16418 | 0.032   | 0.11205 | 0.2406 |
| 87  | 22 | 1 | 0.15672 | 0.0314  | 0.10581 | 0.2321 |
| 88  | 21 | 1 | 0.14925 | 0.03078 | 0.09963 | 0.2236 |
| 89  | 20 | 1 | 0.14179 | 0.03013 | 0.09349 | 0.2151 |
| 90  | 19 | 1 | 0.13433 | 0.02946 | 0.0874  | 0.2065 |
| 97  | 18 | 1 | 0.12687 | 0.02875 | 0.08136 | 0.1978 |
| 98  | 17 | 1 | 0.1194  | 0.02801 | 0.07539 | 0.1891 |
| 99  | 16 | 1 | 0.11194 | 0.02724 | 0.06948 | 0.1803 |
| 100 | 15 | 2 | 0.09701 | 0.02557 | 0.05788 | 0.1626 |
| 101 | 13 | 2 | 0.08209 | 0.02371 | 0.0466  | 0.1446 |
| 102 | 11 | 2 | 0.06716 | 0.02162 | 0.03574 | 0.1262 |
| 103 | 9  | 1 | 0.0597  | 0.02047 | 0.03049 | 0.1169 |
| 104 | 8  | 1 | 0.05224 | 0.01922 | 0.0254  | 0.1074 |
| 105 | 7  | 1 | 0.04478 | 0.01787 | 0.02048 | 0.0979 |

|     |   |   |         |         |         |        |
|-----|---|---|---------|---------|---------|--------|
| 107 | 6 | 1 | 0.03731 | 0.01637 | 0.01579 | 0.0882 |
| 108 | 5 | 1 | 0.02985 | 0.0147  | 0.01137 | 0.0784 |
| 152 | 4 | 1 | 0.02239 | 0.01278 | 0.00731 | 0.0685 |
| 153 | 3 | 1 | 0.01493 | 0.01047 | 0.00377 | 0.0591 |
| 154 | 2 | 1 | 0.00746 | 0.00743 | 0.00106 | 0.0526 |
| 155 | 1 | 1 | 0       | NaN     | NA      | NA     |

**Table S21.** Alasehir station Kaplan-Meier drought risk estimates according to SPI-3, 6, and 12

| Drought Risk (SPI3) |              | Drought Risk (SPI6) |              | Drought Risk (SPI12) |              |
|---------------------|--------------|---------------------|--------------|----------------------|--------------|
| Time                | Drought Risk | Time                | Drought Risk | Time                 | Drought Risk |
| 1                   | 0.0679       | 1                   | 0.04895      | 1                    | 0.02239      |
| 2                   | 0.08642      | 2                   | 0.0979       | 2                    | 0.04478      |
| 3                   | 0.14198      | 3                   | 0.12587      | 3                    | 0.06716      |
| 4                   | 0.19753      | 4                   | 0.16084      | 4                    | 0.08209      |
| 5                   | 0.27778      | 5                   | 0.18881      | 5                    | 0.10448      |
| 6                   | 0.34568      | 6                   | 0.22378      | 6                    | 0.11194      |
| 7                   | 0.42593      | 7                   | 0.28671      | 7                    | 0.1194       |
| 8                   | 0.48765      | 8                   | 0.32867      | 8                    | 0.14179      |
| 9                   | 0.52469      | 9                   | 0.37762      | 9                    | 0.16418      |
| 10                  | 0.55556      | 10                  | 0.43357      | 10                   | 0.1791       |
| 11                  | 0.59259      | 11                  | 0.46853      | 11                   | 0.18657      |
| 12                  | 0.62346      | 12                  | 0.4965       | 12                   | 0.20896      |
| 13                  | 0.64198      | 13                  | 0.51748      | 13                   | 0.23881      |
| 14                  | 0.64815      | 14                  | 0.53846      | 14                   | 0.26119      |
| 15                  | 0.67284      | 15                  | 0.58042      | 15                   | 0.28358      |
| 16                  | 0.69753      | 16                  | 0.61538      | 16                   | 0.30597      |
| 17                  | 0.71605      | 17                  | 0.62937      | 17                   | 0.32836      |
| 18                  | 0.75309      | 18                  | 0.64336      | 18                   | 0.34328      |
| 19                  | 0.77778      | 19                  | 0.65734      | 19                   | 0.35821      |
| 20                  | 0.80247      | 20                  | 0.67133      | 20                   | 0.37313      |
| 21                  | 0.82716      | 21                  | 0.68531      | 21                   | 0.3806       |
| 22                  | 0.84568      | 22                  | 0.70629      | 22                   | 0.38806      |
| 23                  | 0.85802      | 23                  | 0.72727      | 23                   | 0.39552      |
| 24                  | 0.88272      | 24                  | 0.75524      | 24                   | 0.41791      |
| 25                  | 0.90123      | 25                  | 0.79021      | 25                   | 0.4403       |
| 26                  | 0.91358      | 26                  | 0.8042       | 26                   | 0.45522      |
| 27                  | 0.92593      | 27                  | 0.81818      | 27                   | 0.47015      |
| 28                  | 0.93827      | 28                  | 0.83217      | 28                   | 0.48507      |
| 34                  | 0.94444      | 29                  | 0.85315      | 29                   | 0.50746      |
| 35                  | 0.95062      | 30                  | 0.86014      | 30                   | 0.52985      |
| 36                  | 0.96296      | 31                  | 0.86713      | 31                   | 0.55224      |
| 37                  | 0.98148      | 33                  | 0.88112      | 32                   | 0.56716      |
| 38                  | 0.99383      | 34                  | 0.8951       | 33                   | 0.58955      |
| 39                  | 1            | 35                  | 0.90909      | 34                   | 0.60448      |



|    |         |     |         |
|----|---------|-----|---------|
| 36 | 0.93007 | 35  | 0.61194 |
| 37 | 0.95105 | 36  | 0.6194  |
| 38 | 0.96503 | 37  | 0.62687 |
| 39 | 0.97203 | 38  | 0.63433 |
| 40 | 0.97902 | 39  | 0.64179 |
| 49 | 0.98601 | 40  | 0.64925 |
| 50 | 0.99301 | 41  | 0.65672 |
| 70 | 1       | 42  | 0.66418 |
|    |         | 43  | 0.67164 |
|    |         | 44  | 0.6791  |
|    |         | 45  | 0.68657 |
|    |         | 46  | 0.70149 |
|    |         | 47  | 0.70896 |
|    |         | 48  | 0.71642 |
|    |         | 49  | 0.73134 |
|    |         | 50  | 0.73881 |
|    |         | 51  | 0.74627 |
|    |         | 52  | 0.75373 |
|    |         | 53  | 0.76119 |
|    |         | 54  | 0.76866 |
|    |         | 55  | 0.77612 |
|    |         | 56  | 0.78358 |
|    |         | 57  | 0.79104 |
|    |         | 58  | 0.79851 |
|    |         | 82  | 0.80597 |
|    |         | 83  | 0.81343 |
|    |         | 84  | 0.8209  |
|    |         | 85  | 0.82836 |
|    |         | 86  | 0.83582 |
|    |         | 87  | 0.84328 |
|    |         | 88  | 0.85075 |
|    |         | 89  | 0.85821 |
|    |         | 90  | 0.86567 |
|    |         | 97  | 0.87313 |
|    |         | 98  | 0.8806  |
|    |         | 99  | 0.88806 |
|    |         | 100 | 0.90299 |
|    |         | 101 | 0.91791 |
|    |         | 102 | 0.93284 |
|    |         | 103 | 0.9403  |
|    |         | 104 | 0.94776 |
|    |         | 105 | 0.95522 |
|    |         | 107 | 0.96269 |
|    |         | 108 | 0.97015 |
|    |         | 152 | 0.97761 |

|     |         |
|-----|---------|
| 153 | 0.98507 |
| 154 | 0.99254 |
| 155 | 1       |

**Table S22.** Alasehir station Kaplan-Meier survival estimates according to SPEI-3

| Kaplan-Meier Wet to Dry (SPEI3) |        |         |          |         |              |              |
|---------------------------------|--------|---------|----------|---------|--------------|--------------|
|                                 |        | n       | events   | median  | 0.95LCL      | 0.95UCL      |
|                                 |        | 99      | 99       | 9       | 8            | 10           |
| time                            | n.risk | n.event | survival | std.err | lower 95% CI | upper 95% CI |
| 1                               | 99     | 3       | 0.9697   | 0.0172  | 0.93651      | 10.000       |
| 2                               | 96     | 1       | 0.9596   | 0.0198  | 0.92158      | 0.9992       |
| 3                               | 95     | 6       | 0.899    | 0.0303  | 0.84155      | 0.9604       |
| 4                               | 89     | 5       | 0.8485   | 0.036   | 0.78072      | 0.9221       |
| 5                               | 84     | 7       | 0.7778   | 0.0418  | 0.70005      | 0.8641       |
| 6                               | 77     | 8       | 0.697    | 0.0462  | 0.61207      | 0.7936       |
| 7                               | 69     | 10      | 0.596    | 0.0493  | 0.50673      | 0.7009       |
| 8                               | 59     | 8       | 0.5152   | 0.0502  | 0.42554      | 0.6236       |
| 9                               | 51     | 7       | 0.4444   | 0.0499  | 0.35659      | 0.5539       |
| 10                              | 44     | 6       | 0.3838   | 0.0489  | 0.29906      | 0.4926       |
| 11                              | 38     | 4       | 0.3434   | 0.0477  | 0.26155      | 0.451        |
| 12                              | 34     | 4       | 0.303    | 0.0462  | 0.22477      | 0.4085       |
| 13                              | 30     | 2       | 0.2828   | 0.0453  | 0.20668      | 0.387        |
| 14                              | 28     | 2       | 0.2626   | 0.0442  | 0.1888       | 0.3653       |
| 15                              | 26     | 1       | 0.2525   | 0.0437  | 0.17994      | 0.3544       |
| 18                              | 25     | 2       | 0.2323   | 0.0424  | 0.1624       | 0.3324       |
| 19                              | 23     | 1       | 0.2222   | 0.0418  | 0.15372      | 0.3212       |
| 20                              | 22     | 1       | 0.2121   | 0.0411  | 0.14511      | 0.3101       |
| 24                              | 21     | 2       | 0.1919   | 0.0396  | 0.12811      | 0.2875       |
| 25                              | 19     | 2       | 0.1717   | 0.0379  | 0.11141      | 0.2647       |
| 26                              | 17     | 2       | 0.1515   | 0.036   | 0.09506      | 0.2415       |
| 27                              | 15     | 2       | 0.1313   | 0.0339  | 0.07912      | 0.2179       |
| 28                              | 13     | 2       | 0.1111   | 0.0316  | 0.06365      | 0.194        |
| 29                              | 11     | 1       | 0.101    | 0.0303  | 0.05612      | 0.1818       |
| 30                              | 10     | 2       | 0.0808   | 0.0274  | 0.04158      | 0.157        |
| 31                              | 8      | 1       | 0.0707   | 0.0258  | 0.03462      | 0.1444       |
| 32                              | 7      | 1       | 0.0606   | 0.024   | 0.02791      | 0.1316       |
| 33                              | 6      | 1       | 0.0505   | 0.022   | 0.0215       | 0.1186       |
| 34                              | 5      | 1       | 0.0404   | 0.0198  | 0.01547      | 0.1055       |
| 43                              | 4      | 1       | 0.0303   | 0.0172  | 0.00994      | 0.0923       |
| 62                              | 3      | 1       | 0.0202   | 0.0141  | 0.00512      | 0.0796       |
| 63                              | 2      | 1       | 0.0101   | 0.01    | 0.00144      | 0.071        |
| 67                              | 1      | 1       | 0        | NaN     | NA           | NA           |

**Table S23.** Alasehir station Kaplan-Meier survival estimates according to SPEI-6

| Kaplan-Meier Wet to Dry (SPEI6) |        |         |          |         |                 |                 |
|---------------------------------|--------|---------|----------|---------|-----------------|-----------------|
|                                 |        | n       | events   | median  | 0.95LCL         | 0.95UCL         |
|                                 |        | 89      | 89       | 15      | 10              | 23              |
| time                            | n.risk | n.event | survival | std.err | lower 95%<br>CI | upper 95%<br>CI |
| 1                               | 89     | 3       | 0.9663   | 0.0191  | 0.92952         | 10.000          |
| 2                               | 86     | 5       | 0.9101   | 0.0303  | 0.85259         | 0.9715          |
| 3                               | 81     | 4       | 0.8652   | 0.0362  | 0.79704         | 0.9391          |
| 4                               | 77     | 3       | 0.8315   | 0.0397  | 0.75721         | 0.913           |
| 5                               | 74     | 2       | 0.809    | 0.0417  | 0.73131         | 0.8949          |
| 6                               | 72     | 5       | 0.7528   | 0.0457  | 0.66832         | 0.848           |
| 7                               | 67     | 3       | 0.7191   | 0.0476  | 0.63154         | 0.8188          |
| 8                               | 64     | 4       | 0.6742   | 0.0497  | 0.58349         | 0.7789          |
| 9                               | 60     | 3       | 0.6404   | 0.0509  | 0.54813         | 0.7483          |
| 10                              | 57     | 6       | 0.573    | 0.0524  | 0.47896         | 0.6856          |
| 11                              | 51     | 2       | 0.5506   | 0.0527  | 0.45634         | 0.6642          |
| 12                              | 49     | 2       | 0.5281   | 0.0529  | 0.43393         | 0.6427          |
| 13                              | 47     | 1       | 0.5169   | 0.053   | 0.4228          | 0.6318          |
| 14                              | 46     | 1       | 0.5056   | 0.053   | 0.41172         | 0.6209          |
| 15                              | 45     | 1       | 0.4944   | 0.053   | 0.4007          | 0.61            |
| 16                              | 44     | 1       | 0.4831   | 0.053   | 0.38972         | 0.599           |
| 17                              | 43     | 2       | 0.4607   | 0.0528  | 0.36793         | 0.5768          |
| 18                              | 41     | 2       | 0.4382   | 0.0526  | 0.34635         | 0.5544          |
| 19                              | 39     | 1       | 0.427    | 0.0524  | 0.33563         | 0.5432          |
| 20                              | 38     | 1       | 0.4157   | 0.0522  | 0.32497         | 0.5318          |
| 21                              | 37     | 2       | 0.3933   | 0.0518  | 0.30381         | 0.509           |
| 23                              | 35     | 1       | 0.382    | 0.0515  | 0.29331         | 0.4976          |
| 24                              | 34     | 1       | 0.3708   | 0.0512  | 0.28287         | 0.486           |
| 25                              | 33     | 1       | 0.3596   | 0.0509  | 0.27248         | 0.4744          |
| 26                              | 32     | 1       | 0.3483   | 0.0505  | 0.26215         | 0.4628          |
| 27                              | 31     | 1       | 0.3371   | 0.0501  | 0.25188         | 0.4511          |
| 28                              | 30     | 1       | 0.3258   | 0.0497  | 0.24167         | 0.4393          |
| 29                              | 29     | 1       | 0.3146   | 0.0492  | 0.23152         | 0.4275          |
| 30                              | 28     | 2       | 0.2921   | 0.0482  | 0.21141         | 0.4037          |
| 31                              | 26     | 2       | 0.2697   | 0.047   | 0.19157         | 0.3796          |
| 32                              | 24     | 1       | 0.2584   | 0.0464  | 0.18176         | 0.3674          |
| 33                              | 23     | 1       | 0.2472   | 0.0457  | 0.17202         | 0.3552          |
| 34                              | 22     | 1       | 0.236    | 0.045   | 0.16236         | 0.3429          |
| 35                              | 21     | 1       | 0.2247   | 0.0442  | 0.15277         | 0.3305          |
| 36                              | 20     | 1       | 0.2135   | 0.0434  | 0.14328         | 0.3181          |
| 37                              | 19     | 1       | 0.2022   | 0.0426  | 0.13387         | 0.3055          |
| 38                              | 18     | 1       | 0.191    | 0.0417  | 0.12456         | 0.2929          |
| 39                              | 17     | 1       | 0.1798   | 0.0407  | 0.11535         | 0.2802          |

|    |    |   |        |        |         |        |
|----|----|---|--------|--------|---------|--------|
| 40 | 16 | 1 | 0.1685 | 0.0397 | 0.10624 | 0.2674 |
| 41 | 15 | 1 | 0.1573 | 0.0386 | 0.09725 | 0.2544 |
| 42 | 14 | 1 | 0.1461 | 0.0374 | 0.08839 | 0.2414 |
| 43 | 13 | 1 | 0.1348 | 0.0362 | 0.07966 | 0.2282 |
| 46 | 12 | 1 | 0.1236 | 0.0349 | 0.07108 | 0.2149 |
| 47 | 11 | 1 | 0.1124 | 0.0335 | 0.06266 | 0.2015 |
| 48 | 10 | 1 | 0.1011 | 0.032  | 0.05443 | 0.1879 |
| 49 | 9  | 1 | 0.0899 | 0.0303 | 0.04641 | 0.1741 |
| 50 | 8  | 1 | 0.0787 | 0.0285 | 0.03863 | 0.1601 |
| 51 | 7  | 1 | 0.0674 | 0.0266 | 0.03113 | 0.146  |
| 52 | 6  | 1 | 0.0562 | 0.0244 | 0.02397 | 0.1316 |
| 62 | 5  | 1 | 0.0449 | 0.022  | 0.01725 | 0.1171 |
| 63 | 4  | 1 | 0.0337 | 0.0191 | 0.01108 | 0.1025 |
| 69 | 3  | 1 | 0.0225 | 0.0157 | 0.00571 | 0.0885 |
| 70 | 2  | 1 | 0.0112 | 0.0112 | 0.0016  | 0.0789 |
| 94 | 1  | 1 | 0      | NaN    | NA      | NA     |

**Table S24.** Alasehir station Kaplan-Meier survival estimates according to SPEI-12

| Kaplan-Meier Wet to Dry (SPEI12) |        |         |          |         |              |              |
|----------------------------------|--------|---------|----------|---------|--------------|--------------|
|                                  |        | n       | events   | median  | 0.95LCL      | 0.95UCL      |
|                                  |        | 91      | 91       | 39      | 35           | 44           |
| time                             | n.risk | n.event | survival | std.err | lower 95% CI | upper 95% CI |
| 1                                | 91     | 3       | 0.967    | 0.0187  | 0.93104      | 10.000       |
| 2                                | 88     | 4       | 0.9231   | 0.0279  | 0.86992      | 0.9795       |
| 3                                | 84     | 3       | 0.8901   | 0.0328  | 0.82812      | 0.9567       |
| 4                                | 81     | 3       | 0.8571   | 0.0367  | 0.78818      | 0.9321       |
| 5                                | 78     | 2       | 0.8352   | 0.0389  | 0.76231      | 0.915        |
| 6                                | 76     | 1       | 0.8242   | 0.0399  | 0.74956      | 0.9062       |
| 10                               | 75     | 1       | 0.8132   | 0.0409  | 0.73692      | 0.8973       |
| 11                               | 74     | 1       | 0.8022   | 0.0418  | 0.72439      | 0.8884       |
| 12                               | 73     | 3       | 0.7692   | 0.0442  | 0.68736      | 0.8609       |
| 13                               | 70     | 2       | 0.7473   | 0.0456  | 0.66309      | 0.8421       |
| 14                               | 68     | 2       | 0.7253   | 0.0468  | 0.63912      | 0.823        |
| 15                               | 66     | 2       | 0.7033   | 0.0479  | 0.61543      | 0.8037       |
| 16                               | 64     | 1       | 0.6923   | 0.0484  | 0.60369      | 0.7939       |
| 17                               | 63     | 1       | 0.6813   | 0.0488  | 0.592        | 0.7841       |
| 28                               | 62     | 1       | 0.6703   | 0.0493  | 0.58038      | 0.7742       |
| 29                               | 61     | 1       | 0.6593   | 0.0497  | 0.56882      | 0.7643       |
| 30                               | 60     | 1       | 0.6484   | 0.0501  | 0.55731      | 0.7543       |
| 31                               | 59     | 1       | 0.6374   | 0.0504  | 0.54586      | 0.7442       |
| 32                               | 58     | 1       | 0.6264   | 0.0507  | 0.53446      | 0.7341       |
| 33                               | 57     | 1       | 0.6154   | 0.051   | 0.52312      | 0.7239       |
| 34                               | 56     | 2       | 0.5934   | 0.0515  | 0.5006       | 0.7034       |

|    |    |   |        |        |         |        |
|----|----|---|--------|--------|---------|--------|
| 35 | 54 | 2 | 0.5714 | 0.0519 | 0.47828 | 0.6827 |
| 36 | 52 | 2 | 0.5495 | 0.0522 | 0.45617 | 0.6618 |
| 37 | 50 | 2 | 0.5275 | 0.0523 | 0.43426 | 0.6407 |
| 38 | 48 | 2 | 0.5055 | 0.0524 | 0.41254 | 0.6194 |
| 39 | 46 | 2 | 0.4835 | 0.0524 | 0.39101 | 0.5979 |
| 40 | 44 | 2 | 0.4615 | 0.0523 | 0.36968 | 0.5762 |
| 41 | 42 | 2 | 0.4396 | 0.052  | 0.34855 | 0.5543 |
| 42 | 40 | 2 | 0.4176 | 0.0517 | 0.32761 | 0.5323 |
| 43 | 38 | 1 | 0.4066 | 0.0515 | 0.31722 | 0.5211 |
| 44 | 37 | 2 | 0.3846 | 0.051  | 0.29659 | 0.4988 |
| 45 | 35 | 2 | 0.3626 | 0.0504 | 0.27617 | 0.4762 |
| 46 | 33 | 2 | 0.3407 | 0.0497 | 0.25597 | 0.4534 |
| 47 | 31 | 2 | 0.3187 | 0.0488 | 0.23599 | 0.4304 |
| 48 | 29 | 2 | 0.2967 | 0.0479 | 0.21624 | 0.4071 |
| 49 | 27 | 1 | 0.2857 | 0.0474 | 0.20647 | 0.3954 |
| 50 | 26 | 1 | 0.2747 | 0.0468 | 0.19675 | 0.3836 |
| 51 | 25 | 1 | 0.2637 | 0.0462 | 0.1871  | 0.3718 |
| 52 | 24 | 1 | 0.2527 | 0.0456 | 0.17752 | 0.3598 |
| 53 | 23 | 1 | 0.2418 | 0.0449 | 0.16802 | 0.3479 |
| 54 | 22 | 1 | 0.2308 | 0.0442 | 0.15859 | 0.3358 |
| 55 | 21 | 1 | 0.2198 | 0.0434 | 0.14923 | 0.3237 |
| 56 | 20 | 1 | 0.2088 | 0.0426 | 0.13996 | 0.3115 |
| 57 | 19 | 1 | 0.1978 | 0.0418 | 0.13078 | 0.2992 |
| 58 | 18 | 1 | 0.1868 | 0.0409 | 0.12169 | 0.2868 |
| 76 | 17 | 1 | 0.1758 | 0.0399 | 0.11269 | 0.2743 |
| 77 | 16 | 1 | 0.1648 | 0.0389 | 0.1038  | 0.2618 |
| 78 | 15 | 1 | 0.1538 | 0.0378 | 0.09502 | 0.2491 |
| 79 | 14 | 1 | 0.1429 | 0.0367 | 0.08636 | 0.2363 |
| 80 | 13 | 1 | 0.1319 | 0.0355 | 0.07784 | 0.2234 |
| 81 | 12 | 1 | 0.1209 | 0.0342 | 0.06946 | 0.2104 |
| 82 | 11 | 1 | 0.1099 | 0.0328 | 0.06124 | 0.1972 |
| 83 | 10 | 1 | 0.0989 | 0.0313 | 0.05319 | 0.1839 |
| 84 | 9  | 1 | 0.0879 | 0.0297 | 0.04536 | 0.1704 |
| 85 | 8  | 1 | 0.0769 | 0.0279 | 0.03775 | 0.1567 |
| 86 | 7  | 1 | 0.0659 | 0.026  | 0.03043 | 0.1429 |
| 87 | 6  | 1 | 0.0549 | 0.0239 | 0.02344 | 0.1288 |
| 88 | 5  | 1 | 0.044  | 0.0215 | 0.01686 | 0.1146 |
| 89 | 4  | 1 | 0.033  | 0.0187 | 0.01083 | 0.1003 |
| 94 | 3  | 1 | 0.022  | 0.0154 | 0.00558 | 0.0865 |
| 95 | 2  | 1 | 0.011  | 0.0109 | 0.00156 | 0.0772 |
| 98 | 1  | 1 | 0      | NaN    | NA      | NA     |

**Table S25.** Alasehir station Kaplan-Meier drought risk estimates according to SPEI-3, 6, and 12

| Drought Risk (SPEI3) | Drought Risk (SPEI6) | Drought Risk (SPEI12) |
|----------------------|----------------------|-----------------------|
|----------------------|----------------------|-----------------------|

| Time | Drought Risk | Time | Drought Risk | Time | Drought Risk |
|------|--------------|------|--------------|------|--------------|
| 1    | 0.0303       | 1    | 0.0337       | 1    | 0.033        |
| 2    | 0.0404       | 2    | 0.0899       | 2    | 0.0769       |
| 3    | 0.101        | 3    | 0.1348       | 3    | 0.1099       |
| 4    | 0.1515       | 4    | 0.1685       | 4    | 0.1429       |
| 5    | 0.2222       | 5    | 0.191        | 5    | 0.1648       |
| 6    | 0.303        | 6    | 0.2472       | 6    | 0.1758       |
| 7    | 0.404        | 7    | 0.2809       | 10   | 0.1868       |
| 8    | 0.4848       | 8    | 0.3258       | 11   | 0.1978       |
| 9    | 0.5556       | 9    | 0.3596       | 12   | 0.2308       |
| 10   | 0.6162       | 10   | 0.427        | 13   | 0.2527       |
| 11   | 0.6566       | 11   | 0.4494       | 14   | 0.2747       |
| 12   | 0.697        | 12   | 0.4719       | 15   | 0.2967       |
| 13   | 0.7172       | 13   | 0.4831       | 16   | 0.3077       |
| 14   | 0.7374       | 14   | 0.4944       | 17   | 0.3187       |
| 15   | 0.7475       | 15   | 0.5056       | 28   | 0.3297       |
| 18   | 0.7677       | 16   | 0.5169       | 29   | 0.3407       |
| 19   | 0.7778       | 17   | 0.5393       | 30   | 0.3516       |
| 20   | 0.7879       | 18   | 0.5618       | 31   | 0.3626       |
| 24   | 0.8081       | 19   | 0.573        | 32   | 0.3736       |
| 25   | 0.8283       | 20   | 0.5843       | 33   | 0.3846       |
| 26   | 0.8485       | 21   | 0.6067       | 34   | 0.4066       |
| 27   | 0.8687       | 23   | 0.618        | 35   | 0.4286       |
| 28   | 0.8889       | 24   | 0.6292       | 36   | 0.4505       |
| 29   | 0.899        | 25   | 0.6404       | 37   | 0.4725       |
| 30   | 0.9192       | 26   | 0.6517       | 38   | 0.4945       |
| 31   | 0.9293       | 27   | 0.6629       | 39   | 0.5165       |
| 32   | 0.9394       | 28   | 0.6742       | 40   | 0.5385       |
| 33   | 0.9495       | 29   | 0.6854       | 41   | 0.5604       |
| 34   | 0.9596       | 30   | 0.7079       | 42   | 0.5824       |
| 43   | 0.9697       | 31   | 0.7303       | 43   | 0.5934       |
| 62   | 0.9798       | 32   | 0.7416       | 44   | 0.6154       |
| 63   | 0.9899       | 33   | 0.7528       | 45   | 0.6374       |
| 67   | 1            | 34   | 0.764        | 46   | 0.6593       |
|      |              | 35   | 0.7753       | 47   | 0.6813       |
|      |              | 36   | 0.7865       | 48   | 0.7033       |
|      |              | 37   | 0.7978       | 49   | 0.7143       |
|      |              | 38   | 0.809        | 50   | 0.7253       |
|      |              | 39   | 0.8202       | 51   | 0.7363       |
|      |              | 40   | 0.8315       | 52   | 0.7473       |
|      |              | 41   | 0.8427       | 53   | 0.7582       |
|      |              | 42   | 0.8539       | 54   | 0.7692       |
|      |              | 43   | 0.8652       | 55   | 0.7802       |
|      |              | 46   | 0.8764       | 56   | 0.7912       |
|      |              | 47   | 0.8876       | 57   | 0.8022       |

|    |        |    |        |
|----|--------|----|--------|
| 48 | 0.8989 | 58 | 0.8132 |
| 49 | 0.9101 | 76 | 0.8242 |
| 50 | 0.9213 | 77 | 0.8352 |
| 51 | 0.9326 | 78 | 0.8462 |
| 52 | 0.9438 | 79 | 0.8571 |
| 62 | 0.9551 | 80 | 0.8681 |
| 63 | 0.9663 | 81 | 0.8791 |
| 69 | 0.9775 | 82 | 0.8901 |
| 70 | 0.9888 | 83 | 0.9011 |
| 94 | 1      | 84 | 0.9121 |
|    |        | 85 | 0.9231 |
|    |        | 86 | 0.9341 |
|    |        | 87 | 0.9451 |
|    |        | 88 | 0.956  |
|    |        | 89 | 0.967  |
|    |        | 94 | 0.978  |
|    |        | 95 | 0.989  |
|    |        | 98 | 1      |

**Table S26.** Aliaga station Kaplan-Meier survival estimates according to SPI-3

| Kaplan-Meier Wet to Dry (SPI3) |        |         |          |         |              |              |
|--------------------------------|--------|---------|----------|---------|--------------|--------------|
|                                |        | n       | events   | median  | 0.95LCL      | 0.95UCL      |
|                                |        | 50      | 50       | 10.5    | 8            | 14           |
| time                           | n.risk | n.event | survival | std.err | lower 95% CL | upper 95% CL |
| 1                              | 50     | 4       | 0.92     | 0.0384  | 0.84779      | 0.998        |
| 2                              | 46     | 2       | 0.88     | 0.046   | 0.79438      | 0.975        |
| 3                              | 44     | 3       | 0.82     | 0.0543  | 0.72014      | 0.934        |
| 4                              | 41     | 5       | 0.72     | 0.0635  | 0.60571      | 0.856        |
| 5                              | 36     | 1       | 0.7      | 0.0648  | 0.58384      | 0.839        |
| 7                              | 35     | 3       | 0.64     | 0.0679  | 0.51987      | 0.788        |
| 8                              | 32     | 1       | 0.62     | 0.0686  | 0.49906      | 0.77         |
| 9                              | 31     | 3       | 0.56     | 0.0702  | 0.43801      | 0.716        |
| 10                             | 28     | 3       | 0.5      | 0.0707  | 0.37896      | 0.66         |
| 11                             | 25     | 3       | 0.44     | 0.0702  | 0.32185      | 0.602        |
| 12                             | 22     | 2       | 0.4      | 0.0693  | 0.28486      | 0.562        |
| 13                             | 20     | 2       | 0.36     | 0.0679  | 0.24877      | 0.521        |
| 14                             | 18     | 4       | 0.28     | 0.0635  | 0.17952      | 0.437        |
| 15                             | 14     | 2       | 0.24     | 0.0604  | 0.14655      | 0.393        |
| 16                             | 12     | 2       | 0.2      | 0.0566  | 0.11489      | 0.348        |
| 17                             | 10     | 1       | 0.18     | 0.0543  | 0.09962      | 0.325        |
| 18                             | 9      | 2       | 0.14     | 0.0491  | 0.07043      | 0.278        |
| 19                             | 7      | 1       | 0.12     | 0.046   | 0.05665      | 0.254        |
| 20                             | 6      | 1       | 0.1      | 0.0424  | 0.04354      | 0.23         |

|    |   |   |      |        |         |       |
|----|---|---|------|--------|---------|-------|
| 23 | 5 | 1 | 0.08 | 0.0384 | 0.03125 | 0.205 |
| 25 | 4 | 1 | 0.06 | 0.0336 | 0.02003 | 0.18  |
| 26 | 3 | 1 | 0.04 | 0.0277 | 0.01029 | 0.156 |
| 27 | 2 | 1 | 0.02 | 0.0198 | 0.00287 | 0.139 |
| 37 | 1 | 1 | 0    | NaN    | NA      | NA    |

**Table S27.** Aliaga station Kaplan-Meier survival estimates according to SPI-6

| Kaplan-Meier Wet to Dry (SPI6) |        |         |          |         |                 |                 |
|--------------------------------|--------|---------|----------|---------|-----------------|-----------------|
|                                |        | n       | events   | median  | 0.95LCL         | 0.95UCL         |
|                                |        | 51      | 51       | 14      | 10              | 19              |
| time                           | n.risk | n.event | survival | std.err | lower 95%<br>CL | upper 95%<br>CL |
| 1                              | 51     | 5       | 0.902    | 0.0416  | 0.82393         | 0.987           |
| 2                              | 46     | 3       | 0.8431   | 0.0509  | 0.74901         | 0.949           |
| 3                              | 43     | 4       | 0.7647   | 0.0594  | 0.65672         | 0.89            |
| 4                              | 39     | 3       | 0.7059   | 0.0638  | 0.59128         | 0.843           |
| 5                              | 36     | 1       | 0.6863   | 0.065   | 0.57005         | 0.826           |
| 6                              | 35     | 1       | 0.6667   | 0.066   | 0.54907         | 0.809           |
| 7                              | 34     | 1       | 0.6471   | 0.0669  | 0.52834         | 0.792           |
| 8                              | 33     | 1       | 0.6275   | 0.0677  | 0.50785         | 0.775           |
| 10                             | 32     | 1       | 0.6078   | 0.0684  | 0.48759         | 0.758           |
| 11                             | 31     | 2       | 0.5686   | 0.0694  | 0.44773         | 0.722           |
| 12                             | 29     | 1       | 0.549    | 0.0697  | 0.42812         | 0.704           |
| 13                             | 28     | 1       | 0.5294   | 0.0699  | 0.40871         | 0.686           |
| 14                             | 27     | 2       | 0.4902   | 0.07    | 0.37052         | 0.649           |
| 15                             | 25     | 1       | 0.4706   | 0.0699  | 0.35174         | 0.63            |
| 16                             | 24     | 2       | 0.4314   | 0.0694  | 0.31478         | 0.591           |
| 17                             | 22     | 2       | 0.3922   | 0.0684  | 0.27866         | 0.552           |
| 18                             | 20     | 2       | 0.3529   | 0.0669  | 0.2434          | 0.512           |
| 19                             | 18     | 3       | 0.2941   | 0.0638  | 0.19225         | 0.45            |
| 20                             | 15     | 2       | 0.2549   | 0.061   | 0.15944         | 0.408           |
| 21                             | 13     | 2       | 0.2157   | 0.0576  | 0.1278          | 0.364           |
| 22                             | 11     | 2       | 0.1765   | 0.0534  | 0.09754         | 0.319           |
| 25                             | 9      | 1       | 0.1569   | 0.0509  | 0.08302         | 0.296           |
| 26                             | 8      | 1       | 0.1373   | 0.0482  | 0.06898         | 0.273           |
| 27                             | 7      | 1       | 0.1176   | 0.0451  | 0.05548         | 0.249           |
| 28                             | 6      | 1       | 0.098    | 0.0416  | 0.04265         | 0.225           |
| 29                             | 5      | 1       | 0.0784   | 0.0376  | 0.03061         | 0.201           |
| 30                             | 4      | 1       | 0.0588   | 0.0329  | 0.01962         | 0.176           |
| 37                             | 3      | 1       | 0.0392   | 0.0272  | 0.01008         | 0.153           |
| 40                             | 2      | 1       | 0.0196   | 0.0194  | 0.00282         | 0.137           |
| 41                             | 1      | 1       | 0        | NaN     | NA              | NA              |



**Table S28.** Aliaga station Kaplan-Meier survival estimates according to SPI-12

| Kaplan-Meier Wet to Dry (SPI12) |        |         |          |         |                 |                 |
|---------------------------------|--------|---------|----------|---------|-----------------|-----------------|
|                                 |        | n       | events   | median  | 0.95LCL         | 0.95UCL         |
|                                 |        | 55      | 55       | 20      | 16              | 50              |
| time                            | n.risk | n.event | survival | std.err | lower 95%<br>CL | upper 95%<br>CL |
| 1                               | 55     | 1       | 0.9818   | 0.018   | 0.94714         | 1               |
| 2                               | 54     | 2       | 0.9455   | 0.0306  | 0.8873          | 1               |
| 3                               | 52     | 2       | 0.9091   | 0.0388  | 0.8362          | 0.988           |
| 4                               | 50     | 3       | 0.8545   | 0.0475  | 0.76627         | 0.953           |
| 5                               | 47     | 1       | 0.8364   | 0.0499  | 0.74409         | 0.94            |
| 6                               | 46     | 2       | 0.8      | 0.0539  | 0.70097         | 0.913           |
| 7                               | 44     | 2       | 0.7636   | 0.0573  | 0.65922         | 0.885           |
| 8                               | 42     | 1       | 0.7455   | 0.0587  | 0.63878         | 0.87            |
| 12                              | 41     | 1       | 0.7273   | 0.0601  | 0.6186          | 0.855           |
| 13                              | 40     | 1       | 0.7091   | 0.0612  | 0.59867         | 0.84            |
| 14                              | 39     | 1       | 0.6909   | 0.0623  | 0.57896         | 0.824           |
| 15                              | 38     | 3       | 0.6364   | 0.0649  | 0.52113         | 0.777           |
| 16                              | 35     | 2       | 0.6      | 0.0661  | 0.48355         | 0.745           |
| 17                              | 33     | 2       | 0.5636   | 0.0669  | 0.44669         | 0.711           |
| 18                              | 31     | 1       | 0.5455   | 0.0671  | 0.42853         | 0.694           |
| 19                              | 30     | 2       | 0.5091   | 0.0674  | 0.39272         | 0.66            |
| 20                              | 28     | 2       | 0.4727   | 0.0673  | 0.3576          | 0.625           |
| 21                              | 26     | 1       | 0.4545   | 0.0671  | 0.34029         | 0.607           |
| 22                              | 25     | 1       | 0.4364   | 0.0669  | 0.32315         | 0.589           |
| 23                              | 24     | 1       | 0.4182   | 0.0665  | 0.30618         | 0.571           |
| 24                              | 23     | 1       | 0.4      | 0.0661  | 0.28939         | 0.553           |
| 25                              | 22     | 1       | 0.3818   | 0.0655  | 0.27278         | 0.534           |
| 39                              | 21     | 1       | 0.3636   | 0.0649  | 0.25635         | 0.516           |
| 50                              | 20     | 1       | 0.3455   | 0.0641  | 0.24011         | 0.497           |
| 51                              | 19     | 1       | 0.3273   | 0.0633  | 0.22405         | 0.478           |
| 52                              | 18     | 1       | 0.3091   | 0.0623  | 0.2082          | 0.459           |
| 53                              | 17     | 1       | 0.2909   | 0.0612  | 0.19256         | 0.439           |
| 54                              | 16     | 1       | 0.2727   | 0.0601  | 0.17713         | 0.42            |
| 55                              | 15     | 1       | 0.2545   | 0.0587  | 0.16194         | 0.4             |
| 56                              | 14     | 1       | 0.2364   | 0.0573  | 0.14699         | 0.38            |
| 57                              | 13     | 1       | 0.2182   | 0.0557  | 0.1323          | 0.36            |
| 58                              | 12     | 1       | 0.2      | 0.0539  | 0.11789         | 0.339           |
| 59                              | 11     | 1       | 0.1818   | 0.052   | 0.10379         | 0.319           |
| 60                              | 10     | 1       | 0.1636   | 0.0499  | 0.09003         | 0.297           |
| 85                              | 9      | 1       | 0.1455   | 0.0475  | 0.07665         | 0.276           |
| 86                              | 8      | 1       | 0.1273   | 0.0449  | 0.06371         | 0.254           |
| 87                              | 7      | 1       | 0.1091   | 0.042   | 0.05126         | 0.232           |
| 88                              | 6      | 1       | 0.0909   | 0.0388  | 0.03941         | 0.21            |

|    |   |   |        |        |         |       |
|----|---|---|--------|--------|---------|-------|
| 89 | 5 | 1 | 0.0727 | 0.035  | 0.02831 | 0.187 |
| 90 | 4 | 1 | 0.0545 | 0.0306 | 0.01815 | 0.164 |
| 91 | 3 | 1 | 0.0364 | 0.0252 | 0.00933 | 0.142 |
| 92 | 2 | 1 | 0.0182 | 0.018  | 0.00261 | 0.127 |
| 93 | 1 | 1 | 0      | NaN    | NA      | NA    |

**Table S29.** Aliaga station Kaplan-Meier drought risk estimates according to SPI-3, 6, and 12

| Drought Risk (SPI3) |              | Drought Risk (SPI6) |              | Drought Risk (SPI12) |              |
|---------------------|--------------|---------------------|--------------|----------------------|--------------|
| Time                | Drought Risk | Time                | Drought Risk | Time                 | Drought Risk |
| 1                   | 0.08         | 1                   | 0.098        | 1                    | 0.0182       |
| 2                   | 0.12         | 2                   | 0.1569       | 2                    | 0.0545       |
| 3                   | 0.18         | 3                   | 0.2353       | 3                    | 0.0909       |
| 4                   | 0.28         | 4                   | 0.2941       | 4                    | 0.1455       |
| 5                   | 0.3          | 5                   | 0.3137       | 5                    | 0.1636       |
| 6                   | 0.3414       | 6                   | 0.3333       | 6                    | 0.2          |
| 7                   | 0.36         | 7                   | 0.3529       | 7                    | 0.2364       |
| 8                   | 0.38         | 8                   | 0.3725       | 8                    | 0.2545       |
| 9                   | 0.44         | 10                  | 0.3922       | 12                   | 0.2727       |
| 10                  | 0.5          | 11                  | 0.4314       | 13                   | 0.2909       |
| 11                  | 0.56         | 12                  | 0.451        | 14                   | 0.3091       |
| 12                  | 0.6          | 13                  | 0.4706       | 15                   | 0.3636       |
| 13                  | 0.64         | 14                  | 0.5098       | 16                   | 0.4          |
| 14                  | 0.72         | 15                  | 0.5294       | 17                   | 0.4364       |
| 15                  | 0.76         | 16                  | 0.5686       | 18                   | 0.4545       |
| 16                  | 0.8          | 17                  | 0.6078       | 19                   | 0.4909       |
| 17                  | 0.82         | 18                  | 0.6471       | 20                   | 0.5273       |
| 18                  | 0.86         | 19                  | 0.7059       | 21                   | 0.5455       |
| 19                  | 0.88         | 20                  | 0.7451       | 22                   | 0.5636       |
| 20                  | 0.9          | 21                  | 0.7843       | 23                   | 0.5818       |
| 23                  | 0.92         | 22                  | 0.8235       | 24                   | 0.6          |
| 25                  | 0.94         | 25                  | 0.8431       | 25                   | 0.6182       |
| 26                  | 0.96         | 26                  | 0.8627       | 39                   | 0.6364       |
| 27                  | 0.98         | 27                  | 0.8824       | 50                   | 0.6545       |
| 37                  | 1            | 28                  | 0.902        | 51                   | 0.6727       |
|                     |              | 29                  | 0.9216       | 52                   | 0.6909       |
|                     |              | 30                  | 0.9412       | 53                   | 0.7091       |
|                     |              | 37                  | 0.9608       | 54                   | 0.7273       |
|                     |              | 40                  | 0.9804       | 55                   | 0.7455       |
|                     |              | 41                  | 1            | 56                   | 0.7636       |
|                     |              |                     |              | 57                   | 0.7818       |
|                     |              |                     |              | 58                   | 0.8          |
|                     |              |                     |              | 59                   | 0.8182       |

|    |        |
|----|--------|
| 60 | 0.8364 |
| 85 | 0.8545 |
| 86 | 0.8727 |
| 87 | 0.8909 |
| 88 | 0.9091 |
| 89 | 0.9273 |
| 90 | 0.9455 |
| 91 | 0.9636 |
| 92 | 0.9818 |
| 93 | 1      |

**Table S30.** Aliaga station Kaplan-Meier survival estimates according to SPEI-3

| Kaplan-Meier Wet to Dry (SPEI3) |        |         |          |         |              |              |
|---------------------------------|--------|---------|----------|---------|--------------|--------------|
|                                 |        | n       | events   | median  | 0.95LCL      | 0.95UCL      |
|                                 |        | 58      | 58       | 8       | 6            | 11           |
| time                            | n.risk | n.event | survival | std.err | lower 95% CI | upper 95% CI |
| 1                               | 58     | 4       | 0.931    | 0.0333  | 0.86805      | 0.999        |
| 2                               | 54     | 2       | 0.8966   | 0.04    | 0.8215       | 0.978        |
| 3                               | 52     | 7       | 0.7759   | 0.0548  | 0.67563      | 0.891        |
| 4                               | 45     | 4       | 0.7069   | 0.0598  | 0.59894      | 0.834        |
| 5                               | 41     | 4       | 0.6379   | 0.0631  | 0.5255       | 0.774        |
| 6                               | 37     | 3       | 0.5862   | 0.0647  | 0.47222      | 0.728        |
| 7                               | 34     | 4       | 0.5172   | 0.0656  | 0.40338      | 0.663        |
| 8                               | 30     | 3       | 0.4655   | 0.0655  | 0.35332      | 0.613        |
| 9                               | 27     | 3       | 0.4138   | 0.0647  | 0.30462      | 0.562        |
| 10                              | 24     | 3       | 0.3621   | 0.0631  | 0.2573       | 0.51         |
| 11                              | 21     | 3       | 0.3103   | 0.0607  | 0.21146      | 0.455        |
| 12                              | 18     | 1       | 0.2931   | 0.0598  | 0.19654      | 0.437        |
| 13                              | 17     | 3       | 0.2414   | 0.0562  | 0.15295      | 0.381        |
| 14                              | 14     | 2       | 0.2069   | 0.0532  | 0.125        | 0.342        |
| 15                              | 12     | 1       | 0.1897   | 0.0515  | 0.11141      | 0.323        |
| 16                              | 11     | 2       | 0.1552   | 0.0475  | 0.08512      | 0.283        |
| 17                              | 9      | 1       | 0.1379   | 0.0453  | 0.07248      | 0.262        |
| 18                              | 8      | 3       | 0.0862   | 0.0369  | 0.0373       | 0.199        |
| 19                              | 5      | 1       | 0.069    | 0.0333  | 0.02679      | 0.178        |
| 24                              | 4      | 1       | 0.0517   | 0.0291  | 0.01718      | 0.156        |
| 25                              | 3      | 1       | 0.0345   | 0.024   | 0.00883      | 0.135        |
| 26                              | 2      | 1       | 0.0172   | 0.0171  | 0.00247      | 0.12         |
| 27                              | 1      | 1       | 0        | NaN     | NA           | NA           |

**Table S31.** Aliaga station Kaplan-Meier survival estimates according to SPEI-6

| Kaplan-Meier Wet to Dry (SPEI6) |
|---------------------------------|
|---------------------------------|

|      |        |         |          |         |                 |                 |
|------|--------|---------|----------|---------|-----------------|-----------------|
|      |        | n       | events   | median  | 0.95LCL         | 0.95UCL         |
|      |        | 63      | 63       | 12      | 6               | 16              |
| time | n.risk | n.event | survival | std.err | lower 95%<br>CI | upper 95%<br>CI |
| 1    | 63     | 6       | 0.9048   | 0.037   | 0.8351          | 0.98            |
| 2    | 57     | 5       | 0.8254   | 0.0478  | 0.73678         | 0.925           |
| 3    | 52     | 4       | 0.7619   | 0.0537  | 0.66367         | 0.875           |
| 4    | 48     | 5       | 0.6825   | 0.0586  | 0.57675         | 0.808           |
| 5    | 43     | 2       | 0.6508   | 0.0601  | 0.54311         | 0.78            |
| 6    | 41     | 3       | 0.6032   | 0.0616  | 0.4937          | 0.737           |
| 7    | 38     | 2       | 0.5714   | 0.0623  | 0.46141         | 0.708           |
| 8    | 36     | 1       | 0.5556   | 0.0626  | 0.44546         | 0.693           |
| 10   | 35     | 1       | 0.5397   | 0.0628  | 0.42963         | 0.678           |
| 11   | 34     | 1       | 0.5238   | 0.0629  | 0.41393         | 0.663           |
| 12   | 33     | 2       | 0.4921   | 0.063   | 0.38288         | 0.632           |
| 13   | 31     | 2       | 0.4603   | 0.0628  | 0.35232         | 0.601           |
| 14   | 29     | 3       | 0.4127   | 0.062   | 0.3074          | 0.554           |
| 15   | 26     | 2       | 0.381    | 0.0612  | 0.27808         | 0.522           |
| 16   | 24     | 3       | 0.3333   | 0.0594  | 0.23508         | 0.473           |
| 17   | 21     | 2       | 0.3016   | 0.0578  | 0.20712         | 0.439           |
| 18   | 19     | 2       | 0.2698   | 0.0559  | 0.17976         | 0.405           |
| 19   | 17     | 2       | 0.2381   | 0.0537  | 0.15308         | 0.37            |
| 20   | 15     | 1       | 0.2222   | 0.0524  | 0.14001         | 0.353           |
| 21   | 14     | 1       | 0.2063   | 0.051   | 0.12714         | 0.335           |
| 22   | 13     | 1       | 0.1905   | 0.0495  | 0.11449         | 0.317           |
| 23   | 12     | 1       | 0.1746   | 0.0478  | 0.10207         | 0.299           |
| 24   | 11     | 1       | 0.1587   | 0.046   | 0.0899          | 0.28            |
| 25   | 10     | 1       | 0.1429   | 0.0441  | 0.07802         | 0.262           |
| 26   | 9      | 1       | 0.127    | 0.0419  | 0.06646         | 0.243           |
| 27   | 8      | 1       | 0.1111   | 0.0396  | 0.05526         | 0.223           |
| 28   | 7      | 1       | 0.0952   | 0.037   | 0.04449         | 0.204           |
| 29   | 6      | 1       | 0.0794   | 0.0341  | 0.03423         | 0.184           |
| 30   | 5      | 1       | 0.0635   | 0.0307  | 0.0246          | 0.164           |
| 31   | 4      | 1       | 0.0476   | 0.0268  | 0.01578         | 0.144           |
| 64   | 3      | 1       | 0.0317   | 0.0221  | 0.00812         | 0.124           |
| 65   | 2      | 1       | 0.0159   | 0.0157  | 0.00227         | 0.111           |
| 66   | 1      | 1       | 0        | NaN     | NA              | NA              |

**Table S32.** Aliaga station Kaplan-Meier survival estimates according to SPEI-12

| Kaplan-Meier Wet to Dry (SPEI12) |        |         |          |         |              |                 |
|----------------------------------|--------|---------|----------|---------|--------------|-----------------|
|                                  |        | n       | events   | median  | 0.95LCL      | 0.95UCL         |
|                                  |        | 61      | 61       | 15      | 12           | 21              |
| time                             | n.risk | n.event | survival | std.err | lower 95% CI | upper 95%<br>CI |

|    |    |   |        |        |         |       |
|----|----|---|--------|--------|---------|-------|
| 1  | 61 | 3 | 0.9508 | 0.0277 | 0.89807 | 1.000 |
| 2  | 58 | 3 | 0.9016 | 0.0381 | 0.82992 | 0.98  |
| 3  | 55 | 3 | 0.8525 | 0.0454 | 0.76795 | 0.946 |
| 4  | 52 | 1 | 0.8361 | 0.0474 | 0.74814 | 0.934 |
| 5  | 51 | 3 | 0.7869 | 0.0524 | 0.69055 | 0.897 |
| 6  | 48 | 3 | 0.7377 | 0.0563 | 0.63518 | 0.857 |
| 7  | 45 | 2 | 0.7049 | 0.0584 | 0.59927 | 0.829 |
| 8  | 43 | 2 | 0.6721 | 0.0601 | 0.56407 | 0.801 |
| 9  | 41 | 1 | 0.6557 | 0.0608 | 0.54672 | 0.786 |
| 10 | 40 | 1 | 0.6393 | 0.0615 | 0.52952 | 0.772 |
| 11 | 39 | 1 | 0.623  | 0.0621 | 0.51247 | 0.757 |
| 12 | 38 | 3 | 0.5738 | 0.0633 | 0.46217 | 0.712 |
| 13 | 35 | 1 | 0.5574 | 0.0636 | 0.44569 | 0.697 |
| 14 | 34 | 2 | 0.5246 | 0.0639 | 0.41311 | 0.666 |
| 15 | 32 | 2 | 0.4918 | 0.064  | 0.38107 | 0.635 |
| 16 | 30 | 2 | 0.459  | 0.0638 | 0.34955 | 0.603 |
| 17 | 28 | 2 | 0.4262 | 0.0633 | 0.31856 | 0.57  |
| 18 | 26 | 1 | 0.4098 | 0.063  | 0.30327 | 0.554 |
| 19 | 25 | 1 | 0.3934 | 0.0625 | 0.28811 | 0.537 |
| 20 | 24 | 2 | 0.3607 | 0.0615 | 0.25822 | 0.504 |
| 21 | 22 | 3 | 0.3115 | 0.0593 | 0.21448 | 0.452 |
| 63 | 19 | 1 | 0.2951 | 0.0584 | 0.20021 | 0.435 |
| 64 | 18 | 1 | 0.2787 | 0.0574 | 0.18612 | 0.417 |
| 65 | 17 | 1 | 0.2623 | 0.0563 | 0.17219 | 0.4   |
| 66 | 16 | 1 | 0.2459 | 0.0551 | 0.15846 | 0.382 |
| 67 | 15 | 1 | 0.2295 | 0.0538 | 0.14491 | 0.363 |
| 68 | 14 | 1 | 0.2131 | 0.0524 | 0.13158 | 0.345 |
| 69 | 13 | 1 | 0.1967 | 0.0509 | 0.11847 | 0.327 |
| 70 | 12 | 1 | 0.1803 | 0.0492 | 0.10561 | 0.308 |
| 71 | 11 | 1 | 0.1639 | 0.0474 | 0.09301 | 0.289 |
| 72 | 10 | 1 | 0.1475 | 0.0454 | 0.08071 | 0.27  |
| 73 | 9  | 1 | 0.1311 | 0.0432 | 0.06875 | 0.25  |
| 74 | 8  | 1 | 0.1148 | 0.0408 | 0.05716 | 0.23  |
| 90 | 7  | 1 | 0.0984 | 0.0381 | 0.04601 | 0.21  |
| 91 | 6  | 1 | 0.082  | 0.0351 | 0.03539 | 0.19  |
| 92 | 5  | 1 | 0.0656 | 0.0317 | 0.02543 | 0.169 |
| 93 | 4  | 1 | 0.0492 | 0.0277 | 0.01631 | 0.148 |
| 94 | 3  | 1 | 0.0328 | 0.0228 | 0.00839 | 0.128 |
| 95 | 2  | 1 | 0.0164 | 0.0163 | 0.00235 | 0.115 |
| 96 | 1  | 1 | 0      | NaN    | NA      | NA    |

**Table S33.** Aliaga station Kaplan-Meier drought risk estimates according to SPEI-3, 6, and 12

| Drought Risk (SPEI3) |              | Drought Risk (SPEI6) |              | Drought Risk (SPEI12) |              |
|----------------------|--------------|----------------------|--------------|-----------------------|--------------|
| Time                 | Drought Risk | Time                 | Drought Risk | Time                  | Drought Risk |
| 1                    | 0.069        | 1                    | 0.0952       | 1                     | 0.0492       |

|    |        |    |        |    |        |
|----|--------|----|--------|----|--------|
| 2  | 0.1034 | 2  | 0.1746 | 2  | 0.0984 |
| 3  | 0.2241 | 3  | 0.2381 | 3  | 0.1475 |
| 4  | 0.2931 | 4  | 0.3175 | 4  | 0.1639 |
| 5  | 0.3621 | 5  | 0.3492 | 5  | 0.2131 |
| 6  | 0.4138 | 6  | 0.3968 | 6  | 0.2623 |
| 7  | 0.4828 | 7  | 0.4286 | 7  | 0.2951 |
| 8  | 0.5345 | 8  | 0.4444 | 8  | 0.3279 |
| 9  | 0.5862 | 10 | 0.4603 | 9  | 0.3443 |
| 10 | 0.6379 | 11 | 0.4762 | 10 | 0.3607 |
| 11 | 0.6897 | 12 | 0.5079 | 11 | 0.377  |
| 12 | 0.7069 | 13 | 0.5397 | 12 | 0.4262 |
| 13 | 0.7586 | 14 | 0.5873 | 13 | 0.4426 |
| 14 | 0.7931 | 15 | 0.619  | 14 | 0.4754 |
| 15 | 0.8103 | 16 | 0.6667 | 15 | 0.5082 |
| 16 | 0.8448 | 17 | 0.6984 | 16 | 0.541  |
| 17 | 0.8621 | 18 | 0.7302 | 17 | 0.5738 |
| 18 | 0.9138 | 19 | 0.7619 | 18 | 0.5902 |
| 19 | 0.931  | 20 | 0.7778 | 19 | 0.6066 |
| 24 | 0.9483 | 21 | 0.7937 | 20 | 0.6393 |
| 25 | 0.9655 | 22 | 0.8095 | 21 | 0.6885 |
| 26 | 0.9828 | 23 | 0.8254 | 63 | 0.7049 |
| 27 | 1      | 24 | 0.8413 | 64 | 0.7213 |
|    |        | 25 | 0.8571 | 65 | 0.7377 |
|    |        | 26 | 0.873  | 66 | 0.7541 |
|    |        | 27 | 0.8889 | 67 | 0.7705 |
|    |        | 28 | 0.9048 | 68 | 0.7869 |
|    |        | 29 | 0.9206 | 69 | 0.8033 |
|    |        | 30 | 0.9365 | 70 | 0.8197 |
|    |        | 31 | 0.9524 | 71 | 0.8361 |
|    |        | 64 | 0.9683 | 72 | 0.8525 |
|    |        | 65 | 0.9841 | 73 | 0.8689 |
|    |        | 66 | 1      | 74 | 0.8852 |
|    |        |    |        | 90 | 0.9016 |
|    |        |    |        | 91 | 0.918  |
|    |        |    |        | 92 | 0.9344 |
|    |        |    |        | 93 | 0.9508 |
|    |        |    |        | 94 | 0.9672 |
|    |        |    |        | 95 | 0.9836 |
|    |        |    |        | 96 | 1      |

**Table S34.** Bornova station Kaplan-Meier survival estimates according to SPI-3

| Kaplan-Meier Wet to Dry (SPI3) |  |    |        |        |         |         |
|--------------------------------|--|----|--------|--------|---------|---------|
|                                |  | n  | events | median | 0.95LCL | 0.95UCL |
|                                |  | 74 | 74     | 8      | 6       | 10      |

| time | n.risk | n.event | survival | std.err | lower 95%<br>CL | upper 95%<br>CL |
|------|--------|---------|----------|---------|-----------------|-----------------|
| 1    | 74     | 5       | 0.9324   | 0.0292  | 0.87696         | 0.9914          |
| 2    | 69     | 5       | 0.8649   | 0.0397  | 0.79038         | 0.9464          |
| 3    | 64     | 5       | 0.7973   | 0.0467  | 0.71077         | 0.8944          |
| 4    | 59     | 5       | 0.7297   | 0.0516  | 0.63525         | 0.8383          |
| 5    | 54     | 5       | 0.6622   | 0.055   | 0.56271         | 0.7792          |
| 6    | 49     | 5       | 0.5946   | 0.0571  | 0.49262         | 0.7177          |
| 7    | 44     | 6       | 0.5135   | 0.0581  | 0.41138         | 0.641           |
| 8    | 38     | 6       | 0.4324   | 0.0576  | 0.33309         | 0.5614          |
| 9    | 32     | 3       | 0.3919   | 0.0567  | 0.29506         | 0.5205          |
| 10   | 29     | 2       | 0.3649   | 0.056   | 0.27013         | 0.4928          |
| 11   | 27     | 3       | 0.3243   | 0.0544  | 0.23343         | 0.4506          |
| 12   | 24     | 2       | 0.2973   | 0.0531  | 0.20944         | 0.422           |
| 13   | 22     | 2       | 0.2703   | 0.0516  | 0.18587         | 0.393           |
| 14   | 20     | 1       | 0.2568   | 0.0508  | 0.17425         | 0.3783          |
| 15   | 19     | 3       | 0.2162   | 0.0479  | 0.14012         | 0.3336          |
| 16   | 16     | 2       | 0.1892   | 0.0455  | 0.11805         | 0.3032          |
| 17   | 14     | 2       | 0.1622   | 0.0428  | 0.09661         | 0.2722          |
| 18   | 12     | 2       | 0.1351   | 0.0397  | 0.07593         | 0.2405          |
| 20   | 10     | 1       | 0.1216   | 0.038   | 0.06593         | 0.2244          |
| 21   | 9      | 2       | 0.0946   | 0.034   | 0.04675         | 0.1914          |
| 22   | 7      | 1       | 0.0811   | 0.0317  | 0.03765         | 0.1746          |
| 23   | 6      | 1       | 0.0676   | 0.0292  | 0.02898         | 0.1575          |
| 26   | 5      | 1       | 0.0541   | 0.0263  | 0.02084         | 0.1402          |
| 27   | 4      | 1       | 0.0405   | 0.0229  | 0.01338         | 0.1228          |
| 28   | 3      | 1       | 0.027    | 0.0189  | 0.00689         | 0.106           |
| 37   | 2      | 1       | 0.0135   | 0.0134  | 0.00193         | 0.0947          |
| 38   | 1      | 1       | 0        | NaN     | NA              | NA              |

**Table S35.** Bornova station Kaplan-Meier survival estimates according to SPI-6

| Kaplan-Meier Wet to Dry (SPI6) |        |         |          |         |                 |                 |
|--------------------------------|--------|---------|----------|---------|-----------------|-----------------|
|                                |        | n       | events   | median  | 0.95LCL         | 0.95UCL         |
|                                |        | 85      | 85       | 11      | 8               | 14              |
| time                           | n.risk | n.event | survival | std.err | lower 95%<br>CL | upper 95%<br>CL |
| 1                              | 85     | 6       | 0.9294   | 0.0278  | 0.87652         | 0.9855          |
| 2                              | 79     | 8       | 0.8353   | 0.0402  | 0.76005         | 0.918           |
| 3                              | 71     | 2       | 0.8118   | 0.0424  | 0.73278         | 0.8993          |
| 4                              | 69     | 2       | 0.7882   | 0.0443  | 0.70599         | 0.8801          |
| 5                              | 67     | 4       | 0.7412   | 0.0475  | 0.65368         | 0.8404          |
| 6                              | 63     | 5       | 0.6824   | 0.0505  | 0.59022         | 0.7889          |
| 7                              | 58     | 5       | 0.6235   | 0.0526  | 0.52859         | 0.7355          |
| 8                              | 53     | 4       | 0.5765   | 0.0536  | 0.48044         | 0.6917          |

|    |    |   |        |        |         |        |
|----|----|---|--------|--------|---------|--------|
| 9  | 49 | 2 | 0.5529 | 0.0539 | 0.45673 | 0.6694 |
| 10 | 47 | 4 | 0.5059 | 0.0542 | 0.41002 | 0.6242 |
| 11 | 43 | 3 | 0.4706 | 0.0541 | 0.37559 | 0.5896 |
| 12 | 40 | 2 | 0.4471 | 0.0539 | 0.35293 | 0.5663 |
| 13 | 38 | 3 | 0.4118 | 0.0534 | 0.31937 | 0.5309 |
| 14 | 35 | 3 | 0.3765 | 0.0526 | 0.28636 | 0.4949 |
| 15 | 32 | 2 | 0.3529 | 0.0518 | 0.26466 | 0.4707 |
| 16 | 30 | 3 | 0.3176 | 0.0505 | 0.23261 | 0.4338 |
| 17 | 27 | 2 | 0.2941 | 0.0494 | 0.21159 | 0.4088 |
| 18 | 25 | 3 | 0.2588 | 0.0475 | 0.18062 | 0.3709 |
| 19 | 22 | 2 | 0.2353 | 0.046  | 0.16039 | 0.3452 |
| 20 | 20 | 2 | 0.2118 | 0.0443 | 0.14052 | 0.3191 |
| 21 | 18 | 1 | 0.2    | 0.0434 | 0.13073 | 0.306  |
| 27 | 17 | 1 | 0.1882 | 0.0424 | 0.12105 | 0.2927 |
| 36 | 16 | 1 | 0.1765 | 0.0413 | 0.11149 | 0.2793 |
| 37 | 15 | 1 | 0.1647 | 0.0402 | 0.10205 | 0.2658 |
| 38 | 14 | 2 | 0.1412 | 0.0378 | 0.08357 | 0.2385 |
| 39 | 12 | 1 | 0.1294 | 0.0364 | 0.07456 | 0.2246 |
| 40 | 11 | 1 | 0.1176 | 0.0349 | 0.06573 | 0.2106 |
| 41 | 10 | 2 | 0.0941 | 0.0317 | 0.04867 | 0.182  |
| 42 | 8  | 2 | 0.0706 | 0.0278 | 0.03264 | 0.1527 |
| 43 | 6  | 1 | 0.0588 | 0.0255 | 0.02513 | 0.1377 |
| 44 | 5  | 1 | 0.0471 | 0.023  | 0.01808 | 0.1225 |
| 45 | 4  | 2 | 0.0235 | 0.0164 | 0.00598 | 0.0926 |
| 46 | 2  | 1 | 0.0118 | 0.0117 | 0.00168 | 0.0826 |
| 47 | 1  | 1 | 0      | NaN    | NA      | NA     |

**Table S36.** Bornova station Kaplan-Meier survival estimates according to SPI-12

| Kaplan-Meier Wet to Dry (SPI12) |        |         |          |         |                 |                 |
|---------------------------------|--------|---------|----------|---------|-----------------|-----------------|
|                                 |        | n       | events   | median  | 0.95LCL         | 0.95UCL         |
|                                 |        | 79      | 79       | 15      | 11              | 21              |
| time                            | n.risk | n.event | survival | std.err | lower 95%<br>CL | upper 95%<br>CL |
| 1                               | 79     | 4       | 0.9494   | 0.0247  | 0.90223         | 0.999           |
| 2                               | 75     | 5       | 0.8861   | 0.0357  | 0.81871         | 0.959           |
| 3                               | 70     | 3       | 0.8481   | 0.0404  | 0.77253         | 0.9311          |
| 4                               | 67     | 3       | 0.8101   | 0.0441  | 0.7281          | 0.9014          |
| 5                               | 64     | 2       | 0.7848   | 0.0462  | 0.69923         | 0.8809          |
| 6                               | 62     | 1       | 0.7722   | 0.0472  | 0.68498         | 0.8704          |
| 7                               | 61     | 2       | 0.7468   | 0.0489  | 0.65685         | 0.8491          |
| 8                               | 59     | 4       | 0.6962   | 0.0517  | 0.60183         | 0.8054          |
| 9                               | 55     | 4       | 0.6456   | 0.0538  | 0.54826         | 0.7602          |
| 10                              | 51     | 2       | 0.6203   | 0.0546  | 0.52196         | 0.7371          |
| 11                              | 49     | 3       | 0.5823   | 0.0555  | 0.48308         | 0.7019          |



|     |    |   |        |        |         |        |
|-----|----|---|--------|--------|---------|--------|
| 12  | 46 | 2 | 0.557  | 0.0559 | 0.45752 | 0.678  |
| 13  | 44 | 2 | 0.5316 | 0.0561 | 0.43225 | 0.6539 |
| 14  | 42 | 2 | 0.5063 | 0.0562 | 0.40726 | 0.6295 |
| 15  | 40 | 1 | 0.4937 | 0.0562 | 0.39487 | 0.6172 |
| 16  | 39 | 1 | 0.481  | 0.0562 | 0.38254 | 0.6048 |
| 17  | 38 | 2 | 0.4557 | 0.056  | 0.3581  | 0.5799 |
| 18  | 36 | 2 | 0.4304 | 0.0557 | 0.33395 | 0.5547 |
| 19  | 34 | 2 | 0.4051 | 0.0552 | 0.31007 | 0.5292 |
| 20  | 32 | 2 | 0.3797 | 0.0546 | 0.28648 | 0.5034 |
| 21  | 30 | 1 | 0.3671 | 0.0542 | 0.2748  | 0.4904 |
| 22  | 29 | 1 | 0.3544 | 0.0538 | 0.2632  | 0.4773 |
| 36  | 28 | 2 | 0.3291 | 0.0529 | 0.24022 | 0.4509 |
| 37  | 26 | 2 | 0.3038 | 0.0517 | 0.21757 | 0.4242 |
| 38  | 24 | 1 | 0.2911 | 0.0511 | 0.20638 | 0.4107 |
| 39  | 23 | 1 | 0.2785 | 0.0504 | 0.19527 | 0.3971 |
| 40  | 22 | 2 | 0.2532 | 0.0489 | 0.17335 | 0.3697 |
| 41  | 20 | 3 | 0.2152 | 0.0462 | 0.14123 | 0.3279 |
| 42  | 17 | 3 | 0.1772 | 0.043  | 0.11019 | 0.285  |
| 43  | 14 | 2 | 0.1519 | 0.0404 | 0.09021 | 0.2558 |
| 44  | 12 | 2 | 0.1266 | 0.0374 | 0.07093 | 0.2259 |
| 45  | 10 | 2 | 0.1013 | 0.0339 | 0.0525  | 0.1953 |
| 46  | 8  | 1 | 0.0886 | 0.032  | 0.04368 | 0.1797 |
| 47  | 7  | 1 | 0.0759 | 0.0298 | 0.03519 | 0.1639 |
| 48  | 6  | 1 | 0.0633 | 0.0274 | 0.0271  | 0.1478 |
| 49  | 5  | 1 | 0.0506 | 0.0247 | 0.01949 | 0.1316 |
| 50  | 4  | 2 | 0.0253 | 0.0177 | 0.00644 | 0.0995 |
| 51  | 2  | 1 | 0.0127 | 0.0126 | 0.00181 | 0.0888 |
| 118 | 1  | 1 | 0      | NaN    | NA      | NA     |

**Table S37.** Bornova station Kaplan-Meier drought risk estimates according to SPI-3, 6, and 12

| Drought Risk (SPI3) |              | Drought Risk (SPI6) |              | Drought Risk (SPI12) |              |
|---------------------|--------------|---------------------|--------------|----------------------|--------------|
| Time                | Drought Risk | Time                | Drought Risk | Time                 | Drought Risk |
| 1                   | 0.0676       | 1                   | 0.0706       | 1                    | 0.0506       |
| 2                   | 0.1351       | 2                   | 0.1647       | 2                    | 0.1139       |
| 3                   | 0.2027       | 3                   | 0.1882       | 3                    | 0.1519       |
| 4                   | 0.2703       | 4                   | 0.2118       | 4                    | 0.1899       |
| 5                   | 0.3378       | 5                   | 0.2588       | 5                    | 0.2152       |
| 6                   | 0.4054       | 6                   | 0.3176       | 6                    | 0.2278       |
| 7                   | 0.4865       | 7                   | 0.3765       | 7                    | 0.2532       |
| 8                   | 0.5676       | 8                   | 0.4235       | 8                    | 0.3038       |
| 9                   | 0.6081       | 9                   | 0.4471       | 9                    | 0.3544       |
| 10                  | 0.6351       | 10                  | 0.4941       | 10                   | 0.3797       |
| 11                  | 0.6757       | 11                  | 0.5294       | 11                   | 0.4177       |
| 12                  | 0.7027       | 12                  | 0.5529       | 12                   | 0.443        |

|    |        |    |        |     |        |
|----|--------|----|--------|-----|--------|
| 13 | 0.7297 | 13 | 0.5882 | 13  | 0.4684 |
| 14 | 0.7432 | 14 | 0.6235 | 14  | 0.4937 |
| 15 | 0.7838 | 15 | 0.6471 | 15  | 0.5063 |
| 16 | 0.8108 | 16 | 0.6824 | 16  | 0.519  |
| 17 | 0.8378 | 17 | 0.7059 | 17  | 0.5443 |
| 18 | 0.8649 | 18 | 0.7412 | 18  | 0.5696 |
| 20 | 0.8784 | 19 | 0.7647 | 19  | 0.5949 |
| 21 | 0.9054 | 20 | 0.7882 | 20  | 0.6203 |
| 22 | 0.9189 | 21 | 0.8    | 21  | 0.6329 |
| 23 | 0.9324 | 27 | 0.8118 | 22  | 0.6456 |
| 26 | 0.9459 | 36 | 0.8235 | 36  | 0.6709 |
| 27 | 0.9595 | 37 | 0.8353 | 37  | 0.6962 |
| 28 | 0.973  | 38 | 0.8588 | 38  | 0.7089 |
| 37 | 0.9865 | 39 | 0.8706 | 39  | 0.7215 |
| 38 | 1      | 40 | 0.8824 | 40  | 0.7468 |
|    |        | 41 | 0.9059 | 41  | 0.7848 |
|    |        | 42 | 0.9294 | 42  | 0.8228 |
|    |        | 43 | 0.9412 | 43  | 0.8481 |
|    |        | 44 | 0.9529 | 44  | 0.8734 |
|    |        | 45 | 0.9765 | 45  | 0.8987 |
|    |        | 46 | 0.9882 | 46  | 0.9114 |
|    |        | 47 | 1      | 47  | 0.9241 |
|    |        |    |        | 48  | 0.9367 |
|    |        |    |        | 49  | 0.9494 |
|    |        |    |        | 50  | 0.9747 |
|    |        |    |        | 51  | 0.9873 |
|    |        |    |        | 118 | 1      |

**Table S38.** Bornova station Kaplan-Meier survival estimates according to SPEI-3

| Kaplan-Meier Wet to Dry (SPEI3) |        |         |          |         |              |              |
|---------------------------------|--------|---------|----------|---------|--------------|--------------|
|                                 |        | n       | events   | median  | 0.95LCL      | 0.95UCL      |
|                                 |        | 94      | 94       | 8       | 6            | 10           |
| time                            | n.risk | n.event | survival | std.err | lower 95% CI | upper 95% CI |
| 1                               | 94     | 7       | 0.9255   | 0.0271  | 0.87395      | 0.9802       |
| 2                               | 87     | 3       | 0.8936   | 0.0318  | 0.83341      | 0.9582       |
| 3                               | 84     | 6       | 0.8298   | 0.0388  | 0.75719      | 0.9093       |
| 4                               | 78     | 8       | 0.7447   | 0.045   | 0.66155      | 0.8383       |
| 5                               | 70     | 9       | 0.6489   | 0.0492  | 0.55928      | 0.753        |
| 6                               | 61     | 6       | 0.5851   | 0.0508  | 0.49352      | 0.6937       |
| 7                               | 55     | 7       | 0.5106   | 0.0516  | 0.41895      | 0.6224       |
| 8                               | 48     | 6       | 0.4468   | 0.0513  | 0.35681      | 0.5595       |
| 9                               | 42     | 4       | 0.4043   | 0.0506  | 0.31628      | 0.5167       |
| 10                              | 38     | 5       | 0.3511   | 0.0492  | 0.2667       | 0.4621       |

|    |    |   |        |        |         |        |
|----|----|---|--------|--------|---------|--------|
| 11 | 33 | 6 | 0.2872 | 0.0467 | 0.2089  | 0.3949 |
| 12 | 27 | 2 | 0.266  | 0.0456 | 0.19009 | 0.3721 |
| 13 | 25 | 4 | 0.2234 | 0.043  | 0.15325 | 0.3257 |
| 14 | 21 | 2 | 0.2021 | 0.0414 | 0.13527 | 0.302  |
| 15 | 19 | 3 | 0.1702 | 0.0388 | 0.10893 | 0.266  |
| 16 | 16 | 3 | 0.1383 | 0.0356 | 0.0835  | 0.2291 |
| 17 | 13 | 1 | 0.1277 | 0.0344 | 0.07526 | 0.2165 |
| 18 | 12 | 2 | 0.1064 | 0.0318 | 0.05921 | 0.1911 |
| 19 | 10 | 1 | 0.0957 | 0.0303 | 0.05144 | 0.1782 |
| 21 | 9  | 1 | 0.0851 | 0.0288 | 0.04386 | 0.1651 |
| 25 | 8  | 1 | 0.0745 | 0.0271 | 0.03651 | 0.1519 |
| 26 | 7  | 2 | 0.0532 | 0.0231 | 0.02267 | 0.1248 |
| 27 | 5  | 1 | 0.0426 | 0.0208 | 0.01631 | 0.111  |
| 30 | 4  | 1 | 0.0319 | 0.0181 | 0.01048 | 0.0972 |
| 31 | 3  | 1 | 0.0213 | 0.0149 | 0.0054  | 0.0838 |
| 36 | 2  | 1 | 0.0106 | 0.0106 | 0.00151 | 0.0747 |
| 37 | 1  | 1 | 0      | NaN    | NA      | NA     |

**Table S39.** Bornova station Kaplan-Meier survival estimates according to SPEI-6

| Kaplan-Meier Wet to Dry (SPEI6) |        |         |          |         |                 |                 |
|---------------------------------|--------|---------|----------|---------|-----------------|-----------------|
|                                 |        | n       | events   | median  | 0.95LCL         | 0.95UCL         |
|                                 |        | 97      | 97       | 8       | 7               | 11              |
| time                            | n.risk | n.event | survival | std.err | lower 95%<br>CI | upper 95%<br>CI |
| 1                               | 97     | 8       | 0.9175   | 0.0279  | 0.86438         | 0.9739          |
| 2                               | 89     | 9       | 0.8247   | 0.0386  | 0.75245         | 0.904           |
| 3                               | 80     | 9       | 0.732    | 0.045   | 0.64891         | 0.8256          |
| 4                               | 71     | 4       | 0.6907   | 0.0469  | 0.6046          | 0.7891          |
| 5                               | 67     | 3       | 0.6598   | 0.0481  | 0.57194         | 0.7611          |
| 6                               | 64     | 6       | 0.5979   | 0.0498  | 0.50791         | 0.7039          |
| 7                               | 58     | 5       | 0.5464   | 0.0505  | 0.45578         | 0.655           |
| 8                               | 53     | 5       | 0.4948   | 0.0508  | 0.40471         | 0.6051          |
| 9                               | 48     | 4       | 0.4536   | 0.0505  | 0.36461         | 0.5643          |
| 10                              | 44     | 4       | 0.4124   | 0.05    | 0.32518         | 0.5229          |
| 11                              | 40     | 5       | 0.3608   | 0.0488  | 0.27686         | 0.4702          |
| 12                              | 35     | 2       | 0.3402   | 0.0481  | 0.25786         | 0.4489          |
| 13                              | 33     | 2       | 0.3196   | 0.0473  | 0.23905         | 0.4273          |
| 14                              | 31     | 2       | 0.299    | 0.0465  | 0.22044         | 0.4055          |
| 15                              | 29     | 3       | 0.268    | 0.045   | 0.19292         | 0.3724          |
| 16                              | 26     | 3       | 0.2371   | 0.0432  | 0.16593         | 0.3388          |
| 17                              | 23     | 2       | 0.2165   | 0.0418  | 0.14826         | 0.3161          |
| 18                              | 21     | 2       | 0.1959   | 0.0403  | 0.13088         | 0.2932          |
| 19                              | 19     | 1       | 0.1856   | 0.0395  | 0.1223          | 0.2816          |
| 20                              | 18     | 2       | 0.1649   | 0.0377  | 0.10541         | 0.2581          |

|    |    |   |        |        |         |        |
|----|----|---|--------|--------|---------|--------|
| 21 | 16 | 2 | 0.1443 | 0.0357 | 0.0889  | 0.2343 |
| 22 | 14 | 2 | 0.1237 | 0.0334 | 0.07284 | 0.2101 |
| 26 | 12 | 1 | 0.1134 | 0.0322 | 0.06501 | 0.1978 |
| 27 | 11 | 1 | 0.1031 | 0.0309 | 0.05732 | 0.1854 |
| 30 | 10 | 1 | 0.0928 | 0.0295 | 0.0498  | 0.1729 |
| 39 | 9  | 1 | 0.0825 | 0.0279 | 0.04247 | 0.1602 |
| 57 | 8  | 1 | 0.0722 | 0.0263 | 0.03535 | 0.1473 |
| 58 | 7  | 1 | 0.0619 | 0.0245 | 0.0285  | 0.1343 |
| 59 | 6  | 1 | 0.0515 | 0.0225 | 0.02195 | 0.121  |
| 60 | 5  | 1 | 0.0412 | 0.0202 | 0.0158  | 0.1077 |
| 61 | 4  | 1 | 0.0309 | 0.0176 | 0.01015 | 0.0942 |
| 62 | 3  | 1 | 0.0206 | 0.0144 | 0.00523 | 0.0813 |
| 64 | 2  | 1 | 0.0103 | 0.0103 | 0.00147 | 0.0724 |
| 65 | 1  | 1 | 0      | NaN    | NA      | NA     |

**Table S40.** Bornova station Kaplan-Meier survival estimates according to SPEI-12

| Kaplan-Meier Wet to Dry (SPEI12) |        |         |          |         |                 |                 |
|----------------------------------|--------|---------|----------|---------|-----------------|-----------------|
|                                  |        | n       | events   | median  | 0.95LCL         | 0.95UCL         |
|                                  |        | 99      | 99       | 12      | 9               | 16              |
| time                             | n.risk | n.event | survival | std.err | lower 95%<br>CI | upper 95%<br>CI |
| 1                                | 99     | 9       | 0.9091   | 0.0289  | 0.85419         | 0.9675          |
| 2                                | 90     | 7       | 0.8384   | 0.037   | 0.76892         | 0.9141          |
| 3                                | 83     | 5       | 0.7879   | 0.0411  | 0.71133         | 0.8727          |
| 4                                | 78     | 5       | 0.7374   | 0.0442  | 0.65559         | 0.8294          |
| 5                                | 73     | 5       | 0.6869   | 0.0466  | 0.60133         | 0.7846          |
| 6                                | 68     | 2       | 0.6667   | 0.0474  | 0.57998         | 0.7663          |
| 7                                | 66     | 3       | 0.6364   | 0.0483  | 0.54832         | 0.7385          |
| 8                                | 63     | 3       | 0.6061   | 0.0491  | 0.51706         | 0.7104          |
| 9                                | 60     | 4       | 0.5657   | 0.0498  | 0.47598         | 0.6722          |
| 10                               | 56     | 4       | 0.5253   | 0.0502  | 0.43555         | 0.6334          |
| 11                               | 52     | 2       | 0.5051   | 0.0502  | 0.41557         | 0.6138          |
| 12                               | 50     | 4       | 0.4646   | 0.0501  | 0.37609         | 0.5741          |
| 13                               | 46     | 3       | 0.4343   | 0.0498  | 0.3469          | 0.5438          |
| 14                               | 43     | 2       | 0.4141   | 0.0495  | 0.32764         | 0.5235          |
| 15                               | 41     | 2       | 0.3939   | 0.0491  | 0.30855         | 0.503           |
| 16                               | 39     | 2       | 0.3737   | 0.0486  | 0.28962         | 0.4823          |
| 17                               | 37     | 2       | 0.3535   | 0.048   | 0.27086         | 0.4614          |
| 18                               | 35     | 3       | 0.3232   | 0.047   | 0.24307         | 0.4298          |
| 19                               | 32     | 3       | 0.2929   | 0.0457  | 0.2157          | 0.3978          |
| 20                               | 29     | 1       | 0.2828   | 0.0453  | 0.20668         | 0.387           |
| 24                               | 28     | 1       | 0.2727   | 0.0448  | 0.19771         | 0.3762          |
| 27                               | 27     | 1       | 0.2626   | 0.0442  | 0.1888          | 0.3653          |
| 28                               | 26     | 1       | 0.2525   | 0.0437  | 0.17994         | 0.3544          |

|    |    |   |        |        |         |        |
|----|----|---|--------|--------|---------|--------|
| 29 | 25 | 1 | 0.2424 | 0.0431 | 0.17114 | 0.3434 |
| 30 | 24 | 1 | 0.2323 | 0.0424 | 0.1624  | 0.3324 |
| 31 | 23 | 1 | 0.2222 | 0.0418 | 0.15372 | 0.3212 |
| 32 | 22 | 1 | 0.2121 | 0.0411 | 0.14511 | 0.3101 |
| 33 | 21 | 1 | 0.202  | 0.0404 | 0.13657 | 0.2988 |
| 34 | 20 | 1 | 0.1919 | 0.0396 | 0.12811 | 0.2875 |
| 35 | 19 | 1 | 0.1818 | 0.0388 | 0.11972 | 0.2761 |
| 36 | 18 | 1 | 0.1717 | 0.0379 | 0.11141 | 0.2647 |
| 37 | 17 | 1 | 0.1616 | 0.037  | 0.10319 | 0.2531 |
| 38 | 16 | 1 | 0.1515 | 0.036  | 0.09506 | 0.2415 |
| 39 | 15 | 1 | 0.1414 | 0.035  | 0.08704 | 0.2298 |
| 41 | 14 | 1 | 0.1313 | 0.0339 | 0.07912 | 0.2179 |
| 42 | 13 | 1 | 0.1212 | 0.0328 | 0.07132 | 0.206  |
| 46 | 12 | 1 | 0.1111 | 0.0316 | 0.06365 | 0.194  |
| 47 | 11 | 1 | 0.101  | 0.0303 | 0.05612 | 0.1818 |
| 48 | 10 | 1 | 0.0909 | 0.0289 | 0.04876 | 0.1695 |
| 86 | 9  | 1 | 0.0808 | 0.0274 | 0.04158 | 0.157  |
| 87 | 8  | 1 | 0.0707 | 0.0258 | 0.03462 | 0.1444 |
| 88 | 7  | 1 | 0.0606 | 0.024  | 0.02791 | 0.1316 |
| 89 | 6  | 1 | 0.0505 | 0.022  | 0.0215  | 0.1186 |
| 90 | 5  | 1 | 0.0404 | 0.0198 | 0.01547 | 0.1055 |
| 91 | 4  | 1 | 0.0303 | 0.0172 | 0.00994 | 0.0923 |
| 92 | 3  | 1 | 0.0202 | 0.0141 | 0.00512 | 0.0796 |
| 93 | 2  | 1 | 0.0101 | 0.01   | 0.00144 | 0.071  |
| 96 | 1  | 1 | 0      | NaN    | NA      | NA     |

**Table S41.** Bornova station Kaplan-Meier drought risk estimates according to SPEI-3, 6, and 12

| Drought Risk (SPEI3) |              | Drought Risk (SPEI6) |              | Drought Risk (SPEI12) |              |
|----------------------|--------------|----------------------|--------------|-----------------------|--------------|
| Time                 | Drought Risk | Time                 | Drought Risk | Time                  | Drought Risk |
| 1                    | 0.0745       | 1                    | 0.0825       | 1                     | 0.0909       |
| 2                    | 0.1064       | 2                    | 0.1753       | 2                     | 0.1616       |
| 3                    | 0.1702       | 3                    | 0.268        | 3                     | 0.2121       |
| 4                    | 0.2553       | 4                    | 0.3093       | 4                     | 0.2626       |
| 5                    | 0.3511       | 5                    | 0.3402       | 5                     | 0.3131       |
| 6                    | 0.4149       | 6                    | 0.4021       | 6                     | 0.3333       |
| 7                    | 0.4894       | 7                    | 0.4536       | 7                     | 0.3636       |
| 8                    | 0.5532       | 8                    | 0.5052       | 8                     | 0.3939       |
| 9                    | 0.5957       | 9                    | 0.5464       | 9                     | 0.4343       |
| 10                   | 0.6489       | 10                   | 0.5876       | 10                    | 0.4747       |
| 11                   | 0.7128       | 11                   | 0.6392       | 11                    | 0.4949       |
| 12                   | 0.734        | 12                   | 0.6598       | 12                    | 0.5354       |
| 13                   | 0.7766       | 13                   | 0.6804       | 13                    | 0.5657       |
| 14                   | 0.7979       | 14                   | 0.701        | 14                    | 0.5859       |
| 15                   | 0.8298       | 15                   | 0.732        | 15                    | 0.6061       |

|    |        |    |        |    |        |
|----|--------|----|--------|----|--------|
| 16 | 0.8617 | 16 | 0.7629 | 16 | 0.6263 |
| 17 | 0.8723 | 17 | 0.7835 | 17 | 0.6465 |
| 18 | 0.8936 | 18 | 0.8041 | 18 | 0.6768 |
| 19 | 0.9043 | 19 | 0.8144 | 19 | 0.7071 |
| 21 | 0.9149 | 20 | 0.8351 | 20 | 0.7172 |
| 25 | 0.9255 | 21 | 0.8557 | 24 | 0.7273 |
| 26 | 0.9468 | 22 | 0.8763 | 27 | 0.7374 |
| 27 | 0.9574 | 26 | 0.8866 | 28 | 0.7475 |
| 30 | 0.9681 | 27 | 0.8969 | 29 | 0.7576 |
| 31 | 0.9787 | 30 | 0.9072 | 30 | 0.7677 |
| 36 | 0.9894 | 39 | 0.9175 | 31 | 0.7778 |
| 37 | 1      | 57 | 0.9278 | 32 | 0.7879 |
|    |        | 58 | 0.9381 | 33 | 0.798  |
|    |        | 59 | 0.9485 | 34 | 0.8081 |
|    |        | 60 | 0.9588 | 35 | 0.8182 |
|    |        | 61 | 0.9691 | 36 | 0.8283 |
|    |        | 62 | 0.9794 | 37 | 0.8384 |
|    |        | 64 | 0.9897 | 38 | 0.8485 |
|    |        | 65 | 1      | 39 | 0.8586 |
|    |        |    |        | 41 | 0.8687 |
|    |        |    |        | 42 | 0.8788 |
|    |        |    |        | 46 | 0.8889 |
|    |        |    |        | 47 | 0.899  |
|    |        |    |        | 48 | 0.9091 |
|    |        |    |        | 86 | 0.9192 |
|    |        |    |        | 87 | 0.9293 |
|    |        |    |        | 88 | 0.9394 |
|    |        |    |        | 89 | 0.9495 |
|    |        |    |        | 90 | 0.9596 |
|    |        |    |        | 91 | 0.9697 |
|    |        |    |        | 92 | 0.9798 |
|    |        |    |        | 93 | 0.9899 |
|    |        |    |        | 96 | 1      |

**Table S42.** Buldan station Kaplan-Meier survival estimates according to SPI-3

| Kaplan-Meier Wet to Dry (SPI3) |        |         |          |         |                 |                 |
|--------------------------------|--------|---------|----------|---------|-----------------|-----------------|
|                                |        | n       | events   | median  | 0.95LCL         | 0.95UCL         |
|                                |        | 52      | 52       | 8.5     | 7               | 11              |
| time                           | n.risk | n.event | survival | std.err | lower 95%<br>CL | upper 95%<br>CL |
| 1                              | 52     | 3       | 0.9423   | 0.0323  | 0.88102         | 1               |
| 2                              | 49     | 2       | 0.9038   | 0.0409  | 0.82717         | 0.988           |
| 3                              | 47     | 5       | 0.8077   | 0.0547  | 0.70737         | 0.922           |
| 4                              | 42     | 4       | 0.7308   | 0.0615  | 0.61963         | 0.862           |
| 5                              | 38     | 2       | 0.6923   | 0.064   | 0.57757         | 0.83            |
| 6                              | 36     | 3       | 0.6346   | 0.0668  | 0.51635         | 0.78            |
| 7                              | 33     | 4       | 0.5577   | 0.0689  | 0.4378          | 0.71            |
| 8                              | 29     | 3       | 0.5      | 0.0693  | 0.381           | 0.656           |
| 9                              | 26     | 3       | 0.4423   | 0.0689  | 0.32597         | 0.6             |
| 10                             | 23     | 3       | 0.3846   | 0.0675  | 0.27272         | 0.542           |
| 11                             | 20     | 5       | 0.2885   | 0.0628  | 0.18823         | 0.442           |
| 12                             | 15     | 3       | 0.2308   | 0.0584  | 0.1405          | 0.379           |
| 13                             | 12     | 3       | 0.1731   | 0.0525  | 0.09555         | 0.314           |
| 14                             | 9      | 2       | 0.1346   | 0.0473  | 0.06758         | 0.268           |
| 15                             | 7      | 1       | 0.1154   | 0.0443  | 0.05436         | 0.245           |
| 18                             | 6      | 2       | 0.0769   | 0.037   | 0.03            | 0.197           |
| 22                             | 4      | 1       | 0.0577   | 0.0323  | 0.01923         | 0.173           |
| 23                             | 3      | 1       | 0.0385   | 0.0267  | 0.00988         | 0.15            |
| 25                             | 2      | 1       | 0.0192   | 0.019   | 0.00276         | 0.134           |
| 37                             | 1      | 1       | 0        | NaN     | NA              | NA              |

**Table S43.** Buldan station Kaplan-Meier survival estimates according to SPI-6

| Kaplan-Meier Wet to Dry (SPI6) |        |         |          |         |                 |                 |
|--------------------------------|--------|---------|----------|---------|-----------------|-----------------|
|                                |        | n       | events   | median  | 0.95LCL         | 0.95UCL         |
|                                |        | 50      | 50       | 8.5     | 6               | 13              |
| time                           | n.risk | n.event | survival | std.err | lower 95%<br>CL | upper 95%<br>CL |
| 0                              | 50     | 1       | 0.98     | 0.0198  | 0.942           | 1               |
| 1                              | 49     | 3       | 0.92     | 0.0384  | 0.8478          | 0.998           |
| 2                              | 46     | 6       | 0.8      | 0.0566  | 0.6965          | 0.919           |
| 3                              | 40     | 5       | 0.7      | 0.0648  | 0.5838          | 0.839           |
| 4                              | 35     | 2       | 0.66     | 0.067   | 0.5409          | 0.805           |
| 5                              | 33     | 1       | 0.64     | 0.0679  | 0.5199          | 0.788           |
| 6                              | 32     | 1       | 0.62     | 0.0686  | 0.4991          | 0.77            |
| 7                              | 31     | 4       | 0.54     | 0.0705  | 0.4181          | 0.697           |
| 8                              | 27     | 2       | 0.5      | 0.0707  | 0.379           | 0.66            |
| 9                              | 25     | 2       | 0.46     | 0.0705  | 0.3407          | 0.621           |
| 10                             | 23     | 2       | 0.42     | 0.0698  | 0.3032          | 0.582           |
| 11                             | 21     | 2       | 0.38     | 0.0686  | 0.2667          | 0.541           |

|    |    |   |      |        |        |       |
|----|----|---|------|--------|--------|-------|
| 12 | 19 | 1 | 0.36 | 0.0679 | 0.2488 | 0.521 |
| 13 | 18 | 2 | 0.32 | 0.066  | 0.2136 | 0.479 |
| 14 | 16 | 2 | 0.28 | 0.0635 | 0.1795 | 0.437 |
| 15 | 14 | 1 | 0.26 | 0.062  | 0.1629 | 0.415 |
| 16 | 13 | 2 | 0.22 | 0.0586 | 0.1305 | 0.371 |
| 17 | 11 | 2 | 0.18 | 0.0543 | 0.0996 | 0.325 |
| 18 | 9  | 2 | 0.14 | 0.0491 | 0.0704 | 0.278 |
| 19 | 7  | 1 | 0.12 | 0.046  | 0.0566 | 0.254 |
| 33 | 6  | 1 | 0.1  | 0.0424 | 0.0435 | 0.23  |
| 34 | 5  | 1 | 0.08 | 0.0384 | 0.0313 | 0.205 |
| 35 | 4  | 1 | 0.06 | 0.0336 | 0.02   | 0.18  |
| 39 | 3  | 1 | 0.04 | 0.0277 | 0.0103 | 0.156 |
| 40 | 2  | 2 | 0    | NaN    | NA     | NA    |

**Table S44.** Buldan station Kaplan-Meier survival estimates according to SPI-12

| Kaplan-Meier Wet to Dry (SPI12) |        |         |          |         |              |              |
|---------------------------------|--------|---------|----------|---------|--------------|--------------|
|                                 |        | n       | events   | median  | 0.95LCL      | 0.95UCL      |
|                                 |        | 63      | 63       | 11      | 9            | 14           |
| time                            | n.risk | n.event | survival | std.err | lower 95% CL | upper 95% CL |
| 1                               | 63     | 3       | 0.9524   | 0.0268  | 0.90122      | 1            |
| 2                               | 60     | 2       | 0.9206   | 0.0341  | 0.85625      | 0.99         |
| 3                               | 58     | 4       | 0.8571   | 0.0441  | 0.77495      | 0.948        |
| 4                               | 54     | 4       | 0.7937   | 0.051   | 0.69976      | 0.9          |
| 5                               | 50     | 2       | 0.7619   | 0.0537  | 0.66367      | 0.875        |
| 6                               | 48     | 2       | 0.7302   | 0.0559  | 0.62838      | 0.848        |
| 7                               | 46     | 3       | 0.6825   | 0.0586  | 0.57675      | 0.808        |
| 8                               | 43     | 4       | 0.619    | 0.0612  | 0.51003      | 0.751        |
| 9                               | 39     | 3       | 0.5714   | 0.0623  | 0.46141      | 0.708        |
| 10                              | 36     | 3       | 0.5238   | 0.0629  | 0.41393      | 0.663        |
| 11                              | 33     | 3       | 0.4762   | 0.0629  | 0.36754      | 0.617        |
| 12                              | 30     | 3       | 0.4286   | 0.0623  | 0.32225      | 0.57         |
| 13                              | 27     | 3       | 0.381    | 0.0612  | 0.27808      | 0.522        |
| 14                              | 24     | 3       | 0.3333   | 0.0594  | 0.23508      | 0.473        |
| 15                              | 21     | 1       | 0.3175   | 0.0586  | 0.22103      | 0.456        |
| 16                              | 20     | 1       | 0.3016   | 0.0578  | 0.20712      | 0.439        |
| 17                              | 19     | 1       | 0.2857   | 0.0569  | 0.19336      | 0.422        |
| 18                              | 18     | 1       | 0.2698   | 0.0559  | 0.17976      | 0.405        |
| 19                              | 17     | 1       | 0.254    | 0.0548  | 0.16633      | 0.388        |
| 30                              | 16     | 1       | 0.2381   | 0.0537  | 0.15308      | 0.37         |
| 31                              | 15     | 1       | 0.2222   | 0.0524  | 0.14001      | 0.353        |
| 32                              | 14     | 1       | 0.2063   | 0.051   | 0.12714      | 0.335        |
| 33                              | 13     | 1       | 0.1905   | 0.0495  | 0.11449      | 0.317        |
| 34                              | 12     | 1       | 0.1746   | 0.0478  | 0.10207      | 0.299        |



|    |    |   |        |        |         |       |
|----|----|---|--------|--------|---------|-------|
| 35 | 11 | 1 | 0.1587 | 0.046  | 0.0899  | 0.28  |
| 36 | 10 | 1 | 0.1429 | 0.0441 | 0.07802 | 0.262 |
| 37 | 9  | 1 | 0.127  | 0.0419 | 0.06646 | 0.243 |
| 38 | 8  | 1 | 0.1111 | 0.0396 | 0.05526 | 0.223 |
| 39 | 7  | 1 | 0.0952 | 0.037  | 0.04449 | 0.204 |
| 40 | 6  | 1 | 0.0794 | 0.0341 | 0.03423 | 0.184 |
| 47 | 5  | 1 | 0.0635 | 0.0307 | 0.0246  | 0.164 |
| 64 | 4  | 1 | 0.0476 | 0.0268 | 0.01578 | 0.144 |
| 65 | 3  | 1 | 0.0317 | 0.0221 | 0.00812 | 0.124 |
| 87 | 2  | 1 | 0.0159 | 0.0157 | 0.00227 | 0.111 |
| 88 | 1  | 1 | 0      | NaN    | NA      | NA    |

**Table S45.** Buldan station Kaplan-Meier drought risk estimates according to SPI-3, 6, and 12

| Drought Risk (SPI3) |              | Drought Risk (SPI6) |              | Drought Risk (SPI12) |              |
|---------------------|--------------|---------------------|--------------|----------------------|--------------|
| Time                | Drought Risk | Time                | Drought Risk | Time                 | Drought Risk |
| 1                   | 0.0577       | 0                   | 0.02         | 1                    | 0.0476       |
| 2                   | 0.0962       | 1                   | 0.08         | 2                    | 0.0794       |
| 3                   | 0.1923       | 2                   | 0.2          | 3                    | 0.1429       |
| 4                   | 0.2692       | 3                   | 0.3          | 4                    | 0.2063       |
| 5                   | 0.3077       | 4                   | 0.34         | 5                    | 0.2381       |
| 6                   | 0.3654       | 5                   | 0.36         | 6                    | 0.2698       |
| 7                   | 0.4423       | 6                   | 0.38         | 7                    | 0.3175       |
| 8                   | 0.5          | 7                   | 0.46         | 8                    | 0.381        |
| 9                   | 0.5577       | 8                   | 0.5          | 9                    | 0.4286       |
| 10                  | 0.6154       | 9                   | 0.54         | 10                   | 0.4762       |
| 11                  | 0.7115       | 10                  | 0.58         | 11                   | 0.5238       |
| 12                  | 0.7692       | 11                  | 0.62         | 12                   | 0.5714       |
| 13                  | 0.8269       | 12                  | 0.64         | 13                   | 0.619        |
| 14                  | 0.8654       | 13                  | 0.68         | 14                   | 0.6667       |
| 15                  | 0.8846       | 14                  | 0.72         | 15                   | 0.6825       |
| 18                  | 0.9231       | 15                  | 0.74         | 16                   | 0.6984       |
| 22                  | 0.9423       | 16                  | 0.78         | 17                   | 0.7143       |
| 23                  | 0.9615       | 17                  | 0.82         | 18                   | 0.7302       |
| 25                  | 0.9808       | 18                  | 0.86         | 19                   | 0.746        |
| 37                  | 1            | 19                  | 0.88         | 30                   | 0.7619       |
|                     |              | 33                  | 0.9          | 31                   | 0.7778       |
|                     |              | 34                  | 0.92         | 32                   | 0.7937       |
|                     |              | 35                  | 0.94         | 33                   | 0.8095       |
|                     |              | 39                  | 0.96         | 34                   | 0.8254       |
|                     |              | 40                  | 1            | 35                   | 0.8413       |
|                     |              |                     |              | 36                   | 0.8571       |
|                     |              |                     |              | 37                   | 0.873        |
|                     |              |                     |              | 38                   | 0.8889       |
|                     |              |                     |              | 39                   | 0.9048       |

|    |        |
|----|--------|
| 40 | 0.9206 |
| 47 | 0.9365 |
| 64 | 0.9524 |
| 65 | 0.9683 |
| 87 | 0.9841 |
| 88 | 1      |

**Table S46.** Buldan station Kaplan-Meier survival estimates according to SPEI-3

| Kaplan-Meier Wet to Dry (SPEI3) |        |         |          |         |              |              |
|---------------------------------|--------|---------|----------|---------|--------------|--------------|
|                                 |        | n       | events   | median  | 0.95LCL      | 0.95UCL      |
|                                 |        | 61      | 61       | 8       | 7            | 10           |
| time                            | n.risk | n.event | survival | std.err | lower 95% CI | upper 95% CI |
| 1                               | 61     | 4       | 0.9344   | 0.0317  | 0.87433      | 0.999        |
| 2                               | 57     | 4       | 0.8689   | 0.0432  | 0.78814      | 0.958        |
| 3                               | 53     | 5       | 0.7869   | 0.0524  | 0.69055      | 0.897        |
| 4                               | 48     | 3       | 0.7377   | 0.0563  | 0.63518      | 0.857        |
| 5                               | 45     | 3       | 0.6885   | 0.0593  | 0.58159      | 0.815        |
| 6                               | 42     | 4       | 0.623    | 0.0621  | 0.51247      | 0.757        |
| 7                               | 38     | 6       | 0.5246   | 0.0639  | 0.41311      | 0.666        |
| 8                               | 32     | 6       | 0.4262   | 0.0633  | 0.31856      | 0.57         |
| 9                               | 26     | 4       | 0.3607   | 0.0615  | 0.25822      | 0.504        |
| 10                              | 22     | 4       | 0.2951   | 0.0584  | 0.20021      | 0.435        |
| 11                              | 18     | 3       | 0.2459   | 0.0551  | 0.15846      | 0.382        |
| 12                              | 15     | 2       | 0.2131   | 0.0524  | 0.13158      | 0.345        |
| 13                              | 13     | 3       | 0.1639   | 0.0474  | 0.09301      | 0.289        |
| 14                              | 10     | 3       | 0.1148   | 0.0408  | 0.05716      | 0.23         |
| 15                              | 7      | 2       | 0.082    | 0.0351  | 0.03539      | 0.19         |
| 16                              | 5      | 1       | 0.0656   | 0.0317  | 0.02543      | 0.169        |
| 17                              | 4      | 1       | 0.0492   | 0.0277  | 0.01631      | 0.148        |
| 19                              | 3      | 1       | 0.0328   | 0.0228  | 0.00839      | 0.128        |
| 22                              | 2      | 1       | 0.0164   | 0.0163  | 0.00235      | 0.115        |
| 31                              | 1      | 1       | 0        | NaN     | NA           | NA           |

**Table S47.** Buldan station Kaplan-Meier survival estimates according to SPEI-6

| Kaplan-Meier Wet to Dry (SPEI6) |        |         |          |         |              |              |
|---------------------------------|--------|---------|----------|---------|--------------|--------------|
|                                 |        | n       | events   | median  | 0.95LCL      | 0.95UCL      |
|                                 |        | 65      | 65       | 11      | 8            | 14           |
| time                            | n.risk | n.event | survival | std.err | lower 95% CI | upper 95% CI |
| 1                               | 65     | 6       | 0.9077   | 0.0359  | 0.83998      | 0.981        |
| 2                               | 59     | 6       | 0.8154   | 0.0481  | 0.72631      | 0.915        |
| 3                               | 53     | 5       | 0.7385   | 0.0545  | 0.63899      | 0.853        |

|    |    |   |        |        |         |       |
|----|----|---|--------|--------|---------|-------|
| 4  | 48 | 3 | 0.6923 | 0.0572 | 0.58873 | 0.814 |
| 5  | 45 | 1 | 0.6769 | 0.058  | 0.57227 | 0.801 |
| 6  | 44 | 1 | 0.6615 | 0.0587 | 0.55595 | 0.787 |
| 7  | 43 | 2 | 0.6308 | 0.0599 | 0.52371 | 0.76  |
| 8  | 41 | 2 | 0.6    | 0.0608 | 0.49198 | 0.732 |
| 9  | 39 | 3 | 0.5538 | 0.0617 | 0.44528 | 0.689 |
| 10 | 36 | 3 | 0.5077 | 0.062  | 0.39961 | 0.645 |
| 11 | 33 | 4 | 0.4462 | 0.0617 | 0.34029 | 0.585 |
| 12 | 29 | 3 | 0.4    | 0.0608 | 0.297   | 0.539 |
| 13 | 26 | 2 | 0.3692 | 0.0599 | 0.26872 | 0.507 |
| 14 | 24 | 1 | 0.3538 | 0.0593 | 0.25477 | 0.491 |
| 15 | 23 | 2 | 0.3231 | 0.058  | 0.22724 | 0.459 |
| 16 | 21 | 3 | 0.2769 | 0.0555 | 0.18696 | 0.41  |
| 17 | 18 | 5 | 0.2    | 0.0496 | 0.12299 | 0.325 |
| 18 | 13 | 2 | 0.1692 | 0.0465 | 0.09875 | 0.29  |
| 19 | 11 | 1 | 0.1538 | 0.0448 | 0.08699 | 0.272 |
| 30 | 10 | 1 | 0.1385 | 0.0428 | 0.0755  | 0.254 |
| 37 | 9  | 1 | 0.1231 | 0.0407 | 0.06432 | 0.236 |
| 38 | 8  | 1 | 0.1077 | 0.0384 | 0.05349 | 0.217 |
| 39 | 7  | 1 | 0.0923 | 0.0359 | 0.04307 | 0.198 |
| 40 | 6  | 1 | 0.0769 | 0.0331 | 0.03314 | 0.179 |
| 41 | 5  | 1 | 0.0615 | 0.0298 | 0.02381 | 0.159 |
| 42 | 4  | 1 | 0.0462 | 0.026  | 0.01528 | 0.139 |
| 43 | 3  | 1 | 0.0308 | 0.0214 | 0.00786 | 0.12  |
| 44 | 2  | 1 | 0.0154 | 0.0153 | 0.0022  | 0.108 |
| 64 | 1  | 1 | 0      | NaN    | NA      | NA    |

**Table S48.** Buldan station Kaplan-Meier survival estimates according to SPEI-12

| Kaplan-Meier Wet to Dry (SPEI12) |        |         |          |         |              |              |
|----------------------------------|--------|---------|----------|---------|--------------|--------------|
|                                  |        | n       | events   | median  | 0.95LCL      | 0.95UCL      |
|                                  |        | 69      | 69       | 8       | 7            | 11           |
| time                             | n.risk | n.event | survival | std.err | lower 95% CI | upper 95% CI |
| 1                                | 69     | 5       | 0.9275   | 0.0312  | 0.86834      | 0.991        |
| 2                                | 64     | 5       | 0.8551   | 0.0424  | 0.77592      | 0.942        |
| 3                                | 59     | 5       | 0.7826   | 0.0497  | 0.69109      | 0.886        |
| 4                                | 54     | 4       | 0.7246   | 0.0538  | 0.62655      | 0.838        |
| 5                                | 50     | 4       | 0.6667   | 0.0568  | 0.56422      | 0.788        |
| 6                                | 46     | 4       | 0.6087   | 0.0588  | 0.50378      | 0.735        |
| 7                                | 42     | 4       | 0.5507   | 0.0599  | 0.44502      | 0.682        |
| 8                                | 38     | 4       | 0.4928   | 0.0602  | 0.38785      | 0.626        |
| 9                                | 34     | 3       | 0.4493   | 0.0599  | 0.34599      | 0.583        |
| 10                               | 31     | 3       | 0.4058   | 0.0591  | 0.30501      | 0.54         |
| 11                               | 28     | 3       | 0.3623   | 0.0579  | 0.26494      | 0.495        |

|    |    |   |        |        |         |       |
|----|----|---|--------|--------|---------|-------|
| 12 | 25 | 3 | 0.3188 | 0.0561 | 0.22584 | 0.45  |
| 13 | 22 | 4 | 0.2609 | 0.0529 | 0.17536 | 0.388 |
| 14 | 18 | 4 | 0.2029 | 0.0484 | 0.12711 | 0.324 |
| 15 | 14 | 1 | 0.1884 | 0.0471 | 0.11545 | 0.307 |
| 16 | 13 | 1 | 0.1739 | 0.0456 | 0.10399 | 0.291 |
| 17 | 12 | 1 | 0.1594 | 0.0441 | 0.09273 | 0.274 |
| 31 | 11 | 1 | 0.1449 | 0.0424 | 0.0817  | 0.257 |
| 38 | 10 | 1 | 0.1304 | 0.0405 | 0.07093 | 0.24  |
| 39 | 9  | 1 | 0.1159 | 0.0385 | 0.06043 | 0.222 |
| 40 | 8  | 1 | 0.1014 | 0.0363 | 0.05027 | 0.205 |
| 41 | 7  | 1 | 0.087  | 0.0339 | 0.04048 | 0.187 |
| 42 | 6  | 1 | 0.0725 | 0.0312 | 0.03115 | 0.169 |
| 43 | 5  | 1 | 0.058  | 0.0281 | 0.02239 | 0.15  |
| 44 | 4  | 1 | 0.0435 | 0.0246 | 0.01438 | 0.131 |
| 45 | 3  | 1 | 0.029  | 0.0202 | 0.0074  | 0.114 |
| 64 | 2  | 1 | 0.0145 | 0.0144 | 0.00207 | 0.101 |
| 87 | 1  | 1 | 0      | NaN    | NA      | NA    |

**Table S49.** Buldan station Kaplan-Meier drought risk estimates according to SPEI-3, 6, and 12

| Drought Risk (SPEI3) |              | Drought Risk (SPEI6) |              | Drought Risk (SPEI12) |              |
|----------------------|--------------|----------------------|--------------|-----------------------|--------------|
| Time                 | Drought Risk | Time                 | Drought Risk | Time                  | Drought Risk |
| 1                    | 0.0656       | 1                    | 0.0923       | 1                     | 0.0725       |
| 2                    | 0.1311       | 2                    | 0.1846       | 2                     | 0.1449       |
| 3                    | 0.2131       | 3                    | 0.2615       | 3                     | 0.2174       |
| 4                    | 0.2623       | 4                    | 0.3077       | 4                     | 0.2754       |
| 5                    | 0.3115       | 5                    | 0.3231       | 5                     | 0.3333       |
| 6                    | 0.377        | 6                    | 0.3385       | 6                     | 0.3913       |
| 7                    | 0.4754       | 7                    | 0.3692       | 7                     | 0.4493       |
| 8                    | 0.5738       | 8                    | 0.4          | 8                     | 0.5072       |
| 9                    | 0.6393       | 9                    | 0.4462       | 9                     | 0.5507       |
| 10                   | 0.7049       | 10                   | 0.4923       | 10                    | 0.5942       |
| 11                   | 0.7541       | 11                   | 0.5538       | 11                    | 0.6377       |
| 12                   | 0.7869       | 12                   | 0.6          | 12                    | 0.6812       |
| 13                   | 0.8361       | 13                   | 0.6308       | 13                    | 0.7391       |
| 14                   | 0.8852       | 14                   | 0.6462       | 14                    | 0.7971       |
| 15                   | 0.918        | 15                   | 0.6769       | 15                    | 0.8116       |
| 16                   | 0.9344       | 16                   | 0.7231       | 16                    | 0.8261       |
| 17                   | 0.9508       | 17                   | 0.8          | 17                    | 0.8406       |
| 19                   | 0.9672       | 18                   | 0.8308       | 31                    | 0.8551       |
| 22                   | 0.9836       | 19                   | 0.8462       | 38                    | 0.8696       |
| 31                   | 1            | 30                   | 0.8615       | 39                    | 0.8841       |
|                      |              | 37                   | 0.8769       | 40                    | 0.8986       |
|                      |              | 38                   | 0.8923       | 41                    | 0.913        |
|                      |              | 39                   | 0.9077       | 42                    | 0.9275       |

|    |        |    |        |
|----|--------|----|--------|
| 40 | 0.9231 | 43 | 0.942  |
| 41 | 0.9385 | 44 | 0.9565 |
| 42 | 0.9538 | 45 | 0.971  |
| 43 | 0.9692 | 64 | 0.9855 |
| 44 | 0.9846 | 87 | 1      |
| 64 | 1      |    |        |

**Table S50.** Demirci station Kaplan-Meier survival estimates according to SPI-3

| Kaplan-Meier Wet to Dry (SPI3) |        |         |          |         |              |              |
|--------------------------------|--------|---------|----------|---------|--------------|--------------|
|                                |        | n       | events   | median  | 0.95LCL      | 0.95UCL      |
|                                |        | 118     | 118      | 9.5     | 8            | 12           |
| time                           | n.risk | n.event | survival | std.err | lower 95% CL | upper 95% CL |
| 1                              | 118    | 3       | 0.97458  | 0.01449 | 0.94659      | 1            |
| 2                              | 115    | 4       | 0.94068  | 0.02175 | 0.89901      | 0.9843       |
| 3                              | 111    | 10      | 0.85593  | 0.03233 | 0.79486      | 0.9217       |
| 4                              | 101    | 12      | 0.75424  | 0.03963 | 0.68042      | 0.8361       |
| 5                              | 89     | 9       | 0.67797  | 0.04301 | 0.59869      | 0.7677       |
| 6                              | 80     | 6       | 0.62712  | 0.04452 | 0.54567      | 0.7207       |
| 7                              | 74     | 4       | 0.59322  | 0.04522 | 0.51089      | 0.6888       |
| 8                              | 70     | 7       | 0.5339   | 0.04592 | 0.45107      | 0.6319       |
| 9                              | 63     | 4       | 0.5      | 0.04603 | 0.41746      | 0.5989       |
| 10                             | 59     | 4       | 0.4661   | 0.04592 | 0.38425      | 0.5654       |
| 11                             | 55     | 4       | 0.4322   | 0.0456  | 0.35146      | 0.5315       |
| 12                             | 51     | 5       | 0.38983  | 0.0449  | 0.31106      | 0.4886       |
| 13                             | 46     | 4       | 0.35593  | 0.04408 | 0.27923      | 0.4537       |
| 14                             | 42     | 4       | 0.32203  | 0.04301 | 0.24786      | 0.4184       |
| 15                             | 38     | 5       | 0.27966  | 0.04132 | 0.20935      | 0.3736       |
| 16                             | 33     | 3       | 0.25424  | 0.04008 | 0.18665      | 0.3463       |
| 17                             | 30     | 4       | 0.22034  | 0.03816 | 0.15692      | 0.3094       |
| 18                             | 26     | 4       | 0.18644  | 0.03585 | 0.12789      | 0.2718       |
| 19                             | 22     | 3       | 0.16102  | 0.03384 | 0.10666      | 0.2431       |
| 20                             | 19     | 4       | 0.12712  | 0.03066 | 0.07923      | 0.204        |
| 21                             | 15     | 2       | 0.11017  | 0.02882 | 0.06597      | 0.184        |
| 23                             | 13     | 1       | 0.10169  | 0.02782 | 0.05949      | 0.1739       |
| 24                             | 12     | 2       | 0.08475  | 0.02564 | 0.04684      | 0.1533       |
| 25                             | 10     | 1       | 0.07627  | 0.02443 | 0.04071      | 0.1429       |
| 26                             | 9      | 1       | 0.0678   | 0.02314 | 0.03473      | 0.1324       |
| 27                             | 8      | 2       | 0.05085  | 0.02022 | 0.02332      | 0.1109       |
| 28                             | 6      | 1       | 0.04237  | 0.01854 | 0.01797      | 0.0999       |
| 32                             | 5      | 2       | 0.02542  | 0.01449 | 0.00832      | 0.0777       |
| 33                             | 3      | 1       | 0.01695  | 0.01188 | 0.00429      | 0.067        |
| 34                             | 2      | 1       | 0.00847  | 0.00844 | 0.0012       | 0.0597       |
| 36                             | 1      | 1       | 0        | NaN     | NA           | NA           |

**Table S51.** Demirci station Kaplan-Meier survival estimates according to SPI-6

| Kaplan-Meier Wet to Dry (SPI6) |        |         |          |         |              |              |
|--------------------------------|--------|---------|----------|---------|--------------|--------------|
|                                |        | n       | events   | median  | 0.95LCL      | 0.95UCL      |
|                                |        | 107     | 107      | 13      | 11           | 16           |
| time                           | n.risk | n.event | survival | std.err | lower 95% CL | upper 95% CL |
| 1                              | 107    | 3       | 0.97196  | 0.016   | 0.94118      | 1            |
| 2                              | 104    | 6       | 0.91589  | 0.0268  | 0.86478      | 0.97         |
| 3                              | 98     | 5       | 0.86916  | 0.0326  | 0.80755      | 0.9355       |
| 4                              | 93     | 4       | 0.83178  | 0.0362  | 0.76383      | 0.9058       |
| 6                              | 89     | 2       | 0.81308  | 0.0377  | 0.74247      | 0.8904       |
| 7                              | 87     | 7       | 0.74766  | 0.042   | 0.66973      | 0.8347       |
| 8                              | 80     | 5       | 0.70093  | 0.0443  | 0.61934      | 0.7933       |
| 9                              | 75     | 7       | 0.63551  | 0.0465  | 0.55056      | 0.7336       |
| 10                             | 68     | 4       | 0.59813  | 0.0474  | 0.51209      | 0.6986       |
| 11                             | 64     | 4       | 0.56075  | 0.048   | 0.47417      | 0.6631       |
| 12                             | 60     | 4       | 0.52336  | 0.0483  | 0.43679      | 0.6271       |
| 13                             | 56     | 4       | 0.48598  | 0.0483  | 0.39994      | 0.5905       |
| 14                             | 52     | 3       | 0.45794  | 0.0482  | 0.37264      | 0.5628       |
| 15                             | 49     | 4       | 0.42056  | 0.0477  | 0.3367       | 0.5253       |
| 16                             | 45     | 3       | 0.39252  | 0.0472  | 0.3101       | 0.4969       |
| 17                             | 42     | 4       | 0.35514  | 0.0463  | 0.27512      | 0.4584       |
| 18                             | 38     | 5       | 0.30841  | 0.0446  | 0.23222      | 0.4096       |
| 19                             | 33     | 4       | 0.27103  | 0.043   | 0.19864      | 0.3698       |
| 20                             | 29     | 2       | 0.25234  | 0.042   | 0.18211      | 0.3496       |
| 21                             | 27     | 1       | 0.24299  | 0.0415  | 0.17392      | 0.3395       |
| 23                             | 26     | 3       | 0.21495  | 0.0397  | 0.14965      | 0.3087       |
| 24                             | 23     | 2       | 0.19626  | 0.0384  | 0.13376      | 0.288        |
| 25                             | 21     | 3       | 0.16822  | 0.0362  | 0.11039      | 0.2564       |
| 26                             | 18     | 2       | 0.14953  | 0.0345  | 0.09517      | 0.235        |
| 27                             | 16     | 2       | 0.13084  | 0.0326  | 0.08029      | 0.2132       |
| 28                             | 14     | 3       | 0.1028   | 0.0294  | 0.05874      | 0.1799       |
| 29                             | 11     | 3       | 0.07477  | 0.0254  | 0.03839      | 0.1456       |
| 30                             | 8      | 2       | 0.05607  | 0.0222  | 0.02577      | 0.122        |
| 31                             | 6      | 1       | 0.04673  | 0.0204  | 0.01986      | 0.11         |
| 36                             | 5      | 1       | 0.03738  | 0.0183  | 0.01429      | 0.0978       |
| 37                             | 4      | 1       | 0.02804  | 0.016   | 0.00919      | 0.0856       |
| 42                             | 3      | 1       | 0.01869  | 0.0131  | 0.00474      | 0.0738       |
| 44                             | 2      | 1       | 0.00935  | 0.0093  | 0.00133      | 0.0657       |
| 94                             | 1      | 1       | 0        | NaN     | NA           | NA           |

**Table S52.** Demirci station Kaplan-Meier survival estimates according to SPI-12

| Kaplan-Meier Wet to Dry (SPI12) |        |         |          |         |                 |                 |
|---------------------------------|--------|---------|----------|---------|-----------------|-----------------|
|                                 |        | n       | events   | median  | 0.95LCL         | 0.95UCL         |
|                                 |        | 107     | 107      | 18      | 16              | 22              |
| time                            | n.risk | n.event | survival | std.err | lower 95%<br>CL | upper 95%<br>CL |
| 1                               | 107    | 2       | 0.98131  | 0.0131  | 0.95598         | 1               |
| 2                               | 105    | 3       | 0.95327  | 0.0204  | 0.91411         | 0.9941          |
| 3                               | 102    | 3       | 0.92523  | 0.0254  | 0.87672         | 0.9764          |
| 4                               | 99     | 4       | 0.88785  | 0.0305  | 0.83003         | 0.9497          |
| 5                               | 95     | 2       | 0.86916  | 0.0326  | 0.80755         | 0.9355          |
| 6                               | 93     | 2       | 0.85047  | 0.0345  | 0.78551         | 0.9208          |
| 7                               | 91     | 2       | 0.83178  | 0.0362  | 0.76383         | 0.9058          |
| 8                               | 89     | 4       | 0.79439  | 0.0391  | 0.72139         | 0.8748          |
| 9                               | 85     | 3       | 0.76636  | 0.0409  | 0.69023         | 0.8509          |
| 10                              | 82     | 2       | 0.74766  | 0.042   | 0.66973         | 0.8347          |
| 11                              | 80     | 1       | 0.73832  | 0.0425  | 0.65956         | 0.8265          |
| 12                              | 79     | 3       | 0.71028  | 0.0439  | 0.62932         | 0.8017          |
| 13                              | 76     | 4       | 0.6729   | 0.0454  | 0.58962         | 0.7679          |
| 14                              | 72     | 5       | 0.62617  | 0.0468  | 0.54089         | 0.7249          |
| 15                              | 67     | 4       | 0.58879  | 0.0476  | 0.50256         | 0.6898          |
| 16                              | 63     | 4       | 0.5514   | 0.0481  | 0.46478         | 0.6542          |
| 17                              | 59     | 5       | 0.50467  | 0.0483  | 0.4183          | 0.6089          |
| 18                              | 54     | 4       | 0.46729  | 0.0482  | 0.3817          | 0.5721          |
| 19                              | 50     | 3       | 0.43925  | 0.048   | 0.3546          | 0.5441          |
| 20                              | 47     | 2       | 0.42056  | 0.0477  | 0.3367          | 0.5253          |
| 21                              | 45     | 2       | 0.40187  | 0.0474  | 0.31893         | 0.5064          |
| 22                              | 43     | 2       | 0.38318  | 0.047   | 0.3013          | 0.4873          |
| 23                              | 41     | 2       | 0.36449  | 0.0465  | 0.28381         | 0.4681          |
| 24                              | 39     | 2       | 0.34579  | 0.046   | 0.26646         | 0.4487          |
| 25                              | 37     | 2       | 0.3271   | 0.0454  | 0.24926         | 0.4292          |
| 26                              | 35     | 1       | 0.31776  | 0.045   | 0.24072         | 0.4194          |
| 27                              | 34     | 1       | 0.30841  | 0.0446  | 0.23222         | 0.4096          |
| 28                              | 33     | 1       | 0.29907  | 0.0443  | 0.22376         | 0.3997          |
| 29                              | 32     | 1       | 0.28972  | 0.0439  | 0.21534         | 0.3898          |
| 30                              | 31     | 2       | 0.27103  | 0.043   | 0.19864         | 0.3698          |
| 31                              | 29     | 1       | 0.26168  | 0.0425  | 0.19035         | 0.3597          |
| 32                              | 28     | 1       | 0.25234  | 0.042   | 0.18211         | 0.3496          |
| 33                              | 27     | 1       | 0.24299  | 0.0415  | 0.17392         | 0.3395          |
| 34                              | 26     | 2       | 0.2243   | 0.0403  | 0.15769         | 0.319           |
| 35                              | 24     | 3       | 0.19626  | 0.0384  | 0.13376         | 0.288           |
| 36                              | 21     | 1       | 0.18692  | 0.0377  | 0.1259          | 0.2775          |
| 37                              | 20     | 1       | 0.17757  | 0.0369  | 0.11811         | 0.267           |
| 38                              | 19     | 1       | 0.16822  | 0.0362  | 0.11039         | 0.2564          |

|     |    |   |         |        |         |        |
|-----|----|---|---------|--------|---------|--------|
| 39  | 18 | 1 | 0.15888 | 0.0353 | 0.10274 | 0.2457 |
| 40  | 17 | 1 | 0.14953 | 0.0345 | 0.09517 | 0.235  |
| 41  | 16 | 1 | 0.14019 | 0.0336 | 0.08768 | 0.2241 |
| 42  | 15 | 1 | 0.13084 | 0.0326 | 0.08029 | 0.2132 |
| 43  | 14 | 1 | 0.1215  | 0.0316 | 0.07299 | 0.2022 |
| 44  | 13 | 1 | 0.11215 | 0.0305 | 0.06581 | 0.1911 |
| 45  | 12 | 1 | 0.1028  | 0.0294 | 0.05874 | 0.1799 |
| 46  | 11 | 1 | 0.09346 | 0.0281 | 0.0518  | 0.1686 |
| 47  | 10 | 1 | 0.08411 | 0.0268 | 0.04501 | 0.1572 |
| 48  | 9  | 1 | 0.07477 | 0.0254 | 0.03839 | 0.1456 |
| 49  | 8  | 2 | 0.05607 | 0.0222 | 0.02577 | 0.122  |
| 50  | 6  | 1 | 0.04673 | 0.0204 | 0.01986 | 0.11   |
| 97  | 5  | 1 | 0.03738 | 0.0183 | 0.01429 | 0.0978 |
| 98  | 4  | 1 | 0.02804 | 0.016  | 0.00919 | 0.0856 |
| 99  | 3  | 1 | 0.01869 | 0.0131 | 0.00474 | 0.0738 |
| 130 | 2  | 1 | 0.00935 | 0.0093 | 0.00133 | 0.0657 |
| 131 | 1  | 1 | 0       | NaN    | NA      | NA     |

**Table S53.** Demirci station Kaplan-Meier drought risk estimates according to SPI-3, 6, and 12

| Drought Risk (SPI3) |              | Drought Risk (SPI6) |              | Drought Risk (SPI12) |              |
|---------------------|--------------|---------------------|--------------|----------------------|--------------|
| Time                | Drought Risk | Time                | Drought Risk | Time                 | Drought Risk |
| 1                   | 0.02542      | 1                   | 0.02804      | 1                    | 0.01869      |
| 2                   | 0.05932      | 2                   | 0.08411      | 2                    | 0.04673      |
| 3                   | 0.14407      | 3                   | 0.13084      | 3                    | 0.07477      |
| 4                   | 0.24576      | 4                   | 0.16822      | 4                    | 0.11215      |
| 5                   | 0.32203      | 6                   | 0.18692      | 5                    | 0.13084      |
| 6                   | 0.37288      | 7                   | 0.25234      | 6                    | 0.14953      |
| 7                   | 0.40678      | 8                   | 0.29907      | 7                    | 0.16822      |
| 8                   | 0.4661       | 9                   | 0.36449      | 8                    | 0.20561      |
| 9                   | 0.5          | 10                  | 0.40187      | 9                    | 0.23364      |
| 10                  | 0.5339       | 11                  | 0.43925      | 10                   | 0.25234      |
| 11                  | 0.5678       | 12                  | 0.47664      | 11                   | 0.26168      |
| 12                  | 0.61017      | 13                  | 0.51402      | 12                   | 0.28972      |
| 13                  | 0.64407      | 14                  | 0.54206      | 13                   | 0.3271       |
| 14                  | 0.67797      | 15                  | 0.57944      | 14                   | 0.37383      |
| 15                  | 0.72034      | 16                  | 0.60748      | 15                   | 0.41121      |
| 16                  | 0.74576      | 17                  | 0.64486      | 16                   | 0.4486       |
| 17                  | 0.77966      | 18                  | 0.69159      | 17                   | 0.49533      |
| 18                  | 0.81356      | 19                  | 0.72897      | 18                   | 0.53271      |
| 19                  | 0.83898      | 20                  | 0.74766      | 19                   | 0.56075      |
| 20                  | 0.87288      | 21                  | 0.75701      | 20                   | 0.57944      |
| 21                  | 0.88983      | 23                  | 0.78505      | 21                   | 0.59813      |
| 23                  | 0.89831      | 24                  | 0.80374      | 22                   | 0.61682      |
| 24                  | 0.91525      | 25                  | 0.83178      | 23                   | 0.63551      |



|    |         |    |         |     |         |
|----|---------|----|---------|-----|---------|
| 25 | 0.92373 | 26 | 0.85047 | 24  | 0.65421 |
| 26 | 0.9322  | 27 | 0.86916 | 25  | 0.6729  |
| 27 | 0.94915 | 28 | 0.8972  | 26  | 0.68224 |
| 28 | 0.95763 | 29 | 0.92523 | 27  | 0.69159 |
| 32 | 0.97458 | 30 | 0.94393 | 28  | 0.70093 |
| 33 | 0.98305 | 31 | 0.95327 | 29  | 0.71028 |
| 34 | 0.99153 | 36 | 0.96262 | 30  | 0.72897 |
| 36 | 1       | 37 | 0.97196 | 31  | 0.73832 |
|    |         | 42 | 0.98131 | 32  | 0.74766 |
|    |         | 44 | 0.99065 | 33  | 0.75701 |
|    |         | 94 | 1       | 34  | 0.7757  |
|    |         |    |         | 35  | 0.80374 |
|    |         |    |         | 36  | 0.81308 |
|    |         |    |         | 37  | 0.82243 |
|    |         |    |         | 38  | 0.83178 |
|    |         |    |         | 39  | 0.84112 |
|    |         |    |         | 40  | 0.85047 |
|    |         |    |         | 41  | 0.85981 |
|    |         |    |         | 42  | 0.86916 |
|    |         |    |         | 43  | 0.8785  |
|    |         |    |         | 44  | 0.88785 |
|    |         |    |         | 45  | 0.8972  |
|    |         |    |         | 46  | 0.90654 |
|    |         |    |         | 47  | 0.91589 |
|    |         |    |         | 48  | 0.92523 |
|    |         |    |         | 49  | 0.94393 |
|    |         |    |         | 50  | 0.95327 |
|    |         |    |         | 97  | 0.96262 |
|    |         |    |         | 98  | 0.97196 |
|    |         |    |         | 99  | 0.98131 |
|    |         |    |         | 130 | 0.99065 |
|    |         |    |         | 131 | 1       |

**Table S54.** Demirci station Kaplan-Meier survival estimates according to SPEI-3

| Kaplan-Meier Wet to Dry (SPEI3) |        |         |          |         |              |              |
|---------------------------------|--------|---------|----------|---------|--------------|--------------|
|                                 |        | n       | events   | median  | 0.95LCL      | 0.95UCL      |
|                                 |        | 133     | 133      | 9       | 8            | 11           |
| time                            | n.risk | n.event | survival | std.err | lower 95% CI | upper 95% CI |
| 1                               | 133    | 4       | 0.96992  | 0.01481 | 0.94133      | 0.9994       |
| 2                               | 129    | 2       | 0.95489  | 0.018   | 0.92026      | 0.9908       |
| 3                               | 127    | 9       | 0.88722  | 0.02743 | 0.83505      | 0.9426       |
| 4                               | 118    | 13      | 0.78947  | 0.03535 | 0.72314      | 0.8619       |
| 5                               | 105    | 9       | 0.7218   | 0.03886 | 0.64953      | 0.8021       |

|    |    |    |         |         |         |        |
|----|----|----|---------|---------|---------|--------|
| 6  | 96 | 10 | 0.64662 | 0.04145 | 0.57027 | 0.7332 |
| 7  | 86 | 8  | 0.58647 | 0.0427  | 0.50847 | 0.6764 |
| 8  | 78 | 8  | 0.52632 | 0.0433  | 0.44795 | 0.6184 |
| 9  | 70 | 6  | 0.4812  | 0.04332 | 0.40336 | 0.5741 |
| 10 | 64 | 5  | 0.44361 | 0.04308 | 0.36672 | 0.5366 |
| 11 | 59 | 5  | 0.40602 | 0.04258 | 0.33057 | 0.4987 |
| 12 | 54 | 3  | 0.38346 | 0.04216 | 0.30912 | 0.4757 |
| 13 | 51 | 4  | 0.35338 | 0.04145 | 0.28081 | 0.4447 |
| 14 | 47 | 4  | 0.32331 | 0.04056 | 0.25283 | 0.4134 |
| 15 | 43 | 5  | 0.28571 | 0.03917 | 0.21839 | 0.3738 |
| 16 | 38 | 3  | 0.26316 | 0.03818 | 0.19802 | 0.3497 |
| 17 | 35 | 3  | 0.2406  | 0.03706 | 0.1779  | 0.3254 |
| 18 | 32 | 2  | 0.22556 | 0.03624 | 0.16463 | 0.3091 |
| 19 | 30 | 4  | 0.19549 | 0.03439 | 0.13848 | 0.276  |
| 20 | 26 | 3  | 0.17293 | 0.03279 | 0.11925 | 0.2508 |
| 21 | 23 | 2  | 0.15789 | 0.03162 | 0.10664 | 0.2338 |
| 22 | 21 | 1  | 0.15038 | 0.03099 | 0.1004  | 0.2252 |
| 23 | 20 | 1  | 0.14286 | 0.03034 | 0.09421 | 0.2166 |
| 24 | 19 | 2  | 0.12782 | 0.02895 | 0.082   | 0.1993 |
| 25 | 17 | 3  | 0.10526 | 0.02661 | 0.06413 | 0.1728 |
| 26 | 14 | 3  | 0.08271 | 0.02388 | 0.04696 | 0.1457 |
| 27 | 11 | 3  | 0.06015 | 0.02062 | 0.03072 | 0.1178 |
| 28 | 8  | 2  | 0.04511 | 0.018   | 0.02064 | 0.0986 |
| 29 | 6  | 1  | 0.03759 | 0.01649 | 0.01591 | 0.0888 |
| 30 | 5  | 1  | 0.03008 | 0.01481 | 0.01146 | 0.079  |
| 31 | 4  | 2  | 0.01504 | 0.01055 | 0.0038  | 0.0595 |
| 32 | 2  | 1  | 0.00752 | 0.00749 | 0.00107 | 0.053  |
| 76 | 1  | 1  | 0       | NaN     | NA      | NA     |

**Table S55.** Demirci station Kaplan-Meier survival estimates according to SPEI-6

| Kaplan-Meier Wet to Dry (SPEI6) |        |         |          |         |              |              |
|---------------------------------|--------|---------|----------|---------|--------------|--------------|
|                                 |        | n       | events   | median  | 0.95LCL      | 0.95UCL      |
|                                 |        | 116     | 116      | 13      | 11           | 16           |
| time                            | n.risk | n.event | survival | std.err | lower 95% CI | upper 95% CI |
| 1                               | 116    | 3       | 0.97414  | 0.01474 | 0.94568      | 1            |
| 2                               | 113    | 5       | 0.93103  | 0.02353 | 0.88605      | 0.9783       |
| 3                               | 108    | 3       | 0.90517  | 0.0272  | 0.8534       | 0.9601       |
| 4                               | 105    | 3       | 0.87931  | 0.03025 | 0.82198      | 0.9406       |
| 5                               | 102    | 3       | 0.85345  | 0.03284 | 0.79146      | 0.9203       |
| 6                               | 99     | 7       | 0.7931   | 0.03761 | 0.72271      | 0.8704       |
| 7                               | 92     | 8       | 0.72414  | 0.0415  | 0.6472       | 0.8102       |
| 8                               | 84     | 6       | 0.67241  | 0.04358 | 0.59221      | 0.7635       |
| 9                               | 78     | 4       | 0.63793  | 0.04462 | 0.5562       | 0.7317       |

|     |    |   |         |         |         |        |
|-----|----|---|---------|---------|---------|--------|
| 10  | 74 | 6 | 0.58621 | 0.04573 | 0.5031  | 0.683  |
| 11  | 68 | 4 | 0.55172 | 0.04617 | 0.46826 | 0.6501 |
| 12  | 64 | 4 | 0.51724 | 0.0464  | 0.43385 | 0.6167 |
| 13  | 60 | 4 | 0.48276 | 0.0464  | 0.39987 | 0.5828 |
| 14  | 56 | 3 | 0.4569  | 0.04625 | 0.37467 | 0.5572 |
| 15  | 53 | 4 | 0.42241 | 0.04586 | 0.34145 | 0.5226 |
| 16  | 49 | 6 | 0.37069 | 0.04484 | 0.29244 | 0.4699 |
| 17  | 43 | 6 | 0.31897 | 0.04327 | 0.24449 | 0.4161 |
| 18  | 37 | 4 | 0.28448 | 0.04189 | 0.21317 | 0.3797 |
| 19  | 33 | 3 | 0.25862 | 0.04066 | 0.19004 | 0.3519 |
| 20  | 30 | 3 | 0.23276 | 0.03924 | 0.16727 | 0.3239 |
| 21  | 27 | 3 | 0.2069  | 0.03761 | 0.14488 | 0.2955 |
| 22  | 24 | 2 | 0.18966 | 0.0364  | 0.1302  | 0.2763 |
| 23  | 22 | 1 | 0.18103 | 0.03575 | 0.12293 | 0.2666 |
| 24  | 21 | 2 | 0.16379 | 0.03436 | 0.10857 | 0.2471 |
| 25  | 19 | 1 | 0.15517 | 0.03362 | 0.10149 | 0.2373 |
| 26  | 18 | 1 | 0.14655 | 0.03284 | 0.09446 | 0.2274 |
| 27  | 17 | 1 | 0.13793 | 0.03202 | 0.08751 | 0.2174 |
| 28  | 16 | 2 | 0.12069 | 0.03025 | 0.07385 | 0.1972 |
| 29  | 14 | 3 | 0.09483 | 0.0272  | 0.05405 | 0.1664 |
| 30  | 11 | 2 | 0.07759 | 0.02484 | 0.04143 | 0.1453 |
| 31  | 9  | 1 | 0.06897 | 0.02353 | 0.03534 | 0.1346 |
| 32  | 8  | 1 | 0.06034 | 0.02211 | 0.02943 | 0.1237 |
| 37  | 7  | 1 | 0.05172 | 0.02056 | 0.02373 | 0.1127 |
| 38  | 6  | 1 | 0.0431  | 0.01886 | 0.01829 | 0.1016 |
| 42  | 5  | 1 | 0.03448 | 0.01694 | 0.01316 | 0.0903 |
| 43  | 4  | 1 | 0.02586 | 0.01474 | 0.00846 | 0.079  |
| 44  | 3  | 1 | 0.01724 | 0.01209 | 0.00436 | 0.0681 |
| 45  | 2  | 1 | 0.00862 | 0.00858 | 0.00122 | 0.0607 |
| 103 | 1  | 1 | 0       | NaN     | NA      | NA     |

**Table S56.** Demirci station Kaplan-Meier survival estimates according to SPEI-12

| Kaplan-Meier Wet to Dry (SPEI12) |        |         |          |         |                 |                 |
|----------------------------------|--------|---------|----------|---------|-----------------|-----------------|
|                                  |        | n       | events   | median  | 0.95LCL         | 0.95UCL         |
|                                  |        | 119     | 119      | 24      | 18              | 28              |
| time                             | n.risk | n.event | survival | std.err | lower 95%<br>CI | upper 95%<br>CI |
| 1                                | 119    | 2       | 0.9832   | 0.01178 | 0.96037         | 1               |
| 2                                | 117    | 3       | 0.958    | 0.01839 | 0.92261         | 0.9947          |
| 3                                | 114    | 3       | 0.9328   | 0.02296 | 0.88885         | 0.9789          |
| 4                                | 111    | 4       | 0.8992   | 0.0276  | 0.84665         | 0.9549          |
| 5                                | 107    | 3       | 0.8739   | 0.03043 | 0.81631         | 0.9357          |
| 6                                | 104    | 5       | 0.8319   | 0.03428 | 0.76739         | 0.9019          |
| 7                                | 99     | 4       | 0.7983   | 0.03678 | 0.72939         | 0.8738          |

|     |    |   |        |         |         |        |
|-----|----|---|--------|---------|---------|--------|
| 8   | 95 | 4 | 0.7647 | 0.03888 | 0.69217 | 0.8448 |
| 9   | 91 | 2 | 0.7479 | 0.0398  | 0.67381 | 0.8301 |
| 10  | 89 | 2 | 0.7311 | 0.04065 | 0.65562 | 0.8153 |
| 11  | 87 | 1 | 0.7227 | 0.04104 | 0.64657 | 0.8078 |
| 12  | 86 | 2 | 0.7059 | 0.04177 | 0.62859 | 0.7927 |
| 13  | 84 | 3 | 0.6807 | 0.04274 | 0.60186 | 0.7698 |
| 14  | 81 | 3 | 0.6555 | 0.04356 | 0.57541 | 0.7467 |
| 15  | 78 | 4 | 0.6218 | 0.04445 | 0.54055 | 0.7154 |
| 16  | 74 | 2 | 0.605  | 0.04481 | 0.52329 | 0.6996 |
| 17  | 72 | 2 | 0.5882 | 0.04512 | 0.50614 | 0.6837 |
| 18  | 70 | 2 | 0.5714 | 0.04536 | 0.48909 | 0.6676 |
| 19  | 68 | 1 | 0.563  | 0.04547 | 0.4806  | 0.6596 |
| 20  | 67 | 1 | 0.5546 | 0.04556 | 0.47214 | 0.6515 |
| 21  | 66 | 2 | 0.5378 | 0.0457  | 0.4553  | 0.6353 |
| 22  | 64 | 1 | 0.5294 | 0.04576 | 0.44692 | 0.6271 |
| 23  | 63 | 2 | 0.5126 | 0.04582 | 0.43023 | 0.6108 |
| 24  | 61 | 3 | 0.4874 | 0.04582 | 0.40538 | 0.586  |
| 25  | 58 | 3 | 0.4622 | 0.0457  | 0.38075 | 0.561  |
| 26  | 55 | 3 | 0.437  | 0.04547 | 0.35636 | 0.5358 |
| 27  | 52 | 2 | 0.4202 | 0.04525 | 0.34022 | 0.5189 |
| 28  | 50 | 4 | 0.3866 | 0.04464 | 0.30826 | 0.4847 |
| 29  | 46 | 3 | 0.3613 | 0.04404 | 0.28457 | 0.4588 |
| 30  | 43 | 2 | 0.3445 | 0.04356 | 0.26891 | 0.4414 |
| 31  | 41 | 2 | 0.3277 | 0.04303 | 0.25337 | 0.4239 |
| 32  | 39 | 2 | 0.3109 | 0.04243 | 0.23795 | 0.4063 |
| 33  | 37 | 1 | 0.3025 | 0.04211 | 0.23029 | 0.3974 |
| 34  | 36 | 2 | 0.2857 | 0.04141 | 0.21506 | 0.3796 |
| 35  | 34 | 3 | 0.2605 | 0.04023 | 0.19246 | 0.3526 |
| 36  | 31 | 3 | 0.2353 | 0.03888 | 0.17019 | 0.3253 |
| 37  | 28 | 2 | 0.2185 | 0.03788 | 0.15554 | 0.3069 |
| 38  | 26 | 2 | 0.2017 | 0.03678 | 0.14107 | 0.2883 |
| 39  | 24 | 2 | 0.1849 | 0.03559 | 0.12677 | 0.2696 |
| 40  | 22 | 2 | 0.1681 | 0.03428 | 0.11269 | 0.2507 |
| 41  | 20 | 2 | 0.1513 | 0.03285 | 0.09883 | 0.2315 |
| 42  | 18 | 2 | 0.1345 | 0.03127 | 0.08523 | 0.2121 |
| 43  | 16 | 2 | 0.1176 | 0.02954 | 0.07193 | 0.1924 |
| 44  | 14 | 2 | 0.1008 | 0.0276  | 0.05897 | 0.1724 |
| 45  | 12 | 2 | 0.084  | 0.02543 | 0.04643 | 0.1521 |
| 46  | 10 | 2 | 0.0672 | 0.02296 | 0.03443 | 0.1313 |
| 47  | 8  | 1 | 0.0588 | 0.02157 | 0.02867 | 0.1207 |
| 48  | 7  | 1 | 0.0504 | 0.02006 | 0.02312 | 0.11   |
| 49  | 6  | 1 | 0.042  | 0.01839 | 0.01782 | 0.0991 |
| 97  | 5  | 1 | 0.0336 | 0.01652 | 0.01283 | 0.0881 |
| 98  | 4  | 1 | 0.0252 | 0.01437 | 0.00825 | 0.0771 |
| 100 | 3  | 1 | 0.0168 | 0.01178 | 0.00425 | 0.0664 |

|     |   |   |        |         |         |        |
|-----|---|---|--------|---------|---------|--------|
| 101 | 2 | 1 | 0.0084 | 0.00837 | 0.00119 | 0.0592 |
| 102 | 1 | 1 | 0      | NaN     | NA      | NA     |

**Table S57.** Demirci station Kaplan-Meier drought risk estimates according to SPEI-3, 6, and 12

| Drought Risk (SPEI3) |              | Drought Risk (SPEI6) |              | Drought Risk (SPEI12) |              |
|----------------------|--------------|----------------------|--------------|-----------------------|--------------|
| Time                 | Drought Risk | Time                 | Drought Risk | Time                  | Drought Risk |
| 1                    | 0.03008      | 1                    | 0.02586      | 1                     | 0.0168       |
| 2                    | 0.04511      | 2                    | 0.06897      | 2                     | 0.042        |
| 3                    | 0.11278      | 3                    | 0.09483      | 3                     | 0.0672       |
| 4                    | 0.21053      | 4                    | 0.12069      | 4                     | 0.1008       |
| 5                    | 0.2782       | 5                    | 0.14655      | 5                     | 0.1261       |
| 6                    | 0.35338      | 6                    | 0.2069       | 6                     | 0.1681       |
| 7                    | 0.41353      | 7                    | 0.27586      | 7                     | 0.2017       |
| 8                    | 0.47368      | 8                    | 0.32759      | 8                     | 0.2353       |
| 9                    | 0.5188       | 9                    | 0.36207      | 9                     | 0.2521       |
| 10                   | 0.55639      | 10                   | 0.41379      | 10                    | 0.2689       |
| 11                   | 0.59398      | 11                   | 0.44828      | 11                    | 0.2773       |
| 12                   | 0.61654      | 12                   | 0.48276      | 12                    | 0.2941       |
| 13                   | 0.64662      | 13                   | 0.51724      | 13                    | 0.3193       |
| 14                   | 0.67669      | 14                   | 0.5431       | 14                    | 0.3445       |
| 15                   | 0.71429      | 15                   | 0.57759      | 15                    | 0.3782       |
| 16                   | 0.73684      | 16                   | 0.62931      | 16                    | 0.395        |
| 17                   | 0.7594       | 17                   | 0.68103      | 17                    | 0.4118       |
| 18                   | 0.77444      | 18                   | 0.71552      | 18                    | 0.4286       |
| 19                   | 0.80451      | 19                   | 0.74138      | 19                    | 0.437        |
| 20                   | 0.82707      | 20                   | 0.76724      | 20                    | 0.4454       |
| 21                   | 0.84211      | 21                   | 0.7931       | 21                    | 0.4622       |
| 22                   | 0.84962      | 22                   | 0.81034      | 22                    | 0.4706       |
| 23                   | 0.85714      | 23                   | 0.81897      | 23                    | 0.4874       |
| 24                   | 0.87218      | 24                   | 0.83621      | 24                    | 0.5126       |
| 25                   | 0.89474      | 25                   | 0.84483      | 25                    | 0.5378       |
| 26                   | 0.91729      | 26                   | 0.85345      | 26                    | 0.563        |
| 27                   | 0.93985      | 27                   | 0.86207      | 27                    | 0.5798       |
| 28                   | 0.95489      | 28                   | 0.87931      | 28                    | 0.6134       |
| 29                   | 0.96241      | 29                   | 0.90517      | 29                    | 0.6387       |
| 30                   | 0.96992      | 30                   | 0.92241      | 30                    | 0.6555       |
| 31                   | 0.98496      | 31                   | 0.93103      | 31                    | 0.6723       |
| 32                   | 0.99248      | 32                   | 0.93966      | 32                    | 0.6891       |
| 76                   | 1            | 37                   | 0.94828      | 33                    | 0.6975       |
|                      |              | 38                   | 0.9569       | 34                    | 0.7143       |
|                      |              | 42                   | 0.96552      | 35                    | 0.7395       |
|                      |              | 43                   | 0.97414      | 36                    | 0.7647       |
|                      |              | 44                   | 0.98276      | 37                    | 0.7815       |
|                      |              | 45                   | 0.99138      | 38                    | 0.7983       |

|     |   |     |        |
|-----|---|-----|--------|
| 103 | 1 | 39  | 0.8151 |
|     |   | 40  | 0.8319 |
|     |   | 41  | 0.8487 |
|     |   | 42  | 0.8655 |
|     |   | 43  | 0.8824 |
|     |   | 44  | 0.8992 |
|     |   | 45  | 0.916  |
|     |   | 46  | 0.9328 |
|     |   | 47  | 0.9412 |
|     |   | 48  | 0.9496 |
|     |   | 49  | 0.958  |
|     |   | 97  | 0.9664 |
|     |   | 98  | 0.9748 |
|     |   | 100 | 0.9832 |
|     |   | 101 | 0.9916 |
|     |   | 102 | 1      |

**Table S58.** Esme station Kaplan-Meier survival estimates according to SPI-3

| Kaplan-Meier Wet to Dry (SPI3) |        |         |          |         |              |              |
|--------------------------------|--------|---------|----------|---------|--------------|--------------|
|                                |        | n       | events   | median  | 0.95LCL      | 0.95UCL      |
|                                |        | 61      | 61       | 8       | 7            | 10           |
| time                           | n.risk | n.event | survival | std.err | lower 95% CL | upper 95% CL |
| 1                              | 61     | 3       | 0.9508   | 0.0277  | 0.89807      | 1            |
| 2                              | 58     | 3       | 0.9016   | 0.0381  | 0.82992      | 0.98         |
| 3                              | 55     | 4       | 0.8361   | 0.0474  | 0.74814      | 0.934        |
| 4                              | 51     | 6       | 0.7377   | 0.0563  | 0.63518      | 0.857        |
| 5                              | 45     | 4       | 0.6721   | 0.0601  | 0.56407      | 0.801        |
| 6                              | 41     | 3       | 0.623    | 0.0621  | 0.51247      | 0.757        |
| 7                              | 38     | 5       | 0.541    | 0.0638  | 0.42933      | 0.682        |
| 8                              | 33     | 5       | 0.459    | 0.0638  | 0.34955      | 0.603        |
| 9                              | 28     | 5       | 0.377    | 0.0621  | 0.27309      | 0.521        |
| 10                             | 23     | 4       | 0.3115   | 0.0593  | 0.21448      | 0.452        |
| 11                             | 19     | 3       | 0.2623   | 0.0563  | 0.17219      | 0.4          |
| 12                             | 16     | 3       | 0.2131   | 0.0524  | 0.13158      | 0.345        |
| 13                             | 13     | 2       | 0.1803   | 0.0492  | 0.10561      | 0.308        |
| 16                             | 11     | 1       | 0.1639   | 0.0474  | 0.09301      | 0.289        |
| 17                             | 10     | 2       | 0.1311   | 0.0432  | 0.06875      | 0.25         |
| 18                             | 8      | 1       | 0.1148   | 0.0408  | 0.05716      | 0.23         |
| 21                             | 7      | 2       | 0.082    | 0.0351  | 0.03539      | 0.19         |
| 22                             | 5      | 1       | 0.0656   | 0.0317  | 0.02543      | 0.169        |
| 23                             | 4      | 1       | 0.0492   | 0.0277  | 0.01631      | 0.148        |
| 29                             | 3      | 1       | 0.0328   | 0.0228  | 0.00839      | 0.128        |
| 53                             | 2      | 1       | 0.0164   | 0.0163  | 0.00235      | 0.115        |

|    |   |   |   |     |    |    |
|----|---|---|---|-----|----|----|
| 64 | 1 | 1 | 0 | NaN | NA | NA |
|----|---|---|---|-----|----|----|

**Table S59.** Esme station Kaplan-Meier survival estimates according to SPI-6

| Kaplan-Meier Wet to Dry (SPI6) |        |         |          |         |              |              |
|--------------------------------|--------|---------|----------|---------|--------------|--------------|
|                                |        | n       | events   | median  | 0.95LCL      | 0.95UCL      |
|                                |        | 73      | 73       | 15      | 13           | 18           |
| time                           | n.risk | n.event | survival | std.err | lower 95% CL | upper 95% CL |
| 1                              | 73     | 3       | 0.9589   | 0.0232  | 0.91443      | 1            |
| 2                              | 70     | 5       | 0.8904   | 0.0366  | 0.82156      | 0.965        |
| 3                              | 65     | 4       | 0.8356   | 0.0434  | 0.75478      | 0.9251       |
| 4                              | 61     | 2       | 0.8082   | 0.0461  | 0.72277      | 0.9038       |
| 5                              | 59     | 2       | 0.7808   | 0.0484  | 0.69146      | 0.8817       |
| 6                              | 57     | 2       | 0.7534   | 0.0504  | 0.66076      | 0.8591       |
| 7                              | 55     | 1       | 0.7397   | 0.0514  | 0.64562      | 0.8476       |
| 9                              | 54     | 2       | 0.7123   | 0.053   | 0.6157       | 0.8241       |
| 10                             | 52     | 1       | 0.6986   | 0.0537  | 0.60092      | 0.8122       |
| 11                             | 51     | 2       | 0.6712   | 0.055   | 0.57168      | 0.7881       |
| 12                             | 49     | 4       | 0.6164   | 0.0569  | 0.5144       | 0.7387       |
| 13                             | 45     | 2       | 0.589    | 0.0576  | 0.48633      | 0.7134       |
| 14                             | 43     | 4       | 0.5342   | 0.0584  | 0.43124      | 0.6619       |
| 15                             | 39     | 3       | 0.4932   | 0.0585  | 0.39082      | 0.6223       |
| 16                             | 36     | 4       | 0.4384   | 0.0581  | 0.33811      | 0.5683       |
| 17                             | 32     | 3       | 0.3973   | 0.0573  | 0.29947      | 0.527        |
| 18                             | 29     | 5       | 0.3288   | 0.055   | 0.23688      | 0.4563       |
| 19                             | 24     | 3       | 0.2877   | 0.053   | 0.20051      | 0.4127       |
| 20                             | 21     | 1       | 0.274    | 0.0522  | 0.18859      | 0.398        |
| 21                             | 20     | 1       | 0.2603   | 0.0514  | 0.1768       | 0.3832       |
| 22                             | 19     | 2       | 0.2329   | 0.0495  | 0.15357      | 0.3531       |
| 23                             | 17     | 1       | 0.2192   | 0.0484  | 0.14215      | 0.3379       |
| 24                             | 16     | 1       | 0.2055   | 0.0473  | 0.13088      | 0.3226       |
| 25                             | 15     | 1       | 0.1918   | 0.0461  | 0.11975      | 0.3071       |
| 26                             | 14     | 1       | 0.1781   | 0.0448  | 0.10879      | 0.2915       |
| 27                             | 13     | 1       | 0.1644   | 0.0434  | 0.098        | 0.2757       |
| 28                             | 12     | 2       | 0.137    | 0.0402  | 0.07702      | 0.2436       |
| 29                             | 10     | 1       | 0.1233   | 0.0385  | 0.06687      | 0.2273       |
| 74                             | 9      | 1       | 0.1096   | 0.0366  | 0.05699      | 0.2107       |
| 75                             | 8      | 1       | 0.0959   | 0.0345  | 0.04741      | 0.1939       |
| 76                             | 7      | 1       | 0.0822   | 0.0321  | 0.03819      | 0.1769       |
| 77                             | 6      | 1       | 0.0685   | 0.0296  | 0.02939      | 0.1596       |
| 78                             | 5      | 1       | 0.0548   | 0.0266  | 0.02113      | 0.1421       |
| 89                             | 4      | 1       | 0.0411   | 0.0232  | 0.01357      | 0.1245       |

|    |   |   |        |        |         |        |
|----|---|---|--------|--------|---------|--------|
| 90 | 3 | 1 | 0.0274 | 0.0191 | 0.00698 | 0.1075 |
| 91 | 2 | 1 | 0.0137 | 0.0136 | 0.00196 | 0.0959 |
| 92 | 1 | 1 | 0      | NaN    | NA      | NA     |

**Table S60.** Esme station Kaplan-Meier survival estimates according to SPI-12

| Kaplan-Meier Wet to Dry (SPI12) |        |         |          |         |              |              |
|---------------------------------|--------|---------|----------|---------|--------------|--------------|
|                                 |        | n       | events   | median  | 0.95LCL      | 0.95UCL      |
|                                 |        | 61      | 61       | 22      | 17           | 31           |
| time                            | n.risk | n.event | survival | std.err | lower 95% CL | upper 95% CL |
| 0                               | 61     | 1       | 0.9836   | 0.0163  | 0.95225      | 1            |
| 2                               | 60     | 1       | 0.9672   | 0.0228  | 0.92354      | 1            |
| 3                               | 59     | 1       | 0.9508   | 0.0277  | 0.89807      | 1            |
| 11                              | 58     | 1       | 0.9344   | 0.0317  | 0.87433      | 0.999        |
| 12                              | 57     | 2       | 0.9016   | 0.0381  | 0.82992      | 0.98         |
| 13                              | 55     | 3       | 0.8525   | 0.0454  | 0.76795      | 0.946        |
| 14                              | 52     | 4       | 0.7869   | 0.0524  | 0.69055      | 0.897        |
| 15                              | 48     | 4       | 0.7213   | 0.0574  | 0.61713      | 0.843        |
| 16                              | 44     | 4       | 0.6557   | 0.0608  | 0.54672      | 0.786        |
| 17                              | 40     | 3       | 0.6066   | 0.0625  | 0.49556      | 0.742        |
| 18                              | 37     | 2       | 0.5738   | 0.0633  | 0.46217      | 0.712        |
| 19                              | 35     | 2       | 0.541    | 0.0638  | 0.42933      | 0.682        |
| 20                              | 33     | 1       | 0.5246   | 0.0639  | 0.41311      | 0.666        |
| 21                              | 32     | 1       | 0.5082   | 0.064   | 0.39703      | 0.65         |
| 22                              | 31     | 1       | 0.4918   | 0.064   | 0.38107      | 0.635        |
| 23                              | 30     | 1       | 0.4754   | 0.0639  | 0.36525      | 0.619        |
| 24                              | 29     | 1       | 0.459    | 0.0638  | 0.34955      | 0.603        |
| 25                              | 28     | 1       | 0.4426   | 0.0636  | 0.33399      | 0.587        |
| 26                              | 27     | 1       | 0.4262   | 0.0633  | 0.31856      | 0.57         |
| 27                              | 26     | 1       | 0.4098   | 0.063   | 0.30327      | 0.554        |
| 28                              | 25     | 1       | 0.3934   | 0.0625  | 0.28811      | 0.537        |
| 29                              | 24     | 1       | 0.377    | 0.0621  | 0.27309      | 0.521        |
| 30                              | 23     | 1       | 0.3607   | 0.0615  | 0.25822      | 0.504        |
| 31                              | 22     | 1       | 0.3443   | 0.0608  | 0.24349      | 0.487        |
| 32                              | 21     | 1       | 0.3279   | 0.0601  | 0.22891      | 0.47         |
| 36                              | 20     | 1       | 0.3115   | 0.0593  | 0.21448      | 0.452        |
| 37                              | 19     | 1       | 0.2951   | 0.0584  | 0.20021      | 0.435        |
| 54                              | 18     | 1       | 0.2787   | 0.0574  | 0.18612      | 0.417        |
| 55                              | 17     | 1       | 0.2623   | 0.0563  | 0.17219      | 0.4          |
| 56                              | 16     | 1       | 0.2459   | 0.0551  | 0.15846      | 0.382        |
| 57                              | 15     | 1       | 0.2295   | 0.0538  | 0.14491      | 0.363        |
| 58                              | 14     | 1       | 0.2131   | 0.0524  | 0.13158      | 0.345        |



|     |    |   |        |        |         |       |
|-----|----|---|--------|--------|---------|-------|
| 59  | 13 | 1 | 0.1967 | 0.0509 | 0.11847 | 0.327 |
| 60  | 12 | 1 | 0.1803 | 0.0492 | 0.10561 | 0.308 |
| 61  | 11 | 1 | 0.1639 | 0.0474 | 0.09301 | 0.289 |
| 72  | 10 | 1 | 0.1475 | 0.0454 | 0.08071 | 0.27  |
| 73  | 9  | 1 | 0.1311 | 0.0432 | 0.06875 | 0.25  |
| 74  | 8  | 1 | 0.1148 | 0.0408 | 0.05716 | 0.23  |
| 113 | 7  | 1 | 0.0984 | 0.0381 | 0.04601 | 0.21  |
| 114 | 6  | 1 | 0.082  | 0.0351 | 0.03539 | 0.19  |
| 115 | 5  | 1 | 0.0656 | 0.0317 | 0.02543 | 0.169 |
| 116 | 4  | 1 | 0.0492 | 0.0277 | 0.01631 | 0.148 |
| 117 | 3  | 1 | 0.0328 | 0.0228 | 0.00839 | 0.128 |
| 118 | 2  | 1 | 0.0164 | 0.0163 | 0.00235 | 0.115 |
| 119 | 1  | 1 | 0      | NaN    | NA      | NA    |

**Table S61.** Esme station Kaplan-Meier drought risk estimates according to SPI-3, 6, and 12

| Drought Risk (SPI3) |              | Drought Risk (SPI6) |              | Drought Risk (SPI12) |              |
|---------------------|--------------|---------------------|--------------|----------------------|--------------|
| Time                | Drought Risk | Time                | Drought Risk | Time                 | Drought Risk |
| 1                   | 0.0492       | 1                   | 0.0411       | 0                    | 0.0164       |
| 2                   | 0.0984       | 2                   | 0.1096       | 2                    | 0.0328       |
| 3                   | 0.1639       | 3                   | 0.1644       | 3                    | 0.0492       |
| 4                   | 0.2623       | 4                   | 0.1918       | 6                    | 0.05535      |
| 5                   | 0.3279       | 5                   | 0.2192       | 11                   | 0.0656       |
| 6                   | 0.377        | 6                   | 0.2466       | 12                   | 0.0984       |
| 7                   | 0.459        | 7                   | 0.2603       | 13                   | 0.1475       |
| 8                   | 0.541        | 9                   | 0.2877       | 14                   | 0.2131       |
| 9                   | 0.623        | 10                  | 0.3014       | 15                   | 0.2787       |
| 10                  | 0.6885       | 11                  | 0.3288       | 16                   | 0.3443       |
| 11                  | 0.7377       | 12                  | 0.3836       | 17                   | 0.3934       |
| 12                  | 0.7869       | 13                  | 0.411        | 18                   | 0.4262       |
| 13                  | 0.8197       | 14                  | 0.4658       | 19                   | 0.459        |
| 16                  | 0.8361       | 15                  | 0.5068       | 20                   | 0.4754       |
| 17                  | 0.8689       | 16                  | 0.5616       | 21                   | 0.4918       |
| 18                  | 0.8852       | 17                  | 0.6027       | 22                   | 0.5082       |
| 21                  | 0.918        | 18                  | 0.6712       | 23                   | 0.5246       |
| 22                  | 0.9344       | 19                  | 0.7123       | 24                   | 0.541        |
| 23                  | 0.9508       | 20                  | 0.726        | 25                   | 0.5574       |
| 29                  | 0.9672       | 21                  | 0.7397       | 26                   | 0.5738       |
| 53                  | 0.9836       | 22                  | 0.7671       | 27                   | 0.5902       |
| 64                  | 1            | 23                  | 0.7808       | 28                   | 0.6066       |
|                     |              | 24                  | 0.7945       | 29                   | 0.623        |
|                     |              | 25                  | 0.8082       | 30                   | 0.6393       |
|                     |              | 26                  | 0.8219       | 31                   | 0.6557       |
|                     |              | 27                  | 0.8356       | 32                   | 0.6721       |
|                     |              | 28                  | 0.863        | 36                   | 0.6885       |

|    |        |     |        |
|----|--------|-----|--------|
| 29 | 0.8767 | 37  | 0.7049 |
| 74 | 0.8904 | 54  | 0.7213 |
| 75 | 0.9041 | 55  | 0.7377 |
| 76 | 0.9178 | 56  | 0.7541 |
| 77 | 0.9315 | 57  | 0.7705 |
| 78 | 0.9452 | 58  | 0.7869 |
| 89 | 0.9589 | 59  | 0.8033 |
| 90 | 0.9726 | 60  | 0.8197 |
| 91 | 0.9863 | 61  | 0.8361 |
| 92 | 1      | 72  | 0.8525 |
|    |        | 73  | 0.8689 |
|    |        | 74  | 0.8852 |
|    |        | 113 | 0.9016 |
|    |        | 114 | 0.918  |
|    |        | 115 | 0.9344 |
|    |        | 116 | 0.9508 |
|    |        | 117 | 0.9672 |
|    |        | 118 | 0.9836 |
|    |        | 119 | 1      |

**Table S62.** Esme station Kaplan-Meier survival estimates according to SPEI-3

| Kaplan-Meier Wet to Dry (SPEI3) |        |         |          |         |              |              |
|---------------------------------|--------|---------|----------|---------|--------------|--------------|
|                                 |        | n       | events   | median  | 0.95LCL      | 0.95UCL      |
|                                 |        | 75      | 75       | 11      | 9            | 13           |
| time                            | n.risk | n.event | survival | std.err | lower 95% CI | upper 95% CI |
| 1                               | 75     | 2       | 0.9733   | 0.0186  | 0.93755      | 10.000       |
| 2                               | 73     | 2       | 0.9467   | 0.0259  | 0.89716      | 0.9989       |
| 3                               | 71     | 1       | 0.9333   | 0.0288  | 0.87855      | 0.9915       |
| 4                               | 70     | 3       | 0.8933   | 0.0356  | 0.82613      | 0.966        |
| 5                               | 67     | 3       | 0.8533   | 0.0409  | 0.77691      | 0.9373       |
| 6                               | 64     | 3       | 0.8133   | 0.045   | 0.72976      | 0.9065       |
| 7                               | 61     | 6       | 0.7333   | 0.0511  | 0.63978      | 0.8406       |
| 8                               | 55     | 6       | 0.6533   | 0.055   | 0.55404      | 0.7704       |
| 9                               | 49     | 5       | 0.5867   | 0.0569  | 0.48517      | 0.7094       |
| 10                              | 44     | 6       | 0.5067   | 0.0577  | 0.40526      | 0.6334       |
| 11                              | 38     | 4       | 0.4533   | 0.0575  | 0.35358      | 0.5812       |
| 12                              | 34     | 3       | 0.4133   | 0.0569  | 0.31565      | 0.5412       |
| 13                              | 31     | 4       | 0.36     | 0.0554  | 0.26623      | 0.4868       |
| 14                              | 27     | 3       | 0.32     | 0.0539  | 0.23008      | 0.4451       |
| 15                              | 24     | 3       | 0.28     | 0.0518  | 0.19478      | 0.4025       |
| 16                              | 21     | 3       | 0.24     | 0.0493  | 0.16044      | 0.359        |
| 17                              | 18     | 3       | 0.2      | 0.0462  | 0.12719      | 0.3145       |
| 18                              | 15     | 3       | 0.16     | 0.0423  | 0.09526      | 0.2687       |

|    |    |   |        |        |         |        |
|----|----|---|--------|--------|---------|--------|
| 19 | 12 | 4 | 0.1067 | 0.0356 | 0.05541 | 0.2053 |
| 20 | 8  | 1 | 0.0933 | 0.0336 | 0.0461  | 0.189  |
| 22 | 7  | 2 | 0.0667 | 0.0288 | 0.02859 | 0.1555 |
| 23 | 5  | 2 | 0.04   | 0.0226 | 0.0132  | 0.1212 |
| 35 | 3  | 1 | 0.0267 | 0.0186 | 0.00679 | 0.1047 |
| 47 | 2  | 1 | 0.0133 | 0.0132 | 0.0019  | 0.0934 |
| 48 | 1  | 1 | 0      | NaN    | NA      | NA     |

**Table S63.** Esme station Kaplan-Meier survival estimates according to SPEI-6

| Kaplan-Meier Wet to Dry (SPEI6) |        |         |          |         |              |              |
|---------------------------------|--------|---------|----------|---------|--------------|--------------|
|                                 |        | n       | events   | median  | 0.95LCL      | 0.95UCL      |
|                                 |        | 77      | 77       | 15      | 13           | 17           |
| time                            | n.risk | n.event | survival | std.err | lower 95% CI | upper 95% CI |
| 1                               | 77     | 4       | 0.9481   | 0.0253  | 0.89976      | 0.999        |
| 2                               | 73     | 5       | 0.8831   | 0.0366  | 0.81419      | 0.958        |
| 3                               | 68     | 3       | 0.8442   | 0.0413  | 0.76691      | 0.929        |
| 4                               | 65     | 3       | 0.8052   | 0.0451  | 0.72142      | 0.899        |
| 5                               | 62     | 2       | 0.7792   | 0.0473  | 0.69187      | 0.878        |
| 6                               | 60     | 3       | 0.7403   | 0.05    | 0.64852      | 0.845        |
| 7                               | 57     | 1       | 0.7273   | 0.0508  | 0.6343       | 0.834        |
| 8                               | 56     | 2       | 0.7013   | 0.0522  | 0.60617      | 0.811        |
| 9                               | 54     | 1       | 0.6883   | 0.0528  | 0.59226      | 0.8          |
| 10                              | 53     | 1       | 0.6753   | 0.0534  | 0.57843      | 0.788        |
| 11                              | 52     | 3       | 0.6364   | 0.0548  | 0.5375       | 0.753        |
| 12                              | 49     | 2       | 0.6104   | 0.0556  | 0.51063      | 0.73         |
| 13                              | 47     | 2       | 0.5844   | 0.0562  | 0.48408      | 0.706        |
| 14                              | 45     | 3       | 0.5455   | 0.0567  | 0.44484      | 0.669        |
| 15                              | 42     | 4       | 0.4935   | 0.057   | 0.39357      | 0.619        |
| 16                              | 38     | 5       | 0.4286   | 0.0564  | 0.33114      | 0.555        |
| 17                              | 33     | 6       | 0.3506   | 0.0544  | 0.25874      | 0.475        |
| 18                              | 27     | 7       | 0.2597   | 0.05    | 0.17815      | 0.379        |
| 19                              | 20     | 5       | 0.1948   | 0.0451  | 0.1237       | 0.307        |
| 20                              | 15     | 4       | 0.1429   | 0.0399  | 0.08266      | 0.247        |
| 21                              | 11     | 2       | 0.1169   | 0.0366  | 0.06326      | 0.216        |
| 22                              | 9      | 1       | 0.1039   | 0.0348  | 0.05392      | 0.2          |
| 23                              | 8      | 1       | 0.0909   | 0.0328  | 0.04486      | 0.184        |
| 28                              | 7      | 1       | 0.0779   | 0.0305  | 0.03614      | 0.168        |
| 29                              | 6      | 1       | 0.0649   | 0.0281  | 0.02782      | 0.152        |
| 34                              | 5      | 1       | 0.0519   | 0.0253  | 0.02001      | 0.135        |
| 37                              | 4      | 1       | 0.039    | 0.0221  | 0.01285      | 0.118        |
| 74                              | 3      | 1       | 0.026    | 0.0181  | 0.00661      | 0.102        |
| 75                              | 2      | 1       | 0.013    | 0.0129  | 0.00185      | 0.091        |
| 76                              | 1      | 1       | 0        | NaN     | NA           | NA           |

**Table S64.** Esme station Kaplan-Meier survival estimates according to SPEI-12

| Kaplan-Meier Wet to Dry (SPEI12) |        |         |          |         |              |              |
|----------------------------------|--------|---------|----------|---------|--------------|--------------|
|                                  |        | n       | events   | median  | 0.95LCL      | 0.95UCL      |
|                                  |        | 82      | 82       | 18.5    | 16           | 21           |
| time                             | n.risk | n.event | survival | std.err | lower 95% CI | upper 95% CI |
| 1                                | 82     | 3       | 0.9634   | 0.0207  | 0.92362      | 10.000       |
| 6                                | 79     | 1       | 0.9512   | 0.0238  | 0.90572      | 0.999        |
| 7                                | 78     | 1       | 0.939    | 0.0264  | 0.88864      | 0.9923       |
| 8                                | 77     | 1       | 0.9268   | 0.0288  | 0.87214      | 0.9849       |
| 9                                | 76     | 1       | 0.9146   | 0.0309  | 0.85611      | 0.9772       |
| 10                               | 75     | 2       | 0.8902   | 0.0345  | 0.82509      | 0.9605       |
| 11                               | 73     | 3       | 0.8537   | 0.039   | 0.78049      | 0.9337       |
| 12                               | 70     | 5       | 0.7927   | 0.0448  | 0.70962      | 0.8855       |
| 13                               | 65     | 4       | 0.7439   | 0.0482  | 0.65518      | 0.8446       |
| 14                               | 61     | 4       | 0.6951   | 0.0508  | 0.60229      | 0.8023       |
| 15                               | 57     | 4       | 0.6463   | 0.0528  | 0.55072      | 0.7586       |
| 16                               | 53     | 5       | 0.5854   | 0.0544  | 0.48788      | 0.7023       |
| 17                               | 48     | 4       | 0.5366   | 0.0551  | 0.43882      | 0.6561       |
| 18                               | 44     | 3       | 0.5      | 0.0552  | 0.40269      | 0.6208       |
| 19                               | 41     | 4       | 0.4512   | 0.055   | 0.3554       | 0.5729       |
| 20                               | 37     | 3       | 0.4146   | 0.0544  | 0.32061      | 0.5362       |
| 21                               | 34     | 3       | 0.378    | 0.0535  | 0.2864       | 0.499        |
| 22                               | 31     | 2       | 0.3537   | 0.0528  | 0.26394      | 0.4739       |
| 23                               | 29     | 2       | 0.3293   | 0.0519  | 0.24176      | 0.4484       |
| 24                               | 27     | 3       | 0.2927   | 0.0502  | 0.20906      | 0.4098       |
| 25                               | 24     | 2       | 0.2683   | 0.0489  | 0.18766      | 0.3836       |
| 26                               | 22     | 1       | 0.2561   | 0.0482  | 0.17709      | 0.3703       |
| 27                               | 21     | 1       | 0.2439   | 0.0474  | 0.16661      | 0.357        |
| 28                               | 20     | 1       | 0.2317   | 0.0466  | 0.15623      | 0.3436       |
| 29                               | 19     | 1       | 0.2195   | 0.0457  | 0.14595      | 0.3301       |
| 30                               | 18     | 1       | 0.2073   | 0.0448  | 0.13578      | 0.3165       |
| 31                               | 17     | 1       | 0.1951   | 0.0438  | 0.12572      | 0.3028       |
| 32                               | 16     | 1       | 0.1829   | 0.0427  | 0.11577      | 0.289        |
| 33                               | 15     | 1       | 0.1707   | 0.0416  | 0.10596      | 0.2751       |
| 34                               | 14     | 1       | 0.1585   | 0.0403  | 0.09629      | 0.261        |
| 35                               | 13     | 1       | 0.1463   | 0.039   | 0.08676      | 0.2468       |
| 36                               | 12     | 1       | 0.1341   | 0.0376  | 0.0774       | 0.2325       |
| 37                               | 11     | 1       | 0.122    | 0.0361  | 0.06823      | 0.218        |
| 41                               | 10     | 1       | 0.1098   | 0.0345  | 0.05925      | 0.2033       |
| 64                               | 9      | 1       | 0.0976   | 0.0328  | 0.05051      | 0.1884       |
| 65                               | 8      | 1       | 0.0854   | 0.0309  | 0.04203      | 0.1734       |
| 66                               | 7      | 1       | 0.0732   | 0.0288  | 0.03387      | 0.1581       |

|    |   |   |        |        |         |        |
|----|---|---|--------|--------|---------|--------|
| 67 | 6 | 1 | 0.061  | 0.0264 | 0.02608 | 0.1426 |
| 68 | 5 | 1 | 0.0488 | 0.0238 | 0.01876 | 0.1269 |
| 69 | 4 | 1 | 0.0366 | 0.0207 | 0.01205 | 0.1111 |
| 72 | 3 | 1 | 0.0244 | 0.017  | 0.0062  | 0.0959 |
| 73 | 2 | 1 | 0.0122 | 0.0121 | 0.00174 | 0.0855 |
| 74 | 1 | 1 | 0      | NaN    | NA      | NA     |

**Table S65.** Esme station Kaplan-Meier drought risk estimates according to SPEI-3, 6, and 12

| Drought Risk (SPEI3) |              | Drought Risk (SPEI6) |              | Drought Risk (SPEI12) |              |
|----------------------|--------------|----------------------|--------------|-----------------------|--------------|
| Time                 | Drought Risk | Time                 | Drought Risk | Time                  | Drought Risk |
| 1                    | 0.0267       | 1                    | 0.0519       | 1                     | 0.0366       |
| 2                    | 0.0533       | 2                    | 0.1169       | 3                     | 0.04148      |
| 3                    | 0.0667       | 3                    | 0.1558       | 6                     | 0.0488       |
| 4                    | 0.1067       | 4                    | 0.1948       | 7                     | 0.061        |
| 5                    | 0.1467       | 5                    | 0.2208       | 8                     | 0.0732       |
| 6                    | 0.1867       | 6                    | 0.2597       | 9                     | 0.0854       |
| 7                    | 0.2667       | 7                    | 0.2727       | 10                    | 0.1098       |
| 8                    | 0.3467       | 8                    | 0.2987       | 11                    | 0.1463       |
| 9                    | 0.4133       | 9                    | 0.3117       | 12                    | 0.2073       |
| 10                   | 0.4933       | 10                   | 0.3247       | 13                    | 0.2561       |
| 11                   | 0.5467       | 11                   | 0.3636       | 14                    | 0.3049       |
| 12                   | 0.5867       | 12                   | 0.3896       | 15                    | 0.3537       |
| 13                   | 0.64         | 13                   | 0.4156       | 16                    | 0.4146       |
| 14                   | 0.68         | 14                   | 0.4545       | 17                    | 0.4634       |
| 15                   | 0.72         | 15                   | 0.5065       | 18                    | 0.5          |
| 16                   | 0.76         | 16                   | 0.5714       | 19                    | 0.5488       |
| 17                   | 0.8          | 17                   | 0.6494       | 20                    | 0.5854       |
| 18                   | 0.84         | 18                   | 0.7403       | 21                    | 0.622        |
| 19                   | 0.8933       | 19                   | 0.8052       | 22                    | 0.6463       |
| 20                   | 0.9067       | 20                   | 0.8571       | 23                    | 0.6707       |
| 22                   | 0.9333       | 21                   | 0.8831       | 24                    | 0.7073       |
| 23                   | 0.96         | 22                   | 0.8961       | 25                    | 0.7317       |
| 35                   | 0.9733       | 23                   | 0.9091       | 26                    | 0.7439       |
| 47                   | 0.9867       | 28                   | 0.9221       | 27                    | 0.7561       |
| 48                   | 1            | 29                   | 0.9351       | 28                    | 0.7683       |
|                      |              | 34                   | 0.9481       | 29                    | 0.7805       |
|                      |              | 37                   | 0.961        | 30                    | 0.7927       |
|                      |              | 74                   | 0.974        | 31                    | 0.8049       |
|                      |              | 75                   | 0.987        | 32                    | 0.8171       |
|                      |              | 76                   | 1            | 33                    | 0.8293       |

|    |        |
|----|--------|
| 34 | 0.8415 |
| 35 | 0.8537 |
| 36 | 0.8659 |
| 37 | 0.878  |
| 41 | 0.8902 |
| 64 | 0.9024 |
| 65 | 0.9146 |
| 66 | 0.9268 |
| 67 | 0.939  |
| 68 | 0.9512 |
| 69 | 0.9634 |
| 72 | 0.9756 |
| 73 | 0.9878 |
| 74 | 1      |

**Table S66.** Foca station Kaplan-Meier survival estimates according to SPI-3

| Kaplan-Meier Wet to Dry (SPI3) |        |         |          |         |              |              |
|--------------------------------|--------|---------|----------|---------|--------------|--------------|
|                                |        | n       | events   | median  | 0.95LCL      | 0.95UCL      |
|                                |        | 66      | 66       | 8.5     | 6            | 10           |
| time                           | n.risk | n.event | survival | std.err | lower 95% CL | upper 95% CL |
| 0                              | 66     | 1       | 0.9848   | 0.015   | 0.95581      | 1            |
| 1                              | 65     | 5       | 0.9091   | 0.0354  | 0.84231      | 0.981        |
| 2                              | 60     | 4       | 0.8485   | 0.0441  | 0.76625      | 0.94         |
| 3                              | 56     | 6       | 0.7576   | 0.0528  | 0.66093      | 0.868        |
| 4                              | 50     | 5       | 0.6818   | 0.0573  | 0.57822      | 0.804        |
| 5                              | 45     | 4       | 0.6212   | 0.0597  | 0.51455      | 0.75         |
| 6                              | 41     | 2       | 0.5909   | 0.0605  | 0.48344      | 0.722        |
| 7                              | 39     | 1       | 0.5758   | 0.0608  | 0.46806      | 0.708        |
| 8                              | 38     | 5       | 0.5      | 0.0615  | 0.39282      | 0.636        |
| 9                              | 33     | 8       | 0.3788   | 0.0597  | 0.27811      | 0.516        |
| 10                             | 25     | 6       | 0.2879   | 0.0557  | 0.19698      | 0.421        |
| 11                             | 19     | 5       | 0.2121   | 0.0503  | 0.13325      | 0.338        |
| 12                             | 14     | 2       | 0.1818   | 0.0475  | 0.10899      | 0.303        |
| 13                             | 12     | 2       | 0.1515   | 0.0441  | 0.08561      | 0.268        |
| 14                             | 10     | 2       | 0.1212   | 0.0402  | 0.0633       | 0.232        |
| 15                             | 8      | 3       | 0.0758   | 0.0326  | 0.03262      | 0.176        |
| 16                             | 5      | 1       | 0.0606   | 0.0294  | 0.02344      | 0.157        |
| 23                             | 4      | 1       | 0.0455   | 0.0256  | 0.01505      | 0.137        |
| 26                             | 3      | 1       | 0.0303   | 0.0211  | 0.00774      | 0.119        |
| 27                             | 2      | 1       | 0.0152   | 0.015   | 0.00217      | 0.106        |
| 38                             | 1      | 1       | 0        | NaN     | NA           | NA           |

**Table S67.** Foca station Kaplan-Meier survival estimates according to SPI-6

| Kaplan-Meier Wet to Dry (SPI6) |        |         |          |         |              |              |
|--------------------------------|--------|---------|----------|---------|--------------|--------------|
|                                |        | n       | events   | median  | 0.95LCL      | 0.95UCL      |
|                                |        | 70      | 70       | 11      | 9            | 13           |
| time                           | n.risk | n.event | survival | std.err | lower 95% CL | upper 95% CL |
| 1                              | 70     | 7       | 0.9      | 0.0359  | 0.8324       | 0.973        |
| 2                              | 63     | 5       | 0.8286   | 0.045   | 0.74482      | 0.922        |
| 3                              | 58     | 5       | 0.7571   | 0.0513  | 0.66307      | 0.865        |
| 4                              | 53     | 1       | 0.7429   | 0.0522  | 0.64721      | 0.853        |
| 6                              | 52     | 3       | 0.7      | 0.0548  | 0.60047      | 0.816        |
| 7                              | 49     | 2       | 0.6714   | 0.0561  | 0.56994      | 0.791        |
| 8                              | 47     | 4       | 0.6143   | 0.0582  | 0.51021      | 0.74         |
| 9                              | 43     | 3       | 0.5714   | 0.0591  | 0.4665       | 0.7          |
| 10                             | 40     | 4       | 0.5143   | 0.0597  | 0.40957      | 0.646        |
| 11                             | 36     | 3       | 0.4714   | 0.0597  | 0.36786      | 0.604        |
| 12                             | 33     | 5       | 0.4      | 0.0586  | 0.30023      | 0.533        |
| 13                             | 28     | 7       | 0.3      | 0.0548  | 0.20976      | 0.429        |
| 14                             | 21     | 4       | 0.2429   | 0.0513  | 0.16059      | 0.367        |
| 15                             | 17     | 3       | 0.2      | 0.0478  | 0.12519      | 0.32         |
| 16                             | 14     | 1       | 0.1857   | 0.0465  | 0.11371      | 0.303        |
| 17                             | 13     | 1       | 0.1714   | 0.045   | 0.10243      | 0.287        |
| 19                             | 12     | 2       | 0.1429   | 0.0418  | 0.08048      | 0.254        |
| 20                             | 10     | 2       | 0.1143   | 0.038   | 0.05953      | 0.219        |
| 23                             | 8      | 1       | 0.1      | 0.0359  | 0.04952      | 0.202        |
| 26                             | 7      | 1       | 0.0857   | 0.0335  | 0.03988      | 0.184        |
| 27                             | 6      | 1       | 0.0714   | 0.0308  | 0.03069      | 0.166        |
| 28                             | 5      | 1       | 0.0571   | 0.0277  | 0.02206      | 0.148        |
| 29                             | 4      | 1       | 0.0429   | 0.0242  | 0.01417      | 0.13         |
| 39                             | 3      | 1       | 0.0286   | 0.0199  | 0.00729      | 0.112        |
| 41                             | 2      | 1       | 0.0143   | 0.0142  | 0.00204      | 0.1          |
| 42                             | 1      | 1       | 0        | NaN     | NA           | NA           |

**Table S68.** Foca station Kaplan-Meier survival estimates according to SPI-12

| Kaplan-Meier Wet to Dry (SPI12) |        |         |          |         |              |              |
|---------------------------------|--------|---------|----------|---------|--------------|--------------|
|                                 |        | n       | events   | median  | 0.95LCL      | 0.95UCL      |
|                                 |        | 64      | 64       | 10.5    | 7            | 19           |
| time                            | n.risk | n.event | survival | std.err | lower 95% CL | upper 95% CL |
| 0                               | 64     | 1       | 0.9844   | 0.0155  | 0.95445      | 1            |
| 1                               | 63     | 4       | 0.9219   | 0.0335  | 0.85842      | 0.99         |
| 2                               | 59     | 4       | 0.8594   | 0.0435  | 0.77829      | 0.949        |
| 3                               | 55     | 5       | 0.7812   | 0.0517  | 0.68626      | 0.889        |

|    |    |   |        |        |         |       |
|----|----|---|--------|--------|---------|-------|
| 4  | 50 | 4 | 0.7188 | 0.0562 | 0.61662 | 0.838 |
| 5  | 46 | 4 | 0.6562 | 0.0594 | 0.54962 | 0.784 |
| 6  | 42 | 2 | 0.625  | 0.0605 | 0.51697 | 0.756 |
| 7  | 40 | 2 | 0.5938 | 0.0614 | 0.48483 | 0.727 |
| 8  | 38 | 2 | 0.5625 | 0.062  | 0.4532  | 0.698 |
| 9  | 36 | 1 | 0.5469 | 0.0622 | 0.43756 | 0.684 |
| 10 | 35 | 3 | 0.5    | 0.0625 | 0.39135 | 0.639 |
| 11 | 32 | 2 | 0.4688 | 0.0624 | 0.36114 | 0.608 |
| 13 | 30 | 1 | 0.4531 | 0.0622 | 0.3462  | 0.593 |
| 16 | 29 | 1 | 0.4375 | 0.062  | 0.33138 | 0.578 |
| 17 | 28 | 1 | 0.4219 | 0.0617 | 0.31669 | 0.562 |
| 18 | 27 | 2 | 0.3906 | 0.061  | 0.28765 | 0.53  |
| 19 | 25 | 2 | 0.3594 | 0.06   | 0.25911 | 0.498 |
| 20 | 23 | 3 | 0.3125 | 0.0579 | 0.21729 | 0.449 |
| 21 | 20 | 2 | 0.2812 | 0.0562 | 0.19011 | 0.416 |
| 22 | 18 | 1 | 0.2656 | 0.0552 | 0.17675 | 0.399 |
| 23 | 17 | 1 | 0.25   | 0.0541 | 0.16355 | 0.382 |
| 24 | 16 | 1 | 0.2344 | 0.053  | 0.15052 | 0.365 |
| 25 | 15 | 2 | 0.2031 | 0.0503 | 0.12503 | 0.33  |
| 27 | 13 | 1 | 0.1875 | 0.0488 | 0.11259 | 0.312 |
| 28 | 12 | 1 | 0.1719 | 0.0472 | 0.10038 | 0.294 |
| 29 | 11 | 1 | 0.1562 | 0.0454 | 0.08842 | 0.276 |
| 36 | 10 | 1 | 0.1406 | 0.0435 | 0.07674 | 0.258 |
| 43 | 9  | 1 | 0.125  | 0.0413 | 0.06537 | 0.239 |
| 44 | 8  | 1 | 0.1094 | 0.039  | 0.05436 | 0.22  |
| 45 | 7  | 1 | 0.0938 | 0.0364 | 0.04377 | 0.201 |
| 46 | 6  | 1 | 0.0781 | 0.0335 | 0.03367 | 0.181 |
| 47 | 5  | 1 | 0.0625 | 0.0303 | 0.0242  | 0.161 |
| 48 | 4  | 1 | 0.0469 | 0.0264 | 0.01553 | 0.141 |
| 70 | 3  | 1 | 0.0312 | 0.0217 | 0.00799 | 0.122 |
| 71 | 2  | 1 | 0.0156 | 0.0155 | 0.00224 | 0.109 |
| 72 | 1  | 1 | 0      | NaN    | NA      | NA    |

**Table S69.** Foca station Kaplan-Meier drought risk estimates according to SPI-3, 6, and 12

| Drought Risk (SPI3) |              | Drought Risk (SPI6) |              | Drought Risk (SPI12) |              |
|---------------------|--------------|---------------------|--------------|----------------------|--------------|
| Time                | Drought Risk | Time                | Drought Risk | Time                 | Drought Risk |
| 0                   | 0.0152       | 1                   | 0.1          | 0                    | 0.0156       |
| 1                   | 0.0909       | 2                   | 0.1714       | 1                    | 0.0781       |
| 2                   | 0.1515       | 3                   | 0.2429       | 2                    | 0.1406       |
| 3                   | 0.2424       | 4                   | 0.2571       | 3                    | 0.2188       |
| 4                   | 0.3182       | 6                   | 0.3          | 4                    | 0.2812       |
| 5                   | 0.3788       | 7                   | 0.3286       | 5                    | 0.3438       |
| 6                   | 0.4091       | 8                   | 0.3857       | 6                    | 0.375        |
| 7                   | 0.4242       | 9                   | 0.4286       | 7                    | 0.4062       |



|    |        |    |        |    |         |
|----|--------|----|--------|----|---------|
| 8  | 0.5    | 10 | 0.4857 | 8  | 0.4375  |
| 9  | 0.6212 | 11 | 0.5286 | 9  | 0.4531  |
| 10 | 0.7121 | 12 | 0.6    | 10 | 0.5     |
| 11 | 0.7879 | 13 | 0.7    | 11 | 0.5312  |
| 12 | 0.8182 | 14 | 0.7571 | 12 | 0.53905 |
| 13 | 0.8485 | 15 | 0.8    | 13 | 0.5469  |
| 14 | 0.8788 | 16 | 0.8143 | 16 | 0.5625  |
| 15 | 0.9242 | 17 | 0.8286 | 17 | 0.5781  |
| 16 | 0.9394 | 19 | 0.8571 | 18 | 0.6094  |
| 23 | 0.9545 | 20 | 0.8857 | 19 | 0.6406  |
| 26 | 0.9697 | 23 | 0.9    | 20 | 0.6875  |
| 27 | 0.9848 | 26 | 0.9143 | 21 | 0.7188  |
| 38 | 1      | 27 | 0.9286 | 22 | 0.7344  |
|    |        | 28 | 0.9429 | 23 | 0.75    |
|    |        | 29 | 0.9571 | 24 | 0.7656  |
|    |        | 39 | 0.9714 | 25 | 0.7969  |
|    |        | 41 | 0.9857 | 27 | 0.8125  |
|    |        | 42 | 1      | 28 | 0.8281  |
|    |        |    |        | 29 | 0.8438  |
|    |        |    |        | 36 | 0.8594  |
|    |        |    |        | 43 | 0.875   |
|    |        |    |        | 44 | 0.8906  |
|    |        |    |        | 45 | 0.9062  |
|    |        |    |        | 46 | 0.9219  |
|    |        |    |        | 47 | 0.9375  |
|    |        |    |        | 48 | 0.9531  |
|    |        |    |        | 70 | 0.9688  |
|    |        |    |        | 71 | 0.9844  |
|    |        |    |        | 72 | 1       |

**Table S70.** Foca station Kaplan-Meier survival estimates according to SPEI-3

| Kaplan-Meier Wet to Dry (SPEI3) |        |         |          |         |              |              |
|---------------------------------|--------|---------|----------|---------|--------------|--------------|
|                                 |        | n       | events   | median  | 0.95LCL      | 0.95UCL      |
|                                 |        | 81      | 81       | 7       | 5            | 9            |
| time                            | n.risk | n.event | survival | std.err | lower 95% CI | upper 95% CI |
| 0                               | 81     | 1       | 0.9877   | 0.0123  | 0.9639       | 10.000       |
| 1                               | 80     | 9       | 0.8765   | 0.0366  | 0.80775      | 0.9512       |
| 2                               | 71     | 5       | 0.8148   | 0.0432  | 0.73446      | 0.904        |
| 3                               | 66     | 9       | 0.7037   | 0.0507  | 0.61097      | 0.8105       |
| 4                               | 57     | 4       | 0.6543   | 0.0528  | 0.55853      | 0.7665       |
| 5                               | 53     | 6       | 0.5802   | 0.0548  | 0.48214      | 0.6983       |
| 6                               | 47     | 5       | 0.5185   | 0.0555  | 0.42037      | 0.6396       |
| 7                               | 42     | 7       | 0.4321   | 0.055   | 0.33663      | 0.5546       |

|    |    |   |        |        |         |        |
|----|----|---|--------|--------|---------|--------|
| 8  | 35 | 3 | 0.3951 | 0.0543 | 0.30174 | 0.5172 |
| 9  | 32 | 4 | 0.3457 | 0.0528 | 0.25618 | 0.4664 |
| 10 | 28 | 5 | 0.284  | 0.0501 | 0.20093 | 0.4013 |
| 11 | 23 | 4 | 0.2346 | 0.0471 | 0.15828 | 0.3476 |
| 12 | 19 | 3 | 0.1975 | 0.0442 | 0.12735 | 0.3064 |
| 14 | 16 | 1 | 0.1852 | 0.0432 | 0.11728 | 0.2924 |
| 15 | 15 | 2 | 0.1605 | 0.0408 | 0.09753 | 0.2641 |
| 16 | 13 | 2 | 0.1358 | 0.0381 | 0.0784  | 0.2352 |
| 17 | 11 | 4 | 0.0864 | 0.0312 | 0.04257 | 0.1754 |
| 18 | 7  | 1 | 0.0741 | 0.0291 | 0.0343  | 0.16   |
| 20 | 6  | 1 | 0.0617 | 0.0267 | 0.02641 | 0.1443 |
| 21 | 5  | 1 | 0.0494 | 0.0241 | 0.01899 | 0.1284 |
| 38 | 4  | 1 | 0.037  | 0.021  | 0.0122  | 0.1124 |
| 39 | 3  | 1 | 0.0247 | 0.0172 | 0.00628 | 0.097  |
| 40 | 2  | 1 | 0.0123 | 0.0123 | 0.00176 | 0.0866 |
| 41 | 1  | 1 | 0      | NaN    | NA      | NA     |

**Table S71.** Foca station Kaplan-Meier survival estimates according to SPEI-6

| Kaplan-Meier Wet to Dry (SPEI6) |        |         |          |         |              |              |
|---------------------------------|--------|---------|----------|---------|--------------|--------------|
|                                 |        | n       | events   | median  | 0.95LCL      | 0.95UCL      |
|                                 |        | 85      | 85       | 10      | 8            | 12           |
| time                            | n.risk | n.event | survival | std.err | lower 95% CI | upper 95% CI |
| 0                               | 85     | 1       | 0.9882   | 0.0117  | 0.96558      | 10.000       |
| 1                               | 84     | 8       | 0.8941   | 0.0334  | 0.83104      | 0.962        |
| 2                               | 76     | 5       | 0.8353   | 0.0402  | 0.76005      | 0.918        |
| 3                               | 71     | 3       | 0.8      | 0.0434  | 0.71933      | 0.8897       |
| 4                               | 68     | 2       | 0.7765   | 0.0452  | 0.69277      | 0.8703       |
| 5                               | 66     | 2       | 0.7529   | 0.0468  | 0.66661      | 0.8504       |
| 6                               | 64     | 6       | 0.6824   | 0.0505  | 0.59022      | 0.7889       |
| 7                               | 58     | 7       | 0.6      | 0.0531  | 0.50439      | 0.7137       |
| 8                               | 51     | 3       | 0.5647   | 0.0538  | 0.46856      | 0.6806       |
| 9                               | 48     | 5       | 0.5059   | 0.0542  | 0.41002      | 0.6242       |
| 10                              | 43     | 5       | 0.4471   | 0.0539  | 0.35293      | 0.5663       |
| 11                              | 38     | 5       | 0.3882   | 0.0529  | 0.2973       | 0.507        |
| 12                              | 33     | 5       | 0.3294   | 0.051   | 0.24323      | 0.4461       |
| 13                              | 28     | 4       | 0.2824   | 0.0488  | 0.20119      | 0.3963       |
| 14                              | 24     | 2       | 0.2588   | 0.0475  | 0.18062      | 0.3709       |
| 18                              | 22     | 1       | 0.2471   | 0.0468  | 0.17046      | 0.3581       |
| 19                              | 21     | 2       | 0.2235   | 0.0452  | 0.1504       | 0.3322       |
| 20                              | 19     | 1       | 0.2118   | 0.0443  | 0.14052      | 0.3191       |
| 22                              | 18     | 1       | 0.2      | 0.0434  | 0.13073      | 0.306        |
| 23                              | 17     | 2       | 0.1765   | 0.0413  | 0.11149      | 0.2793       |
| 24                              | 15     | 2       | 0.1529   | 0.039   | 0.09274      | 0.2522       |
| 26                              | 13     | 1       | 0.1412   | 0.0378  | 0.08357      | 0.2385       |

|    |    |   |        |        |         |        |
|----|----|---|--------|--------|---------|--------|
| 27 | 12 | 1 | 0.1294 | 0.0364 | 0.07456 | 0.2246 |
| 28 | 11 | 1 | 0.1176 | 0.0349 | 0.06573 | 0.2106 |
| 29 | 10 | 1 | 0.1059 | 0.0334 | 0.05709 | 0.1964 |
| 38 | 9  | 1 | 0.0941 | 0.0317 | 0.04867 | 0.182  |
| 39 | 8  | 1 | 0.0824 | 0.0298 | 0.0405  | 0.1674 |
| 40 | 7  | 1 | 0.0706 | 0.0278 | 0.03264 | 0.1527 |
| 41 | 6  | 1 | 0.0588 | 0.0255 | 0.02513 | 0.1377 |
| 42 | 5  | 1 | 0.0471 | 0.023  | 0.01808 | 0.1225 |
| 63 | 4  | 1 | 0.0353 | 0.02   | 0.01161 | 0.1072 |
| 64 | 3  | 1 | 0.0235 | 0.0164 | 0.00598 | 0.0926 |
| 65 | 2  | 1 | 0.0118 | 0.0117 | 0.00168 | 0.0826 |
| 66 | 1  | 1 | 0      | NaN    | NA      | NA     |

**Table S72.** Foca station Kaplan-Meier survival estimates according to SPEI-12

| Kaplan-Meier Wet to Dry (SPEI12) |        |         |          |         |              |              |
|----------------------------------|--------|---------|----------|---------|--------------|--------------|
|                                  |        | n       | events   | median  | 0.95LCL      | 0.95UCL      |
|                                  |        | 72      | 72       | 13.5    | 9            | 18           |
| time                             | n.risk | n.event | survival | std.err | lower 95% CI | upper 95% CI |
| 0                                | 72     | 1       | 0.9861   | 0.0138  | 0.95945      | 10.000       |
| 1                                | 71     | 5       | 0.9167   | 0.0326  | 0.855        | 0.9828       |
| 2                                | 66     | 3       | 0.875    | 0.039   | 0.80185      | 0.9548       |
| 3                                | 63     | 3       | 0.8333   | 0.0439  | 0.75155      | 0.924        |
| 4                                | 60     | 4       | 0.7778   | 0.049   | 0.68744      | 0.88         |
| 5                                | 56     | 3       | 0.7361   | 0.0519  | 0.64103      | 0.8453       |
| 6                                | 53     | 3       | 0.6944   | 0.0543  | 0.59579      | 0.8094       |
| 7                                | 50     | 4       | 0.6389   | 0.0566  | 0.53704      | 0.7601       |
| 8                                | 46     | 2       | 0.6111   | 0.0575  | 0.50827      | 0.7348       |
| 9                                | 44     | 1       | 0.5972   | 0.0578  | 0.49403      | 0.722        |
| 10                               | 43     | 2       | 0.5694   | 0.0584  | 0.46583      | 0.6961       |
| 11                               | 41     | 1       | 0.5556   | 0.0586  | 0.45186      | 0.683        |
| 12                               | 40     | 3       | 0.5139   | 0.0589  | 0.41049      | 0.6433       |
| 13                               | 37     | 1       | 0.5      | 0.0589  | 0.39688      | 0.6299       |
| 14                               | 36     | 1       | 0.4861   | 0.0589  | 0.38335      | 0.6164       |
| 15                               | 35     | 2       | 0.4583   | 0.0587  | 0.35656      | 0.5892       |
| 16                               | 33     | 3       | 0.4167   | 0.0581  | 0.31703      | 0.5476       |
| 17                               | 30     | 3       | 0.375    | 0.0571  | 0.27831      | 0.5053       |
| 18                               | 27     | 3       | 0.3333   | 0.0556  | 0.24044      | 0.4621       |
| 19                               | 24     | 3       | 0.2917   | 0.0536  | 0.2035       | 0.418        |

|    |    |   |        |        |         |        |
|----|----|---|--------|--------|---------|--------|
| 20 | 21 | 4 | 0.2361 | 0.0501 | 0.15584 | 0.3577 |
| 21 | 17 | 2 | 0.2083 | 0.0479 | 0.1328  | 0.3268 |
| 22 | 15 | 1 | 0.1944 | 0.0466 | 0.12151 | 0.3112 |
| 23 | 14 | 1 | 0.1806 | 0.0453 | 0.11038 | 0.2953 |
| 24 | 13 | 1 | 0.1667 | 0.0439 | 0.09943 | 0.2794 |
| 25 | 12 | 1 | 0.1528 | 0.0424 | 0.08868 | 0.2632 |
| 26 | 11 | 1 | 0.1389 | 0.0408 | 0.07814 | 0.2469 |
| 27 | 10 | 2 | 0.1111 | 0.037  | 0.05781 | 0.2135 |
| 28 | 8  | 1 | 0.0972 | 0.0349 | 0.04809 | 0.1965 |
| 32 | 7  | 1 | 0.0833 | 0.0326 | 0.03874 | 0.1793 |
| 33 | 6  | 1 | 0.0694 | 0.03   | 0.02981 | 0.1618 |
| 34 | 5  | 1 | 0.0556 | 0.027  | 0.02143 | 0.144  |
| 63 | 4  | 1 | 0.0417 | 0.0235 | 0.01376 | 0.1261 |
| 65 | 3  | 1 | 0.0278 | 0.0194 | 0.00708 | 0.1089 |
| 66 | 2  | 1 | 0.0139 | 0.0138 | 0.00198 | 0.0973 |
| 67 | 1  | 1 | 0      | NaN    | NA      | NA     |

**Table S73.** Foca station Kaplan-Meier drought risk estimates according to SPEI-3, 6, and 12

| Drought Risk (SPEI3) |              | Drought Risk (SPEI6) |              | Drought Risk (SPEI12) |              |
|----------------------|--------------|----------------------|--------------|-----------------------|--------------|
| Time                 | Drought Risk | Time                 | Drought Risk | Time                  | Drought Risk |
| 0                    | 0.0123       | 0                    | 0.0118       | 0                     | 0.0139       |
| 1                    | 0.1235       | 1                    | 0.1059       | 1                     | 0.0833       |
| 2                    | 0.1852       | 2                    | 0.1647       | 2                     | 0.125        |
| 3                    | 0.2963       | 3                    | 0.2          | 3                     | 0.1667       |
| 4                    | 0.3457       | 4                    | 0.2235       | 4                     | 0.2222       |
| 5                    | 0.4198       | 5                    | 0.2471       | 5                     | 0.2639       |
| 6                    | 0.4815       | 6                    | 0.3176       | 6                     | 0.3056       |
| 7                    | 0.5679       | 7                    | 0.4          | 7                     | 0.3611       |
| 8                    | 0.6049       | 8                    | 0.4353       | 8                     | 0.3889       |
| 9                    | 0.6543       | 9                    | 0.4941       | 9                     | 0.4028       |
| 10                   | 0.716        | 10                   | 0.5529       | 10                    | 0.4306       |
| 11                   | 0.7654       | 11                   | 0.6118       | 11                    | 0.4444       |
| 12                   | 0.8025       | 12                   | 0.6706       | 12                    | 0.4861       |
| 14                   | 0.8148       | 13                   | 0.7176       | 13                    | 0.5          |
| 15                   | 0.8395       | 14                   | 0.7412       | 14                    | 0.5139       |
| 16                   | 0.8642       | 18                   | 0.7529       | 15                    | 0.5417       |
| 17                   | 0.9136       | 19                   | 0.7765       | 16                    | 0.5833       |
| 18                   | 0.9259       | 20                   | 0.7882       | 17                    | 0.625        |
| 20                   | 0.9383       | 22                   | 0.8          | 18                    | 0.6667       |
| 21                   | 0.9506       | 23                   | 0.8235       | 19                    | 0.7083       |
| 38                   | 0.963        | 24                   | 0.8471       | 20                    | 0.7639       |
| 39                   | 0.9753       | 26                   | 0.8588       | 21                    | 0.7917       |
| 40                   | 0.9877       | 27                   | 0.8706       | 22                    | 0.8056       |
| 41                   | 1            | 28                   | 0.8824       | 23                    | 0.8194       |
|                      |              | 29                   | 0.8941       | 24                    | 0.8333       |
|                      |              | 38                   | 0.9059       | 25                    | 0.8472       |
|                      |              | 39                   | 0.9176       | 26                    | 0.8611       |
|                      |              | 40                   | 0.9294       | 27                    | 0.8889       |
|                      |              | 41                   | 0.9412       | 28                    | 0.9028       |
|                      |              | 42                   | 0.9529       | 32                    | 0.9167       |
|                      |              | 63                   | 0.9647       | 33                    | 0.9306       |
|                      |              | 64                   | 0.9765       | 34                    | 0.9444       |
|                      |              | 65                   | 0.9882       | 63                    | 0.9583       |
|                      |              | 66                   | 1            | 65                    | 0.9722       |
|                      |              |                      |              | 66                    | 0.9861       |
|                      |              |                      |              | 67                    | 1            |

**Table S74.** Gediz station Kaplan-Meier survival estimates according to SPI-3

| Kaplan-Meier Wet to Dry (SPI3) |        |         |          |         |              |              |
|--------------------------------|--------|---------|----------|---------|--------------|--------------|
|                                |        | n       | events   | median  | 0.95LCL      | 0.95UCL      |
|                                |        | 106     | 106      | 7       | 6            | 9            |
| time                           | n.risk | n.event | survival | std.err | lower 95% CL | upper 95% CL |
| 1                              | 106    | 6       | 0.9434   | 0.02244 | 0.90042      | 0.9884       |
| 2                              | 100    | 5       | 0.89623  | 0.02962 | 0.84001      | 0.9562       |
| 3                              | 95     | 6       | 0.83962  | 0.03564 | 0.77259      | 0.9125       |
| 4                              | 89     | 11      | 0.73585  | 0.04282 | 0.65653      | 0.8248       |
| 5                              | 78     | 11      | 0.63208  | 0.04684 | 0.54663      | 0.7309       |
| 6                              | 67     | 10      | 0.53774  | 0.04843 | 0.45073      | 0.6415       |
| 7                              | 57     | 5       | 0.49057  | 0.04856 | 0.40406      | 0.5956       |
| 8                              | 52     | 7       | 0.42453  | 0.04801 | 0.34013      | 0.5299       |
| 9                              | 45     | 8       | 0.34906  | 0.0463  | 0.26915      | 0.4527       |
| 10                             | 37     | 7       | 0.28302  | 0.04375 | 0.20904      | 0.3832       |
| 11                             | 30     | 5       | 0.23585  | 0.04123 | 0.16742      | 0.3322       |
| 13                             | 25     | 3       | 0.20755  | 0.03939 | 0.14308      | 0.3011       |
| 16                             | 22     | 1       | 0.19811  | 0.03871 | 0.13508      | 0.2906       |
| 17                             | 21     | 2       | 0.17925  | 0.03725 | 0.11927      | 0.2694       |
| 18                             | 19     | 2       | 0.16038  | 0.03564 | 0.10375      | 0.2479       |
| 20                             | 17     | 2       | 0.14151  | 0.03385 | 0.08854      | 0.2262       |
| 21                             | 15     | 2       | 0.12264  | 0.03186 | 0.07371      | 0.2041       |
| 22                             | 13     | 2       | 0.10377  | 0.02962 | 0.05931      | 0.1816       |
| 23                             | 11     | 2       | 0.08491  | 0.02707 | 0.04545      | 0.1586       |
| 24                             | 9      | 1       | 0.07547  | 0.02566 | 0.03876      | 0.1469       |
| 25                             | 8      | 1       | 0.06604  | 0.02412 | 0.03228      | 0.1351       |
| 26                             | 7      | 3       | 0.03774  | 0.01851 | 0.01443      | 0.0987       |
| 29                             | 4      | 2       | 0.01887  | 0.01322 | 0.00478      | 0.0745       |
| 31                             | 2      | 1       | 0.00943  | 0.00939 | 0.00134      | 0.0664       |
| 32                             | 1      | 1       | 0        | NaN     | NA           | NA           |

**Table S75.** Gediz station Kaplan-Meier survival estimates according to SPI-6

| Kaplan-Meier Wet to Dry (SPI6) |        |         |          |         |              |              |
|--------------------------------|--------|---------|----------|---------|--------------|--------------|
|                                |        | n       | events   | median  | 0.95LCL      | 0.95UCL      |
|                                |        | 95      | 95       | 10      | 8            | 12           |
| time                           | n.risk | n.event | survival | std.err | lower 95% CL | upper 95% CL |
| 1                              | 95     | 1       | 0.9895   | 0.0105  | 0.96916      | 1            |
| 2                              | 94     | 6       | 0.9263   | 0.0268  | 0.87524      | 0.9804       |
| 3                              | 88     | 4       | 0.8842   | 0.0328  | 0.82215      | 0.951        |
| 4                              | 84     | 4       | 0.8421   | 0.0374  | 0.77188      | 0.9187       |
| 5                              | 80     | 4       | 0.8      | 0.041   | 0.72348      | 0.8846       |

|    |    |   |        |        |         |        |
|----|----|---|--------|--------|---------|--------|
| 6  | 76 | 5 | 0.7474 | 0.0446 | 0.66491 | 0.8401 |
| 7  | 71 | 8 | 0.6632 | 0.0485 | 0.57461 | 0.7653 |
| 8  | 63 | 8 | 0.5789 | 0.0507 | 0.48771 | 0.6873 |
| 9  | 55 | 6 | 0.5158 | 0.0513 | 0.42448 | 0.6267 |
| 10 | 49 | 5 | 0.4632 | 0.0512 | 0.373   | 0.5751 |
| 11 | 44 | 4 | 0.4211 | 0.0507 | 0.33261 | 0.533  |
| 12 | 40 | 4 | 0.3789 | 0.0498 | 0.29294 | 0.4902 |
| 13 | 36 | 3 | 0.3474 | 0.0489 | 0.26369 | 0.4576 |
| 14 | 33 | 4 | 0.3053 | 0.0472 | 0.22539 | 0.4134 |
| 15 | 29 | 2 | 0.2842 | 0.0463 | 0.20656 | 0.3911 |
| 16 | 27 | 3 | 0.2526 | 0.0446 | 0.17876 | 0.357  |
| 17 | 24 | 2 | 0.2316 | 0.0433 | 0.16055 | 0.334  |
| 18 | 22 | 4 | 0.1895 | 0.0402 | 0.125   | 0.2872 |
| 19 | 18 | 2 | 0.1684 | 0.0384 | 0.10773 | 0.2633 |
| 20 | 16 | 1 | 0.1579 | 0.0374 | 0.09924 | 0.2512 |
| 21 | 15 | 1 | 0.1474 | 0.0364 | 0.09085 | 0.239  |
| 22 | 14 | 1 | 0.1368 | 0.0353 | 0.08258 | 0.2268 |
| 23 | 13 | 2 | 0.1158 | 0.0328 | 0.06643 | 0.2018 |
| 24 | 11 | 2 | 0.0947 | 0.03   | 0.05088 | 0.1764 |
| 25 | 9  | 1 | 0.0842 | 0.0285 | 0.04339 | 0.1634 |
| 30 | 8  | 1 | 0.0737 | 0.0268 | 0.03612 | 0.1503 |
| 32 | 7  | 1 | 0.0632 | 0.025  | 0.02911 | 0.137  |
| 33 | 6  | 1 | 0.0526 | 0.0229 | 0.02242 | 0.1235 |
| 39 | 5  | 1 | 0.0421 | 0.0206 | 0.01614 | 0.1099 |
| 43 | 4  | 1 | 0.0316 | 0.0179 | 0.01037 | 0.0962 |
| 55 | 3  | 1 | 0.0211 | 0.0147 | 0.00534 | 0.083  |
| 80 | 2  | 1 | 0.0105 | 0.0105 | 0.0015  | 0.074  |
| 89 | 1  | 1 | 0      | NaN    | NA      | NA     |

**Table S76.** Gediz station Kaplan-Meier survival estimates according to SPI-12

| Kaplan-Meier Wet to Dry (SPI12) |        |         |          |         |              |              |
|---------------------------------|--------|---------|----------|---------|--------------|--------------|
|                                 |        | n       | events   | median  | 0.95LCL      | 0.95UCL      |
|                                 |        | 94      | 94       | 16      | 13           | 19           |
| time                            | n.risk | n.event | survival | std.err | lower 95% CL | upper 95% CL |
| 0                               | 94     | 1       | 0.9894   | 0.0106  | 0.96884      | 1            |
| 1                               | 93     | 5       | 0.9362   | 0.0252  | 0.88804      | 0.9869       |
| 2                               | 88     | 6       | 0.8723   | 0.0344  | 0.80742      | 0.9425       |
| 3                               | 82     | 5       | 0.8191   | 0.0397  | 0.74492      | 0.9008       |
| 4                               | 77     | 2       | 0.7979   | 0.0414  | 0.72068      | 0.8833       |
| 5                               | 75     | 3       | 0.766    | 0.0437  | 0.68497      | 0.8565       |
| 6                               | 72     | 2       | 0.7447   | 0.045   | 0.66155      | 0.8383       |
| 7                               | 70     | 2       | 0.7234   | 0.0461  | 0.6384       | 0.8197       |
| 8                               | 68     | 2       | 0.7021   | 0.0472  | 0.61551      | 0.8009       |

|     |    |   |        |        |         |        |
|-----|----|---|--------|--------|---------|--------|
| 9   | 66 | 3 | 0.6702 | 0.0485 | 0.5816  | 0.7723 |
| 10  | 63 | 3 | 0.6383 | 0.0496 | 0.54819 | 0.7432 |
| 11  | 60 | 1 | 0.6277 | 0.0499 | 0.53716 | 0.7334 |
| 12  | 59 | 2 | 0.6064 | 0.0504 | 0.51524 | 0.7136 |
| 13  | 57 | 3 | 0.5745 | 0.051  | 0.48273 | 0.6836 |
| 14  | 54 | 3 | 0.5426 | 0.0514 | 0.45064 | 0.6532 |
| 15  | 51 | 3 | 0.5106 | 0.0516 | 0.41895 | 0.6224 |
| 16  | 48 | 3 | 0.4787 | 0.0515 | 0.38768 | 0.5912 |
| 17  | 45 | 3 | 0.4468 | 0.0513 | 0.35681 | 0.5595 |
| 18  | 42 | 3 | 0.4149 | 0.0508 | 0.32634 | 0.5275 |
| 19  | 39 | 3 | 0.383  | 0.0501 | 0.2963  | 0.495  |
| 20  | 36 | 2 | 0.3617 | 0.0496 | 0.27652 | 0.4731 |
| 21  | 34 | 2 | 0.3404 | 0.0489 | 0.25693 | 0.4511 |
| 22  | 32 | 3 | 0.3085 | 0.0476 | 0.22795 | 0.4176 |
| 23  | 29 | 3 | 0.2766 | 0.0461 | 0.19946 | 0.3836 |
| 24  | 26 | 3 | 0.2447 | 0.0443 | 0.17153 | 0.349  |
| 25  | 23 | 2 | 0.2234 | 0.043  | 0.15325 | 0.3257 |
| 26  | 21 | 2 | 0.2021 | 0.0414 | 0.13527 | 0.302  |
| 27  | 19 | 2 | 0.1809 | 0.0397 | 0.11762 | 0.2781 |
| 28  | 17 | 1 | 0.1702 | 0.0388 | 0.10893 | 0.266  |
| 29  | 16 | 1 | 0.1596 | 0.0378 | 0.10034 | 0.2538 |
| 30  | 15 | 1 | 0.1489 | 0.0367 | 0.09186 | 0.2415 |
| 31  | 14 | 1 | 0.1383 | 0.0356 | 0.0835  | 0.2291 |
| 32  | 13 | 1 | 0.1277 | 0.0344 | 0.07526 | 0.2165 |
| 35  | 12 | 1 | 0.117  | 0.0332 | 0.06716 | 0.2039 |
| 56  | 11 | 1 | 0.1064 | 0.0318 | 0.05921 | 0.1911 |
| 87  | 10 | 1 | 0.0957 | 0.0303 | 0.05144 | 0.1782 |
| 88  | 9  | 1 | 0.0851 | 0.0288 | 0.04386 | 0.1651 |
| 89  | 8  | 1 | 0.0745 | 0.0271 | 0.03651 | 0.1519 |
| 90  | 7  | 1 | 0.0638 | 0.0252 | 0.02943 | 0.1384 |
| 91  | 6  | 1 | 0.0532 | 0.0231 | 0.02267 | 0.1248 |
| 92  | 5  | 1 | 0.0426 | 0.0208 | 0.01631 | 0.111  |
| 93  | 4  | 1 | 0.0319 | 0.0181 | 0.01048 | 0.0972 |
| 94  | 3  | 1 | 0.0213 | 0.0149 | 0.0054  | 0.0838 |
| 301 | 2  | 1 | 0.0106 | 0.0106 | 0.00151 | 0.0747 |
| 302 | 1  | 1 | 0      | NaN    | NA      | NA     |

**Table S77.** Gediz station Kaplan-Meier drought risk estimates according to SPI-3, 6, and 12

| Drought Risk (SPI3) |              | Drought Risk (SPI6) |              | Drought Risk (SPI12) |              |
|---------------------|--------------|---------------------|--------------|----------------------|--------------|
| Time                | Drought Risk | Time                | Drought Risk | Time                 | Drought Risk |
| 1                   | 0.0566       | 1                   | 0.0105       | 0                    | 0.0106       |
| 2                   | 0.10377      | 2                   | 0.0737       | 1                    | 0.0638       |
| 3                   | 0.16038      | 3                   | 0.1158       | 2                    | 0.1277       |



|    |         |    |        |     |        |
|----|---------|----|--------|-----|--------|
| 4  | 0.26415 | 4  | 0.1579 | 3   | 0.1809 |
| 5  | 0.36792 | 5  | 0.2    | 4   | 0.2021 |
| 6  | 0.46226 | 6  | 0.2526 | 5   | 0.234  |
| 7  | 0.50943 | 7  | 0.3368 | 6   | 0.2553 |
| 8  | 0.57547 | 8  | 0.4211 | 7   | 0.2766 |
| 9  | 0.65094 | 9  | 0.4842 | 8   | 0.2979 |
| 10 | 0.71698 | 10 | 0.5368 | 9   | 0.3298 |
| 11 | 0.76415 | 11 | 0.5789 | 10  | 0.3617 |
| 12 | 0.73666 | 12 | 0.6211 | 11  | 0.3723 |
| 13 | 0.79245 | 13 | 0.6526 | 12  | 0.3936 |
| 16 | 0.80189 | 14 | 0.6947 | 13  | 0.4255 |
| 17 | 0.82075 | 15 | 0.7158 | 14  | 0.4574 |
| 18 | 0.83962 | 16 | 0.7474 | 15  | 0.4894 |
| 20 | 0.85849 | 17 | 0.7684 | 16  | 0.5213 |
| 21 | 0.87736 | 18 | 0.8105 | 17  | 0.5532 |
| 22 | 0.89623 | 19 | 0.8316 | 18  | 0.5851 |
| 23 | 0.91509 | 20 | 0.8421 | 19  | 0.617  |
| 24 | 0.92453 | 21 | 0.8526 | 20  | 0.6383 |
| 25 | 0.93396 | 22 | 0.8632 | 21  | 0.6596 |
| 26 | 0.96226 | 23 | 0.8842 | 22  | 0.6915 |
| 29 | 0.98113 | 24 | 0.9053 | 23  | 0.7234 |
| 31 | 0.99057 | 25 | 0.9158 | 24  | 0.7553 |
| 32 | 1       | 30 | 0.9263 | 25  | 0.7766 |
|    |         | 32 | 0.9368 | 26  | 0.7979 |
|    |         | 33 | 0.9474 | 27  | 0.8191 |
|    |         | 39 | 0.9579 | 28  | 0.8298 |
|    |         | 43 | 0.9684 | 29  | 0.8404 |
|    |         | 55 | 0.9789 | 30  | 0.8511 |
|    |         | 80 | 0.9895 | 31  | 0.8617 |
|    |         | 89 | 1      | 32  | 0.8723 |
|    |         |    |        | 35  | 0.883  |
|    |         |    |        | 56  | 0.8936 |
|    |         |    |        | 87  | 0.9043 |
|    |         |    |        | 88  | 0.9149 |
|    |         |    |        | 89  | 0.9255 |
|    |         |    |        | 90  | 0.9362 |
|    |         |    |        | 91  | 0.9468 |
|    |         |    |        | 92  | 0.9574 |
|    |         |    |        | 93  | 0.9681 |
|    |         |    |        | 94  | 0.9787 |
|    |         |    |        | 301 | 0.9894 |
|    |         |    |        | 302 | 1      |

**Table S78.** Gediz station Kaplan-Meier survival estimates according to SPEI-3

| Kaplan-Meier Wet to Dry (SPEI3) |        |         |          |         |              |              |
|---------------------------------|--------|---------|----------|---------|--------------|--------------|
|                                 |        | n       | events   | median  | 0.95LCL      | 0.95UCL      |
|                                 |        | 115     | 115      | 9       | 9            | 10           |
| time                            | n.risk | n.event | survival | std.err | lower 95% CI | upper 95% CI |
| 1                               | 115    | 3       | 0.9739   | 0.01486 | 0.94521      | 10.000       |
| 2                               | 112    | 4       | 0.9391   | 0.0223  | 0.89643      | 0.9839       |
| 3                               | 108    | 2       | 0.9217   | 0.02505 | 0.87394      | 0.9722       |
| 4                               | 106    | 2       | 0.9043   | 0.02743 | 0.85216      | 0.9597       |
| 5                               | 104    | 4       | 0.8696   | 0.03141 | 0.81014      | 0.9333       |
| 6                               | 100    | 5       | 0.8261   | 0.03535 | 0.75964      | 0.8983       |
| 7                               | 95     | 10      | 0.7391   | 0.04095 | 0.66308      | 0.8239       |
| 8                               | 85     | 14      | 0.6174   | 0.04532 | 0.53466      | 0.7129       |
| 9                               | 71     | 15      | 0.487    | 0.04661 | 0.40366      | 0.5874       |
| 10                              | 56     | 12      | 0.3826   | 0.04532 | 0.30334      | 0.4826       |
| 11                              | 44     | 12      | 0.2783   | 0.04179 | 0.20731      | 0.3735       |
| 12                              | 32     | 6       | 0.2261   | 0.03901 | 0.16122      | 0.3171       |
| 13                              | 26     | 2       | 0.2087   | 0.03789 | 0.1462       | 0.2979       |
| 14                              | 24     | 3       | 0.1826   | 0.03603 | 0.12405      | 0.2688       |
| 15                              | 21     | 4       | 0.1478   | 0.0331  | 0.09532      | 0.2293       |
| 16                              | 17     | 3       | 0.1217   | 0.03049 | 0.07451      | 0.1989       |
| 17                              | 14     | 2       | 0.1043   | 0.02851 | 0.06109      | 0.1783       |
| 20                              | 12     | 1       | 0.0957   | 0.02743 | 0.05453      | 0.1678       |
| 21                              | 11     | 2       | 0.0783   | 0.02505 | 0.0418       | 0.1465       |
| 22                              | 9      | 1       | 0.0696   | 0.02372 | 0.03565      | 0.1357       |
| 23                              | 8      | 1       | 0.0609   | 0.0223  | 0.02969      | 0.1248       |
| 24                              | 7      | 1       | 0.0522   | 0.02074 | 0.02394      | 0.1137       |
| 25                              | 6      | 1       | 0.0435   | 0.01902 | 0.01845      | 0.1025       |
| 32                              | 5      | 1       | 0.0348   | 0.01709 | 0.01328      | 0.0911       |
| 36                              | 4      | 1       | 0.0261   | 0.01486 | 0.00854      | 0.0797       |
| 37                              | 3      | 1       | 0.0174   | 0.01219 | 0.0044       | 0.0687       |
| 42                              | 2      | 1       | 0.0087   | 0.00866 | 0.00124      | 0.0612       |
| 67                              | 1      | 1       | 0        | NaN     | NA           | NA           |

**Table S79.** Gediz station Kaplan-Meier survival estimates according to SPEI-6

| Kaplan-Meier Wet to Dry (SPEI6) |  |   |        |        |         |         |
|---------------------------------|--|---|--------|--------|---------|---------|
|                                 |  | n | events | median | 0.95LCL | 0.95UCL |

|      |        | 104     | 104      | 10.5    | 9            | 12           |
|------|--------|---------|----------|---------|--------------|--------------|
| time | n.risk | n.event | survival | std.err | lower 95% CI | upper 95% CI |
| 1    | 104    | 1       | 0.99038  | 0.00957 | 0.97181      | 10.000       |
| 2    | 103    | 2       | 0.97115  | 0.01641 | 0.93951      | 10.000       |
| 3    | 101    | 3       | 0.94231  | 0.02286 | 0.89855      | 0.9882       |
| 4    | 98     | 2       | 0.92308  | 0.02613 | 0.87326      | 0.9757       |
| 5    | 96     | 4       | 0.88462  | 0.03133 | 0.8253       | 0.9482       |
| 6    | 92     | 5       | 0.83654  | 0.03626 | 0.7684       | 0.9107       |
| 7    | 87     | 10      | 0.74038  | 0.04299 | 0.66074      | 0.8296       |
| 8    | 77     | 9       | 0.65385  | 0.04665 | 0.56852      | 0.752        |
| 9    | 68     | 8       | 0.57692  | 0.04845 | 0.48937      | 0.6801       |
| 10   | 60     | 8       | 0.5      | 0.04903 | 0.41257      | 0.606        |
| 11   | 52     | 10      | 0.40385  | 0.04811 | 0.31975      | 0.5101       |
| 12   | 42     | 6       | 0.34615  | 0.04665 | 0.2658       | 0.4508       |
| 13   | 36     | 3       | 0.31731  | 0.04564 | 0.23936      | 0.4206       |
| 14   | 33     | 1       | 0.30769  | 0.04526 | 0.23063      | 0.4105       |
| 15   | 32     | 1       | 0.29808  | 0.04485 | 0.22194      | 0.4003       |
| 16   | 31     | 2       | 0.27885  | 0.04397 | 0.20471      | 0.3798       |
| 17   | 29     | 1       | 0.26923  | 0.04349 | 0.19616      | 0.3695       |
| 18   | 28     | 2       | 0.25     | 0.04246 | 0.17921      | 0.3487       |
| 19   | 26     | 3       | 0.22115  | 0.0407  | 0.15419      | 0.3172       |
| 20   | 23     | 2       | 0.20192  | 0.03936 | 0.1378       | 0.2959       |
| 21   | 21     | 2       | 0.18269  | 0.03789 | 0.12167      | 0.2743       |
| 22   | 19     | 3       | 0.15385  | 0.03538 | 0.09803      | 0.2415       |
| 23   | 16     | 1       | 0.14423  | 0.03445 | 0.09031      | 0.2303       |
| 24   | 15     | 2       | 0.125    | 0.03243 | 0.07518      | 0.2078       |
| 25   | 13     | 1       | 0.11538  | 0.03133 | 0.06777      | 0.1965       |
| 36   | 12     | 1       | 0.10577  | 0.03016 | 0.06049      | 0.185        |
| 37   | 11     | 1       | 0.09615  | 0.02891 | 0.05334      | 0.1733       |
| 38   | 10     | 1       | 0.08654  | 0.02757 | 0.04635      | 0.1616       |
| 39   | 9      | 1       | 0.07692  | 0.02613 | 0.03953      | 0.1497       |
| 40   | 8      | 1       | 0.06731  | 0.02457 | 0.03291      | 0.1376       |
| 44   | 7      | 1       | 0.05769  | 0.02286 | 0.02653      | 0.1254       |
| 45   | 6      | 1       | 0.04808  | 0.02098 | 0.02044      | 0.1131       |
| 46   | 5      | 1       | 0.03846  | 0.01886 | 0.01471      | 0.1005       |
| 47   | 4      | 1       | 0.02885  | 0.01641 | 0.00946      | 0.088        |
| 48   | 3      | 1       | 0.01923  | 0.01347 | 0.00487      | 0.0759       |
| 118  | 2      | 1       | 0.00962  | 0.00957 | 0.00137      | 0.0676       |
| 119  | 1      | 1       | 0        | NaN     | NA           | NA           |

**Table S80.** Gediz station Kaplan-Meier survival estimates according to SPEI-12

| Kaplan-Meier Wet to Dry (SPEI12) |  |   |        |        |         |         |
|----------------------------------|--|---|--------|--------|---------|---------|
|                                  |  | n | events | median | 0.95LCL | 0.95UCL |

|      |        | 103     | 103      | 12      | 8            | 18           |
|------|--------|---------|----------|---------|--------------|--------------|
| time | n.risk | n.event | survival | std.err | lower 95% CI | upper 95% CI |
| 0    | 103    | 1       | 0.99029  | 0.00966 | 0.97153      | 10.000       |
| 1    | 102    | 8       | 0.91262  | 0.02782 | 0.85968      | 0.9688       |
| 2    | 94     | 7       | 0.84466  | 0.03569 | 0.77752      | 0.9176       |
| 3    | 87     | 8       | 0.76699  | 0.04165 | 0.68954      | 0.8531       |
| 4    | 79     | 7       | 0.69903  | 0.0452  | 0.61583      | 0.7935       |
| 5    | 72     | 3       | 0.6699   | 0.04633 | 0.58497      | 0.7672       |
| 6    | 69     | 3       | 0.64078  | 0.04727 | 0.55451      | 0.7405       |
| 7    | 66     | 3       | 0.61165  | 0.04802 | 0.52441      | 0.7134       |
| 8    | 63     | 3       | 0.58252  | 0.04859 | 0.49467      | 0.686        |
| 9    | 60     | 3       | 0.5534   | 0.04898 | 0.46526      | 0.6582       |
| 10   | 57     | 3       | 0.52427  | 0.04921 | 0.43618      | 0.6302       |
| 11   | 54     | 2       | 0.50485  | 0.04926 | 0.41697      | 0.6113       |
| 12   | 52     | 1       | 0.49515  | 0.04926 | 0.40742      | 0.6018       |
| 13   | 51     | 2       | 0.47573  | 0.04921 | 0.38843      | 0.5826       |
| 14   | 49     | 2       | 0.45631  | 0.04908 | 0.36958      | 0.5634       |
| 15   | 47     | 2       | 0.43689  | 0.04887 | 0.35088      | 0.544        |
| 16   | 45     | 2       | 0.41748  | 0.04859 | 0.33232      | 0.5245       |
| 17   | 43     | 2       | 0.39806  | 0.04823 | 0.31391      | 0.5048       |
| 18   | 41     | 1       | 0.38835  | 0.04802 | 0.30476      | 0.4949       |
| 19   | 40     | 1       | 0.37864  | 0.04779 | 0.29566      | 0.4849       |
| 20   | 39     | 1       | 0.36893  | 0.04754 | 0.28658      | 0.4749       |
| 21   | 38     | 3       | 0.33981  | 0.04667 | 0.25961      | 0.4448       |
| 22   | 35     | 3       | 0.31068  | 0.0456  | 0.23301      | 0.4142       |
| 23   | 32     | 2       | 0.29126  | 0.04477 | 0.2155       | 0.3937       |
| 24   | 30     | 3       | 0.26214  | 0.04333 | 0.18959      | 0.3624       |
| 25   | 27     | 3       | 0.23301  | 0.04165 | 0.16414      | 0.3308       |
| 26   | 24     | 2       | 0.21359  | 0.04038 | 0.14745      | 0.3094       |
| 27   | 22     | 2       | 0.19417  | 0.03898 | 0.13102      | 0.2878       |
| 28   | 20     | 2       | 0.17476  | 0.03742 | 0.11486      | 0.2659       |
| 29   | 18     | 1       | 0.16505  | 0.03658 | 0.1069       | 0.2548       |
| 30   | 17     | 1       | 0.15534  | 0.03569 | 0.09902      | 0.2437       |
| 31   | 16     | 2       | 0.13592  | 0.03377 | 0.08353      | 0.2212       |
| 32   | 14     | 2       | 0.1165   | 0.03161 | 0.06845      | 0.1983       |
| 33   | 12     | 1       | 0.1068   | 0.03043 | 0.06109      | 0.1867       |
| 35   | 11     | 1       | 0.09709  | 0.02917 | 0.05388      | 0.175        |
| 81   | 10     | 1       | 0.08738  | 0.02782 | 0.04681      | 0.1631       |
| 82   | 9      | 1       | 0.07767  | 0.02637 | 0.03992      | 0.1511       |
| 83   | 8      | 1       | 0.06796  | 0.0248  | 0.03324      | 0.139        |
| 84   | 7      | 1       | 0.05825  | 0.02308 | 0.0268       | 0.1266       |
| 85   | 6      | 1       | 0.04854  | 0.02118 | 0.02065      | 0.1141       |
| 86   | 5      | 1       | 0.03883  | 0.01904 | 0.01486      | 0.1015       |
| 87   | 4      | 1       | 0.02913  | 0.01657 | 0.00955      | 0.0888       |

|     |   |   |         |         |         |        |
|-----|---|---|---------|---------|---------|--------|
| 88  | 3 | 1 | 0.01942 | 0.0136  | 0.00492 | 0.0766 |
| 133 | 2 | 1 | 0.00971 | 0.00966 | 0.00138 | 0.0683 |
| 187 | 1 | 1 | 0       | NaN     | NA      | NA     |

**Table S81.** Gediz station Kaplan-Meier drought risk estimates according to SPEI-3, 6, and 12

| Drought Risk (SPEI3) |              | Drought Risk (SPEI6) |              | Drought Risk (SPEI12) |              |
|----------------------|--------------|----------------------|--------------|-----------------------|--------------|
| Time                 | Drought Risk | Time                 | Drought Risk | Time                  | Drought Risk |
| 1                    | 0.0261       | 1                    | 0.00962      | 0                     | 0.00971      |
| 2                    | 0.0609       | 2                    | 0.02885      | 1                     | 0.08738      |
| 3                    | 0.0783       | 3                    | 0.05769      | 2                     | 0.15534      |
| 4                    | 0.0957       | 4                    | 0.07692      | 3                     | 0.23301      |
| 5                    | 0.1304       | 5                    | 0.11538      | 4                     | 0.30097      |
| 6                    | 0.1739       | 6                    | 0.16346      | 5                     | 0.3301       |
| 7                    | 0.2609       | 7                    | 0.25962      | 6                     | 0.35922      |
| 8                    | 0.3826       | 8                    | 0.34615      | 7                     | 0.38835      |
| 9                    | 0.513        | 9                    | 0.42308      | 8                     | 0.41748      |
| 10                   | 0.6174       | 10                   | 0.5          | 9                     | 0.4466       |
| 11                   | 0.7217       | 11                   | 0.59615      | 10                    | 0.47573      |
| 12                   | 0.7739       | 12                   | 0.65385      | 11                    | 0.49515      |
| 13                   | 0.7913       | 13                   | 0.68269      | 12                    | 0.50485      |
| 14                   | 0.8174       | 14                   | 0.69231      | 13                    | 0.52427      |
| 15                   | 0.8522       | 15                   | 0.70192      | 14                    | 0.54369      |
| 16                   | 0.8783       | 16                   | 0.72115      | 15                    | 0.56311      |
| 17                   | 0.8957       | 17                   | 0.73077      | 16                    | 0.58252      |
| 20                   | 0.9043       | 18                   | 0.75         | 17                    | 0.60194      |
| 21                   | 0.9217       | 19                   | 0.77885      | 18                    | 0.61165      |
| 22                   | 0.9304       | 20                   | 0.79808      | 19                    | 0.62136      |
| 23                   | 0.9391       | 21                   | 0.81731      | 20                    | 0.63107      |
| 24                   | 0.9478       | 22                   | 0.84615      | 21                    | 0.66019      |
| 25                   | 0.9565       | 23                   | 0.85577      | 22                    | 0.68932      |
| 32                   | 0.9652       | 24                   | 0.875        | 23                    | 0.70874      |
| 36                   | 0.9739       | 25                   | 0.88462      | 24                    | 0.73786      |
| 37                   | 0.9826       | 36                   | 0.89423      | 25                    | 0.76699      |
| 42                   | 0.9913       | 37                   | 0.90385      | 26                    | 0.78641      |
| 67                   | 1            | 38                   | 0.91346      | 27                    | 0.80583      |
|                      |              | 39                   | 0.92308      | 28                    | 0.82524      |
|                      |              | 40                   | 0.93269      | 29                    | 0.83495      |
|                      |              | 44                   | 0.94231      | 30                    | 0.84466      |
|                      |              | 45                   | 0.95192      | 31                    | 0.86408      |
|                      |              | 46                   | 0.96154      | 32                    | 0.8835       |

|     |         |     |         |
|-----|---------|-----|---------|
| 47  | 0.97115 | 33  | 0.8932  |
| 48  | 0.98077 | 35  | 0.90291 |
| 118 | 0.99038 | 81  | 0.91262 |
| 119 | 1       | 82  | 0.92233 |
|     |         | 83  | 0.93204 |
|     |         | 84  | 0.94175 |
|     |         | 85  | 0.95146 |
|     |         | 86  | 0.96117 |
|     |         | 87  | 0.97087 |
|     |         | 88  | 0.98058 |
|     |         | 133 | 0.99029 |
|     |         | 187 | 1       |

**Table S82.** Golmarmara station Kaplan-Meier survival estimates according to SPI-3

| Kaplan-Meier Wet to Dry (SPI3) |        |         |          |         |              |              |
|--------------------------------|--------|---------|----------|---------|--------------|--------------|
|                                |        | n       | events   | median  | 0.95LCL      | 0.95UCL      |
|                                |        | 75      | 75       | 8       | 6            | 10           |
| time                           | n.risk | n.event | survival | std.err | lower 95% CL | upper 95% CL |
| 1                              | 75     | 5       | 0.9333   | 0.0288  | 0.87855      | 0.9915       |
| 2                              | 70     | 2       | 0.9067   | 0.0336  | 0.84316      | 0.975        |
| 3                              | 68     | 9       | 0.7867   | 0.0473  | 0.69921      | 0.8851       |
| 4                              | 59     | 7       | 0.6933   | 0.0532  | 0.59645      | 0.806        |
| 5                              | 52     | 2       | 0.6667   | 0.0544  | 0.56808      | 0.7824       |
| 6                              | 50     | 6       | 0.5867   | 0.0569  | 0.48517      | 0.7094       |
| 7                              | 44     | 6       | 0.5067   | 0.0577  | 0.40526      | 0.6334       |
| 8                              | 38     | 4       | 0.4533   | 0.0575  | 0.35358      | 0.5812       |
| 9                              | 34     | 4       | 0.4      | 0.0566  | 0.30317      | 0.5278       |
| 10                             | 30     | 4       | 0.3467   | 0.055   | 0.25409      | 0.473        |
| 11                             | 26     | 2       | 0.32     | 0.0539  | 0.23008      | 0.4451       |
| 12                             | 24     | 1       | 0.3067   | 0.0532  | 0.21821      | 0.431        |
| 13                             | 23     | 3       | 0.2667   | 0.0511  | 0.18322      | 0.3881       |
| 14                             | 20     | 2       | 0.24     | 0.0493  | 0.16044      | 0.359        |
| 15                             | 18     | 4       | 0.1867   | 0.045   | 0.11639      | 0.2994       |
| 16                             | 14     | 3       | 0.1467   | 0.0409  | 0.08497      | 0.2532       |
| 17                             | 11     | 1       | 0.1333   | 0.0393  | 0.07488      | 0.2374       |
| 18                             | 10     | 2       | 0.1067   | 0.0356  | 0.05541      | 0.2053       |
| 20                             | 8      | 1       | 0.0933   | 0.0336  | 0.0461       | 0.189        |
| 21                             | 7      | 2       | 0.0667   | 0.0288  | 0.02859      | 0.1555       |
| 25                             | 5      | 1       | 0.0533   | 0.0259  | 0.02055      | 0.1384       |
| 30                             | 4      | 1       | 0.04     | 0.0226  | 0.0132       | 0.1212       |
| 31                             | 3      | 1       | 0.0267   | 0.0186  | 0.00679      | 0.1047       |
| 37                             | 2      | 1       | 0.0133   | 0.0132  | 0.0019       | 0.0934       |
| 38                             | 1      | 1       | 0        | NaN     | NA           | NA           |

**Table S83.** Golmarmara station Kaplan-Meier survival estimates according to SPI-6

| Kaplan-Meier Wet to Dry (SPI6) |        |         |          |         |              |              |
|--------------------------------|--------|---------|----------|---------|--------------|--------------|
|                                |        | n       | events   | median  | 0.95LCL      | 0.95UCL      |
|                                |        | 70      | 70       | 9.5     | 8            | 12           |
| time                           | n.risk | n.event | survival | std.err | lower 95% CL | upper 95% CL |
| 1                              | 70     | 5       | 0.9286   | 0.0308  | 0.87016      | 0.991        |
| 2                              | 65     | 4       | 0.8714   | 0.04    | 0.79644      | 0.953        |
| 3                              | 61     | 4       | 0.8143   | 0.0465  | 0.7281       | 0.911        |
| 4                              | 57     | 3       | 0.7714   | 0.0502  | 0.67907      | 0.876        |
| 5                              | 54     | 3       | 0.7286   | 0.0532  | 0.6315       | 0.841        |
| 6                              | 51     | 4       | 0.6714   | 0.0561  | 0.56994      | 0.791        |
| 7                              | 47     | 4       | 0.6143   | 0.0582  | 0.51021      | 0.74         |
| 8                              | 43     | 5       | 0.5429   | 0.0595  | 0.43785      | 0.673        |
| 9                              | 38     | 3       | 0.5      | 0.0598  | 0.39558      | 0.632        |
| 10                             | 35     | 4       | 0.4429   | 0.0594  | 0.34053      | 0.576        |
| 11                             | 31     | 5       | 0.3714   | 0.0578  | 0.27386      | 0.504        |
| 12                             | 26     | 2       | 0.3429   | 0.0567  | 0.24789      | 0.474        |
| 13                             | 24     | 2       | 0.3143   | 0.0555  | 0.22236      | 0.444        |
| 14                             | 22     | 1       | 0.3      | 0.0548  | 0.20976      | 0.429        |
| 15                             | 21     | 1       | 0.2857   | 0.054   | 0.19727      | 0.414        |
| 16                             | 20     | 1       | 0.2714   | 0.0532  | 0.18492      | 0.398        |
| 17                             | 19     | 2       | 0.2429   | 0.0513  | 0.16059      | 0.367        |
| 18                             | 17     | 2       | 0.2143   | 0.049   | 0.13683      | 0.336        |
| 19                             | 15     | 2       | 0.1857   | 0.0465  | 0.11371      | 0.303        |
| 20                             | 13     | 2       | 0.1571   | 0.0435  | 0.09134      | 0.27         |
| 21                             | 11     | 1       | 0.1429   | 0.0418  | 0.08048      | 0.254        |
| 22                             | 10     | 2       | 0.1143   | 0.038   | 0.05953      | 0.219        |
| 23                             | 8      | 1       | 0.1      | 0.0359  | 0.04952      | 0.202        |
| 24                             | 7      | 1       | 0.0857   | 0.0335  | 0.03988      | 0.184        |
| 25                             | 6      | 1       | 0.0714   | 0.0308  | 0.03069      | 0.166        |
| 26                             | 5      | 1       | 0.0571   | 0.0277  | 0.02206      | 0.148        |
| 41                             | 4      | 1       | 0.0429   | 0.0242  | 0.01417      | 0.13         |
| 42                             | 3      | 1       | 0.0286   | 0.0199  | 0.00729      | 0.112        |
| 43                             | 2      | 1       | 0.0143   | 0.0142  | 0.00204      | 0.1          |
| 61                             | 1      | 1       | 0        | NaN     | NA           | NA           |

**Table S84.** Golmarmara station Kaplan-Meier survival estimates according to SPI-12

| Kaplan-Meier Wet to Dry (SPI12) |  |    |        |        |         |         |
|---------------------------------|--|----|--------|--------|---------|---------|
|                                 |  | n  | events | median | 0.95LCL | 0.95UCL |
|                                 |  | 59 | 59     | 15     | 12      | 20      |

| time | n.risk | n.event | survival | std.err | lower 95% CL | upper 95% CL |
|------|--------|---------|----------|---------|--------------|--------------|
| 0    | 59     | 1       | 0.9831   | 0.0168  | 0.95066      | 1            |
| 1    | 58     | 2       | 0.9492   | 0.0286  | 0.89472      | 1            |
| 2    | 56     | 3       | 0.8983   | 0.0393  | 0.8244       | 0.979        |
| 3    | 53     | 1       | 0.8814   | 0.0421  | 0.80259      | 0.968        |
| 4    | 52     | 2       | 0.8475   | 0.0468  | 0.76051      | 0.944        |
| 5    | 50     | 2       | 0.8136   | 0.0507  | 0.72001      | 0.919        |
| 6    | 48     | 1       | 0.7966   | 0.0524  | 0.70025      | 0.906        |
| 7    | 47     | 1       | 0.7797   | 0.054   | 0.68076      | 0.893        |
| 8    | 46     | 2       | 0.7458   | 0.0567  | 0.64254      | 0.866        |
| 9    | 44     | 3       | 0.6949   | 0.0599  | 0.58682      | 0.823        |
| 10   | 41     | 1       | 0.678    | 0.0608  | 0.56863      | 0.808        |
| 11   | 40     | 1       | 0.661    | 0.0616  | 0.55062      | 0.794        |
| 12   | 39     | 3       | 0.6102   | 0.0635  | 0.49759      | 0.748        |
| 13   | 36     | 3       | 0.5593   | 0.0646  | 0.44596      | 0.701        |
| 14   | 33     | 2       | 0.5254   | 0.065   | 0.41228      | 0.67         |
| 15   | 31     | 2       | 0.4915   | 0.0651  | 0.37917      | 0.637        |
| 16   | 29     | 2       | 0.4576   | 0.0649  | 0.34663      | 0.604        |
| 17   | 27     | 2       | 0.4237   | 0.0643  | 0.31467      | 0.571        |
| 18   | 25     | 2       | 0.3898   | 0.0635  | 0.28329      | 0.536        |
| 19   | 23     | 2       | 0.3559   | 0.0623  | 0.25252      | 0.502        |
| 20   | 21     | 1       | 0.339    | 0.0616  | 0.23737      | 0.484        |
| 21   | 20     | 1       | 0.322    | 0.0608  | 0.22239      | 0.466        |
| 22   | 19     | 1       | 0.3051   | 0.0599  | 0.20757      | 0.448        |
| 23   | 18     | 2       | 0.2712   | 0.0579  | 0.17848      | 0.412        |
| 24   | 16     | 2       | 0.2373   | 0.0554  | 0.15018      | 0.375        |
| 72   | 14     | 1       | 0.2203   | 0.054   | 0.13634      | 0.356        |
| 96   | 13     | 1       | 0.2034   | 0.0524  | 0.12275      | 0.337        |
| 97   | 12     | 1       | 0.1864   | 0.0507  | 0.10941      | 0.318        |
| 135  | 11     | 1       | 0.1695   | 0.0488  | 0.09635      | 0.298        |
| 136  | 10     | 1       | 0.1525   | 0.0468  | 0.0836       | 0.278        |
| 137  | 9      | 1       | 0.1356   | 0.0446  | 0.07119      | 0.258        |
| 138  | 8      | 1       | 0.1186   | 0.0421  | 0.05918      | 0.238        |
| 139  | 7      | 1       | 0.1017   | 0.0393  | 0.04764      | 0.217        |
| 140  | 6      | 1       | 0.0847   | 0.0363  | 0.03664      | 0.196        |
| 141  | 5      | 1       | 0.0678   | 0.0327  | 0.02632      | 0.175        |
| 142  | 4      | 1       | 0.0508   | 0.0286  | 0.01688      | 0.153        |
| 143  | 3      | 1       | 0.0339   | 0.0236  | 0.00868      | 0.132        |
| 144  | 2      | 1       | 0.0169   | 0.0168  | 0.00243      | 0.118        |
| 145  | 1      | 1       | 0        | NaN     | NA           | NA           |

**Table S85.** Golmarmara station Kaplan-Meier drought risk estimates according to SPI-3, 6, and 12

|                     |                     |                      |
|---------------------|---------------------|----------------------|
| Drought Risk (SPI3) | Drought Risk (SPI6) | Drought Risk (SPI12) |
|---------------------|---------------------|----------------------|



| Time | Drought Risk | Time | Drought Risk | Time | Drought Risk |
|------|--------------|------|--------------|------|--------------|
| 1    | 0.0667       | 1    | 0.0714       | 0    | 0.0169       |
| 2    | 0.0933       | 2    | 0.1286       | 1    | 0.0508       |
| 3    | 0.2133       | 3    | 0.1857       | 2    | 0.1017       |
| 4    | 0.3067       | 4    | 0.2286       | 3    | 0.1186       |
| 5    | 0.3333       | 5    | 0.2714       | 4    | 0.1525       |
| 6    | 0.4133       | 6    | 0.3286       | 5    | 0.1864       |
| 7    | 0.4933       | 7    | 0.3857       | 6    | 0.2034       |
| 8    | 0.5467       | 8    | 0.4571       | 7    | 0.2203       |
| 9    | 0.6          | 9    | 0.5          | 8    | 0.2542       |
| 10   | 0.6533       | 10   | 0.5571       | 9    | 0.3051       |
| 11   | 0.68         | 11   | 0.6286       | 10   | 0.322        |
| 12   | 0.6933       | 12   | 0.6571       | 11   | 0.339        |
| 13   | 0.7333       | 13   | 0.6857       | 12   | 0.3898       |
| 14   | 0.76         | 14   | 0.7          | 13   | 0.4407       |
| 15   | 0.8133       | 15   | 0.7143       | 14   | 0.4746       |
| 16   | 0.8533       | 16   | 0.7286       | 15   | 0.5085       |
| 17   | 0.8667       | 17   | 0.7571       | 16   | 0.5424       |
| 18   | 0.8933       | 18   | 0.7857       | 17   | 0.5763       |
| 20   | 0.9067       | 19   | 0.8143       | 18   | 0.6102       |
| 21   | 0.9333       | 20   | 0.8429       | 19   | 0.6441       |
| 25   | 0.9467       | 21   | 0.8571       | 20   | 0.661        |
| 30   | 0.96         | 22   | 0.8857       | 21   | 0.678        |
| 31   | 0.9733       | 23   | 0.9          | 22   | 0.6949       |
| 37   | 0.9867       | 24   | 0.9143       | 23   | 0.7288       |
| 38   | 1            | 25   | 0.9286       | 24   | 0.7627       |
|      |              | 26   | 0.9429       | 72   | 0.7797       |
|      |              | 41   | 0.9571       | 96   | 0.7966       |
|      |              | 42   | 0.9714       | 97   | 0.8136       |
|      |              | 43   | 0.9857       | 135  | 0.8305       |
|      |              | 61   | 1            | 136  | 0.8475       |
|      |              |      |              | 137  | 0.8644       |
|      |              |      |              | 138  | 0.8814       |
|      |              |      |              | 139  | 0.8983       |
|      |              |      |              | 140  | 0.9153       |
|      |              |      |              | 141  | 0.9322       |
|      |              |      |              | 142  | 0.9492       |
|      |              |      |              | 143  | 0.9661       |
|      |              |      |              | 144  | 0.9831       |
|      |              |      |              | 145  | 1            |

**Table S86.** Golmarmara station Kaplan-Meier survival estimates according to SPEI-3

| Kaplan-Meier Wet to Dry (SPEI3) |  |   |        |        |         |         |
|---------------------------------|--|---|--------|--------|---------|---------|
|                                 |  | n | events | median | 0.95LCL | 0.95UCL |

|      |        | 56      | 56       | 6       | 4            | 7            |
|------|--------|---------|----------|---------|--------------|--------------|
| time | n.risk | n.event | survival | std.err | lower 95% CI | upper 95% CI |
| 1    | 56     | 3       | 0.9464   | 0.0301  | 0.88925      | 1.000        |
| 2    | 53     | 3       | 0.8929   | 0.0413  | 0.81542      | 0.978        |
| 3    | 50     | 6       | 0.7857   | 0.0548  | 0.68527      | 0.901        |
| 4    | 44     | 10      | 0.6071   | 0.0653  | 0.49181      | 0.75         |
| 5    | 34     | 5       | 0.5179   | 0.0668  | 0.40221      | 0.667        |
| 6    | 29     | 5       | 0.4286   | 0.0661  | 0.31672      | 0.58         |
| 7    | 24     | 5       | 0.3393   | 0.0633  | 0.23542      | 0.489        |
| 8    | 19     | 4       | 0.2679   | 0.0592  | 0.17372      | 0.413        |
| 9    | 15     | 1       | 0.25     | 0.0579  | 0.15883      | 0.394        |
| 10   | 14     | 1       | 0.2321   | 0.0564  | 0.14417      | 0.374        |
| 11   | 13     | 2       | 0.1964   | 0.0531  | 0.11565      | 0.334        |
| 13   | 11     | 1       | 0.1786   | 0.0512  | 0.10182      | 0.313        |
| 14   | 10     | 1       | 0.1607   | 0.0491  | 0.08833      | 0.292        |
| 15   | 9      | 2       | 0.125    | 0.0442  | 0.06251      | 0.25         |
| 16   | 7      | 1       | 0.1071   | 0.0413  | 0.0503       | 0.228        |
| 30   | 6      | 2       | 0.0714   | 0.0344  | 0.02778      | 0.184        |
| 31   | 4      | 1       | 0.0536   | 0.0301  | 0.01782      | 0.161        |
| 43   | 3      | 1       | 0.0357   | 0.0248  | 0.00916      | 0.139        |
| 47   | 2      | 1       | 0.0179   | 0.0177  | 0.00256      | 0.125        |
| 48   | 1      | 1       | 0        | NaN     | NA           | NA           |

**Table S87.** Golmarmara station Kaplan-Meier survival estimates according to SPEI-6

| Kaplan-Meier Wet to Dry (SPEI6) |        |         |          |         |              |              |
|---------------------------------|--------|---------|----------|---------|--------------|--------------|
|                                 |        | n       | events   | median  | 0.95LCL      | 0.95UCL      |
|                                 |        | 67      | 67       | 8       | 7            | 15           |
| time                            | n.risk | n.event | survival | std.err | lower 95% CI | upper 95% CI |
| 1                               | 67     | 4       | 0.9403   | 0.0289  | 0.88524      | 0.999        |
| 2                               | 63     | 6       | 0.8507   | 0.0435  | 0.76956      | 0.94         |
| 3                               | 57     | 5       | 0.7761   | 0.0509  | 0.68246      | 0.883        |
| 4                               | 52     | 4       | 0.7164   | 0.0551  | 0.61623      | 0.833        |
| 5                               | 48     | 3       | 0.6716   | 0.0574  | 0.5681       | 0.794        |
| 6                               | 45     | 4       | 0.6119   | 0.0595  | 0.50571      | 0.74         |
| 7                               | 41     | 5       | 0.5373   | 0.0609  | 0.43026      | 0.671        |
| 8                               | 36     | 3       | 0.4925   | 0.0611  | 0.38626      | 0.628        |
| 9                               | 33     | 2       | 0.4627   | 0.0609  | 0.35746      | 0.599        |
| 10                              | 31     | 2       | 0.4328   | 0.0605  | 0.32907      | 0.569        |
| 11                              | 29     | 1       | 0.4179   | 0.0603  | 0.31503      | 0.554        |
| 12                              | 28     | 1       | 0.403    | 0.0599  | 0.3011       | 0.539        |
| 13                              | 27     | 1       | 0.3881   | 0.0595  | 0.28728      | 0.524        |
| 14                              | 26     | 1       | 0.3731   | 0.0591  | 0.27358      | 0.509        |

|    |    |   |        |        |         |       |
|----|----|---|--------|--------|---------|-------|
| 15 | 25 | 1 | 0.3582 | 0.0586 | 0.25998 | 0.494 |
| 16 | 24 | 1 | 0.3433 | 0.058  | 0.2465  | 0.478 |
| 17 | 23 | 2 | 0.3134 | 0.0567 | 0.21991 | 0.447 |
| 18 | 21 | 4 | 0.2537 | 0.0532 | 0.16828 | 0.383 |
| 19 | 17 | 3 | 0.209  | 0.0497 | 0.13114 | 0.333 |
| 20 | 14 | 1 | 0.194  | 0.0483 | 0.1191  | 0.316 |
| 21 | 13 | 1 | 0.1791 | 0.0468 | 0.10727 | 0.299 |
| 22 | 12 | 1 | 0.1642 | 0.0453 | 0.09565 | 0.282 |
| 23 | 11 | 1 | 0.1493 | 0.0435 | 0.08427 | 0.264 |
| 24 | 10 | 1 | 0.1343 | 0.0417 | 0.07314 | 0.247 |
| 27 | 9  | 1 | 0.1194 | 0.0396 | 0.06232 | 0.229 |
| 28 | 8  | 1 | 0.1045 | 0.0374 | 0.05183 | 0.211 |
| 40 | 7  | 1 | 0.0896 | 0.0349 | 0.04173 | 0.192 |
| 41 | 6  | 1 | 0.0746 | 0.0321 | 0.03211 | 0.173 |
| 42 | 5  | 2 | 0.0448 | 0.0253 | 0.01482 | 0.135 |
| 43 | 3  | 2 | 0.0149 | 0.0148 | 0.00213 | 0.104 |
| 63 | 1  | 1 | 0      | NaN    | NA      | NA    |

**Table S88.** Golmarmara station Kaplan-Meier survival estimates according to SPEI-12

| Kaplan-Meier Wet to Dry (SPEI12) |        |         |          |         |              |              |
|----------------------------------|--------|---------|----------|---------|--------------|--------------|
|                                  |        | n       | events   | median  | 0.95LCL      | 0.95UCL      |
|                                  |        | 52      | 52       | 14.5    | 11           | 19           |
| time                             | n.risk | n.event | survival | std.err | lower 95% CI | upper 95% CI |
| 1                                | 52     | 3       | 0.9423   | 0.0323  | 0.88102      | 1.000        |
| 2                                | 49     | 3       | 0.8846   | 0.0443  | 0.80191      | 0.976        |
| 3                                | 46     | 2       | 0.8462   | 0.05    | 0.75356      | 0.95         |
| 4                                | 44     | 2       | 0.8077   | 0.0547  | 0.70737      | 0.922        |
| 7                                | 42     | 1       | 0.7885   | 0.0566  | 0.68492      | 0.908        |
| 8                                | 41     | 2       | 0.75     | 0.06    | 0.64108      | 0.877        |
| 9                                | 39     | 3       | 0.6923   | 0.064   | 0.57757      | 0.83         |
| 10                               | 36     | 2       | 0.6538   | 0.066   | 0.53652      | 0.797        |
| 11                               | 34     | 2       | 0.6154   | 0.0675  | 0.4964       | 0.763        |
| 12                               | 32     | 2       | 0.5769   | 0.0685  | 0.45712      | 0.728        |
| 13                               | 30     | 2       | 0.5385   | 0.0691  | 0.41867      | 0.693        |
| 14                               | 28     | 2       | 0.5      | 0.0693  | 0.381        | 0.656        |
| 15                               | 26     | 2       | 0.4615   | 0.0691  | 0.34412      | 0.619        |
| 16                               | 24     | 2       | 0.4231   | 0.0685  | 0.30802      | 0.581        |
| 17                               | 22     | 2       | 0.3846   | 0.0675  | 0.27272      | 0.542        |
| 18                               | 20     | 2       | 0.3462   | 0.066   | 0.23825      | 0.503        |
| 19                               | 18     | 2       | 0.3077   | 0.064   | 0.20467      | 0.463        |
| 21                               | 16     | 1       | 0.2885   | 0.0628  | 0.18823      | 0.442        |
| 22                               | 15     | 1       | 0.2692   | 0.0615  | 0.17205      | 0.421        |
| 64                               | 14     | 1       | 0.25     | 0.06    | 0.15613      | 0.4          |

|    |    |   |        |        |         |       |
|----|----|---|--------|--------|---------|-------|
| 65 | 13 | 1 | 0.2308 | 0.0584 | 0.1405  | 0.379 |
| 66 | 12 | 1 | 0.2115 | 0.0566 | 0.12517 | 0.358 |
| 67 | 11 | 1 | 0.1923 | 0.0547 | 0.11018 | 0.336 |
| 68 | 10 | 2 | 0.1538 | 0.05   | 0.08133 | 0.291 |
| 69 | 8  | 1 | 0.1346 | 0.0473 | 0.06758 | 0.268 |
| 70 | 7  | 1 | 0.1154 | 0.0443 | 0.05436 | 0.245 |
| 71 | 6  | 1 | 0.0962 | 0.0409 | 0.04179 | 0.221 |
| 72 | 5  | 1 | 0.0769 | 0.037  | 0.03    | 0.197 |
| 73 | 4  | 1 | 0.0577 | 0.0323 | 0.01923 | 0.173 |
| 74 | 3  | 1 | 0.0385 | 0.0267 | 0.00988 | 0.15  |
| 91 | 2  | 1 | 0.0192 | 0.019  | 0.00276 | 0.134 |
| 92 | 1  | 1 | 0      | NaN    | NA      | NA    |

**Table S89.** Golmarmara station Kaplan-Meier drought risk estimates according to SPEI-3, 6, and 12

| Drought Risk (SPEI3) |              | Drought Risk (SPEI6) |              | Drought Risk (SPEI12) |              |
|----------------------|--------------|----------------------|--------------|-----------------------|--------------|
| Time                 | Drought Risk | Time                 | Drought Risk | Time                  | Drought Risk |
| 1                    | 0.0536       | 1                    | 0.0597       | 1                     | 0.0577       |
| 2                    | 0.1071       | 2                    | 0.1493       | 2                     | 0.1154       |
| 3                    | 0.2143       | 3                    | 0.2239       | 3                     | 0.1538       |
| 4                    | 0.3929       | 4                    | 0.2836       | 4                     | 0.1923       |
| 5                    | 0.4821       | 5                    | 0.3284       | 6                     | 0.2051       |
| 6                    | 0.5714       | 6                    | 0.3881       | 7                     | 0.2115       |
| 7                    | 0.6607       | 7                    | 0.4627       | 8                     | 0.25         |
| 8                    | 0.7321       | 8                    | 0.5075       | 9                     | 0.3077       |
| 9                    | 0.75         | 9                    | 0.5373       | 10                    | 0.3462       |
| 10                   | 0.7679       | 10                   | 0.5672       | 11                    | 0.3846       |
| 11                   | 0.8036       | 11                   | 0.5821       | 12                    | 0.4231       |
| 12                   | 0.8125       | 12                   | 0.597        | 13                    | 0.4615       |
| 13                   | 0.8214       | 13                   | 0.6119       | 14                    | 0.5          |
| 14                   | 0.8393       | 14                   | 0.6269       | 15                    | 0.5385       |
| 15                   | 0.875        | 15                   | 0.6418       | 16                    | 0.5769       |
| 16                   | 0.8929       | 16                   | 0.6567       | 17                    | 0.6154       |
| 30                   | 0.9286       | 17                   | 0.6866       | 18                    | 0.6538       |
| 31                   | 0.9464       | 18                   | 0.7463       | 19                    | 0.6923       |
| 43                   | 0.9643       | 19                   | 0.791        | 21                    | 0.7115       |
| 47                   | 0.9821       | 20                   | 0.806        | 22                    | 0.7308       |
| 48                   | 1            | 21                   | 0.8209       | 64                    | 0.75         |
|                      |              | 22                   | 0.8358       | 65                    | 0.7692       |
|                      |              | 23                   | 0.8507       | 66                    | 0.7885       |
|                      |              | 24                   | 0.8657       | 67                    | 0.8077       |
|                      |              | 27                   | 0.8806       | 68                    | 0.8462       |
|                      |              | 28                   | 0.8955       | 69                    | 0.8654       |

|    |        |    |        |
|----|--------|----|--------|
| 40 | 0.9104 | 70 | 0.8846 |
| 41 | 0.9254 | 71 | 0.9038 |
| 42 | 0.9552 | 72 | 0.9231 |
| 43 | 0.9851 | 73 | 0.9423 |
| 63 | 1      | 74 | 0.9615 |
|    |        | 91 | 0.9808 |
|    |        | 92 | 1      |

**Table S90.** Gordes station Kaplan-Meier survival estimates according to SPI-3

| Kaplan-Meier Wet to Dry (SPI3) |        |         |          |         |              |              |
|--------------------------------|--------|---------|----------|---------|--------------|--------------|
|                                |        | n       | events   | median  | 0.95LCL      | 0.95UCL      |
|                                |        | 76      | 76       | 10      | 8            | 12           |
| time                           | n.risk | n.event | survival | std.err | lower 95% CL | upper 95% CL |
| 1                              | 76     | 3       | 0.9605   | 0.0223  | 0.91773      | 1            |
| 3                              | 73     | 1       | 0.9474   | 0.0256  | 0.89847      | 0.9989       |
| 4                              | 72     | 7       | 0.8553   | 0.0404  | 0.77971      | 0.9381       |
| 5                              | 65     | 9       | 0.7368   | 0.0505  | 0.6442       | 0.8428       |
| 6                              | 56     | 5       | 0.6711   | 0.0539  | 0.57332      | 0.7854       |
| 7                              | 51     | 5       | 0.6053   | 0.0561  | 0.50477      | 0.7258       |
| 8                              | 46     | 5       | 0.5395   | 0.0572  | 0.43829      | 0.664        |
| 9                              | 41     | 2       | 0.5132   | 0.0573  | 0.41224      | 0.6388       |
| 10                             | 39     | 4       | 0.4605   | 0.0572  | 0.36106      | 0.5874       |
| 11                             | 35     | 3       | 0.4211   | 0.0566  | 0.32348      | 0.5481       |
| 12                             | 32     | 5       | 0.3553   | 0.0549  | 0.26243      | 0.4809       |
| 13                             | 27     | 2       | 0.3289   | 0.0539  | 0.2386       | 0.4535       |
| 14                             | 25     | 2       | 0.3026   | 0.0527  | 0.21513      | 0.4257       |
| 15                             | 23     | 2       | 0.2763   | 0.0513  | 0.19204      | 0.3976       |
| 16                             | 21     | 3       | 0.2368   | 0.0488  | 0.15819      | 0.3546       |
| 17                             | 18     | 6       | 0.1579   | 0.0418  | 0.09395      | 0.2654       |
| 18                             | 12     | 4       | 0.1053   | 0.0352  | 0.05465      | 0.2027       |
| 19                             | 8      | 2       | 0.0789   | 0.0309  | 0.03663      | 0.1702       |
| 23                             | 6      | 1       | 0.0658   | 0.0284  | 0.0282       | 0.1535       |
| 25                             | 5      | 3       | 0.0263   | 0.0184  | 0.0067       | 0.1033       |
| 27                             | 2      | 1       | 0.0132   | 0.0131  | 0.00188      | 0.0922       |
| 29                             | 1      | 1       | 0        | NaN     | NA           | NA           |

**Table S91.** Gordes station Kaplan-Meier survival estimates according to SPI-6

| Kaplan-Meier Wet to Dry (SPI6) |        |         |          |         |              |              |
|--------------------------------|--------|---------|----------|---------|--------------|--------------|
|                                |        | n       | events   | median  | 0.95LCL      | 0.95UCL      |
|                                |        | 64      | 64       | 8       | 7            | 10           |
| time                           | n.risk | n.event | survival | std.err | lower 95% CL | upper 95% CL |

|    |    |   |        |        |         |       |
|----|----|---|--------|--------|---------|-------|
| 1  | 64 | 4 | 0.9375 | 0.0303 | 0.88003 | 0.999 |
| 2  | 60 | 3 | 0.8906 | 0.039  | 0.81735 | 0.97  |
| 3  | 57 | 3 | 0.8438 | 0.0454 | 0.75932 | 0.938 |
| 4  | 54 | 3 | 0.7969 | 0.0503 | 0.70416 | 0.902 |
| 5  | 51 | 3 | 0.75   | 0.0541 | 0.65108 | 0.864 |
| 6  | 48 | 6 | 0.6562 | 0.0594 | 0.54962 | 0.784 |
| 7  | 42 | 7 | 0.5469 | 0.0622 | 0.43756 | 0.684 |
| 8  | 35 | 4 | 0.4844 | 0.0625 | 0.37619 | 0.624 |
| 9  | 31 | 5 | 0.4062 | 0.0614 | 0.30211 | 0.546 |
| 10 | 26 | 3 | 0.3594 | 0.06   | 0.25911 | 0.498 |
| 11 | 23 | 2 | 0.3281 | 0.0587 | 0.23109 | 0.466 |
| 14 | 21 | 2 | 0.2969 | 0.0571 | 0.20362 | 0.433 |
| 15 | 19 | 2 | 0.2656 | 0.0552 | 0.17675 | 0.399 |
| 16 | 17 | 1 | 0.25   | 0.0541 | 0.16355 | 0.382 |
| 17 | 16 | 1 | 0.2344 | 0.053  | 0.15052 | 0.365 |
| 18 | 15 | 1 | 0.2188 | 0.0517 | 0.13768 | 0.348 |
| 19 | 14 | 1 | 0.2031 | 0.0503 | 0.12503 | 0.33  |
| 20 | 13 | 1 | 0.1875 | 0.0488 | 0.11259 | 0.312 |
| 21 | 12 | 1 | 0.1719 | 0.0472 | 0.10038 | 0.294 |
| 22 | 11 | 1 | 0.1562 | 0.0454 | 0.08842 | 0.276 |
| 26 | 10 | 1 | 0.1406 | 0.0435 | 0.07674 | 0.258 |
| 37 | 9  | 1 | 0.125  | 0.0413 | 0.06537 | 0.239 |
| 38 | 8  | 1 | 0.1094 | 0.039  | 0.05436 | 0.22  |
| 39 | 7  | 2 | 0.0781 | 0.0335 | 0.03367 | 0.181 |
| 43 | 5  | 1 | 0.0625 | 0.0303 | 0.0242  | 0.161 |
| 44 | 4  | 1 | 0.0469 | 0.0264 | 0.01553 | 0.141 |
| 45 | 3  | 1 | 0.0312 | 0.0217 | 0.00799 | 0.122 |
| 46 | 2  | 1 | 0.0156 | 0.0155 | 0.00224 | 0.109 |
| 65 | 1  | 1 | 0      | NaN    | NA      | NA    |

**Table S92.** Gordes station Kaplan-Meier survival estimates according to SPI-12

| Kaplan-Meier Wet to Dry (SPI12) |        |         |          |         |              |              |
|---------------------------------|--------|---------|----------|---------|--------------|--------------|
|                                 |        | n       | events   | median  | 0.95LCL      | 0.95UCL      |
|                                 |        | 63      | 63       | 18      | 15           | 22           |
| time                            | n.risk | n.event | survival | std.err | lower 95% CL | upper 95% CL |
| 1                               | 63     | 1       | 0.9841   | 0.0157  | 0.95374      | 1            |
| 2                               | 62     | 2       | 0.9524   | 0.0268  | 0.90122      | 1            |
| 3                               | 60     | 1       | 0.9365   | 0.0307  | 0.87819      | 0.999        |
| 4                               | 59     | 1       | 0.9206   | 0.0341  | 0.85625      | 0.99         |
| 5                               | 58     | 1       | 0.9048   | 0.037   | 0.8351       | 0.98         |
| 6                               | 57     | 1       | 0.8889   | 0.0396  | 0.81458      | 0.97         |
| 7                               | 56     | 1       | 0.873    | 0.0419  | 0.79455      | 0.959        |
| 8                               | 55     | 3       | 0.8254   | 0.0478  | 0.73678      | 0.925        |

|     |    |   |        |        |         |       |
|-----|----|---|--------|--------|---------|-------|
| 9   | 52 | 2 | 0.7937 | 0.051  | 0.69976 | 0.9   |
| 10  | 50 | 2 | 0.7619 | 0.0537 | 0.66367 | 0.875 |
| 12  | 48 | 3 | 0.7143 | 0.0569 | 0.61101 | 0.835 |
| 13  | 45 | 3 | 0.6667 | 0.0594 | 0.55986 | 0.794 |
| 14  | 42 | 3 | 0.619  | 0.0612 | 0.51003 | 0.751 |
| 15  | 39 | 3 | 0.5714 | 0.0623 | 0.46141 | 0.708 |
| 16  | 36 | 2 | 0.5397 | 0.0628 | 0.42963 | 0.678 |
| 17  | 34 | 2 | 0.5079 | 0.063  | 0.39834 | 0.648 |
| 18  | 32 | 2 | 0.4762 | 0.0629 | 0.36754 | 0.617 |
| 19  | 30 | 2 | 0.4444 | 0.0626 | 0.33722 | 0.586 |
| 20  | 28 | 2 | 0.4127 | 0.062  | 0.3074  | 0.554 |
| 21  | 26 | 2 | 0.381  | 0.0612 | 0.27808 | 0.522 |
| 22  | 24 | 2 | 0.3492 | 0.0601 | 0.24928 | 0.489 |
| 23  | 22 | 2 | 0.3175 | 0.0586 | 0.22103 | 0.456 |
| 24  | 20 | 2 | 0.2857 | 0.0569 | 0.19336 | 0.422 |
| 25  | 18 | 3 | 0.2381 | 0.0537 | 0.15308 | 0.37  |
| 26  | 15 | 2 | 0.2063 | 0.051  | 0.12714 | 0.335 |
| 27  | 13 | 1 | 0.1905 | 0.0495 | 0.11449 | 0.317 |
| 28  | 12 | 1 | 0.1746 | 0.0478 | 0.10207 | 0.299 |
| 29  | 11 | 1 | 0.1587 | 0.046  | 0.0899  | 0.28  |
| 48  | 10 | 1 | 0.1429 | 0.0441 | 0.07802 | 0.262 |
| 49  | 9  | 1 | 0.127  | 0.0419 | 0.06646 | 0.243 |
| 112 | 8  | 1 | 0.1111 | 0.0396 | 0.05526 | 0.223 |
| 113 | 7  | 1 | 0.0952 | 0.037  | 0.04449 | 0.204 |
| 114 | 6  | 1 | 0.0794 | 0.0341 | 0.03423 | 0.184 |
| 115 | 5  | 1 | 0.0635 | 0.0307 | 0.0246  | 0.164 |
| 116 | 4  | 1 | 0.0476 | 0.0268 | 0.01578 | 0.144 |
| 117 | 3  | 1 | 0.0317 | 0.0221 | 0.00812 | 0.124 |
| 118 | 2  | 1 | 0.0159 | 0.0157 | 0.00227 | 0.111 |
| 179 | 1  | 1 | 0      | NaN    | NA      | NA    |

**Table S93.** Gordes station Kaplan-Meier drought risk estimates according to SPI-3, 6, and 12

| Drought Risk (SPI3) |              | Drought Risk (SPI6) |              | Drought Risk (SPI12) |              |
|---------------------|--------------|---------------------|--------------|----------------------|--------------|
| Time                | Drought Risk | Time                | Drought Risk | Time                 | Drought Risk |
| 1                   | 0.0395       | 1                   | 0.0625       | 1                    | 0.0159       |
| 3                   | 0.0526       | 2                   | 0.1094       | 2                    | 0.0476       |
| 4                   | 0.1447       | 3                   | 0.1562       | 3                    | 0.0635       |
| 5                   | 0.2632       | 4                   | 0.2031       | 4                    | 0.0794       |
| 6                   | 0.3289       | 5                   | 0.25         | 5                    | 0.0952       |
| 7                   | 0.3947       | 6                   | 0.3438       | 6                    | 0.1111       |
| 8                   | 0.4605       | 7                   | 0.4531       | 7                    | 0.127        |
| 9                   | 0.4868       | 8                   | 0.5156       | 8                    | 0.1746       |
| 10                  | 0.5395       | 9                   | 0.5938       | 9                    | 0.2063       |
| 11                  | 0.5789       | 10                  | 0.6406       | 10                   | 0.2381       |

|    |        |    |        |     |        |
|----|--------|----|--------|-----|--------|
| 12 | 0.6447 | 11 | 0.6719 | 12  | 0.2857 |
| 13 | 0.6711 | 12 | 0.6823 | 13  | 0.3333 |
| 14 | 0.6974 | 14 | 0.7031 | 14  | 0.381  |
| 15 | 0.7237 | 15 | 0.7344 | 15  | 0.4286 |
| 16 | 0.7632 | 16 | 0.75   | 16  | 0.4603 |
| 17 | 0.8421 | 17 | 0.7656 | 17  | 0.4921 |
| 18 | 0.8947 | 18 | 0.7812 | 18  | 0.5238 |
| 19 | 0.9211 | 19 | 0.7969 | 19  | 0.5556 |
| 23 | 0.9342 | 20 | 0.8125 | 20  | 0.5873 |
| 25 | 0.9737 | 21 | 0.8281 | 21  | 0.619  |
| 27 | 0.9868 | 22 | 0.8438 | 22  | 0.6508 |
| 29 | 1      | 26 | 0.8594 | 23  | 0.6825 |
|    |        | 37 | 0.875  | 24  | 0.7143 |
|    |        | 38 | 0.8906 | 25  | 0.7619 |
|    |        | 39 | 0.9219 | 26  | 0.7937 |
|    |        | 43 | 0.9375 | 27  | 0.8095 |
|    |        | 44 | 0.9531 | 28  | 0.8254 |
|    |        | 45 | 0.9688 | 29  | 0.8413 |
|    |        | 46 | 0.9844 | 48  | 0.8571 |
|    |        | 65 | 1      | 49  | 0.873  |
|    |        |    |        | 112 | 0.8889 |
|    |        |    |        | 113 | 0.9048 |
|    |        |    |        | 114 | 0.9206 |
|    |        |    |        | 115 | 0.9365 |
|    |        |    |        | 116 | 0.9524 |
|    |        |    |        | 117 | 0.9683 |
|    |        |    |        | 118 | 0.9841 |
|    |        |    |        | 179 | 1      |

**Table S94.** Gordes station Kaplan-Meier survival estimates according to SPEI-3

| Kaplan-Meier Wet to Dry (SPEI3) |        |         |          |         |              |              |
|---------------------------------|--------|---------|----------|---------|--------------|--------------|
|                                 |        | n       | events   | median  | 0.95LCL      | 0.95UCL      |
|                                 |        | 88      | 88       | 7       | 6            | 10           |
| time                            | n.risk | n.event | survival | std.err | lower 95% CI | upper 95% CI |
| 1                               | 88     | 5       | 0.9432   | 0.0247  | 0.896        | 0.993        |
| 2                               | 83     | 4       | 0.8977   | 0.0323  | 0.8366       | 0.963        |
| 3                               | 79     | 7       | 0.8182   | 0.0411  | 0.7414       | 0.903        |
| 4                               | 72     | 8       | 0.7273   | 0.0475  | 0.6399       | 0.827        |
| 5                               | 64     | 7       | 0.6477   | 0.0509  | 0.5552       | 0.756        |
| 6                               | 57     | 8       | 0.5568   | 0.053   | 0.4621       | 0.671        |
| 7                               | 49     | 6       | 0.4886   | 0.0533  | 0.3946       | 0.605        |
| 8                               | 43     | 5       | 0.4318   | 0.0528  | 0.3398       | 0.549        |
| 9                               | 38     | 4       | 0.3864   | 0.0519  | 0.2969       | 0.503        |



|    |    |   |        |        |        |       |
|----|----|---|--------|--------|--------|-------|
| 10 | 34 | 4 | 0.3409 | 0.0505 | 0.255  | 0.456 |
| 11 | 30 | 2 | 0.3182 | 0.0497 | 0.2343 | 0.432 |
| 12 | 28 | 1 | 0.3068 | 0.0492 | 0.2241 | 0.42  |
| 13 | 27 | 2 | 0.2841 | 0.0481 | 0.2039 | 0.396 |
| 16 | 25 | 1 | 0.2727 | 0.0475 | 0.1939 | 0.384 |
| 17 | 24 | 3 | 0.2386 | 0.0454 | 0.1643 | 0.347 |
| 18 | 21 | 4 | 0.1932 | 0.0421 | 0.126  | 0.296 |
| 19 | 17 | 2 | 0.1705 | 0.0401 | 0.1075 | 0.27  |
| 20 | 15 | 2 | 0.1477 | 0.0378 | 0.0894 | 0.244 |
| 21 | 13 | 2 | 0.125  | 0.0353 | 0.0719 | 0.217 |
| 22 | 11 | 2 | 0.1023 | 0.0323 | 0.0551 | 0.19  |
| 23 | 9  | 1 | 0.0909 | 0.0306 | 0.047  | 0.176 |
| 25 | 8  | 1 | 0.0795 | 0.0288 | 0.0391 | 0.162 |
| 26 | 7  | 1 | 0.0682 | 0.0269 | 0.0315 | 0.148 |
| 41 | 6  | 1 | 0.0568 | 0.0247 | 0.0243 | 0.133 |
| 42 | 5  | 2 | 0.0341 | 0.0193 | 0.0112 | 0.104 |
| 43 | 3  | 3 | 0      | NaN    | NA     | NA    |

**Table S95.** Gordes station Kaplan-Meier survival estimates according to SPEI-6

| Kaplan-Meier Wet to Dry (SPEI6) |        |         |          |         |              |              |
|---------------------------------|--------|---------|----------|---------|--------------|--------------|
|                                 |        | n       | events   | median  | 0.95LCL      | 0.95UCL      |
|                                 |        | 91      | 91       | 7       | 6            | 10           |
| time                            | n.risk | n.event | survival | std.err | lower 95% CI | upper 95% CI |
| 1                               | 91     | 6       | 0.9341   | 0.026   | 0.88444      | 0.9865       |
| 2                               | 85     | 9       | 0.8352   | 0.0389  | 0.76231      | 0.915        |
| 3                               | 76     | 8       | 0.7473   | 0.0456  | 0.66309      | 0.8421       |
| 4                               | 68     | 6       | 0.6813   | 0.0488  | 0.592        | 0.7841       |
| 5                               | 62     | 5       | 0.6264   | 0.0507  | 0.53446      | 0.7341       |
| 6                               | 57     | 6       | 0.5604   | 0.052   | 0.4672       | 0.6723       |
| 7                               | 51     | 6       | 0.4945   | 0.0524  | 0.40175      | 0.6087       |
| 8                               | 45     | 5       | 0.4396   | 0.052   | 0.34855      | 0.5543       |
| 9                               | 40     | 4       | 0.3956   | 0.0513  | 0.30688      | 0.51         |
| 10                              | 36     | 4       | 0.3516   | 0.0501  | 0.26604      | 0.4648       |
| 11                              | 32     | 2       | 0.3297   | 0.0493  | 0.24595      | 0.4419       |
| 12                              | 30     | 2       | 0.3077   | 0.0484  | 0.22608      | 0.4188       |
| 13                              | 28     | 1       | 0.2967   | 0.0479  | 0.21624      | 0.4071       |
| 14                              | 27     | 2       | 0.2747   | 0.0468  | 0.19675      | 0.3836       |
| 15                              | 25     | 2       | 0.2527   | 0.0456  | 0.17752      | 0.3598       |
| 16                              | 23     | 2       | 0.2308   | 0.0442  | 0.15859      | 0.3358       |
| 17                              | 21     | 3       | 0.1978   | 0.0418  | 0.13078      | 0.2992       |
| 18                              | 18     | 1       | 0.1868   | 0.0409  | 0.12169      | 0.2868       |
| 19                              | 17     | 2       | 0.1648   | 0.0389  | 0.1038       | 0.2618       |
| 20                              | 15     | 1       | 0.1538   | 0.0378  | 0.09502      | 0.2491       |
| 22                              | 14     | 1       | 0.1429   | 0.0367  | 0.08636      | 0.2363       |
| 23                              | 13     | 2       | 0.1209   | 0.0342  | 0.06946      | 0.2104       |
| 24                              | 11     | 1       | 0.1099   | 0.0328  | 0.06124      | 0.1972       |
| 40                              | 10     | 1       | 0.0989   | 0.0313  | 0.05319      | 0.1839       |
| 41                              | 9      | 1       | 0.0879   | 0.0297  | 0.04536      | 0.1704       |
| 42                              | 8      | 2       | 0.0659   | 0.026   | 0.03043      | 0.1429       |
| 43                              | 6      | 2       | 0.044    | 0.0215  | 0.01686      | 0.1146       |
| 44                              | 4      | 2       | 0.022    | 0.0154  | 0.00558      | 0.0865       |
| 45                              | 2      | 1       | 0.011    | 0.0109  | 0.00156      | 0.0772       |
| 104                             | 1      | 1       | 0        | NaN     | NA           | NA           |

**Table S96.** Gordes station Kaplan-Meier survival estimates according to SPEI-12

| Kaplan-Meier Wet to Dry (SPEI12) |        |         |          |         |              |              |
|----------------------------------|--------|---------|----------|---------|--------------|--------------|
|                                  |        | n       | events   | median  | 0.95LCL      | 0.95UCL      |
|                                  |        | 84      | 84       | 16      | 14           | 19           |
| time                             | n.risk | n.event | survival | std.err | lower 95% CI | upper 95% CI |

|     |    |   |        |        |         |        |
|-----|----|---|--------|--------|---------|--------|
| 1   | 84 | 2 | 0.9762 | 0.0166 | 0.94413 | 10.000 |
| 2   | 82 | 2 | 0.9524 | 0.0232 | 0.90791 | 0.999  |
| 3   | 80 | 2 | 0.9286 | 0.0281 | 0.8751  | 0.9853 |
| 4   | 78 | 2 | 0.9048 | 0.032  | 0.84412 | 0.9698 |
| 5   | 76 | 2 | 0.881  | 0.0353 | 0.81435 | 0.953  |
| 6   | 74 | 2 | 0.8571 | 0.0382 | 0.78548 | 0.9353 |
| 7   | 72 | 3 | 0.8214 | 0.0418 | 0.74348 | 0.9076 |
| 8   | 69 | 3 | 0.7857 | 0.0448 | 0.70269 | 0.8785 |
| 9   | 66 | 3 | 0.75   | 0.0472 | 0.66289 | 0.8486 |
| 10  | 63 | 3 | 0.7143 | 0.0493 | 0.62393 | 0.8177 |
| 11  | 60 | 2 | 0.6905 | 0.0504 | 0.59837 | 0.7968 |
| 12  | 58 | 4 | 0.6429 | 0.0523 | 0.54814 | 0.7539 |
| 13  | 54 | 3 | 0.6071 | 0.0533 | 0.51119 | 0.7211 |
| 14  | 51 | 4 | 0.5595 | 0.0542 | 0.46282 | 0.6764 |
| 15  | 47 | 4 | 0.5119 | 0.0545 | 0.41543 | 0.6308 |
| 16  | 43 | 4 | 0.4643 | 0.0544 | 0.369   | 0.5842 |
| 17  | 39 | 3 | 0.4286 | 0.054  | 0.3348  | 0.5486 |
| 18  | 36 | 4 | 0.381  | 0.053  | 0.29005 | 0.5003 |
| 19  | 32 | 3 | 0.3452 | 0.0519 | 0.25717 | 0.4635 |
| 20  | 29 | 2 | 0.3214 | 0.051  | 0.23558 | 0.4386 |
| 21  | 27 | 2 | 0.2976 | 0.0499 | 0.21428 | 0.4134 |
| 22  | 25 | 2 | 0.2738 | 0.0487 | 0.19329 | 0.3879 |
| 23  | 23 | 4 | 0.2262 | 0.0456 | 0.1523  | 0.3359 |
| 24  | 19 | 3 | 0.1905 | 0.0428 | 0.12257 | 0.296  |
| 25  | 16 | 1 | 0.1786 | 0.0418 | 0.11288 | 0.2825 |
| 26  | 15 | 1 | 0.1667 | 0.0407 | 0.10332 | 0.2689 |
| 27  | 14 | 1 | 0.1548 | 0.0395 | 0.09389 | 0.2551 |
| 28  | 13 | 1 | 0.1429 | 0.0382 | 0.08461 | 0.2412 |
| 29  | 12 | 1 | 0.131  | 0.0368 | 0.07548 | 0.2272 |
| 30  | 11 | 1 | 0.119  | 0.0353 | 0.06654 | 0.213  |
| 31  | 10 | 1 | 0.1071 | 0.0337 | 0.05779 | 0.1986 |
| 32  | 9  | 1 | 0.0952 | 0.032  | 0.04927 | 0.1841 |
| 33  | 8  | 1 | 0.0833 | 0.0302 | 0.041   | 0.1694 |
| 34  | 7  | 1 | 0.0714 | 0.0281 | 0.03304 | 0.1544 |
| 35  | 6  | 1 | 0.0595 | 0.0258 | 0.02544 | 0.1393 |
| 36  | 5  | 1 | 0.0476 | 0.0232 | 0.0183  | 0.1239 |
| 37  | 4  | 1 | 0.0357 | 0.0202 | 0.01176 | 0.1085 |
| 112 | 3  | 1 | 0.0238 | 0.0166 | 0.00605 | 0.0936 |
| 113 | 2  | 1 | 0.0119 | 0.0118 | 0.0017  | 0.0835 |
| 181 | 1  | 1 | 0      | NaN    | NA      | NA     |

**Table S97.** Gordes station Kaplan-Meier drought risk estimates according to SPEI-3, 6, and 12

| Drought Risk (SPEI3) |              | Drought Risk (SPEI6) |              | Drought Risk (SPEI12) |              |
|----------------------|--------------|----------------------|--------------|-----------------------|--------------|
| Time                 | Drought Risk | Time                 | Drought Risk | Time                  | Drought Risk |

|    |        |     |        |     |        |
|----|--------|-----|--------|-----|--------|
| 1  | 0.0568 | 1   | 0.0659 | 1   | 0.0238 |
| 2  | 0.1023 | 2   | 0.1648 | 2   | 0.0476 |
| 3  | 0.1818 | 3   | 0.2527 | 3   | 0.0714 |
| 4  | 0.2727 | 4   | 0.3187 | 4   | 0.0952 |
| 5  | 0.3523 | 5   | 0.3736 | 5   | 0.119  |
| 6  | 0.4432 | 6   | 0.4396 | 6   | 0.1429 |
| 7  | 0.5114 | 7   | 0.5055 | 7   | 0.1786 |
| 8  | 0.5682 | 8   | 0.5604 | 8   | 0.2143 |
| 9  | 0.6136 | 9   | 0.6044 | 9   | 0.25   |
| 10 | 0.6591 | 10  | 0.6484 | 10  | 0.2857 |
| 11 | 0.6818 | 11  | 0.6703 | 11  | 0.3095 |
| 12 | 0.6932 | 12  | 0.6923 | 12  | 0.3571 |
| 13 | 0.7159 | 13  | 0.7033 | 13  | 0.3929 |
| 16 | 0.7273 | 14  | 0.7253 | 14  | 0.4405 |
| 17 | 0.7614 | 15  | 0.7473 | 15  | 0.4881 |
| 18 | 0.8068 | 16  | 0.7692 | 16  | 0.5357 |
| 19 | 0.8295 | 17  | 0.8022 | 17  | 0.5714 |
| 20 | 0.8523 | 18  | 0.8132 | 18  | 0.619  |
| 21 | 0.875  | 19  | 0.8352 | 19  | 0.6548 |
| 22 | 0.8977 | 20  | 0.8462 | 20  | 0.6786 |
| 23 | 0.9091 | 22  | 0.8571 | 21  | 0.7024 |
| 25 | 0.9205 | 23  | 0.8791 | 22  | 0.7262 |
| 26 | 0.9318 | 24  | 0.8901 | 23  | 0.7738 |
| 41 | 0.9432 | 40  | 0.9011 | 24  | 0.8095 |
| 42 | 0.9659 | 41  | 0.9121 | 25  | 0.8214 |
| 43 | 1      | 42  | 0.9341 | 26  | 0.8333 |
|    |        | 43  | 0.956  | 27  | 0.8452 |
|    |        | 44  | 0.978  | 28  | 0.8571 |
|    |        | 45  | 0.989  | 29  | 0.869  |
|    |        | 104 | 1      | 30  | 0.881  |
|    |        |     |        | 31  | 0.8929 |
|    |        |     |        | 32  | 0.9048 |
|    |        |     |        | 33  | 0.9167 |
|    |        |     |        | 34  | 0.9286 |
|    |        |     |        | 35  | 0.9405 |
|    |        |     |        | 36  | 0.9524 |
|    |        |     |        | 37  | 0.9643 |
|    |        |     |        | 112 | 0.9762 |
|    |        |     |        | 113 | 0.9881 |
|    |        |     |        | 181 | 1      |

**Table S98.** Guney station Kaplan-Meier survival estimates according to SPI-3

| Kaplan-Meier Wet to Dry (SPI3) |  |   |        |        |         |         |
|--------------------------------|--|---|--------|--------|---------|---------|
|                                |  | n | events | median | 0.95LCL | 0.95UCL |

|      |        | 134     | 134      | 9       | 8            | 11           |
|------|--------|---------|----------|---------|--------------|--------------|
| time | n.risk | n.event | survival | std.err | lower 95% CL | upper 95% CL |
| 1    | 134    | 6       | 0.95522  | 0.01787 | 0.92084      | 0.9909       |
| 2    | 128    | 4       | 0.92537  | 0.0227  | 0.88193      | 0.971        |
| 3    | 124    | 11      | 0.84328  | 0.0314  | 0.78392      | 0.9071       |
| 4    | 113    | 10      | 0.76866  | 0.03643 | 0.70047      | 0.8435       |
| 5    | 103    | 9       | 0.70149  | 0.03953 | 0.62814      | 0.7834       |
| 6    | 94     | 5       | 0.66418  | 0.0408  | 0.58884      | 0.7492       |
| 7    | 89     | 7       | 0.61194  | 0.0421  | 0.53475      | 0.7003       |
| 8    | 82     | 10      | 0.53731  | 0.04307 | 0.45919      | 0.6287       |
| 9    | 72     | 7       | 0.48507  | 0.04317 | 0.40742      | 0.5775       |
| 10   | 65     | 5       | 0.44776  | 0.04296 | 0.37101      | 0.5404       |
| 11   | 60     | 7       | 0.39552  | 0.04224 | 0.32082      | 0.4876       |
| 12   | 53     | 5       | 0.35821  | 0.04142 | 0.28557      | 0.4493       |
| 13   | 48     | 6       | 0.31343  | 0.04007 | 0.24396      | 0.4027       |
| 14   | 42     | 4       | 0.28358  | 0.03894 | 0.21667      | 0.3712       |
| 15   | 38     | 5       | 0.24627  | 0.03722 | 0.18313      | 0.3312       |
| 16   | 33     | 6       | 0.20149  | 0.03465 | 0.14384      | 0.2823       |
| 17   | 27     | 6       | 0.15672  | 0.0314  | 0.10581      | 0.2321       |
| 18   | 21     | 3       | 0.13433  | 0.02946 | 0.0874       | 0.2065       |
| 19   | 18     | 1       | 0.12687  | 0.02875 | 0.08136      | 0.1978       |
| 20   | 17     | 1       | 0.1194   | 0.02801 | 0.07539      | 0.1891       |
| 21   | 16     | 1       | 0.11194  | 0.02724 | 0.06948      | 0.1803       |
| 22   | 15     | 1       | 0.10448  | 0.02642 | 0.06364      | 0.1715       |
| 23   | 14     | 2       | 0.08955  | 0.02467 | 0.05219      | 0.1537       |
| 24   | 12     | 1       | 0.08209  | 0.02371 | 0.0466       | 0.1446       |
| 25   | 11     | 1       | 0.07463  | 0.0227  | 0.04111      | 0.1355       |
| 26   | 10     | 2       | 0.0597   | 0.02047 | 0.03049      | 0.1169       |
| 30   | 8      | 1       | 0.05224  | 0.01922 | 0.0254       | 0.1074       |
| 31   | 7      | 1       | 0.04478  | 0.01787 | 0.02048      | 0.0979       |
| 32   | 6      | 1       | 0.03731  | 0.01637 | 0.01579      | 0.0882       |
| 33   | 5      | 1       | 0.02985  | 0.0147  | 0.01137      | 0.0784       |
| 40   | 4      | 1       | 0.02239  | 0.01278 | 0.00731      | 0.0685       |
| 56   | 3      | 1       | 0.01493  | 0.01047 | 0.00377      | 0.0591       |
| 57   | 2      | 1       | 0.00746  | 0.00743 | 0.00106      | 0.0526       |
| 58   | 1      | 1       | 0        | NaN     | NA           | NA           |

**Table S99.** Guney station Kaplan-Meier survival estimates according to SPI-6

| Kaplan-Meier Wet to Dry (SPI6) |        |         |          |         |              |              |
|--------------------------------|--------|---------|----------|---------|--------------|--------------|
|                                |        | n       | events   | median  | 0.95LCL      | 0.95UCL      |
|                                |        | 120     | 120      | 14      | 10           | 16           |
| time                           | n.risk | n.event | survival | std.err | lower 95% CL | upper 95% CL |
| 1                              | 120    | 4       | 0.96667  | 0.0164  | 0.93508      | 0.9993       |
| 2                              | 116    | 9       | 0.89167  | 0.0284  | 0.83776      | 0.949        |

|    |     |    |         |        |         |        |
|----|-----|----|---------|--------|---------|--------|
| 3  | 107 | 10 | 0.80833 | 0.0359 | 0.74089 | 0.8819 |
| 4  | 97  | 7  | 0.75    | 0.0395 | 0.67639 | 0.8316 |
| 5  | 90  | 3  | 0.725   | 0.0408 | 0.64935 | 0.8095 |
| 6  | 87  | 3  | 0.7     | 0.0418 | 0.62263 | 0.787  |
| 7  | 84  | 3  | 0.675   | 0.0428 | 0.59619 | 0.7642 |
| 8  | 81  | 5  | 0.63333 | 0.044  | 0.55272 | 0.7257 |
| 9  | 76  | 3  | 0.60833 | 0.0446 | 0.52698 | 0.7022 |
| 10 | 73  | 4  | 0.575   | 0.0451 | 0.49302 | 0.6706 |
| 11 | 69  | 3  | 0.55    | 0.0454 | 0.46782 | 0.6466 |
| 12 | 66  | 2  | 0.53333 | 0.0455 | 0.45114 | 0.6305 |
| 13 | 64  | 3  | 0.50833 | 0.0456 | 0.42631 | 0.6061 |
| 14 | 61  | 5  | 0.46667 | 0.0455 | 0.38542 | 0.565  |
| 15 | 56  | 4  | 0.43333 | 0.0452 | 0.35315 | 0.5317 |
| 16 | 52  | 5  | 0.39167 | 0.0446 | 0.31338 | 0.4895 |
| 17 | 47  | 4  | 0.35833 | 0.0438 | 0.28204 | 0.4553 |
| 18 | 43  | 3  | 0.33333 | 0.043  | 0.25881 | 0.4293 |
| 19 | 40  | 4  | 0.3     | 0.0418 | 0.22826 | 0.3943 |
| 20 | 36  | 1  | 0.29167 | 0.0415 | 0.2207  | 0.3855 |
| 21 | 35  | 1  | 0.28333 | 0.0411 | 0.21317 | 0.3766 |
| 22 | 34  | 1  | 0.275   | 0.0408 | 0.20567 | 0.3677 |
| 23 | 33  | 3  | 0.25    | 0.0395 | 0.18338 | 0.3408 |
| 24 | 30  | 3  | 0.225   | 0.0381 | 0.16142 | 0.3136 |
| 25 | 27  | 3  | 0.2     | 0.0365 | 0.13984 | 0.286  |
| 26 | 24  | 3  | 0.175   | 0.0347 | 0.11867 | 0.2581 |
| 27 | 21  | 2  | 0.15833 | 0.0333 | 0.10481 | 0.2392 |
| 28 | 19  | 2  | 0.14167 | 0.0318 | 0.0912  | 0.2201 |
| 29 | 17  | 2  | 0.125   | 0.0302 | 0.07786 | 0.2007 |
| 33 | 15  | 1  | 0.11667 | 0.0293 | 0.07131 | 0.1909 |
| 34 | 14  | 1  | 0.10833 | 0.0284 | 0.06484 | 0.181  |
| 35 | 13  | 3  | 0.08333 | 0.0252 | 0.04604 | 0.1508 |
| 36 | 10  | 1  | 0.075   | 0.024  | 0.04001 | 0.1406 |
| 37 | 9   | 1  | 0.06667 | 0.0228 | 0.03413 | 0.1302 |
| 38 | 8   | 1  | 0.05833 | 0.0214 | 0.02843 | 0.1197 |
| 47 | 7   | 1  | 0.05    | 0.0199 | 0.02292 | 0.1091 |
| 48 | 6   | 1  | 0.04167 | 0.0182 | 0.01767 | 0.0983 |
| 49 | 5   | 1  | 0.03333 | 0.0164 | 0.01272 | 0.0874 |
| 50 | 4   | 1  | 0.025   | 0.0143 | 0.00818 | 0.0764 |
| 57 | 3   | 1  | 0.01667 | 0.0117 | 0.00422 | 0.0659 |
| 74 | 2   | 1  | 0.00833 | 0.0083 | 0.00118 | 0.0587 |
| 75 | 1   | 1  | 0       | NaN    | NA      | NA     |

**Table S100.** Guney station Kaplan-Meier survival estimates according to SPI-12

| Kaplan-Meier Wet to Dry (SPI12) |  |   |        |        |         |         |
|---------------------------------|--|---|--------|--------|---------|---------|
|                                 |  | n | events | median | 0.95LCL | 0.95UCL |

|      |        | 109     | 109      | 26      | 20           | 34           |
|------|--------|---------|----------|---------|--------------|--------------|
| time | n.risk | n.event | survival | std.err | lower 95% CL | upper 95% CL |
| 1    | 109    | 4       | 0.9633   | 0.01801 | 0.92864      | 0.9993       |
| 2    | 105    | 5       | 0.91743  | 0.02636 | 0.86719      | 0.9706       |
| 3    | 100    | 5       | 0.87156  | 0.03205 | 0.81096      | 0.9367       |
| 4    | 95     | 2       | 0.85321  | 0.0339  | 0.78929      | 0.9223       |
| 5    | 93     | 1       | 0.84404  | 0.03475 | 0.7786       | 0.915        |
| 11   | 92     | 1       | 0.83486  | 0.03556 | 0.76799      | 0.9076       |
| 12   | 91     | 3       | 0.80734  | 0.03778 | 0.73659      | 0.8849       |
| 13   | 88     | 5       | 0.76147  | 0.04082 | 0.68552      | 0.8458       |
| 14   | 83     | 4       | 0.72477  | 0.04278 | 0.64559      | 0.8137       |
| 15   | 79     | 3       | 0.69725  | 0.04401 | 0.61612      | 0.7891       |
| 16   | 76     | 3       | 0.66972  | 0.04505 | 0.58701      | 0.7641       |
| 17   | 73     | 2       | 0.65138  | 0.04564 | 0.56779      | 0.7473       |
| 18   | 71     | 3       | 0.62385  | 0.0464  | 0.53923      | 0.7218       |
| 19   | 68     | 3       | 0.59633  | 0.04699 | 0.51098      | 0.6959       |
| 20   | 65     | 2       | 0.57798  | 0.04731 | 0.49232      | 0.6785       |
| 21   | 63     | 1       | 0.56881  | 0.04744 | 0.48304      | 0.6698       |
| 22   | 62     | 1       | 0.55963  | 0.04755 | 0.47378      | 0.661        |
| 23   | 61     | 1       | 0.55046  | 0.04765 | 0.46456      | 0.6522       |
| 24   | 60     | 2       | 0.53211  | 0.04779 | 0.44622      | 0.6345       |
| 25   | 58     | 2       | 0.51376  | 0.04787 | 0.428        | 0.6167       |
| 26   | 56     | 2       | 0.49541  | 0.04789 | 0.40991      | 0.5988       |
| 27   | 54     | 1       | 0.48624  | 0.04787 | 0.40091      | 0.5897       |
| 28   | 53     | 2       | 0.46789  | 0.04779 | 0.383        | 0.5716       |
| 29   | 51     | 2       | 0.44954  | 0.04765 | 0.36522      | 0.5533       |
| 30   | 49     | 1       | 0.44037  | 0.04755 | 0.35637      | 0.5442       |
| 31   | 48     | 1       | 0.43119  | 0.04744 | 0.34756      | 0.5349       |
| 32   | 47     | 1       | 0.42202  | 0.04731 | 0.33878      | 0.5257       |
| 33   | 46     | 1       | 0.41284  | 0.04716 | 0.33003      | 0.5164       |
| 34   | 45     | 2       | 0.3945   | 0.04681 | 0.31263      | 0.4978       |
| 35   | 43     | 1       | 0.38532  | 0.04661 | 0.30398      | 0.4884       |
| 36   | 42     | 2       | 0.36697  | 0.04617 | 0.28678      | 0.4696       |
| 37   | 40     | 2       | 0.34862  | 0.04564 | 0.26972      | 0.4506       |
| 38   | 38     | 2       | 0.33028  | 0.04505 | 0.2528       | 0.4315       |
| 39   | 36     | 2       | 0.31193  | 0.04437 | 0.23603      | 0.4122       |
| 40   | 34     | 2       | 0.29358  | 0.04362 | 0.21941      | 0.3928       |
| 41   | 32     | 2       | 0.27523  | 0.04278 | 0.20295      | 0.3732       |
| 42   | 30     | 1       | 0.26606  | 0.04233 | 0.19479      | 0.3634       |
| 43   | 29     | 1       | 0.25688  | 0.04185 | 0.18666      | 0.3535       |
| 44   | 28     | 1       | 0.24771  | 0.04135 | 0.17859      | 0.3436       |
| 45   | 27     | 1       | 0.23853  | 0.04082 | 0.17056      | 0.3336       |
| 46   | 26     | 1       | 0.22936  | 0.04027 | 0.16258      | 0.3236       |
| 47   | 25     | 2       | 0.21101  | 0.03908 | 0.14677      | 0.3034       |
| 48   | 23     | 3       | 0.18349  | 0.03707 | 0.12349      | 0.2726       |

|     |    |   |         |         |         |        |
|-----|----|---|---------|---------|---------|--------|
| 49  | 20 | 1 | 0.17431 | 0.03634 | 0.11585 | 0.2623 |
| 50  | 19 | 1 | 0.16514 | 0.03556 | 0.10828 | 0.2519 |
| 51  | 18 | 1 | 0.15596 | 0.03475 | 0.10078 | 0.2414 |
| 52  | 17 | 1 | 0.14679 | 0.0339  | 0.09335 | 0.2308 |
| 53  | 16 | 1 | 0.13761 | 0.033   | 0.08601 | 0.2202 |
| 54  | 15 | 1 | 0.12844 | 0.03205 | 0.07876 | 0.2095 |
| 55  | 14 | 1 | 0.11927 | 0.03104 | 0.07161 | 0.1986 |
| 56  | 13 | 1 | 0.11009 | 0.02998 | 0.06456 | 0.1877 |
| 57  | 12 | 1 | 0.10092 | 0.02885 | 0.05763 | 0.1767 |
| 58  | 11 | 1 | 0.09174 | 0.02765 | 0.05082 | 0.1656 |
| 59  | 10 | 1 | 0.08257 | 0.02636 | 0.04416 | 0.1544 |
| 60  | 9  | 1 | 0.07339 | 0.02498 | 0.03767 | 0.143  |
| 82  | 8  | 1 | 0.06422 | 0.02348 | 0.03137 | 0.1315 |
| 83  | 7  | 1 | 0.05505 | 0.02185 | 0.02529 | 0.1198 |
| 87  | 6  | 1 | 0.04587 | 0.02004 | 0.01949 | 0.108  |
| 91  | 5  | 1 | 0.0367  | 0.01801 | 0.01403 | 0.096  |
| 92  | 4  | 1 | 0.02752 | 0.01567 | 0.00902 | 0.084  |
| 101 | 3  | 1 | 0.01835 | 0.01285 | 0.00465 | 0.0724 |
| 102 | 2  | 1 | 0.00917 | 0.00913 | 0.0013  | 0.0645 |
| 103 | 1  | 1 | 0       | NaN     | NA      | NA     |

**Table S101.** Guney station Kaplan-Meier drought risk estimates according to SPI-3, 6, and 12

| Drought Risk (SPI3) |              | Drought Risk (SPI6) |              | Drought Risk (SPI12) |              |
|---------------------|--------------|---------------------|--------------|----------------------|--------------|
| Time                | Drought Risk | Time                | Drought Risk | Time                 | Drought Risk |
| 1                   | 0.04478      | 1                   | 0.03333      | 1                    | 0.0367       |
| 2                   | 0.07463      | 2                   | 0.10833      | 2                    | 0.08257      |
| 3                   | 0.15672      | 3                   | 0.19167      | 3                    | 0.12844      |
| 4                   | 0.23134      | 4                   | 0.25         | 4                    | 0.14679      |
| 5                   | 0.29851      | 5                   | 0.275        | 5                    | 0.15596      |
| 6                   | 0.33582      | 6                   | 0.3          | 6                    | 0.15749      |
| 7                   | 0.38806      | 7                   | 0.325        | 11                   | 0.16514      |
| 8                   | 0.46269      | 8                   | 0.36667      | 12                   | 0.19266      |
| 9                   | 0.51493      | 9                   | 0.39167      | 13                   | 0.23853      |
| 10                  | 0.55224      | 10                  | 0.425        | 14                   | 0.27523      |
| 11                  | 0.60448      | 11                  | 0.45         | 15                   | 0.30275      |
| 12                  | 0.64179      | 12                  | 0.46667      | 16                   | 0.33028      |
| 13                  | 0.68657      | 13                  | 0.49167      | 17                   | 0.34862      |
| 14                  | 0.71642      | 14                  | 0.53333      | 18                   | 0.37615      |
| 15                  | 0.75373      | 15                  | 0.56667      | 19                   | 0.40367      |
| 16                  | 0.79851      | 16                  | 0.60833      | 20                   | 0.42202      |
| 17                  | 0.84328      | 17                  | 0.64167      | 21                   | 0.43119      |
| 18                  | 0.86567      | 18                  | 0.66667      | 22                   | 0.44037      |
| 19                  | 0.87313      | 19                  | 0.7          | 23                   | 0.44954      |
| 20                  | 0.8806       | 20                  | 0.70833      | 24                   | 0.46789      |



|    |         |    |         |     |         |
|----|---------|----|---------|-----|---------|
| 21 | 0.88806 | 21 | 0.71667 | 25  | 0.48624 |
| 22 | 0.89552 | 22 | 0.725   | 26  | 0.50459 |
| 23 | 0.91045 | 23 | 0.75    | 27  | 0.51376 |
| 24 | 0.91791 | 24 | 0.775   | 28  | 0.53211 |
| 25 | 0.92537 | 25 | 0.8     | 29  | 0.55046 |
| 26 | 0.9403  | 26 | 0.825   | 30  | 0.55963 |
| 30 | 0.94776 | 27 | 0.84167 | 31  | 0.56881 |
| 31 | 0.95522 | 28 | 0.85833 | 32  | 0.57798 |
| 32 | 0.96269 | 29 | 0.875   | 33  | 0.58716 |
| 33 | 0.97015 | 33 | 0.88333 | 34  | 0.6055  |
| 40 | 0.97761 | 34 | 0.89167 | 35  | 0.61468 |
| 56 | 0.98507 | 35 | 0.91667 | 36  | 0.63303 |
| 57 | 0.99254 | 36 | 0.925   | 37  | 0.65138 |
| 58 | 1       | 37 | 0.93333 | 38  | 0.66972 |
|    |         | 38 | 0.94167 | 39  | 0.68807 |
|    |         | 47 | 0.95    | 40  | 0.70642 |
|    |         | 48 | 0.95833 | 41  | 0.72477 |
|    |         | 49 | 0.96667 | 42  | 0.73394 |
|    |         | 50 | 0.975   | 43  | 0.74312 |
|    |         | 57 | 0.98333 | 44  | 0.75229 |
|    |         | 74 | 0.99167 | 45  | 0.76147 |
|    |         | 75 | 1       | 46  | 0.77064 |
|    |         |    |         | 47  | 0.78899 |
|    |         |    |         | 48  | 0.81651 |
|    |         |    |         | 49  | 0.82569 |
|    |         |    |         | 50  | 0.83486 |
|    |         |    |         | 51  | 0.84404 |
|    |         |    |         | 52  | 0.85321 |
|    |         |    |         | 53  | 0.86239 |
|    |         |    |         | 54  | 0.87156 |
|    |         |    |         | 55  | 0.88073 |
|    |         |    |         | 56  | 0.88991 |
|    |         |    |         | 57  | 0.89908 |
|    |         |    |         | 58  | 0.90826 |
|    |         |    |         | 59  | 0.91743 |
|    |         |    |         | 60  | 0.92661 |
|    |         |    |         | 82  | 0.93578 |
|    |         |    |         | 83  | 0.94495 |
|    |         |    |         | 87  | 0.95413 |
|    |         |    |         | 91  | 0.9633  |
|    |         |    |         | 92  | 0.97248 |
|    |         |    |         | 101 | 0.98165 |
|    |         |    |         | 102 | 0.99083 |
|    |         |    |         | 103 | 1       |

**Table S102.** Guney station Kaplan-Meier survival estimates according to SPEI-3

| Kaplan-Meier Wet to Dry (SPEI3) |        |         |          |         |              |              |
|---------------------------------|--------|---------|----------|---------|--------------|--------------|
|                                 |        | n       | events   | median  | 0.95LCL      | 0.95UCL      |
|                                 |        | 88      | 88       | 8.5     | 7            | 10           |
| time                            | n.risk | n.event | survival | std.err | lower 95% CI | upper 95% CI |
| 1                               | 88     | 3       | 0.9659   | 0.0193  | 0.92873      | 10.000       |
| 2                               | 85     | 2       | 0.9432   | 0.0247  | 0.89603      | 0.9928       |
| 3                               | 83     | 5       | 0.8864   | 0.0338  | 0.82247      | 0.9552       |
| 4                               | 78     | 5       | 0.8295   | 0.0401  | 0.75459      | 0.912        |
| 5                               | 73     | 6       | 0.7614   | 0.0454  | 0.67732      | 0.8558       |
| 6                               | 67     | 5       | 0.7045   | 0.0486  | 0.61539      | 0.8066       |
| 7                               | 62     | 10      | 0.5909   | 0.0524  | 0.49662      | 0.7031       |
| 8                               | 52     | 8       | 0.5      | 0.0533  | 0.40572      | 0.6162       |
| 9                               | 44     | 10      | 0.3864   | 0.0519  | 0.29692      | 0.5027       |
| 10                              | 34     | 6       | 0.3182   | 0.0497  | 0.23434      | 0.432        |
| 11                              | 28     | 4       | 0.2727   | 0.0475  | 0.19389      | 0.3836       |
| 12                              | 24     | 2       | 0.25     | 0.0462  | 0.17409      | 0.359        |
| 13                              | 22     | 4       | 0.2045   | 0.043   | 0.13547      | 0.3088       |
| 14                              | 18     | 4       | 0.1591   | 0.039   | 0.09841      | 0.2572       |
| 15                              | 14     | 1       | 0.1477   | 0.0378  | 0.08944      | 0.244        |
| 16                              | 13     | 2       | 0.125    | 0.0353  | 0.07192      | 0.2173       |
| 18                              | 11     | 1       | 0.1136   | 0.0338  | 0.0634       | 0.2037       |
| 19                              | 10     | 1       | 0.1023   | 0.0323  | 0.05507      | 0.1899       |
| 20                              | 9      | 2       | 0.0795   | 0.0288  | 0.03908      | 0.1619       |
| 21                              | 7      | 2       | 0.0568   | 0.0247  | 0.02425      | 0.1331       |
| 22                              | 5      | 3       | 0.0227   | 0.0159  | 0.00577      | 0.0894       |
| 31                              | 2      | 1       | 0.0114   | 0.0113  | 0.00162      | 0.0798       |
| 48                              | 1      | 1       | 0        | NaN     | NA           | NA           |

**Table S103.** Guney station Kaplan-Meier survival estimates according to SPEI-6

| Kaplan-Meier Wet to Dry (SPEI6) |        |         |          |         |              |              |
|---------------------------------|--------|---------|----------|---------|--------------|--------------|
|                                 |        | n       | events   | median  | 0.95LCL      | 0.95UCL      |
|                                 |        | 87      | 87       | 11      | 10           | 12           |
| time                            | n.risk | n.event | survival | std.err | lower 95% CI | upper 95% CI |
| 1                               | 87     | 5       | 0.9425   | 0.025   | 0.89487      | 0.9927       |
| 2                               | 82     | 4       | 0.8966   | 0.0327  | 0.83479      | 0.9629       |
| 3                               | 78     | 3       | 0.8621   | 0.037   | 0.79257      | 0.9377       |
| 4                               | 75     | 3       | 0.8276   | 0.0405  | 0.7519       | 0.9109       |
| 5                               | 72     | 2       | 0.8046   | 0.0425  | 0.72545      | 0.8924       |
| 6                               | 70     | 3       | 0.7701   | 0.0451  | 0.68659      | 0.8638       |

|    |    |   |        |        |         |        |
|----|----|---|--------|--------|---------|--------|
| 7  | 67 | 3 | 0.7356 | 0.0473 | 0.64856 | 0.8344 |
| 8  | 64 | 6 | 0.6667 | 0.0505 | 0.57462 | 0.7735 |
| 9  | 58 | 6 | 0.5977 | 0.0526 | 0.50305 | 0.7102 |
| 10 | 52 | 8 | 0.5057 | 0.0536 | 0.41088 | 0.6225 |
| 11 | 44 | 7 | 0.4253 | 0.053  | 0.33312 | 0.543  |
| 12 | 37 | 4 | 0.3793 | 0.052  | 0.28991 | 0.4963 |
| 13 | 33 | 3 | 0.3448 | 0.051  | 0.25811 | 0.4607 |
| 14 | 30 | 2 | 0.3218 | 0.0501 | 0.23723 | 0.4366 |
| 15 | 28 | 3 | 0.2874 | 0.0485 | 0.2064  | 0.4001 |
| 16 | 25 | 2 | 0.2644 | 0.0473 | 0.1862  | 0.3754 |
| 17 | 23 | 4 | 0.2184 | 0.0443 | 0.14675 | 0.325  |
| 18 | 19 | 3 | 0.1839 | 0.0415 | 0.11813 | 0.2863 |
| 19 | 16 | 2 | 0.1609 | 0.0394 | 0.09959 | 0.26   |
| 20 | 14 | 1 | 0.1494 | 0.0382 | 0.09051 | 0.2467 |
| 21 | 13 | 2 | 0.1264 | 0.0356 | 0.07278 | 0.2197 |
| 22 | 11 | 3 | 0.092  | 0.031  | 0.04751 | 0.178  |
| 23 | 8  | 3 | 0.0575 | 0.025  | 0.02454 | 0.1346 |
| 24 | 5  | 1 | 0.046  | 0.0225 | 0.01765 | 0.1197 |
| 26 | 4  | 1 | 0.0345 | 0.0196 | 0.01134 | 0.1048 |
| 27 | 3  | 1 | 0.023  | 0.0161 | 0.00584 | 0.0905 |
| 28 | 2  | 1 | 0.0115 | 0.0114 | 0.00164 | 0.0807 |
| 75 | 1  | 1 | 0      | NaN    | NA      | NA     |

**Table S104.** Guney station Kaplan-Meier survival estimates according to SPEI-12

| Kaplan-Meier Wet to Dry (SPEI12) |        |         |          |         |              |              |
|----------------------------------|--------|---------|----------|---------|--------------|--------------|
|                                  |        | n       | events   | median  | 0.95LCL      | 0.95UCL      |
|                                  |        | 57      | 57       | 32      | 25           | 37           |
| time                             | n.risk | n.event | survival | std.err | lower 95% CI | upper 95% CI |
| 1                                | 57     | 2       | 0.9649   | 0.0244  | 0.91831      | 1.000        |
| 2                                | 55     | 1       | 0.9474   | 0.0296  | 0.89114      | 1.000        |
| 9                                | 54     | 1       | 0.9298   | 0.0338  | 0.86582      | 0.999        |
| 10                               | 53     | 1       | 0.9123   | 0.0375  | 0.84172      | 0.989        |
| 11                               | 52     | 1       | 0.8947   | 0.0406  | 0.81851      | 0.978        |
| 12                               | 51     | 2       | 0.8596   | 0.046   | 0.77404      | 0.955        |
| 13                               | 49     | 2       | 0.8246   | 0.0504  | 0.73151      | 0.929        |
| 14                               | 47     | 3       | 0.7719   | 0.0556  | 0.67034      | 0.889        |
| 15                               | 44     | 3       | 0.7193   | 0.0595  | 0.61162      | 0.846        |
| 16                               | 41     | 2       | 0.6842   | 0.0616  | 0.57358      | 0.816        |
| 17                               | 39     | 1       | 0.6667   | 0.0624  | 0.55486      | 0.801        |
| 18                               | 38     | 1       | 0.6491   | 0.0632  | 0.53633      | 0.786        |
| 19                               | 37     | 1       | 0.6316   | 0.0639  | 0.51799      | 0.77         |
| 25                               | 36     | 1       | 0.614    | 0.0645  | 0.49981      | 0.754        |
| 26                               | 35     | 1       | 0.5965   | 0.065   | 0.48181      | 0.738        |

|     |    |   |        |        |         |       |
|-----|----|---|--------|--------|---------|-------|
| 27  | 34 | 1 | 0.5789 | 0.0654 | 0.46397 | 0.722 |
| 28  | 33 | 1 | 0.5614 | 0.0657 | 0.4463  | 0.706 |
| 29  | 32 | 1 | 0.5439 | 0.066  | 0.42878 | 0.69  |
| 30  | 31 | 1 | 0.5263 | 0.0661 | 0.41142 | 0.673 |
| 31  | 30 | 1 | 0.5088 | 0.0662 | 0.39422 | 0.657 |
| 32  | 29 | 1 | 0.4912 | 0.0662 | 0.37718 | 0.64  |
| 33  | 28 | 1 | 0.4737 | 0.0661 | 0.36028 | 0.623 |
| 34  | 27 | 1 | 0.4561 | 0.066  | 0.34355 | 0.606 |
| 35  | 26 | 1 | 0.4386 | 0.0657 | 0.32697 | 0.588 |
| 36  | 25 | 3 | 0.386  | 0.0645 | 0.27819 | 0.535 |
| 37  | 22 | 3 | 0.3333 | 0.0624 | 0.23091 | 0.481 |
| 38  | 19 | 3 | 0.2807 | 0.0595 | 0.18525 | 0.425 |
| 39  | 16 | 2 | 0.2456 | 0.057  | 0.15583 | 0.387 |
| 40  | 14 | 1 | 0.2281 | 0.0556 | 0.14146 | 0.368 |
| 41  | 13 | 1 | 0.2105 | 0.054  | 0.12734 | 0.348 |
| 42  | 12 | 1 | 0.193  | 0.0523 | 0.11349 | 0.328 |
| 43  | 11 | 1 | 0.1754 | 0.0504 | 0.09993 | 0.308 |
| 44  | 10 | 2 | 0.1404 | 0.046  | 0.07382 | 0.267 |
| 45  | 8  | 1 | 0.1228 | 0.0435 | 0.06136 | 0.246 |
| 46  | 7  | 1 | 0.1053 | 0.0406 | 0.04938 | 0.224 |
| 47  | 6  | 1 | 0.0877 | 0.0375 | 0.03798 | 0.203 |
| 48  | 5  | 1 | 0.0702 | 0.0338 | 0.02728 | 0.181 |
| 56  | 4  | 1 | 0.0526 | 0.0296 | 0.01749 | 0.158 |
| 106 | 3  | 1 | 0.0351 | 0.0244 | 0.00899 | 0.137 |
| 107 | 2  | 1 | 0.0175 | 0.0174 | 0.00251 | 0.122 |
| 120 | 1  | 1 | 0      | NaN    | NA      | NA    |

**Table S105.** Guney station Kaplan-Meier drought risk estimates according to SPEI-3, 6, and 12

| Drought Risk (SPEI3) |              | Drought Risk (SPEI6) |              | Drought Risk (SPEI12) |              |
|----------------------|--------------|----------------------|--------------|-----------------------|--------------|
| Time                 | Drought Risk | Time                 | Drought Risk | Time                  | Drought Risk |
| 1                    | 0.0341       | 1                    | 0.0575       | 1                     | 0.0351       |
| 2                    | 0.0568       | 2                    | 0.1034       | 2                     | 0.0526       |
| 3                    | 0.1136       | 3                    | 0.1379       | 9                     | 0.0702       |
| 4                    | 0.1705       | 4                    | 0.1724       | 10                    | 0.0877       |
| 5                    | 0.2386       | 5                    | 0.1954       | 11                    | 0.1053       |
| 6                    | 0.2955       | 6                    | 0.2299       | 12                    | 0.1404       |
| 7                    | 0.4091       | 7                    | 0.2644       | 13                    | 0.1754       |
| 8                    | 0.5          | 8                    | 0.3333       | 14                    | 0.2281       |
| 9                    | 0.6136       | 9                    | 0.4023       | 15                    | 0.2807       |
| 10                   | 0.6818       | 10                   | 0.4943       | 16                    | 0.3158       |
| 11                   | 0.7273       | 11                   | 0.5747       | 17                    | 0.3333       |
| 12                   | 0.75         | 12                   | 0.6207       | 18                    | 0.3509       |
| 13                   | 0.7955       | 13                   | 0.6552       | 19                    | 0.3684       |
| 14                   | 0.8409       | 14                   | 0.6782       | 25                    | 0.386        |

|    |        |    |        |     |        |
|----|--------|----|--------|-----|--------|
| 15 | 0.8523 | 15 | 0.7126 | 26  | 0.4035 |
| 16 | 0.875  | 16 | 0.7356 | 27  | 0.4211 |
| 18 | 0.8864 | 17 | 0.7816 | 28  | 0.4386 |
| 19 | 0.8977 | 18 | 0.8161 | 29  | 0.4561 |
| 20 | 0.9205 | 19 | 0.8391 | 30  | 0.4737 |
| 21 | 0.9432 | 20 | 0.8506 | 31  | 0.4912 |
| 22 | 0.9773 | 21 | 0.8736 | 32  | 0.5088 |
| 31 | 0.9886 | 22 | 0.908  | 33  | 0.5263 |
| 48 | 1      | 23 | 0.9425 | 34  | 0.5439 |
|    |        | 24 | 0.954  | 35  | 0.5614 |
|    |        | 26 | 0.9655 | 36  | 0.614  |
|    |        | 27 | 0.977  | 37  | 0.6667 |
|    |        | 28 | 0.9885 | 38  | 0.7193 |
|    |        | 75 | 1      | 39  | 0.7544 |
|    |        |    |        | 40  | 0.7719 |
|    |        |    |        | 41  | 0.7895 |
|    |        |    |        | 42  | 0.807  |
|    |        |    |        | 43  | 0.8246 |
|    |        |    |        | 44  | 0.8596 |
|    |        |    |        | 45  | 0.8772 |
|    |        |    |        | 46  | 0.8947 |
|    |        |    |        | 47  | 0.9123 |
|    |        |    |        | 48  | 0.9298 |
|    |        |    |        | 56  | 0.9474 |
|    |        |    |        | 106 | 0.9649 |
|    |        |    |        | 107 | 0.9825 |
|    |        |    |        | 120 | 1      |

**Table S106.** Kinik station Kaplan-Meier survival estimates according to SPI-3

| Kaplan-Meier Wet to Dry (SPI3) |        |         |          |         |              |              |
|--------------------------------|--------|---------|----------|---------|--------------|--------------|
|                                |        | n       | events   | median  | 0.95LCL      | 0.95UCL      |
|                                |        | 62      | 62       | 6       | 5            | 9            |
| time                           | n.risk | n.event | survival | std.err | lower 95% CL | upper 95% CL |
| 1                              | 62     | 4       | 0.9355   | 0.0312  | 0.87629      | 0.999        |
| 2                              | 58     | 3       | 0.8871   | 0.0402  | 0.81172      | 0.969        |
| 3                              | 55     | 7       | 0.7742   | 0.0531  | 0.67681      | 0.886        |
| 4                              | 48     | 6       | 0.6774   | 0.0594  | 0.57051      | 0.804        |
| 5                              | 42     | 9       | 0.5323   | 0.0634  | 0.42149      | 0.672        |
| 6                              | 33     | 3       | 0.4839   | 0.0635  | 0.37418      | 0.626        |
| 7                              | 30     | 3       | 0.4355   | 0.063   | 0.32801      | 0.578        |
| 8                              | 27     | 4       | 0.371    | 0.0613  | 0.26827      | 0.513        |
| 9                              | 23     | 3       | 0.3226   | 0.0594  | 0.2249       | 0.463        |
| 10                             | 20     | 3       | 0.2742   | 0.0567  | 0.18288      | 0.411        |

|    |    |   |        |        |         |       |
|----|----|---|--------|--------|---------|-------|
| 11 | 17 | 2 | 0.2419 | 0.0544 | 0.15572 | 0.376 |
| 12 | 15 | 1 | 0.2258 | 0.0531 | 0.14242 | 0.358 |
| 13 | 14 | 3 | 0.1774 | 0.0485 | 0.10381 | 0.303 |
| 14 | 11 | 1 | 0.1613 | 0.0467 | 0.09143 | 0.285 |
| 16 | 10 | 1 | 0.1452 | 0.0447 | 0.07934 | 0.266 |
| 18 | 9  | 1 | 0.129  | 0.0426 | 0.06758 | 0.246 |
| 21 | 8  | 1 | 0.1129 | 0.0402 | 0.05619 | 0.227 |
| 22 | 7  | 1 | 0.0968 | 0.0375 | 0.04524 | 0.207 |
| 23 | 6  | 1 | 0.0806 | 0.0346 | 0.0348  | 0.187 |
| 24 | 5  | 1 | 0.0645 | 0.0312 | 0.025   | 0.166 |
| 25 | 4  | 1 | 0.0484 | 0.0273 | 0.01604 | 0.146 |
| 27 | 3  | 1 | 0.0323 | 0.0224 | 0.00825 | 0.126 |
| 34 | 2  | 1 | 0.0161 | 0.016  | 0.00231 | 0.113 |
| 35 | 1  | 1 | 0      | NaN    | NA      | NA    |

**Table S107.** Kinik station Kaplan-Meier survival estimates according to SPI-6

| Kaplan-Meier Wet to Dry (SPI6) |        |         |          |         |              |              |
|--------------------------------|--------|---------|----------|---------|--------------|--------------|
|                                |        | n       | events   | median  | 0.95LCL      | 0.95UCL      |
|                                |        | 70      | 70       | 12      | 10           | 15           |
| time                           | n.risk | n.event | survival | std.err | lower 95% CL | upper 95% CL |
| 1                              | 70     | 5       | 0.9286   | 0.0308  | 0.87016      | 0.991        |
| 2                              | 65     | 6       | 0.8429   | 0.0435  | 0.76177      | 0.933        |
| 3                              | 59     | 3       | 0.8      | 0.0478  | 0.71158      | 0.899        |
| 4                              | 56     | 3       | 0.7571   | 0.0513  | 0.66307      | 0.865        |
| 5                              | 53     | 1       | 0.7429   | 0.0522  | 0.64721      | 0.853        |
| 6                              | 52     | 2       | 0.7143   | 0.054   | 0.61592      | 0.828        |
| 7                              | 50     | 2       | 0.6857   | 0.0555  | 0.58515      | 0.804        |
| 8                              | 48     | 2       | 0.6571   | 0.0567  | 0.55485      | 0.778        |
| 9                              | 46     | 3       | 0.6143   | 0.0582  | 0.51021      | 0.74         |
| 10                             | 43     | 3       | 0.5714   | 0.0591  | 0.4665       | 0.7          |
| 11                             | 40     | 3       | 0.5286   | 0.0597  | 0.42366      | 0.659        |
| 12                             | 37     | 4       | 0.4714   | 0.0597  | 0.36786      | 0.604        |
| 13                             | 33     | 3       | 0.4286   | 0.0591  | 0.327        | 0.562        |
| 14                             | 30     | 3       | 0.3857   | 0.0582  | 0.287        | 0.518        |
| 15                             | 27     | 2       | 0.3571   | 0.0573  | 0.26082      | 0.489        |
| 16                             | 25     | 1       | 0.3429   | 0.0567  | 0.24789      | 0.474        |
| 17                             | 24     | 2       | 0.3143   | 0.0555  | 0.22236      | 0.444        |
| 18                             | 22     | 2       | 0.2857   | 0.054   | 0.19727      | 0.414        |
| 19                             | 20     | 3       | 0.2429   | 0.0513  | 0.16059      | 0.367        |
| 20                             | 17     | 2       | 0.2143   | 0.049   | 0.13683      | 0.336        |
| 21                             | 15     | 2       | 0.1857   | 0.0465  | 0.11371      | 0.303        |
| 22                             | 13     | 2       | 0.1571   | 0.0435  | 0.09134      | 0.27         |
| 23                             | 11     | 3       | 0.1143   | 0.038   | 0.05953      | 0.219        |

|    |   |   |        |        |         |       |
|----|---|---|--------|--------|---------|-------|
| 24 | 8 | 2 | 0.0857 | 0.0335 | 0.03988 | 0.184 |
| 25 | 6 | 1 | 0.0714 | 0.0308 | 0.03069 | 0.166 |
| 26 | 5 | 1 | 0.0571 | 0.0277 | 0.02206 | 0.148 |
| 27 | 4 | 1 | 0.0429 | 0.0242 | 0.01417 | 0.13  |
| 37 | 3 | 2 | 0.0143 | 0.0142 | 0.00204 | 0.1   |
| 38 | 1 | 1 | 0      | NaN    | NA      | NA    |

**Table S108.** Kinik station Kaplan-Meier survival estimates according to SPI-12

| Kaplan-Meier Wet to Dry (SPI12) |        |         |          |         |              |              |
|---------------------------------|--------|---------|----------|---------|--------------|--------------|
|                                 |        | n       | events   | median  | 0.95LCL      | 0.95UCL      |
|                                 |        | 60      | 60       | 15.5    | 13           | 20           |
| time                            | n.risk | n.event | survival | std.err | lower 95% CL | upper 95% CL |
| 1                               | 60     | 1       | 0.9833   | 0.0165  | 0.95147      | 1            |
| 2                               | 59     | 2       | 0.95     | 0.0281  | 0.89642      | 1            |
| 3                               | 57     | 2       | 0.9167   | 0.0357  | 0.84933      | 0.989        |
| 4                               | 55     | 1       | 0.9      | 0.0387  | 0.8272       | 0.979        |
| 5                               | 54     | 2       | 0.8667   | 0.0439  | 0.78478      | 0.957        |
| 6                               | 52     | 1       | 0.85     | 0.0461  | 0.76429      | 0.945        |
| 7                               | 51     | 2       | 0.8167   | 0.05    | 0.7244       | 0.921        |
| 8                               | 49     | 2       | 0.7833   | 0.0532  | 0.68573      | 0.895        |
| 9                               | 47     | 2       | 0.75     | 0.0559  | 0.64806      | 0.868        |
| 10                              | 45     | 2       | 0.7167   | 0.0582  | 0.61125      | 0.84         |
| 11                              | 43     | 2       | 0.6833   | 0.0601  | 0.57521      | 0.812        |
| 12                              | 41     | 4       | 0.6167   | 0.0628  | 0.50514      | 0.753        |
| 13                              | 37     | 3       | 0.5667   | 0.064   | 0.45418      | 0.707        |
| 14                              | 34     | 2       | 0.5333   | 0.0644  | 0.42093      | 0.676        |
| 15                              | 32     | 2       | 0.5      | 0.0645  | 0.38822      | 0.644        |
| 16                              | 30     | 2       | 0.4667   | 0.0644  | 0.35607      | 0.612        |
| 17                              | 28     | 2       | 0.4333   | 0.064   | 0.32446      | 0.579        |
| 18                              | 26     | 2       | 0.4      | 0.0632  | 0.29341      | 0.545        |
| 19                              | 24     | 2       | 0.3667   | 0.0622  | 0.26293      | 0.511        |
| 20                              | 22     | 2       | 0.3333   | 0.0609  | 0.23306      | 0.477        |
| 21                              | 20     | 1       | 0.3167   | 0.0601  | 0.21836      | 0.459        |
| 22                              | 19     | 1       | 0.3      | 0.0592  | 0.20383      | 0.442        |
| 36                              | 18     | 1       | 0.2833   | 0.0582  | 0.18946      | 0.424        |
| 38                              | 17     | 1       | 0.2667   | 0.0571  | 0.17528      | 0.406        |
| 39                              | 16     | 1       | 0.25     | 0.0559  | 0.16129      | 0.388        |
| 40                              | 15     | 1       | 0.2333   | 0.0546  | 0.1475       | 0.369        |
| 41                              | 14     | 1       | 0.2167   | 0.0532  | 0.13392      | 0.351        |
| 42                              | 13     | 1       | 0.2      | 0.0516  | 0.12057      | 0.332        |
| 43                              | 12     | 1       | 0.1833   | 0.05    | 0.10748      | 0.313        |
| 44                              | 11     | 1       | 0.1667   | 0.0481  | 0.09465      | 0.293        |
| 50                              | 10     | 1       | 0.15     | 0.0461  | 0.08213      | 0.274        |
| 155                             | 9      | 1       | 0.1333   | 0.0439  | 0.06995      | 0.254        |

|     |   |   |        |        |         |       |
|-----|---|---|--------|--------|---------|-------|
| 156 | 8 | 1 | 0.1167 | 0.0414 | 0.05815 | 0.234 |
| 157 | 7 | 1 | 0.1    | 0.0387 | 0.04681 | 0.214 |
| 158 | 6 | 1 | 0.0833 | 0.0357 | 0.036   | 0.193 |
| 159 | 5 | 1 | 0.0667 | 0.0322 | 0.02587 | 0.172 |
| 160 | 4 | 1 | 0.05   | 0.0281 | 0.01659 | 0.151 |
| 161 | 3 | 1 | 0.0333 | 0.0232 | 0.00853 | 0.13  |
| 162 | 2 | 1 | 0.0167 | 0.0165 | 0.00239 | 0.116 |
| 163 | 1 | 1 | 0      | NaN    | NA      | NA    |

**Table S109.** Kinik station Kaplan-Meier drought risk estimates according to SPI-3, 6, and 12

| Drought Risk (SPI3) |              | Drought Risk (SPI6) |              | Drought Risk (SPI12) |              |
|---------------------|--------------|---------------------|--------------|----------------------|--------------|
| Time                | Drought Risk | Time                | Drought Risk | Time                 | Drought Risk |
| 1                   | 0.0645       | 1                   | 0.0714       | 1                    | 0.0167       |
| 2                   | 0.1129       | 2                   | 0.1571       | 2                    | 0.05         |
| 3                   | 0.2258       | 3                   | 0.2          | 3                    | 0.0833       |
| 4                   | 0.3226       | 4                   | 0.2429       | 4                    | 0.1          |
| 5                   | 0.4677       | 5                   | 0.2571       | 5                    | 0.1333       |
| 6                   | 0.5161       | 6                   | 0.2857       | 6                    | 0.15         |
| 7                   | 0.5645       | 7                   | 0.3143       | 7                    | 0.1833       |
| 8                   | 0.629        | 8                   | 0.3429       | 8                    | 0.2167       |
| 9                   | 0.6774       | 9                   | 0.3857       | 9                    | 0.25         |
| 10                  | 0.7258       | 10                  | 0.4286       | 10                   | 0.2833       |
| 11                  | 0.7581       | 11                  | 0.4714       | 11                   | 0.3167       |
| 12                  | 0.7742       | 12                  | 0.5286       | 12                   | 0.3833       |
| 13                  | 0.8226       | 13                  | 0.5714       | 13                   | 0.4333       |
| 14                  | 0.8387       | 14                  | 0.6143       | 14                   | 0.4667       |
| 16                  | 0.8548       | 15                  | 0.6429       | 15                   | 0.5          |
| 18                  | 0.871        | 16                  | 0.6571       | 16                   | 0.5333       |
| 21                  | 0.8871       | 17                  | 0.6857       | 17                   | 0.5667       |
| 22                  | 0.9032       | 18                  | 0.7143       | 18                   | 0.6          |
| 23                  | 0.9194       | 19                  | 0.7571       | 19                   | 0.6333       |
| 24                  | 0.9355       | 20                  | 0.7857       | 20                   | 0.6667       |
| 25                  | 0.9516       | 21                  | 0.8143       | 21                   | 0.6833       |
| 27                  | 0.9677       | 22                  | 0.8429       | 22                   | 0.7          |
| 34                  | 0.9839       | 23                  | 0.8857       | 36                   | 0.7167       |
| 35                  | 1            | 24                  | 0.9143       | 38                   | 0.7333       |
|                     |              | 25                  | 0.9286       | 39                   | 0.75         |
|                     |              | 26                  | 0.9429       | 40                   | 0.7667       |
|                     |              | 27                  | 0.9571       | 41                   | 0.7833       |
|                     |              | 37                  | 0.9857       | 42                   | 0.8          |
|                     |              | 38                  | 1            | 43                   | 0.8167       |
|                     |              |                     |              | 44                   | 0.8333       |
|                     |              |                     |              | 50                   | 0.85         |
|                     |              |                     |              | 155                  | 0.8667       |
|                     |              |                     |              | 156                  | 0.8833       |



|     |        |
|-----|--------|
| 157 | 0.9    |
| 158 | 0.9167 |
| 159 | 0.9333 |
| 160 | 0.95   |
| 161 | 0.9667 |
| 162 | 0.9833 |
| 163 | 1      |

**Table S110.** Kinik station Kaplan-Meier survival estimates according to SPEI-3

| Kaplan-Meier Wet to Dry (SPEI3) |        |         |          |         |              |              |
|---------------------------------|--------|---------|----------|---------|--------------|--------------|
|                                 |        | n       | events   | median  | 0.95LCL      | 0.95UCL      |
|                                 |        | 75      | 75       | 5       | 4            | 9            |
| time                            | n.risk | n.event | survival | std.err | lower 95% CI | upper 95% CI |
| 1                               | 75     | 3       | 0.96     | 0.0226  | 0.91666      | 10.000       |
| 2                               | 72     | 7       | 0.8667   | 0.0393  | 0.79305      | 0.9471       |
| 3                               | 65     | 11      | 0.72     | 0.0518  | 0.62523      | 0.8291       |
| 4                               | 54     | 11      | 0.5733   | 0.0571  | 0.47165      | 0.6969       |
| 5                               | 43     | 8       | 0.4667   | 0.0576  | 0.36638      | 0.5944       |
| 6                               | 35     | 2       | 0.44     | 0.0573  | 0.34085      | 0.568        |
| 7                               | 33     | 2       | 0.4133   | 0.0569  | 0.31565      | 0.5412       |
| 8                               | 31     | 3       | 0.3733   | 0.0559  | 0.27845      | 0.5005       |
| 9                               | 28     | 3       | 0.3333   | 0.0544  | 0.24203      | 0.4591       |
| 10                              | 25     | 5       | 0.2667   | 0.0511  | 0.18322      | 0.3881       |
| 11                              | 20     | 5       | 0.2      | 0.0462  | 0.12719      | 0.3145       |
| 12                              | 15     | 3       | 0.16     | 0.0423  | 0.09526      | 0.2687       |
| 14                              | 12     | 1       | 0.1467   | 0.0409  | 0.08497      | 0.2532       |
| 15                              | 11     | 1       | 0.1333   | 0.0393  | 0.07488      | 0.2374       |
| 16                              | 10     | 1       | 0.12     | 0.0375  | 0.06502      | 0.2215       |
| 18                              | 9      | 2       | 0.0933   | 0.0336  | 0.0461       | 0.189        |
| 19                              | 7      | 1       | 0.08     | 0.0313  | 0.03713      | 0.1723       |
| 24                              | 6      | 1       | 0.0667   | 0.0288  | 0.02859      | 0.1555       |
| 27                              | 5      | 1       | 0.0533   | 0.0259  | 0.02055      | 0.1384       |
| 29                              | 4      | 1       | 0.04     | 0.0226  | 0.0132       | 0.1212       |
| 37                              | 3      | 1       | 0.0267   | 0.0186  | 0.00679      | 0.1047       |
| 38                              | 2      | 1       | 0.0133   | 0.0132  | 0.0019       | 0.0934       |
| 39                              | 1      | 1       | 0        | NaN     | NA           | NA           |

**Table S111.** Kinik station Kaplan-Meier survival estimates according to SPEI-6

| Kaplan-Meier Wet to Dry (SPEI6) |  |    |        |        |         |         |
|---------------------------------|--|----|--------|--------|---------|---------|
|                                 |  | n  | events | median | 0.95LCL | 0.95UCL |
|                                 |  | 71 | 71     | 14     | 12      | 18      |

| time | n.risk | n.event | survival | std.err | lower 95% CI | upper 95% CI |
|------|--------|---------|----------|---------|--------------|--------------|
| 1    | 71     | 4       | 0.9437   | 0.0274  | 0.89153      | 0.9988       |
| 2    | 67     | 3       | 0.9014   | 0.0354  | 0.83467      | 0.9735       |
| 3    | 64     | 3       | 0.8592   | 0.0413  | 0.78193      | 0.944        |
| 4    | 61     | 4       | 0.8028   | 0.0472  | 0.71541      | 0.9009       |
| 6    | 57     | 1       | 0.7887   | 0.0484  | 0.69927      | 0.8896       |
| 7    | 56     | 1       | 0.7746   | 0.0496  | 0.68331      | 0.8782       |
| 8    | 55     | 1       | 0.7606   | 0.0506  | 0.66751      | 0.8666       |
| 9    | 54     | 3       | 0.7183   | 0.0534  | 0.62094      | 0.8309       |
| 10   | 51     | 4       | 0.662    | 0.0561  | 0.5606       | 0.7817       |
| 11   | 47     | 3       | 0.6197   | 0.0576  | 0.51649      | 0.7436       |
| 12   | 44     | 3       | 0.5775   | 0.0586  | 0.47328      | 0.7046       |
| 13   | 41     | 3       | 0.5352   | 0.0592  | 0.43091      | 0.6648       |
| 14   | 38     | 3       | 0.493    | 0.0593  | 0.38937      | 0.6241       |
| 15   | 35     | 3       | 0.4507   | 0.059   | 0.34863      | 0.5827       |
| 16   | 32     | 2       | 0.4225   | 0.0586  | 0.32193      | 0.5546       |
| 17   | 30     | 3       | 0.3803   | 0.0576  | 0.28258      | 0.5118       |
| 18   | 27     | 3       | 0.338    | 0.0561  | 0.24411      | 0.4681       |
| 19   | 24     | 3       | 0.2958   | 0.0542  | 0.20658      | 0.4235       |
| 20   | 21     | 3       | 0.2535   | 0.0516  | 0.17009      | 0.3779       |
| 21   | 18     | 2       | 0.2254   | 0.0496  | 0.14641      | 0.3469       |
| 22   | 16     | 1       | 0.2113   | 0.0484  | 0.13479      | 0.3311       |
| 23   | 15     | 1       | 0.1972   | 0.0472  | 0.12332      | 0.3153       |
| 24   | 14     | 1       | 0.1831   | 0.0459  | 0.11202      | 0.2993       |
| 27   | 13     | 1       | 0.169    | 0.0445  | 0.10091      | 0.2831       |
| 28   | 12     | 2       | 0.1408   | 0.0413  | 0.07929      | 0.2502       |
| 36   | 10     | 1       | 0.1268   | 0.0395  | 0.06884      | 0.2334       |
| 37   | 9      | 1       | 0.1127   | 0.0375  | 0.05866      | 0.2164       |
| 38   | 8      | 1       | 0.0986   | 0.0354  | 0.0488       | 0.1992       |
| 39   | 7      | 1       | 0.0845   | 0.033   | 0.0393       | 0.1817       |
| 40   | 6      | 1       | 0.0704   | 0.0304  | 0.03025      | 0.164        |
| 41   | 5      | 1       | 0.0563   | 0.0274  | 0.02175      | 0.146        |
| 42   | 4      | 1       | 0.0423   | 0.0239  | 0.01396      | 0.1279       |
| 43   | 3      | 1       | 0.0282   | 0.0196  | 0.00718      | 0.1104       |
| 112  | 2      | 1       | 0.0141   | 0.014   | 0.00201      | 0.0986       |
| 113  | 1      | 1       | 0        | NaN     | NA           | NA           |

**Table S112.** Kinik station Kaplan-Meier survival estimates according to SPEI-12

| Kaplan-Meier Wet to Dry (SPEI12) |        |         |          |         |              |              |
|----------------------------------|--------|---------|----------|---------|--------------|--------------|
|                                  |        | n       | events   | median  | 0.95LCL      | 0.95UCL      |
|                                  |        | 66      | 66       | 17      | 13           | 23           |
| time                             | n.risk | n.event | survival | std.err | lower 95% CI | upper 95% CI |

|     |    |   |        |        |         |       |
|-----|----|---|--------|--------|---------|-------|
| 1   | 66 | 1 | 0.9848 | 0.015  | 0.95581 | 1.000 |
| 2   | 65 | 2 | 0.9545 | 0.0256 | 0.90559 | 1.000 |
| 3   | 63 | 2 | 0.9242 | 0.0326 | 0.86256 | 0.99  |
| 4   | 61 | 1 | 0.9091 | 0.0354 | 0.84231 | 0.981 |
| 5   | 60 | 2 | 0.8788 | 0.0402 | 0.80347 | 0.961 |
| 6   | 58 | 1 | 0.8636 | 0.0422 | 0.78469 | 0.951 |
| 7   | 57 | 2 | 0.8333 | 0.0459 | 0.7481  | 0.928 |
| 8   | 55 | 2 | 0.803  | 0.049  | 0.71259 | 0.905 |
| 9   | 53 | 2 | 0.7727 | 0.0516 | 0.67796 | 0.881 |
| 10  | 51 | 3 | 0.7273 | 0.0548 | 0.62739 | 0.843 |
| 11  | 48 | 3 | 0.6818 | 0.0573 | 0.57822 | 0.804 |
| 12  | 45 | 3 | 0.6364 | 0.0592 | 0.53028 | 0.764 |
| 13  | 42 | 2 | 0.6061 | 0.0601 | 0.49893 | 0.736 |
| 14  | 40 | 2 | 0.5758 | 0.0608 | 0.46806 | 0.708 |
| 15  | 38 | 2 | 0.5455 | 0.0613 | 0.43763 | 0.68  |
| 16  | 36 | 2 | 0.5152 | 0.0615 | 0.40765 | 0.651 |
| 17  | 34 | 2 | 0.4848 | 0.0615 | 0.3781  | 0.622 |
| 18  | 32 | 2 | 0.4545 | 0.0613 | 0.34898 | 0.592 |
| 19  | 30 | 2 | 0.4242 | 0.0608 | 0.3203  | 0.562 |
| 20  | 28 | 2 | 0.3939 | 0.0601 | 0.29206 | 0.531 |
| 21  | 26 | 1 | 0.3788 | 0.0597 | 0.27811 | 0.516 |
| 22  | 25 | 1 | 0.3636 | 0.0592 | 0.26428 | 0.5   |
| 23  | 24 | 1 | 0.3485 | 0.0587 | 0.25057 | 0.485 |
| 24  | 23 | 1 | 0.3333 | 0.058  | 0.23698 | 0.469 |
| 37  | 22 | 1 | 0.3182 | 0.0573 | 0.22351 | 0.453 |
| 38  | 21 | 1 | 0.303  | 0.0566 | 0.21018 | 0.437 |
| 39  | 20 | 1 | 0.2879 | 0.0557 | 0.19698 | 0.421 |
| 40  | 19 | 1 | 0.2727 | 0.0548 | 0.18392 | 0.404 |
| 41  | 18 | 1 | 0.2576 | 0.0538 | 0.17101 | 0.388 |
| 42  | 17 | 1 | 0.2424 | 0.0528 | 0.15825 | 0.371 |
| 86  | 16 | 1 | 0.2273 | 0.0516 | 0.14566 | 0.355 |
| 87  | 15 | 1 | 0.2121 | 0.0503 | 0.13325 | 0.338 |
| 88  | 14 | 1 | 0.197  | 0.049  | 0.12102 | 0.321 |
| 89  | 13 | 1 | 0.1818 | 0.0475 | 0.10899 | 0.303 |
| 90  | 12 | 1 | 0.1667 | 0.0459 | 0.09718 | 0.286 |
| 91  | 11 | 1 | 0.1515 | 0.0441 | 0.08561 | 0.268 |
| 92  | 10 | 1 | 0.1364 | 0.0422 | 0.07431 | 0.25  |
| 93  | 9  | 1 | 0.1212 | 0.0402 | 0.0633  | 0.232 |
| 94  | 8  | 1 | 0.1061 | 0.0379 | 0.05265 | 0.214 |
| 95  | 7  | 1 | 0.0909 | 0.0354 | 0.04239 | 0.195 |
| 96  | 6  | 1 | 0.0758 | 0.0326 | 0.03262 | 0.176 |
| 152 | 5  | 1 | 0.0606 | 0.0294 | 0.02344 | 0.157 |
| 153 | 4  | 1 | 0.0455 | 0.0256 | 0.01505 | 0.137 |
| 154 | 3  | 1 | 0.0303 | 0.0211 | 0.00774 | 0.119 |
| 155 | 2  | 1 | 0.0152 | 0.015  | 0.00217 | 0.106 |

|     |   |   |   |     |    |    |
|-----|---|---|---|-----|----|----|
| 156 | 1 | 1 | 0 | NaN | NA | NA |
|-----|---|---|---|-----|----|----|

**Table S113.** Kinik station Kaplan-Meier drought risk estimates according to SPEI-3, 6, and 12

| Drought Risk (SPEI3) |              | Drought Risk (SPEI6) |              | Drought Risk (SPEI12) |              |
|----------------------|--------------|----------------------|--------------|-----------------------|--------------|
| Time                 | Drought Risk | Time                 | Drought Risk | Time                  | Drought Risk |
| 1                    | 0.04         | 1                    | 0.0563       | 1                     | 0.0152       |
| 2                    | 0.1333       | 2                    | 0.0986       | 2                     | 0.0455       |
| 3                    | 0.28         | 3                    | 0.1408       | 3                     | 0.0758       |
| 4                    | 0.4267       | 4                    | 0.1972       | 4                     | 0.0909       |
| 5                    | 0.5333       | 6                    | 0.2113       | 5                     | 0.1212       |
| 6                    | 0.56         | 7                    | 0.2254       | 6                     | 0.1364       |
| 7                    | 0.5867       | 8                    | 0.2394       | 7                     | 0.1667       |
| 8                    | 0.6267       | 9                    | 0.2817       | 8                     | 0.197        |
| 9                    | 0.6667       | 10                   | 0.338        | 9                     | 0.2273       |
| 10                   | 0.7333       | 11                   | 0.3803       | 10                    | 0.2727       |
| 11                   | 0.8          | 12                   | 0.4225       | 11                    | 0.3182       |
| 12                   | 0.84         | 13                   | 0.4648       | 12                    | 0.3636       |
| 14                   | 0.8533       | 14                   | 0.507        | 13                    | 0.3939       |
| 15                   | 0.8667       | 15                   | 0.5493       | 14                    | 0.4242       |
| 16                   | 0.88         | 16                   | 0.5775       | 15                    | 0.4545       |
| 18                   | 0.9067       | 17                   | 0.6197       | 16                    | 0.4848       |
| 19                   | 0.92         | 18                   | 0.662        | 17                    | 0.5152       |
| 24                   | 0.9333       | 19                   | 0.7042       | 18                    | 0.5455       |
| 27                   | 0.9467       | 20                   | 0.7465       | 19                    | 0.5758       |
| 29                   | 0.96         | 21                   | 0.7746       | 20                    | 0.6061       |
| 37                   | 0.9733       | 22                   | 0.7887       | 21                    | 0.6212       |
| 38                   | 0.9867       | 23                   | 0.8028       | 22                    | 0.6364       |
| 39                   | 1            | 24                   | 0.8169       | 23                    | 0.6515       |
|                      |              | 27                   | 0.831        | 24                    | 0.6667       |
|                      |              | 28                   | 0.8592       | 37                    | 0.6818       |
|                      |              | 36                   | 0.8732       | 38                    | 0.697        |
|                      |              | 37                   | 0.8873       | 39                    | 0.7121       |
|                      |              | 38                   | 0.9014       | 40                    | 0.7273       |
|                      |              | 39                   | 0.9155       | 41                    | 0.7424       |
|                      |              | 40                   | 0.9296       | 42                    | 0.7576       |
|                      |              | 41                   | 0.9437       | 86                    | 0.7727       |
|                      |              | 42                   | 0.9577       | 87                    | 0.7879       |
|                      |              | 43                   | 0.9718       | 88                    | 0.803        |
|                      |              | 112                  | 0.9859       | 89                    | 0.8182       |
|                      |              | 113                  | 1            | 90                    | 0.8333       |
|                      |              |                      |              | 91                    | 0.8485       |
|                      |              |                      |              | 92                    | 0.8636       |
|                      |              |                      |              | 93                    | 0.8788       |
|                      |              |                      |              | 94                    | 0.8939       |

|     |        |
|-----|--------|
| 95  | 0.9091 |
| 96  | 0.9242 |
| 152 | 0.9394 |
| 153 | 0.9545 |
| 154 | 0.9697 |
| 155 | 0.9848 |
| 156 | 1      |

**Table S114.** Kiraz station Kaplan-Meier survival estimates according to SPI-3

| Kaplan-Meier Wet to Dry (SPI3) |        |         |          |         |              |              |
|--------------------------------|--------|---------|----------|---------|--------------|--------------|
|                                |        | n       | events   | median  | 0.95LCL      | 0.95UCL      |
|                                |        | 57      | 57       | 7       | 5            | 10           |
| time                           | n.risk | n.event | survival | std.err | lower 95% CL | upper 95% CL |
| 1                              | 57     | 4       | 0.9298   | 0.0338  | 0.86582      | 0.999        |
| 2                              | 53     | 2       | 0.8947   | 0.0406  | 0.81851      | 0.978        |
| 3                              | 51     | 4       | 0.8246   | 0.0504  | 0.73151      | 0.929        |
| 4                              | 47     | 7       | 0.7018   | 0.0606  | 0.5925       | 0.831        |
| 5                              | 40     | 6       | 0.5965   | 0.065   | 0.48181      | 0.738        |
| 6                              | 34     | 4       | 0.5263   | 0.0661  | 0.41142      | 0.673        |
| 7                              | 30     | 3       | 0.4737   | 0.0661  | 0.36028      | 0.623        |
| 8                              | 27     | 2       | 0.4386   | 0.0657  | 0.32697      | 0.588        |
| 9                              | 25     | 3       | 0.386    | 0.0645  | 0.27819      | 0.535        |
| 10                             | 22     | 3       | 0.3333   | 0.0624  | 0.23091      | 0.481        |
| 11                             | 19     | 3       | 0.2807   | 0.0595  | 0.18525      | 0.425        |
| 12                             | 16     | 2       | 0.2456   | 0.057   | 0.15583      | 0.387        |
| 13                             | 14     | 1       | 0.2281   | 0.0556  | 0.14146      | 0.368        |
| 16                             | 13     | 2       | 0.193    | 0.0523  | 0.11349      | 0.328        |
| 17                             | 11     | 2       | 0.1579   | 0.0483  | 0.0867       | 0.288        |
| 18                             | 9      | 3       | 0.1053   | 0.0406  | 0.04938      | 0.224        |
| 19                             | 6      | 1       | 0.0877   | 0.0375  | 0.03798      | 0.203        |
| 28                             | 5      | 1       | 0.0702   | 0.0338  | 0.02728      | 0.181        |
| 29                             | 4      | 1       | 0.0526   | 0.0296  | 0.01749      | 0.158        |
| 37                             | 3      | 1       | 0.0351   | 0.0244  | 0.00899      | 0.137        |
| 48                             | 2      | 1       | 0.0175   | 0.0174  | 0.00251      | 0.122        |
| 49                             | 1      | 1       | 0        | NaN     | NA           | NA           |

**Table S115.** Kiraz station Kaplan-Meier survival estimates according to SPI-6

| Kaplan-Meier Wet to Dry (SPI6) |
|--------------------------------|
|--------------------------------|

|      |        |         |          |         |              |              |
|------|--------|---------|----------|---------|--------------|--------------|
|      |        | n       | events   | median  | 0.95LCL      | 0.95UCL      |
|      |        | 49      | 49       | 12      | 8            | 26           |
| time | n.risk | n.event | survival | std.err | lower 95% CL | upper 95% CL |
| 1    | 49     | 1       | 0.9796   | 0.0202  | 0.94079      | 1            |
| 2    | 48     | 3       | 0.9184   | 0.0391  | 0.84482      | 0.998        |
| 3    | 45     | 3       | 0.8571   | 0.05    | 0.76456      | 0.961        |
| 4    | 42     | 2       | 0.8163   | 0.0553  | 0.7148       | 0.932        |
| 5    | 40     | 2       | 0.7755   | 0.0596  | 0.66706      | 0.902        |
| 6    | 38     | 2       | 0.7347   | 0.0631  | 0.62092      | 0.869        |
| 7    | 36     | 3       | 0.6735   | 0.067   | 0.55417      | 0.818        |
| 8    | 33     | 3       | 0.6122   | 0.0696  | 0.48995      | 0.765        |
| 9    | 30     | 3       | 0.551    | 0.0711  | 0.42796      | 0.709        |
| 11   | 27     | 2       | 0.5102   | 0.0714  | 0.38779      | 0.671        |
| 12   | 25     | 1       | 0.4898   | 0.0714  | 0.36805      | 0.652        |
| 13   | 24     | 1       | 0.4694   | 0.0713  | 0.34853      | 0.632        |
| 14   | 23     | 1       | 0.449    | 0.0711  | 0.32924      | 0.612        |
| 15   | 22     | 1       | 0.4286   | 0.0707  | 0.31018      | 0.592        |
| 16   | 21     | 2       | 0.3878   | 0.0696  | 0.27275      | 0.551        |
| 17   | 19     | 1       | 0.3673   | 0.0689  | 0.25439      | 0.53         |
| 23   | 18     | 1       | 0.3469   | 0.068   | 0.23628      | 0.509        |
| 26   | 17     | 1       | 0.3265   | 0.067   | 0.21842      | 0.488        |
| 27   | 16     | 2       | 0.2857   | 0.0645  | 0.18351      | 0.445        |
| 28   | 14     | 1       | 0.2653   | 0.0631  | 0.16649      | 0.423        |
| 29   | 13     | 1       | 0.2449   | 0.0614  | 0.14978      | 0.4          |
| 30   | 12     | 1       | 0.2245   | 0.0596  | 0.13341      | 0.378        |
| 31   | 11     | 1       | 0.2041   | 0.0576  | 0.1174       | 0.355        |
| 32   | 10     | 1       | 0.1837   | 0.0553  | 0.10179      | 0.331        |
| 33   | 9      | 1       | 0.1633   | 0.0528  | 0.08662      | 0.308        |
| 34   | 8      | 1       | 0.1429   | 0.05    | 0.07195      | 0.284        |
| 37   | 7      | 1       | 0.1224   | 0.0468  | 0.05787      | 0.259        |
| 44   | 6      | 1       | 0.102    | 0.0432  | 0.04447      | 0.234        |
| 45   | 5      | 1       | 0.0816   | 0.0391  | 0.03192      | 0.209        |
| 46   | 4      | 1       | 0.0612   | 0.0342  | 0.02045      | 0.183        |
| 47   | 3      | 1       | 0.0408   | 0.0283  | 0.0105       | 0.159        |
| 64   | 2      | 1       | 0.0204   | 0.0202  | 0.00293      | 0.142        |
| 65   | 1      | 1       | 0        | NaN     | NA           | NA           |

**Table S116.** Kiraz station Kaplan-Meier survival estimates according to SPI-12

| Kaplan-Meier Wet to Dry (SPI12) |        |         |          |         |              |              |
|---------------------------------|--------|---------|----------|---------|--------------|--------------|
|                                 |        | n       | events   | median  | 0.95LCL      | 0.95UCL      |
|                                 |        | 50      | 50       | 32.5    | 29           | 37           |
| time                            | n.risk | n.event | survival | std.err | lower 95% CL | upper 95% CL |

|     |    |   |      |        |         |       |
|-----|----|---|------|--------|---------|-------|
| 9   | 50 | 1 | 0.98 | 0.0198 | 0.94195 | 1     |
| 11  | 49 | 1 | 0.96 | 0.0277 | 0.90719 | 1     |
| 12  | 48 | 1 | 0.94 | 0.0336 | 0.87643 | 1     |
| 13  | 47 | 1 | 0.92 | 0.0384 | 0.84779 | 0.998 |
| 14  | 46 | 1 | 0.9  | 0.0424 | 0.82057 | 0.987 |
| 15  | 45 | 1 | 0.88 | 0.046  | 0.79438 | 0.975 |
| 16  | 44 | 1 | 0.86 | 0.0491 | 0.769   | 0.962 |
| 17  | 43 | 1 | 0.84 | 0.0518 | 0.74429 | 0.948 |
| 18  | 42 | 1 | 0.82 | 0.0543 | 0.72014 | 0.934 |
| 19  | 41 | 1 | 0.8  | 0.0566 | 0.69647 | 0.919 |
| 25  | 40 | 1 | 0.78 | 0.0586 | 0.67323 | 0.904 |
| 26  | 39 | 2 | 0.74 | 0.062  | 0.62788 | 0.872 |
| 27  | 37 | 2 | 0.7  | 0.0648 | 0.58384 | 0.839 |
| 28  | 35 | 2 | 0.66 | 0.067  | 0.54093 | 0.805 |
| 29  | 33 | 2 | 0.62 | 0.0686 | 0.49906 | 0.77  |
| 30  | 31 | 2 | 0.58 | 0.0698 | 0.45813 | 0.734 |
| 31  | 29 | 2 | 0.54 | 0.0705 | 0.41811 | 0.697 |
| 32  | 27 | 2 | 0.5  | 0.0707 | 0.37896 | 0.66  |
| 33  | 25 | 2 | 0.46 | 0.0705 | 0.34067 | 0.621 |
| 34  | 23 | 2 | 0.42 | 0.0698 | 0.30324 | 0.582 |
| 35  | 21 | 2 | 0.38 | 0.0686 | 0.2667  | 0.541 |
| 36  | 19 | 2 | 0.34 | 0.067  | 0.23108 | 0.5   |
| 37  | 17 | 2 | 0.3  | 0.0648 | 0.19644 | 0.458 |
| 38  | 15 | 1 | 0.28 | 0.0635 | 0.17952 | 0.437 |
| 39  | 14 | 1 | 0.26 | 0.062  | 0.16289 | 0.415 |
| 40  | 13 | 1 | 0.24 | 0.0604 | 0.14655 | 0.393 |
| 41  | 12 | 1 | 0.22 | 0.0586 | 0.13054 | 0.371 |
| 42  | 11 | 1 | 0.2  | 0.0566 | 0.11489 | 0.348 |
| 43  | 10 | 1 | 0.18 | 0.0543 | 0.09962 | 0.325 |
| 44  | 9  | 1 | 0.16 | 0.0518 | 0.08478 | 0.302 |
| 45  | 8  | 1 | 0.14 | 0.0491 | 0.07043 | 0.278 |
| 46  | 7  | 1 | 0.12 | 0.046  | 0.05665 | 0.254 |
| 47  | 6  | 1 | 0.1  | 0.0424 | 0.04354 | 0.23  |
| 48  | 5  | 1 | 0.08 | 0.0384 | 0.03125 | 0.205 |
| 49  | 4  | 1 | 0.06 | 0.0336 | 0.02003 | 0.18  |
| 96  | 3  | 1 | 0.04 | 0.0277 | 0.01029 | 0.156 |
| 120 | 2  | 1 | 0.02 | 0.0198 | 0.00287 | 0.139 |
| 121 | 1  | 1 | 0    | NaN    | NA      | NA    |

**Table S117.** Kiraz station Kaplan-Meier drought risk estimates according to SPI-3, 6, and 12

| Drought Risk (SPI3) |              | Drought Risk (SPI6) |              | Drought Risk (SPI12) |              |
|---------------------|--------------|---------------------|--------------|----------------------|--------------|
| Time                | Drought Risk | Time                | Drought Risk | Time                 | Drought Risk |
| 1                   | 0.0702       | 1                   | 0.0204       | 3                    | 0.006667     |
| 2                   | 0.1053       | 2                   | 0.0816       | 6                    | 0.013333     |

|    |        |    |        |     |      |
|----|--------|----|--------|-----|------|
| 3  | 0.1754 | 3  | 0.1429 | 9   | 0.02 |
| 4  | 0.2982 | 4  | 0.1837 | 11  | 0.04 |
| 5  | 0.4035 | 5  | 0.2245 | 12  | 0.06 |
| 6  | 0.4737 | 6  | 0.2653 | 13  | 0.08 |
| 7  | 0.5263 | 7  | 0.3265 | 14  | 0.1  |
| 8  | 0.5614 | 8  | 0.3878 | 15  | 0.12 |
| 9  | 0.614  | 9  | 0.449  | 16  | 0.14 |
| 10 | 0.6667 | 11 | 0.4898 | 17  | 0.16 |
| 11 | 0.7193 | 12 | 0.5102 | 18  | 0.18 |
| 12 | 0.7544 | 13 | 0.5306 | 19  | 0.2  |
| 13 | 0.7719 | 14 | 0.551  | 25  | 0.22 |
| 16 | 0.807  | 15 | 0.5714 | 26  | 0.26 |
| 17 | 0.8421 | 16 | 0.6122 | 27  | 0.3  |
| 18 | 0.8947 | 17 | 0.6327 | 28  | 0.34 |
| 19 | 0.9123 | 23 | 0.6531 | 29  | 0.38 |
| 28 | 0.9298 | 26 | 0.6735 | 30  | 0.42 |
| 29 | 0.9474 | 27 | 0.7143 | 31  | 0.46 |
| 37 | 0.9649 | 28 | 0.7347 | 32  | 0.5  |
| 48 | 0.9825 | 29 | 0.7551 | 33  | 0.54 |
| 49 | 1      | 30 | 0.7755 | 34  | 0.58 |
|    |        | 31 | 0.7959 | 35  | 0.62 |
|    |        | 32 | 0.8163 | 36  | 0.66 |
|    |        | 33 | 0.8367 | 37  | 0.7  |
|    |        | 34 | 0.8571 | 38  | 0.72 |
|    |        | 37 | 0.8776 | 39  | 0.74 |
|    |        | 44 | 0.898  | 40  | 0.76 |
|    |        | 45 | 0.9184 | 41  | 0.78 |
|    |        | 46 | 0.9388 | 42  | 0.8  |
|    |        | 47 | 0.9592 | 43  | 0.82 |
|    |        | 64 | 0.9796 | 44  | 0.84 |
|    |        | 65 | 1      | 45  | 0.86 |
|    |        |    |        | 46  | 0.88 |
|    |        |    |        | 47  | 0.9  |
|    |        |    |        | 48  | 0.92 |
|    |        |    |        | 49  | 0.94 |
|    |        |    |        | 96  | 0.96 |
|    |        |    |        | 120 | 0.98 |
|    |        |    |        | 121 | 1    |

**Table S118.** Kiraz station Kaplan-Meier survival estimates according to SPEI-3

| Kaplan-Meier Wet to Dry (SPEI3) |  |    |        |        |         |         |
|---------------------------------|--|----|--------|--------|---------|---------|
|                                 |  | n  | events | median | 0.95LCL | 0.95UCL |
|                                 |  | 66 | 66     | 17     | 13      | 23      |



| time | n.risk | n.event | survival | std.err | lower 95% CI | upper 95% CI |
|------|--------|---------|----------|---------|--------------|--------------|
| 1    | 66     | 1       | 0.9848   | 0.015   | 0.95581      | 1.000        |
| 2    | 65     | 2       | 0.9545   | 0.0256  | 0.90559      | 1.000        |
| 3    | 63     | 2       | 0.9242   | 0.0326  | 0.86256      | 0.99         |
| 4    | 61     | 1       | 0.9091   | 0.0354  | 0.84231      | 0.981        |
| 5    | 60     | 2       | 0.8788   | 0.0402  | 0.80347      | 0.961        |
| 6    | 58     | 1       | 0.8636   | 0.0422  | 0.78469      | 0.951        |
| 7    | 57     | 2       | 0.8333   | 0.0459  | 0.7481       | 0.928        |
| 8    | 55     | 2       | 0.803    | 0.049   | 0.71259      | 0.905        |
| 9    | 53     | 2       | 0.7727   | 0.0516  | 0.67796      | 0.881        |
| 10   | 51     | 3       | 0.7273   | 0.0548  | 0.62739      | 0.843        |
| 11   | 48     | 3       | 0.6818   | 0.0573  | 0.57822      | 0.804        |
| 12   | 45     | 3       | 0.6364   | 0.0592  | 0.53028      | 0.764        |
| 13   | 42     | 2       | 0.6061   | 0.0601  | 0.49893      | 0.736        |
| 14   | 40     | 2       | 0.5758   | 0.0608  | 0.46806      | 0.708        |
| 15   | 38     | 2       | 0.5455   | 0.0613  | 0.43763      | 0.68         |
| 16   | 36     | 2       | 0.5152   | 0.0615  | 0.40765      | 0.651        |
| 17   | 34     | 2       | 0.4848   | 0.0615  | 0.3781       | 0.622        |
| 18   | 32     | 2       | 0.4545   | 0.0613  | 0.34898      | 0.592        |
| 19   | 30     | 2       | 0.4242   | 0.0608  | 0.3203       | 0.562        |
| 20   | 28     | 2       | 0.3939   | 0.0601  | 0.29206      | 0.531        |
| 21   | 26     | 1       | 0.3788   | 0.0597  | 0.27811      | 0.516        |
| 22   | 25     | 1       | 0.3636   | 0.0592  | 0.26428      | 0.5          |
| 23   | 24     | 1       | 0.3485   | 0.0587  | 0.25057      | 0.485        |
| 24   | 23     | 1       | 0.3333   | 0.058   | 0.23698      | 0.469        |
| 37   | 22     | 1       | 0.3182   | 0.0573  | 0.22351      | 0.453        |
| 38   | 21     | 1       | 0.303    | 0.0566  | 0.21018      | 0.437        |
| 39   | 20     | 1       | 0.2879   | 0.0557  | 0.19698      | 0.421        |
| 40   | 19     | 1       | 0.2727   | 0.0548  | 0.18392      | 0.404        |
| 41   | 18     | 1       | 0.2576   | 0.0538  | 0.17101      | 0.388        |
| 42   | 17     | 1       | 0.2424   | 0.0528  | 0.15825      | 0.371        |
| 86   | 16     | 1       | 0.2273   | 0.0516  | 0.14566      | 0.355        |
| 87   | 15     | 1       | 0.2121   | 0.0503  | 0.13325      | 0.338        |
| 88   | 14     | 1       | 0.197    | 0.049   | 0.12102      | 0.321        |
| 89   | 13     | 1       | 0.1818   | 0.0475  | 0.10899      | 0.303        |
| 90   | 12     | 1       | 0.1667   | 0.0459  | 0.09718      | 0.286        |
| 91   | 11     | 1       | 0.1515   | 0.0441  | 0.08561      | 0.268        |
| 92   | 10     | 1       | 0.1364   | 0.0422  | 0.07431      | 0.25         |
| 93   | 9      | 1       | 0.1212   | 0.0402  | 0.0633       | 0.232        |
| 94   | 8      | 1       | 0.1061   | 0.0379  | 0.05265      | 0.214        |
| 95   | 7      | 1       | 0.0909   | 0.0354  | 0.04239      | 0.195        |
| 96   | 6      | 1       | 0.0758   | 0.0326  | 0.03262      | 0.176        |
| 152  | 5      | 1       | 0.0606   | 0.0294  | 0.02344      | 0.157        |
| 153  | 4      | 1       | 0.0455   | 0.0256  | 0.01505      | 0.137        |

|     |   |   |        |        |         |       |
|-----|---|---|--------|--------|---------|-------|
| 154 | 3 | 1 | 0.0303 | 0.0211 | 0.00774 | 0.119 |
| 155 | 2 | 1 | 0.0152 | 0.015  | 0.00217 | 0.106 |
| 156 | 1 | 1 | 0      | NaN    | NA      | NA    |

**Table S119.** Kiraz station Kaplan-Meier survival estimates according to SPEI-6

| Kaplan-Meier Wet to Dry (SPEI6) |        |         |          |         |              |              |
|---------------------------------|--------|---------|----------|---------|--------------|--------------|
|                                 |        | n       | events   | median  | 0.95LCL      | 0.95UCL      |
|                                 |        | 70      | 70       | 9       | 8            | 11           |
| time                            | n.risk | n.event | survival | std.err | lower 95% CI | upper 95% CI |
| 2                               | 70     | 1       | 0.9857   | 0.0142  | 0.9583       | 1.000        |
| 3                               | 69     | 1       | 0.9714   | 0.0199  | 0.93317      | 1.000        |
| 4                               | 68     | 1       | 0.9571   | 0.0242  | 0.91085      | 1.000        |
| 5                               | 67     | 2       | 0.9286   | 0.0308  | 0.87016      | 0.991        |
| 6                               | 65     | 6       | 0.8429   | 0.0435  | 0.76177      | 0.933        |
| 7                               | 59     | 8       | 0.7286   | 0.0532  | 0.6315       | 0.841        |
| 8                               | 51     | 9       | 0.6      | 0.0586  | 0.49554      | 0.726        |
| 9                               | 42     | 8       | 0.4857   | 0.0597  | 0.38167      | 0.618        |
| 10                              | 34     | 6       | 0.4      | 0.0586  | 0.30023      | 0.533        |
| 11                              | 28     | 4       | 0.3429   | 0.0567  | 0.24789      | 0.474        |
| 12                              | 24     | 3       | 0.3      | 0.0548  | 0.20976      | 0.429        |
| 13                              | 21     | 2       | 0.2714   | 0.0532  | 0.18492      | 0.398        |
| 14                              | 19     | 1       | 0.2571   | 0.0522  | 0.17268      | 0.383        |
| 15                              | 18     | 1       | 0.2429   | 0.0513  | 0.16059      | 0.367        |
| 16                              | 17     | 1       | 0.2286   | 0.0502  | 0.14863      | 0.352        |
| 20                              | 16     | 1       | 0.2143   | 0.049   | 0.13683      | 0.336        |
| 21                              | 15     | 2       | 0.1857   | 0.0465  | 0.11371      | 0.303        |
| 22                              | 13     | 1       | 0.1714   | 0.045   | 0.10243      | 0.287        |
| 23                              | 12     | 1       | 0.1571   | 0.0435  | 0.09134      | 0.27         |
| 24                              | 11     | 1       | 0.1429   | 0.0418  | 0.08048      | 0.254        |
| 25                              | 10     | 1       | 0.1286   | 0.04    | 0.06987      | 0.237        |
| 26                              | 9      | 1       | 0.1143   | 0.038   | 0.05953      | 0.219        |
| 27                              | 8      | 2       | 0.0857   | 0.0335  | 0.03988      | 0.184        |
| 28                              | 6      | 1       | 0.0714   | 0.0308  | 0.03069      | 0.166        |
| 29                              | 5      | 1       | 0.0571   | 0.0277  | 0.02206      | 0.148        |
| 30                              | 4      | 1       | 0.0429   | 0.0242  | 0.01417      | 0.13         |
| 48                              | 3      | 1       | 0.0286   | 0.0199  | 0.00729      | 0.112        |
| 64                              | 2      | 1       | 0.0143   | 0.0142  | 0.00204      | 0.1          |
| 65                              | 1      | 1       | 0        | NaN     | NA           | NA           |

**Table S120.** Kiraz station Kaplan-Meier survival estimates according to SPEI-12

| Kaplan-Meier Wet to Dry (SPEI12) |  |   |        |        |         |         |
|----------------------------------|--|---|--------|--------|---------|---------|
|                                  |  | n | events | median | 0.95LCL | 0.95UCL |

|      |        | 60      | 60       | 8       | 6            | 13           |
|------|--------|---------|----------|---------|--------------|--------------|
| time | n.risk | n.event | survival | std.err | lower 95% CI | upper 95% CI |
| 1    | 60     | 7       | 0.8833   | 0.0414  | 0.80573      | 0.968        |
| 2    | 53     | 4       | 0.8167   | 0.05    | 0.7244       | 0.921        |
| 3    | 49     | 3       | 0.7667   | 0.0546  | 0.66678      | 0.882        |
| 4    | 46     | 3       | 0.7167   | 0.0582  | 0.61125      | 0.84         |
| 5    | 43     | 3       | 0.6667   | 0.0609  | 0.55745      | 0.797        |
| 6    | 40     | 4       | 0.6      | 0.0632  | 0.48801      | 0.738        |
| 7    | 36     | 4       | 0.5333   | 0.0644  | 0.42093      | 0.676        |
| 8    | 32     | 3       | 0.4833   | 0.0645  | 0.37208      | 0.628        |
| 9    | 29     | 2       | 0.45     | 0.0642  | 0.34019      | 0.595        |
| 10   | 27     | 2       | 0.4167   | 0.0636  | 0.30886      | 0.562        |
| 11   | 25     | 1       | 0.4      | 0.0632  | 0.29341      | 0.545        |
| 12   | 24     | 2       | 0.3667   | 0.0622  | 0.26293      | 0.511        |
| 13   | 22     | 2       | 0.3333   | 0.0609  | 0.23306      | 0.477        |
| 14   | 20     | 2       | 0.3      | 0.0592  | 0.20383      | 0.442        |
| 15   | 18     | 2       | 0.2667   | 0.0571  | 0.17528      | 0.406        |
| 16   | 16     | 1       | 0.25     | 0.0559  | 0.16129      | 0.388        |
| 17   | 15     | 1       | 0.2333   | 0.0546  | 0.1475       | 0.369        |
| 18   | 14     | 1       | 0.2167   | 0.0532  | 0.13392      | 0.351        |
| 19   | 13     | 1       | 0.2      | 0.0516  | 0.12057      | 0.332        |
| 20   | 12     | 1       | 0.1833   | 0.05    | 0.10748      | 0.313        |
| 21   | 11     | 1       | 0.1667   | 0.0481  | 0.09465      | 0.293        |
| 22   | 10     | 1       | 0.15     | 0.0461  | 0.08213      | 0.274        |
| 23   | 9      | 1       | 0.1333   | 0.0439  | 0.06995      | 0.254        |
| 24   | 8      | 1       | 0.1167   | 0.0414  | 0.05815      | 0.234        |
| 25   | 7      | 1       | 0.1      | 0.0387  | 0.04681      | 0.214        |
| 27   | 6      | 1       | 0.0833   | 0.0357  | 0.036        | 0.193        |
| 28   | 5      | 1       | 0.0667   | 0.0322  | 0.02587      | 0.172        |
| 29   | 4      | 1       | 0.05     | 0.0281  | 0.01659      | 0.151        |
| 106  | 3      | 1       | 0.0333   | 0.0232  | 0.00853      | 0.13         |
| 120  | 2      | 1       | 0.0167   | 0.0165  | 0.00239      | 0.116        |
| 121  | 1      | 1       | 0        | NaN     | NA           | NA           |

**Table S121.** Kiraz station Kaplan-Meier drought risk estimates according to SPEI-3, 6, and 12

| Drought Risk (SPEI3) |              | Drought Risk (SPEI6) |              | Drought Risk (SPEI12) |              |
|----------------------|--------------|----------------------|--------------|-----------------------|--------------|
| Time                 | Drought Risk | Time                 | Drought Risk | Time                  | Drought Risk |
| 1                    | 0.0152       | 2                    | 0.0143       | 1                     | 0.1167       |
| 2                    | 0.0455       | 3                    | 0.0286       | 2                     | 0.1833       |
| 3                    | 0.0758       | 4                    | 0.0429       | 3                     | 0.2333       |
| 4                    | 0.0909       | 5                    | 0.0714       | 4                     | 0.2833       |
| 5                    | 0.1212       | 6                    | 0.1571       | 5                     | 0.3333       |
| 6                    | 0.1364       | 7                    | 0.2714       | 6                     | 0.4          |

|     |        |    |        |     |        |
|-----|--------|----|--------|-----|--------|
| 7   | 0.1667 | 8  | 0.4    | 7   | 0.4667 |
| 8   | 0.197  | 9  | 0.5143 | 8   | 0.5167 |
| 9   | 0.2273 | 10 | 0.6    | 9   | 0.55   |
| 10  | 0.2727 | 11 | 0.6571 | 10  | 0.5833 |
| 11  | 0.3182 | 12 | 0.7    | 11  | 0.6    |
| 12  | 0.3636 | 13 | 0.7286 | 12  | 0.6333 |
| 13  | 0.3939 | 14 | 0.7429 | 13  | 0.6667 |
| 14  | 0.4242 | 15 | 0.7571 | 14  | 0.7    |
| 15  | 0.4545 | 16 | 0.7714 | 15  | 0.7333 |
| 16  | 0.4848 | 20 | 0.7857 | 16  | 0.75   |
| 17  | 0.5152 | 21 | 0.8143 | 17  | 0.7667 |
| 18  | 0.5455 | 22 | 0.8286 | 18  | 0.7833 |
| 19  | 0.5758 | 23 | 0.8429 | 19  | 0.8    |
| 20  | 0.6061 | 24 | 0.8571 | 20  | 0.8167 |
| 21  | 0.6212 | 25 | 0.8714 | 21  | 0.8333 |
| 22  | 0.6364 | 26 | 0.8857 | 22  | 0.85   |
| 23  | 0.6515 | 27 | 0.9143 | 23  | 0.8667 |
| 24  | 0.6667 | 28 | 0.9286 | 24  | 0.8833 |
| 37  | 0.6818 | 29 | 0.9429 | 25  | 0.9    |
| 38  | 0.697  | 30 | 0.9571 | 27  | 0.9167 |
| 39  | 0.7121 | 48 | 0.9714 | 28  | 0.9333 |
| 40  | 0.7273 | 64 | 0.9857 | 29  | 0.95   |
| 41  | 0.7424 | 65 | 1      | 106 | 0.9667 |
| 42  | 0.7576 |    |        | 120 | 0.9833 |
| 86  | 0.7727 |    |        | 121 | 1      |
| 87  | 0.7879 |    |        |     |        |
| 88  | 0.803  |    |        |     |        |
| 89  | 0.8182 |    |        |     |        |
| 90  | 0.8333 |    |        |     |        |
| 91  | 0.8485 |    |        |     |        |
| 92  | 0.8636 |    |        |     |        |
| 93  | 0.8788 |    |        |     |        |
| 94  | 0.8939 |    |        |     |        |
| 95  | 0.9091 |    |        |     |        |
| 96  | 0.9242 |    |        |     |        |
| 152 | 0.9394 |    |        |     |        |
| 153 | 0.9545 |    |        |     |        |
| 154 | 0.9697 |    |        |     |        |
| 155 | 0.9848 |    |        |     |        |
| 156 | 1      |    |        |     |        |

**Table S122.** Kirkagac station Kaplan-Meier survival estimates according to SPI-3

| Kaplan-Meier Wet to Dry (SPI3) |  |   |        |        |         |         |
|--------------------------------|--|---|--------|--------|---------|---------|
|                                |  | n | events | median | 0.95LCL | 0.95UCL |

|      |        |         |          |         |              |              |
|------|--------|---------|----------|---------|--------------|--------------|
|      |        | 39      | 39       | 7       | 5            | 12           |
| time | n.risk | n.event | survival | std.err | lower 95% CL | upper 95% CL |
| 1    | 39     | 5       | 0.8718   | 0.0535  | 0.7729       | 0.983        |
| 2    | 34     | 2       | 0.8205   | 0.0615  | 0.7085       | 0.95         |
| 3    | 32     | 4       | 0.7179   | 0.0721  | 0.5897       | 0.874        |
| 4    | 28     | 3       | 0.641    | 0.0768  | 0.5068       | 0.811        |
| 5    | 25     | 2       | 0.5897   | 0.0788  | 0.4539       | 0.766        |
| 6    | 23     | 3       | 0.5128   | 0.08    | 0.3777       | 0.696        |
| 7    | 20     | 1       | 0.4872   | 0.08    | 0.3531       | 0.672        |
| 8    | 19     | 2       | 0.4359   | 0.0794  | 0.305        | 0.623        |
| 9    | 17     | 3       | 0.359    | 0.0768  | 0.236        | 0.546        |
| 11   | 14     | 1       | 0.3333   | 0.0755  | 0.2139       | 0.52         |
| 12   | 13     | 1       | 0.3077   | 0.0739  | 0.1922       | 0.493        |
| 13   | 12     | 2       | 0.2564   | 0.0699  | 0.1503       | 0.438        |
| 14   | 10     | 1       | 0.2308   | 0.0675  | 0.1301       | 0.409        |
| 15   | 9      | 1       | 0.2051   | 0.0647  | 0.1106       | 0.38         |
| 16   | 8      | 3       | 0.1282   | 0.0535  | 0.0566       | 0.291        |
| 17   | 5      | 1       | 0.1026   | 0.0486  | 0.0405       | 0.26         |
| 18   | 4      | 1       | 0.0769   | 0.0427  | 0.0259       | 0.228        |
| 24   | 3      | 1       | 0.0513   | 0.0353  | 0.0133       | 0.198        |
| 25   | 2      | 2       | 0        | NaN     | NA           | NA           |

**Table S123.** Kirkagac station Kaplan-Meier survival estimates according to SPI-6

| Kaplan-Meier Wet to Dry (SPI6) |        |         |          |         |              |              |
|--------------------------------|--------|---------|----------|---------|--------------|--------------|
|                                |        | n       | events   | median  | 0.95LCL      | 0.95UCL      |
|                                |        | 41      | 41       | 12      | 6            | 17           |
| time                           | n.risk | n.event | survival | std.err | lower 95% CL | upper 95% CL |
| 1                              | 41     | 6       | 0.8537   | 0.0552  | 0.75204      | 0.969        |
| 2                              | 35     | 4       | 0.7561   | 0.0671  | 0.63544      | 0.9          |
| 3                              | 31     | 2       | 0.7073   | 0.0711  | 0.5809       | 0.861        |
| 4                              | 29     | 1       | 0.6829   | 0.0727  | 0.55436      | 0.841        |
| 5                              | 28     | 2       | 0.6341   | 0.0752  | 0.50259      | 0.8          |
| 6                              | 26     | 1       | 0.6098   | 0.0762  | 0.47732      | 0.779        |
| 7                              | 25     | 1       | 0.5854   | 0.0769  | 0.45242      | 0.757        |
| 10                             | 24     | 1       | 0.561    | 0.0775  | 0.4279       | 0.735        |
| 11                             | 23     | 2       | 0.5122   | 0.0781  | 0.37993      | 0.691        |
| 12                             | 21     | 1       | 0.4878   | 0.0781  | 0.35647      | 0.668        |
| 13                             | 20     | 1       | 0.4634   | 0.0779  | 0.33337      | 0.644        |
| 15                             | 19     | 3       | 0.3902   | 0.0762  | 0.26617      | 0.572        |
| 16                             | 16     | 2       | 0.3415   | 0.0741  | 0.22322      | 0.522        |
| 17                             | 14     | 1       | 0.3171   | 0.0727  | 0.20233      | 0.497        |
| 18                             | 13     | 1       | 0.2927   | 0.0711  | 0.18186      | 0.471        |

|    |    |   |        |        |         |       |
|----|----|---|--------|--------|---------|-------|
| 19 | 12 | 1 | 0.2683 | 0.0692 | 0.16184 | 0.445 |
| 20 | 11 | 1 | 0.2439 | 0.0671 | 0.14229 | 0.418 |
| 21 | 10 | 1 | 0.2195 | 0.0646 | 0.12325 | 0.391 |
| 22 | 9  | 1 | 0.1951 | 0.0619 | 0.10479 | 0.363 |
| 24 | 8  | 1 | 0.1707 | 0.0588 | 0.08696 | 0.335 |
| 25 | 7  | 1 | 0.1463 | 0.0552 | 0.06987 | 0.307 |
| 26 | 6  | 1 | 0.122  | 0.0511 | 0.05364 | 0.277 |
| 27 | 5  | 2 | 0.0732 | 0.0407 | 0.02462 | 0.217 |
| 37 | 3  | 2 | 0.0244 | 0.0241 | 0.00352 | 0.169 |
| 38 | 1  | 1 | 0      | NaN    | NA      | NA    |

**Table S124.** Kirkagac station Kaplan-Meier survival estimates according to SPI-12

| Kaplan-Meier Wet to Dry (SPI12) |        |         |          |         |              |              |
|---------------------------------|--------|---------|----------|---------|--------------|--------------|
|                                 |        | n       | events   | median  | 0.95LCL      | 0.95UCL      |
|                                 |        | 34      | 34       | 23.5    | 19           | 40           |
| time                            | n.risk | n.event | survival | std.err | lower 95% CL | upper 95% CL |
| 1                               | 34     | 2       | 0.9412   | 0.0404  | 0.86532      | 1            |
| 2                               | 32     | 1       | 0.9118   | 0.0486  | 0.82124      | 1            |
| 3                               | 31     | 1       | 0.8824   | 0.0553  | 0.78044      | 0.998        |
| 4                               | 30     | 1       | 0.8529   | 0.0607  | 0.74183      | 0.981        |
| 5                               | 29     | 1       | 0.8235   | 0.0654  | 0.70486      | 0.962        |
| 8                               | 28     | 1       | 0.7941   | 0.0693  | 0.6692       | 0.942        |
| 14                              | 27     | 1       | 0.7647   | 0.0727  | 0.63463      | 0.921        |
| 15                              | 26     | 1       | 0.7353   | 0.0757  | 0.601        | 0.9          |
| 16                              | 25     | 1       | 0.7059   | 0.0781  | 0.5682       | 0.877        |
| 17                              | 24     | 1       | 0.6765   | 0.0802  | 0.53616      | 0.853        |
| 18                              | 23     | 1       | 0.6471   | 0.082   | 0.50481      | 0.829        |
| 19                              | 22     | 1       | 0.6176   | 0.0833  | 0.47412      | 0.805        |
| 20                              | 21     | 1       | 0.5882   | 0.0844  | 0.44403      | 0.779        |
| 21                              | 20     | 1       | 0.5588   | 0.0852  | 0.41454      | 0.753        |
| 22                              | 19     | 1       | 0.5294   | 0.0856  | 0.38562      | 0.727        |
| 23                              | 18     | 1       | 0.5      | 0.0857  | 0.35726      | 0.7          |
| 24                              | 17     | 1       | 0.4706   | 0.0856  | 0.32946      | 0.672        |
| 25                              | 16     | 1       | 0.4412   | 0.0852  | 0.30222      | 0.644        |
| 36                              | 15     | 1       | 0.4118   | 0.0844  | 0.27553      | 0.615        |
| 37                              | 14     | 1       | 0.3824   | 0.0833  | 0.24942      | 0.586        |
| 38                              | 13     | 1       | 0.3529   | 0.082   | 0.2239       | 0.556        |
| 39                              | 12     | 1       | 0.3235   | 0.0802  | 0.19899      | 0.526        |
| 40                              | 11     | 1       | 0.2941   | 0.0781  | 0.17473      | 0.495        |
| 41                              | 10     | 1       | 0.2647   | 0.0757  | 0.15117      | 0.464        |
| 42                              | 9      | 1       | 0.2353   | 0.0727  | 0.12836      | 0.431        |
| 65                              | 8      | 1       | 0.2059   | 0.0693  | 0.10639      | 0.398        |
| 66                              | 7      | 1       | 0.1765   | 0.0654  | 0.08537      | 0.365        |

|    |   |   |        |        |         |       |
|----|---|---|--------|--------|---------|-------|
| 67 | 6 | 1 | 0.1471 | 0.0607 | 0.06545 | 0.33  |
| 68 | 5 | 1 | 0.1176 | 0.0553 | 0.04686 | 0.295 |
| 69 | 4 | 1 | 0.0882 | 0.0486 | 0.02995 | 0.26  |
| 70 | 3 | 1 | 0.0588 | 0.0404 | 0.01533 | 0.226 |
| 87 | 2 | 1 | 0.0294 | 0.029  | 0.00427 | 0.203 |
| 88 | 1 | 1 | 0      | NaN    | NA      | NA    |

**Table S125.** Kirkagac station Kaplan-Meier drought risk estimates according to SPI-3, 6, and 12

| Drought Risk (SPI3) |              | Drought Risk (SPI6) |              | Drought Risk (SPI12) |              |
|---------------------|--------------|---------------------|--------------|----------------------|--------------|
| Time                | Drought Risk | Time                | Drought Risk | Time                 | Drought Risk |
| 1                   | 0.1282       | 1                   | 0.1463       | 1                    | 0.0588       |
| 2                   | 0.1795       | 2                   | 0.2439       | 2                    | 0.0882       |
| 3                   | 0.2821       | 3                   | 0.2927       | 3                    | 0.1176       |
| 4                   | 0.359        | 4                   | 0.3171       | 4                    | 0.1471       |
| 5                   | 0.4103       | 5                   | 0.3659       | 5                    | 0.1765       |
| 6                   | 0.4872       | 6                   | 0.3902       | 6                    | 0.1863       |
| 7                   | 0.5128       | 7                   | 0.4146       | 8                    | 0.2059       |
| 8                   | 0.5641       | 10                  | 0.439        | 12                   | 0.2255       |
| 9                   | 0.641        | 11                  | 0.4878       | 14                   | 0.2353       |
| 11                  | 0.6667       | 12                  | 0.5122       | 15                   | 0.2647       |
| 12                  | 0.6923       | 13                  | 0.5366       | 16                   | 0.2941       |
| 13                  | 0.7436       | 15                  | 0.6098       | 17                   | 0.3235       |
| 14                  | 0.7692       | 16                  | 0.6585       | 18                   | 0.3529       |
| 15                  | 0.7949       | 17                  | 0.6829       | 19                   | 0.3824       |
| 16                  | 0.8718       | 18                  | 0.7073       | 20                   | 0.4118       |
| 17                  | 0.8974       | 19                  | 0.7317       | 21                   | 0.4412       |
| 18                  | 0.9231       | 20                  | 0.7561       | 22                   | 0.4706       |
| 24                  | 0.9487       | 21                  | 0.7805       | 23                   | 0.5          |
| 25                  | 1            | 22                  | 0.8049       | 24                   | 0.5294       |
|                     |              | 24                  | 0.8293       | 25                   | 0.5588       |
|                     |              | 25                  | 0.8537       | 36                   | 0.5882       |
|                     |              | 26                  | 0.878        | 37                   | 0.6176       |
|                     |              | 27                  | 0.9268       | 38                   | 0.6471       |
|                     |              | 37                  | 0.9756       | 39                   | 0.6765       |
|                     |              | 38                  | 1            | 40                   | 0.7059       |
|                     |              |                     |              | 41                   | 0.7353       |
|                     |              |                     |              | 42                   | 0.7647       |
|                     |              |                     |              | 65                   | 0.7941       |
|                     |              |                     |              | 66                   | 0.8235       |
|                     |              |                     |              | 67                   | 0.8529       |
|                     |              |                     |              | 68                   | 0.8824       |
|                     |              |                     |              | 69                   | 0.9118       |
|                     |              |                     |              | 70                   | 0.9412       |
|                     |              |                     |              | 87                   | 0.9706       |

**Table S126.** Kirkagac station Kaplan-Meier survival estimates according to SPEI-3

| Kaplan-Meier Wet to Dry (SPEI3) |        |         |          |         |              |              |
|---------------------------------|--------|---------|----------|---------|--------------|--------------|
|                                 |        | n       | events   | median  | 0.95LCL      | 0.95UCL      |
|                                 |        | 48      | 48       | 5       | 3            | 8            |
| time                            | n.risk | n.event | survival | std.err | lower 95% CI | upper 95% CI |
| 1                               | 48     | 6       | 0.875    | 0.0477  | 0.7863       | 0.974        |
| 2                               | 42     | 7       | 0.7292   | 0.0641  | 0.6137       | 0.866        |
| 3                               | 35     | 6       | 0.6042   | 0.0706  | 0.4805       | 0.76         |
| 4                               | 29     | 4       | 0.5208   | 0.0721  | 0.3971       | 0.683        |
| 5                               | 25     | 3       | 0.4583   | 0.0719  | 0.337        | 0.623        |
| 6                               | 22     | 1       | 0.4375   | 0.0716  | 0.3174       | 0.603        |
| 7                               | 21     | 2       | 0.3958   | 0.0706  | 0.2791       | 0.561        |
| 8                               | 19     | 3       | 0.3333   | 0.068   | 0.2234       | 0.497        |
| 9                               | 16     | 4       | 0.25     | 0.0625  | 0.1532       | 0.408        |
| 10                              | 12     | 3       | 0.1875   | 0.0563  | 0.1041       | 0.338        |
| 11                              | 9      | 1       | 0.1667   | 0.0538  | 0.0885       | 0.314        |
| 12                              | 8      | 1       | 0.1458   | 0.0509  | 0.0735       | 0.289        |
| 13                              | 7      | 3       | 0.0833   | 0.0399  | 0.0326       | 0.213        |
| 18                              | 4      | 1       | 0.0625   | 0.0349  | 0.0209       | 0.187        |
| 19                              | 3      | 1       | 0.0417   | 0.0288  | 0.0107       | 0.162        |
| 25                              | 2      | 1       | 0.0208   | 0.0206  | 0.003        | 0.145        |
| 48                              | 1      | 1       | 0        | NaN     | NA           | NA           |

**Table S127.** Kirkagac station Kaplan-Meier survival estimates according to SPEI-6

| Kaplan-Meier Wet to Dry (SPEI6) |        |         |          |         |              |              |
|---------------------------------|--------|---------|----------|---------|--------------|--------------|
|                                 |        | n       | events   | median  | 0.95LCL      | 0.95UCL      |
|                                 |        | 48      | 48       | 17      | 15           | 20           |
| time                            | n.risk | n.event | survival | std.err | lower 95% CI | upper 95% CI |
| 1                               | 48     | 3       | 0.9375   | 0.0349  | 0.8715       | 1.000        |
| 2                               | 45     | 2       | 0.8958   | 0.0441  | 0.8135       | 0.987        |
| 3                               | 43     | 1       | 0.875    | 0.0477  | 0.7863       | 0.974        |
| 4                               | 42     | 1       | 0.8542   | 0.0509  | 0.7599       | 0.96         |
| 5                               | 41     | 1       | 0.8333   | 0.0538  | 0.7343       | 0.946        |
| 6                               | 40     | 1       | 0.8125   | 0.0563  | 0.7093       | 0.931        |
| 7                               | 39     | 3       | 0.75     | 0.0625  | 0.637        | 0.883        |
| 8                               | 36     | 2       | 0.7083   | 0.0656  | 0.5907       | 0.849        |
| 9                               | 34     | 1       | 0.6875   | 0.0669  | 0.5681       | 0.832        |



|    |    |   |        |        |        |       |
|----|----|---|--------|--------|--------|-------|
| 10 | 33 | 1 | 0.6667 | 0.068  | 0.5458 | 0.814 |
| 14 | 32 | 1 | 0.6458 | 0.069  | 0.5238 | 0.796 |
| 15 | 31 | 3 | 0.5833 | 0.0712 | 0.4593 | 0.741 |
| 16 | 28 | 3 | 0.5208 | 0.0721 | 0.3971 | 0.683 |
| 17 | 25 | 2 | 0.4792 | 0.0721 | 0.3568 | 0.644 |
| 18 | 23 | 3 | 0.4167 | 0.0712 | 0.2981 | 0.582 |
| 19 | 20 | 2 | 0.375  | 0.0699 | 0.2603 | 0.54  |
| 20 | 18 | 2 | 0.3333 | 0.068  | 0.2234 | 0.497 |
| 21 | 16 | 2 | 0.2917 | 0.0656 | 0.1877 | 0.453 |
| 22 | 14 | 2 | 0.25   | 0.0625 | 0.1532 | 0.408 |
| 23 | 12 | 1 | 0.2292 | 0.0607 | 0.1364 | 0.385 |
| 24 | 11 | 1 | 0.2083 | 0.0586 | 0.12   | 0.362 |
| 25 | 10 | 1 | 0.1875 | 0.0563 | 0.1041 | 0.338 |
| 26 | 9  | 1 | 0.1667 | 0.0538 | 0.0885 | 0.314 |
| 27 | 8  | 1 | 0.1458 | 0.0509 | 0.0735 | 0.289 |
| 37 | 7  | 1 | 0.125  | 0.0477 | 0.0591 | 0.264 |
| 38 | 6  | 1 | 0.1042 | 0.0441 | 0.0454 | 0.239 |
| 39 | 5  | 1 | 0.0833 | 0.0399 | 0.0326 | 0.213 |
| 40 | 4  | 1 | 0.0625 | 0.0349 | 0.0209 | 0.187 |
| 41 | 3  | 1 | 0.0417 | 0.0288 | 0.0107 | 0.162 |
| 42 | 2  | 1 | 0.0208 | 0.0206 | 0.003  | 0.145 |
| 79 | 1  | 1 | 0      | NaN    | NA     | NA    |

**Table S128.** Kirkagac station Kaplan-Meier survival estimates according to SPEI-12

| Kaplan-Meier Wet to Dry (SPEI12) |        |         |          |         |              |              |
|----------------------------------|--------|---------|----------|---------|--------------|--------------|
|                                  |        | n       | events   | median  | 0.95LCL      | 0.95UCL      |
|                                  |        | 41      | 41       | 23      | 20           | 27           |
| time                             | n.risk | n.event | survival | std.err | lower 95% CI | upper 95% CI |
| 1                                | 41     | 2       | 0.9512   | 0.0336  | 0.88752      | 1.000        |
| 2                                | 39     | 1       | 0.9268   | 0.0407  | 0.85045      | 1.000        |
| 3                                | 38     | 2       | 0.878    | 0.0511  | 0.78339      | 0.984        |
| 4                                | 36     | 2       | 0.8293   | 0.0588  | 0.72173      | 0.953        |
| 5                                | 34     | 1       | 0.8049   | 0.0619  | 0.69227      | 0.936        |
| 8                                | 33     | 1       | 0.7805   | 0.0646  | 0.66354      | 0.918        |
| 9                                | 32     | 1       | 0.7561   | 0.0671  | 0.63544      | 0.9          |
| 17                               | 31     | 1       | 0.7317   | 0.0692  | 0.60791      | 0.881        |
| 18                               | 30     | 1       | 0.7073   | 0.0711  | 0.5809       | 0.861        |
| 19                               | 29     | 2       | 0.6585   | 0.0741  | 0.52827      | 0.821        |
| 20                               | 27     | 2       | 0.6098   | 0.0762  | 0.47732      | 0.779        |
| 21                               | 25     | 2       | 0.561    | 0.0775  | 0.4279       | 0.735        |
| 22                               | 23     | 2       | 0.5122   | 0.0781  | 0.37993      | 0.691        |
| 23                               | 21     | 2       | 0.4634   | 0.0779  | 0.33337      | 0.644        |
| 24                               | 19     | 2       | 0.4146   | 0.0769  | 0.28821      | 0.597        |
| 25                               | 17     | 2       | 0.3659   | 0.0752  | 0.24451      | 0.547        |
| 26                               | 15     | 1       | 0.3415   | 0.0741  | 0.22322      | 0.522        |
| 27                               | 14     | 1       | 0.3171   | 0.0727  | 0.20233      | 0.497        |
| 28                               | 13     | 1       | 0.2927   | 0.0711  | 0.18186      | 0.471        |
| 29                               | 12     | 1       | 0.2683   | 0.0692  | 0.16184      | 0.445        |
| 32                               | 11     | 1       | 0.2439   | 0.0671  | 0.14229      | 0.418        |
| 33                               | 10     | 1       | 0.2195   | 0.0646  | 0.12325      | 0.391        |
| 34                               | 9      | 1       | 0.1951   | 0.0619  | 0.10479      | 0.363        |
| 35                               | 8      | 1       | 0.1707   | 0.0588  | 0.08696      | 0.335        |
| 39                               | 7      | 1       | 0.1463   | 0.0552  | 0.06987      | 0.307        |
| 40                               | 6      | 1       | 0.122    | 0.0511  | 0.05364      | 0.277        |
| 41                               | 5      | 1       | 0.0976   | 0.0463  | 0.03846      | 0.248        |
| 42                               | 4      | 1       | 0.0732   | 0.0407  | 0.02462      | 0.217        |
| 43                               | 3      | 1       | 0.0488   | 0.0336  | 0.01262      | 0.188        |
| 44                               | 2      | 1       | 0.0244   | 0.0241  | 0.00352      | 0.169        |
| 87                               | 1      | 1       | 0        | NaN     | NA           | NA           |

**Table S129.** Kirkagac station Kaplan-Meier drought risk estimates according to SPEI-3, 6, and 12

| Drought Risk (SPEI3) |              | Drought Risk (SPEI6) |              | Drought Risk (SPEI12) |              |
|----------------------|--------------|----------------------|--------------|-----------------------|--------------|
| Time                 | Drought Risk | Time                 | Drought Risk | Time                  | Drought Risk |
| 1                    | 0.125        | 1                    | 0.0625       | 1                     | 0.0488       |
| 2                    | 0.2708       | 2                    | 0.1042       | 2                     | 0.0732       |

|    |        |    |         |    |          |
|----|--------|----|---------|----|----------|
| 3  | 0.3958 | 3  | 0.125   | 3  | 0.122    |
| 4  | 0.4792 | 4  | 0.1458  | 4  | 0.1707   |
| 5  | 0.5417 | 5  | 0.1667  | 5  | 0.1951   |
| 6  | 0.5625 | 6  | 0.1875  | 6  | 0.203233 |
| 7  | 0.6042 | 7  | 0.25    | 8  | 0.2195   |
| 8  | 0.6667 | 8  | 0.2917  | 9  | 0.2439   |
| 9  | 0.75   | 9  | 0.3125  | 12 | 0.25305  |
| 10 | 0.8125 | 10 | 0.3333  | 17 | 0.2683   |
| 11 | 0.8333 | 12 | 0.34375 | 18 | 0.2927   |
| 12 | 0.8542 | 14 | 0.3542  | 19 | 0.3415   |
| 13 | 0.9167 | 15 | 0.4167  | 20 | 0.3902   |
| 18 | 0.9375 | 16 | 0.4792  | 21 | 0.439    |
| 19 | 0.9583 | 17 | 0.5208  | 22 | 0.4878   |
| 25 | 0.9792 | 18 | 0.5833  | 23 | 0.5366   |
| 48 | 1      | 19 | 0.625   | 24 | 0.5854   |
|    |        | 20 | 0.6667  | 25 | 0.6341   |
|    |        | 21 | 0.7083  | 26 | 0.6585   |
|    |        | 22 | 0.75    | 27 | 0.6829   |
|    |        | 23 | 0.7708  | 28 | 0.7073   |
|    |        | 24 | 0.7917  | 29 | 0.7317   |
|    |        | 25 | 0.8125  | 32 | 0.7561   |
|    |        | 26 | 0.8333  | 33 | 0.7805   |
|    |        | 27 | 0.8542  | 34 | 0.8049   |
|    |        | 37 | 0.875   | 35 | 0.8293   |
|    |        | 38 | 0.8958  | 39 | 0.8537   |
|    |        | 39 | 0.9167  | 40 | 0.878    |
|    |        | 40 | 0.9375  | 41 | 0.9024   |
|    |        | 41 | 0.9583  | 42 | 0.9268   |
|    |        | 42 | 0.9792  | 43 | 0.9512   |
|    |        | 79 | 1       | 44 | 0.9756   |
|    |        |    |         | 87 | 1        |

**Table S130.** Kula station Kaplan-Meier survival estimates according to SPI-3

| Kaplan-Meier Wet to Dry (SPI3) |        |         |          |         |              |              |
|--------------------------------|--------|---------|----------|---------|--------------|--------------|
|                                |        | n       | events   | median  | 0.95LCL      | 0.95UCL      |
|                                |        | 118     | 118      | 8       | 7            | 10           |
| time                           | n.risk | n.event | survival | std.err | lower 95% CL | upper 95% CL |
| 1                              | 118    | 5       | 0.95763  | 0.01854 | 0.92196      | 0.9947       |
| 2                              | 113    | 5       | 0.91525  | 0.02564 | 0.86636      | 0.9669       |
| 3                              | 108    | 6       | 0.86441  | 0.03152 | 0.80479      | 0.9284       |
| 4                              | 102    | 3       | 0.83898  | 0.03384 | 0.77522      | 0.908        |
| 5                              | 99     | 10      | 0.75424  | 0.03963 | 0.68042      | 0.8361       |
| 6                              | 89     | 12      | 0.65254  | 0.04383 | 0.57204      | 0.7444       |
| 7                              | 77     | 13      | 0.54237  | 0.04586 | 0.45954      | 0.6401       |

|    |    |   |         |         |         |        |
|----|----|---|---------|---------|---------|--------|
| 8  | 64 | 7 | 0.48305 | 0.046   | 0.4008  | 0.5822 |
| 9  | 57 | 6 | 0.4322  | 0.0456  | 0.35146 | 0.5315 |
| 10 | 51 | 7 | 0.37288 | 0.04452 | 0.29509 | 0.4712 |
| 11 | 44 | 7 | 0.31356 | 0.04271 | 0.24009 | 0.4095 |
| 12 | 37 | 3 | 0.28814 | 0.04169 | 0.21699 | 0.3826 |
| 13 | 34 | 5 | 0.24576 | 0.03963 | 0.17916 | 0.3371 |
| 14 | 29 | 4 | 0.21186 | 0.03762 | 0.1496  | 0.3    |
| 15 | 25 | 2 | 0.19492 | 0.03647 | 0.13508 | 0.2813 |
| 17 | 23 | 2 | 0.17797 | 0.03521 | 0.12076 | 0.2623 |
| 18 | 21 | 2 | 0.16102 | 0.03384 | 0.10666 | 0.2431 |
| 19 | 19 | 1 | 0.15254 | 0.0331  | 0.0997  | 0.2334 |
| 20 | 18 | 3 | 0.12712 | 0.03066 | 0.07923 | 0.204  |
| 21 | 15 | 1 | 0.11864 | 0.02977 | 0.07256 | 0.194  |
| 22 | 14 | 3 | 0.09322 | 0.02676 | 0.0531  | 0.1636 |
| 23 | 11 | 2 | 0.07627 | 0.02443 | 0.04071 | 0.1429 |
| 24 | 9  | 3 | 0.05085 | 0.02022 | 0.02332 | 0.1109 |
| 25 | 6  | 3 | 0.02542 | 0.01449 | 0.00832 | 0.0777 |
| 26 | 3  | 1 | 0.01695 | 0.01188 | 0.00429 | 0.067  |
| 29 | 2  | 1 | 0.00847 | 0.00844 | 0.0012  | 0.0597 |
| 49 | 1  | 1 | 0       | NaN     | NA      | NA     |

**Table S131.** Kula station Kaplan-Meier survival estimates according to SPI-6

| Kaplan-Meier Wet to Dry (SPI6) |        |         |          |         |              |              |
|--------------------------------|--------|---------|----------|---------|--------------|--------------|
|                                |        | n       | events   | median  | 0.95LCL      | 0.95UCL      |
|                                |        | 124     | 124      | 11.5    | 10           | 16           |
| time                           | n.risk | n.event | survival | std.err | lower 95% CL | upper 95% CL |
| 1                              | 124    | 4       | 0.96774  | 0.01587 | 0.93714      | 0.9993       |
| 2                              | 120    | 7       | 0.91129  | 0.02553 | 0.8626       | 0.9627       |
| 3                              | 113    | 6       | 0.8629   | 0.03089 | 0.80444      | 0.9256       |
| 4                              | 107    | 2       | 0.84677  | 0.03235 | 0.78569      | 0.9126       |
| 5                              | 105    | 2       | 0.83065  | 0.03368 | 0.76719      | 0.8994       |
| 6                              | 103    | 7       | 0.77419  | 0.03755 | 0.70399      | 0.8514       |
| 7                              | 96     | 7       | 0.71774  | 0.04042 | 0.64274      | 0.8015       |
| 8                              | 89     | 7       | 0.66129  | 0.0425  | 0.58302      | 0.7501       |
| 9                              | 82     | 7       | 0.60484  | 0.0439  | 0.52463      | 0.6973       |
| 10                             | 75     | 7       | 0.54839  | 0.04469 | 0.46743      | 0.6434       |
| 11                             | 68     | 6       | 0.5      | 0.0449  | 0.4193       | 0.5962       |
| 12                             | 62     | 4       | 0.46774  | 0.04481 | 0.38767      | 0.5643       |
| 13                             | 58     | 2       | 0.45161  | 0.04469 | 0.37199      | 0.5483       |
| 14                             | 56     | 2       | 0.43548  | 0.04453 | 0.3564       | 0.5321       |
| 15                             | 54     | 3       | 0.41129  | 0.04419 | 0.33319      | 0.5077       |
| 16                             | 51     | 2       | 0.39516  | 0.0439  | 0.31784      | 0.4913       |
| 17                             | 49     | 3       | 0.37097  | 0.04338 | 0.29498      | 0.4665       |
| 18                             | 46     | 2       | 0.35484  | 0.04297 | 0.27987      | 0.4499       |

|    |    |   |         |         |         |        |
|----|----|---|---------|---------|---------|--------|
| 19 | 44 | 2 | 0.33871 | 0.0425  | 0.26486 | 0.4331 |
| 22 | 42 | 1 | 0.33065 | 0.04225 | 0.2574  | 0.4247 |
| 23 | 41 | 2 | 0.31452 | 0.0417  | 0.24255 | 0.4078 |
| 24 | 39 | 3 | 0.29032 | 0.04076 | 0.22048 | 0.3823 |
| 25 | 36 | 4 | 0.25806 | 0.03929 | 0.19148 | 0.3478 |
| 26 | 32 | 3 | 0.23387 | 0.03801 | 0.17007 | 0.3216 |
| 27 | 29 | 2 | 0.21774 | 0.03706 | 0.15598 | 0.304  |
| 28 | 27 | 2 | 0.20161 | 0.03603 | 0.14204 | 0.2862 |
| 31 | 25 | 1 | 0.19355 | 0.03548 | 0.13513 | 0.2772 |
| 32 | 24 | 3 | 0.16935 | 0.03368 | 0.11469 | 0.2501 |
| 33 | 21 | 3 | 0.14516 | 0.03163 | 0.0947  | 0.2225 |
| 34 | 18 | 3 | 0.12097 | 0.02928 | 0.07527 | 0.1944 |
| 35 | 15 | 3 | 0.09677 | 0.02655 | 0.05652 | 0.1657 |
| 36 | 12 | 3 | 0.07258 | 0.0233  | 0.03869 | 0.1362 |
| 37 | 9  | 2 | 0.05645 | 0.02073 | 0.02749 | 0.1159 |
| 38 | 7  | 3 | 0.03226 | 0.01587 | 0.0123  | 0.0846 |
| 39 | 4  | 2 | 0.01613 | 0.01131 | 0.00408 | 0.0638 |
| 40 | 2  | 1 | 0.00806 | 0.00803 | 0.00115 | 0.0568 |
| 49 | 1  | 1 | 0       | NaN     | NA      | NA     |

**Table S132.** Kula station Kaplan-Meier survival estimates according to SPI-12

| Kaplan-Meier Wet to Dry (SPI12) |        |         |          |         |              |              |
|---------------------------------|--------|---------|----------|---------|--------------|--------------|
|                                 |        | n       | events   | median  | 0.95LCL      | 0.95UCL      |
|                                 |        | 100     | 100      | 16.5    | 14           | 22           |
| time                            | n.risk | n.event | survival | std.err | lower 95% CL | upper 95% CL |
| 1                               | 100    | 3       | 0.97     | 0.01706 | 0.93714      | 1            |
| 2                               | 97     | 6       | 0.91     | 0.02862 | 0.8556       | 0.9679       |
| 3                               | 91     | 5       | 0.86     | 0.0347  | 0.79461      | 0.9308       |
| 4                               | 86     | 5       | 0.81     | 0.03923 | 0.73665      | 0.8907       |
| 5                               | 81     | 2       | 0.79     | 0.04073 | 0.71407      | 0.874        |
| 6                               | 79     | 2       | 0.77     | 0.04208 | 0.69178      | 0.8571       |
| 7                               | 77     | 2       | 0.75     | 0.0433  | 0.66976      | 0.8399       |
| 8                               | 75     | 2       | 0.73     | 0.0444  | 0.64797      | 0.8224       |
| 9                               | 73     | 1       | 0.72     | 0.0449  | 0.63716      | 0.8136       |
| 10                              | 72     | 2       | 0.7      | 0.04583 | 0.61571      | 0.7958       |
| 11                              | 70     | 2       | 0.68     | 0.04665 | 0.59445      | 0.7779       |
| 12                              | 68     | 3       | 0.65     | 0.0477  | 0.56293      | 0.7505       |
| 13                              | 65     | 3       | 0.62     | 0.04854 | 0.53181      | 0.7228       |
| 14                              | 62     | 4       | 0.58     | 0.04936 | 0.4909       | 0.6853       |
| 15                              | 58     | 4       | 0.54     | 0.04984 | 0.45064      | 0.6471       |
| 16                              | 54     | 4       | 0.5      | 0.05    | 0.41101      | 0.6083       |
| 17                              | 50     | 2       | 0.48     | 0.04996 | 0.39142      | 0.5886       |

|     |    |   |      |         |         |        |
|-----|----|---|------|---------|---------|--------|
| 18  | 48 | 2 | 0.46 | 0.04984 | 0.37199 | 0.5688 |
| 19  | 46 | 2 | 0.44 | 0.04964 | 0.35272 | 0.5489 |
| 20  | 44 | 2 | 0.42 | 0.04936 | 0.3336  | 0.5288 |
| 21  | 42 | 1 | 0.41 | 0.04918 | 0.3241  | 0.5187 |
| 22  | 41 | 2 | 0.39 | 0.04877 | 0.30522 | 0.4983 |
| 23  | 39 | 2 | 0.37 | 0.04828 | 0.2865  | 0.4778 |
| 24  | 37 | 2 | 0.35 | 0.0477  | 0.26796 | 0.4572 |
| 25  | 35 | 1 | 0.34 | 0.04737 | 0.25875 | 0.4468 |
| 26  | 34 | 1 | 0.33 | 0.04702 | 0.24959 | 0.4363 |
| 27  | 33 | 2 | 0.31 | 0.04625 | 0.2314  | 0.4153 |
| 28  | 31 | 2 | 0.29 | 0.04538 | 0.21341 | 0.3941 |
| 29  | 29 | 1 | 0.28 | 0.0449  | 0.20449 | 0.3834 |
| 30  | 28 | 1 | 0.27 | 0.0444  | 0.19561 | 0.3727 |
| 31  | 27 | 1 | 0.26 | 0.04386 | 0.1868  | 0.3619 |
| 32  | 26 | 1 | 0.25 | 0.0433  | 0.17804 | 0.3511 |
| 33  | 25 | 2 | 0.23 | 0.04208 | 0.16069 | 0.3292 |
| 36  | 23 | 2 | 0.21 | 0.04073 | 0.14359 | 0.3071 |
| 37  | 21 | 1 | 0.2  | 0.04    | 0.13514 | 0.296  |
| 78  | 20 | 1 | 0.19 | 0.03923 | 0.12677 | 0.2848 |
| 79  | 19 | 1 | 0.18 | 0.03842 | 0.11847 | 0.2735 |
| 80  | 18 | 1 | 0.17 | 0.03756 | 0.11025 | 0.2621 |
| 81  | 17 | 1 | 0.16 | 0.03666 | 0.10211 | 0.2507 |
| 82  | 16 | 1 | 0.15 | 0.03571 | 0.09407 | 0.2392 |
| 93  | 15 | 1 | 0.14 | 0.0347  | 0.08613 | 0.2276 |
| 129 | 14 | 1 | 0.13 | 0.03363 | 0.0783  | 0.2158 |
| 130 | 13 | 1 | 0.12 | 0.0325  | 0.07058 | 0.204  |
| 131 | 12 | 1 | 0.11 | 0.03129 | 0.06299 | 0.1921 |
| 132 | 11 | 1 | 0.1  | 0.03    | 0.05554 | 0.18   |
| 133 | 10 | 1 | 0.09 | 0.02862 | 0.04826 | 0.1678 |
| 134 | 9  | 1 | 0.08 | 0.02713 | 0.04116 | 0.1555 |
| 135 | 8  | 1 | 0.07 | 0.02551 | 0.03426 | 0.143  |
| 136 | 7  | 1 | 0.06 | 0.02375 | 0.02762 | 0.1303 |
| 137 | 6  | 1 | 0.05 | 0.02179 | 0.02128 | 0.1175 |
| 138 | 5  | 1 | 0.04 | 0.0196  | 0.01531 | 0.1045 |
| 139 | 4  | 1 | 0.03 | 0.01706 | 0.00984 | 0.0914 |
| 140 | 3  | 1 | 0.02 | 0.014   | 0.00507 | 0.0789 |
| 141 | 2  | 1 | 0.01 | 0.00995 | 0.00142 | 0.0703 |
| 142 | 1  | 1 | 0    | NaN     | NA      | NA     |

**Table S133.** Kula station Kaplan-Meier drought risk estimates according to SPI-3, 6, and 12

| Drought Risk (SPI3) |              | Drought Risk (SPI6) |              | Drought Risk (SPI12) |              |
|---------------------|--------------|---------------------|--------------|----------------------|--------------|
| Time                | Drought Risk | Time                | Drought Risk | Time                 | Drought Risk |
| 1                   | 0.04237      | 1                   | 0.03226      | 1                    | 0.03         |
| 2                   | 0.08475      | 2                   | 0.08871      | 2                    | 0.09         |

|    |         |    |         |     |      |
|----|---------|----|---------|-----|------|
| 3  | 0.13559 | 3  | 0.1371  | 3   | 0.14 |
| 4  | 0.16102 | 4  | 0.15323 | 4   | 0.19 |
| 5  | 0.24576 | 5  | 0.16935 | 5   | 0.21 |
| 6  | 0.34746 | 6  | 0.22581 | 6   | 0.23 |
| 7  | 0.45763 | 7  | 0.28226 | 7   | 0.25 |
| 8  | 0.51695 | 8  | 0.33871 | 8   | 0.27 |
| 9  | 0.5678  | 9  | 0.39516 | 9   | 0.28 |
| 10 | 0.62712 | 10 | 0.45161 | 10  | 0.3  |
| 11 | 0.68644 | 11 | 0.5     | 11  | 0.32 |
| 12 | 0.71186 | 12 | 0.53226 | 12  | 0.35 |
| 13 | 0.75424 | 13 | 0.54839 | 13  | 0.38 |
| 14 | 0.78814 | 14 | 0.56452 | 14  | 0.42 |
| 15 | 0.80508 | 15 | 0.58871 | 15  | 0.46 |
| 17 | 0.82203 | 16 | 0.60484 | 16  | 0.5  |
| 18 | 0.83898 | 17 | 0.62903 | 17  | 0.52 |
| 19 | 0.84746 | 18 | 0.64516 | 18  | 0.54 |
| 20 | 0.87288 | 19 | 0.66129 | 19  | 0.56 |
| 21 | 0.88136 | 22 | 0.66935 | 20  | 0.58 |
| 22 | 0.90678 | 23 | 0.68548 | 21  | 0.59 |
| 23 | 0.92373 | 24 | 0.70968 | 22  | 0.61 |
| 24 | 0.94915 | 25 | 0.74194 | 23  | 0.63 |
| 25 | 0.97458 | 26 | 0.76613 | 24  | 0.65 |
| 26 | 0.98305 | 27 | 0.78226 | 25  | 0.66 |
| 29 | 0.99153 | 28 | 0.79839 | 26  | 0.67 |
| 49 | 1       | 31 | 0.80645 | 27  | 0.69 |
|    |         | 32 | 0.83065 | 28  | 0.71 |
|    |         | 33 | 0.85484 | 29  | 0.72 |
|    |         | 34 | 0.87903 | 30  | 0.73 |
|    |         | 35 | 0.90323 | 31  | 0.74 |
|    |         | 36 | 0.92742 | 32  | 0.75 |
|    |         | 37 | 0.94355 | 33  | 0.77 |
|    |         | 38 | 0.96774 | 36  | 0.79 |
|    |         | 39 | 0.98387 | 37  | 0.8  |
|    |         | 40 | 0.99194 | 78  | 0.81 |
|    |         | 49 | 1       | 79  | 0.82 |
|    |         |    |         | 80  | 0.83 |
|    |         |    |         | 81  | 0.84 |
|    |         |    |         | 82  | 0.85 |
|    |         |    |         | 93  | 0.86 |
|    |         |    |         | 129 | 0.87 |
|    |         |    |         | 130 | 0.88 |
|    |         |    |         | 131 | 0.89 |
|    |         |    |         | 132 | 0.9  |
|    |         |    |         | 133 | 0.91 |
|    |         |    |         | 134 | 0.92 |

|     |      |
|-----|------|
| 135 | 0.93 |
| 136 | 0.94 |
| 137 | 0.95 |
| 138 | 0.96 |
| 139 | 0.97 |
| 140 | 0.98 |
| 141 | 0.99 |
| 142 | 1    |

**Table S134.** Kula station Kaplan-Meier survival estimates according to SPEI-3

| Kaplan-Meier Wet to Dry (SPEI3) |        |         |          |         |              |              |
|---------------------------------|--------|---------|----------|---------|--------------|--------------|
|                                 |        | n       | events   | median  | 0.95LCL      | 0.95UCL      |
|                                 |        | 61      | 61       | 8       | 7            | 9            |
| time                            | n.risk | n.event | survival | std.err | lower 95% CI | upper 95% CI |
| 1                               | 61     | 2       | 0.9672   | 0.0228  | 0.92354      | 1.000        |
| 2                               | 59     | 2       | 0.9344   | 0.0317  | 0.87433      | 0.999        |
| 3                               | 57     | 5       | 0.8525   | 0.0454  | 0.76795      | 0.946        |
| 4                               | 52     | 5       | 0.7705   | 0.0538  | 0.67187      | 0.884        |
| 5                               | 47     | 5       | 0.6885   | 0.0593  | 0.58159      | 0.815        |
| 6                               | 42     | 4       | 0.623    | 0.0621  | 0.51247      | 0.757        |
| 7                               | 38     | 6       | 0.5246   | 0.0639  | 0.41311      | 0.666        |
| 8                               | 32     | 6       | 0.4262   | 0.0633  | 0.31856      | 0.57         |
| 9                               | 26     | 6       | 0.3279   | 0.0601  | 0.22891      | 0.47         |
| 10                              | 20     | 4       | 0.2623   | 0.0563  | 0.17219      | 0.4          |
| 11                              | 16     | 2       | 0.2295   | 0.0538  | 0.14491      | 0.363        |
| 17                              | 14     | 1       | 0.2131   | 0.0524  | 0.13158      | 0.345        |
| 18                              | 13     | 2       | 0.1803   | 0.0492  | 0.10561      | 0.308        |
| 19                              | 11     | 1       | 0.1639   | 0.0474  | 0.09301      | 0.289        |
| 20                              | 10     | 1       | 0.1475   | 0.0454  | 0.08071      | 0.27         |
| 21                              | 9      | 1       | 0.1311   | 0.0432  | 0.06875      | 0.25         |
| 22                              | 8      | 2       | 0.0984   | 0.0381  | 0.04601      | 0.21         |
| 23                              | 6      | 2       | 0.0656   | 0.0317  | 0.02543      | 0.169        |
| 24                              | 4      | 2       | 0.0328   | 0.0228  | 0.00839      | 0.128        |
| 47                              | 2      | 1       | 0.0164   | 0.0163  | 0.00235      | 0.115        |
| 48                              | 1      | 1       | 0        | NaN     | NA           | NA           |

**Table S135.** Kula station Kaplan-Meier survival estimates according to SPEI-6

| Kaplan-Meier Wet to Dry (SPEI6) |        |         |          |         |              |              |
|---------------------------------|--------|---------|----------|---------|--------------|--------------|
|                                 |        | n       | events   | median  | 0.95LCL      | 0.95UCL      |
|                                 |        | 62      | 62       | 9.5     | 7            | 17           |
| time                            | n.risk | n.event | survival | std.err | lower 95% CI | upper 95% CI |



|    |    |   |        |        |         |       |
|----|----|---|--------|--------|---------|-------|
| 1  | 62 | 2 | 0.9677 | 0.0224 | 0.92475 | 1.000 |
| 2  | 60 | 4 | 0.9032 | 0.0375 | 0.83255 | 0.98  |
| 3  | 56 | 3 | 0.8548 | 0.0447 | 0.7715  | 0.947 |
| 4  | 53 | 2 | 0.8226 | 0.0485 | 0.73278 | 0.923 |
| 5  | 51 | 3 | 0.7742 | 0.0531 | 0.67681 | 0.886 |
| 6  | 48 | 5 | 0.6935 | 0.0585 | 0.58778 | 0.818 |
| 7  | 43 | 6 | 0.5968 | 0.0623 | 0.48635 | 0.732 |
| 8  | 37 | 4 | 0.5323 | 0.0634 | 0.42149 | 0.672 |
| 9  | 33 | 2 | 0.5    | 0.0635 | 0.38982 | 0.641 |
| 10 | 31 | 3 | 0.4516 | 0.0632 | 0.34328 | 0.594 |
| 11 | 28 | 1 | 0.4355 | 0.063  | 0.32801 | 0.578 |
| 12 | 27 | 1 | 0.4194 | 0.0627 | 0.31288 | 0.562 |
| 13 | 26 | 1 | 0.4032 | 0.0623 | 0.29788 | 0.546 |
| 16 | 25 | 1 | 0.3871 | 0.0619 | 0.283   | 0.529 |
| 17 | 24 | 2 | 0.3548 | 0.0608 | 0.25367 | 0.496 |
| 18 | 22 | 2 | 0.3226 | 0.0594 | 0.2249  | 0.463 |
| 19 | 20 | 2 | 0.2903 | 0.0576 | 0.19673 | 0.428 |
| 21 | 18 | 1 | 0.2742 | 0.0567 | 0.18288 | 0.411 |
| 22 | 17 | 1 | 0.2581 | 0.0556 | 0.16921 | 0.394 |
| 23 | 16 | 2 | 0.2258 | 0.0531 | 0.14242 | 0.358 |
| 24 | 14 | 2 | 0.1935 | 0.0502 | 0.11645 | 0.322 |
| 25 | 12 | 2 | 0.1613 | 0.0467 | 0.09143 | 0.285 |
| 26 | 10 | 1 | 0.1452 | 0.0447 | 0.07934 | 0.266 |
| 27 | 9  | 2 | 0.1129 | 0.0402 | 0.05619 | 0.227 |
| 28 | 7  | 2 | 0.0806 | 0.0346 | 0.0348  | 0.187 |
| 29 | 5  | 1 | 0.0645 | 0.0312 | 0.025   | 0.166 |
| 36 | 4  | 1 | 0.0484 | 0.0273 | 0.01604 | 0.146 |
| 37 | 3  | 1 | 0.0323 | 0.0224 | 0.00825 | 0.126 |
| 62 | 2  | 1 | 0.0161 | 0.016  | 0.00231 | 0.113 |
| 63 | 1  | 1 | 0      | NaN    | NA      | NA    |

**Table S136.** Kula station Kaplan-Meier survival estimates according to SPEI-12

| Kaplan-Meier Wet to Dry (SPEI12) |        |         |          |         |              |              |
|----------------------------------|--------|---------|----------|---------|--------------|--------------|
|                                  |        | n       | events   | median  | 0.95LCL      | 0.95UCL      |
|                                  |        | 46      | 46       | 13.5    | 9            | 21           |
| time                             | n.risk | n.event | survival | std.err | lower 95% CI | upper 95% CI |
| 1                                | 46     | 1       | 0.9783   | 0.0215  | 0.93701      | 1.000        |
| 2                                | 45     | 2       | 0.9348   | 0.0364  | 0.86609      | 1.000        |
| 3                                | 43     | 3       | 0.8696   | 0.0497  | 0.77749      | 0.973        |
| 4                                | 40     | 3       | 0.8043   | 0.0585  | 0.6975       | 0.928        |
| 5                                | 37     | 2       | 0.7609   | 0.0629  | 0.64707      | 0.895        |
| 6                                | 35     | 2       | 0.7174   | 0.0664  | 0.59839      | 0.86         |
| 7                                | 33     | 2       | 0.6739   | 0.0691  | 0.55119      | 0.824        |

|    |    |   |        |        |         |       |
|----|----|---|--------|--------|---------|-------|
| 8  | 31 | 2 | 0.6304 | 0.0712 | 0.5053  | 0.787 |
| 9  | 29 | 1 | 0.6087 | 0.072  | 0.48281 | 0.767 |
| 10 | 28 | 1 | 0.587  | 0.0726 | 0.4606  | 0.748 |
| 11 | 27 | 2 | 0.5435 | 0.0734 | 0.41702 | 0.708 |
| 12 | 25 | 1 | 0.5217 | 0.0737 | 0.39563 | 0.688 |
| 13 | 24 | 1 | 0.5    | 0.0737 | 0.37451 | 0.668 |
| 14 | 23 | 1 | 0.4783 | 0.0737 | 0.35366 | 0.647 |
| 15 | 22 | 1 | 0.4565 | 0.0734 | 0.33306 | 0.626 |
| 16 | 21 | 1 | 0.4348 | 0.0731 | 0.31274 | 0.604 |
| 17 | 20 | 1 | 0.413  | 0.0726 | 0.29268 | 0.583 |
| 18 | 19 | 1 | 0.3913 | 0.072  | 0.27289 | 0.561 |
| 19 | 18 | 1 | 0.3696 | 0.0712 | 0.25338 | 0.539 |
| 20 | 17 | 1 | 0.3478 | 0.0702 | 0.23416 | 0.517 |
| 21 | 16 | 2 | 0.3043 | 0.0678 | 0.19662 | 0.471 |
| 22 | 14 | 1 | 0.2826 | 0.0664 | 0.17833 | 0.448 |
| 23 | 13 | 1 | 0.2609 | 0.0647 | 0.16039 | 0.424 |
| 24 | 12 | 1 | 0.2391 | 0.0629 | 0.14281 | 0.4   |
| 27 | 11 | 1 | 0.2174 | 0.0608 | 0.12564 | 0.376 |
| 28 | 10 | 1 | 0.1957 | 0.0585 | 0.1089  | 0.352 |
| 42 | 9  | 1 | 0.1739 | 0.0559 | 0.09264 | 0.326 |
| 43 | 8  | 1 | 0.1522 | 0.053  | 0.07693 | 0.301 |
| 44 | 7  | 1 | 0.1304 | 0.0497 | 0.06185 | 0.275 |
| 45 | 6  | 1 | 0.1087 | 0.0459 | 0.04751 | 0.249 |
| 46 | 5  | 1 | 0.087  | 0.0415 | 0.03409 | 0.222 |
| 61 | 4  | 1 | 0.0652 | 0.0364 | 0.02184 | 0.195 |
| 62 | 3  | 1 | 0.0435 | 0.0301 | 0.01121 | 0.169 |
| 63 | 2  | 1 | 0.0217 | 0.0215 | 0.00313 | 0.151 |
| 87 | 1  | 1 | 0      | NaN    | NA      | NA    |

**Table S137.** Kula station Kaplan-Meier drought risk estimates according to SPEI-3, 6, and 12

| Drought Risk (SPEI3) |              | Drought Risk (SPEI6) |              | Drought Risk (SPEI12) |              |
|----------------------|--------------|----------------------|--------------|-----------------------|--------------|
| Time                 | Drought Risk | Time                 | Drought Risk | Time                  | Drought Risk |
| 1                    | 0.0328       | 1                    | 0.0323       | 1                     | 0.0217       |
| 2                    | 0.0656       | 2                    | 0.0968       | 2                     | 0.0652       |
| 3                    | 0.1475       | 3                    | 0.1452       | 3                     | 0.1304       |
| 4                    | 0.2295       | 4                    | 0.1774       | 4                     | 0.1957       |
| 5                    | 0.3115       | 5                    | 0.2258       | 5                     | 0.2391       |
| 6                    | 0.377        | 6                    | 0.3065       | 6                     | 0.2826       |
| 7                    | 0.4754       | 7                    | 0.4032       | 7                     | 0.3261       |
| 8                    | 0.5738       | 8                    | 0.4677       | 8                     | 0.3696       |
| 9                    | 0.6721       | 9                    | 0.5          | 9                     | 0.3913       |
| 10                   | 0.7377       | 10                   | 0.5484       | 10                    | 0.413        |
| 11                   | 0.7705       | 11                   | 0.5645       | 11                    | 0.4565       |
| 12                   | 0.773233     | 12                   | 0.5806       | 12                    | 0.4783       |

|    |        |    |        |    |        |
|----|--------|----|--------|----|--------|
| 17 | 0.7869 | 13 | 0.5968 | 13 | 0.5    |
| 18 | 0.8197 | 16 | 0.6129 | 14 | 0.5217 |
| 19 | 0.8361 | 17 | 0.6452 | 15 | 0.5435 |
| 20 | 0.8525 | 18 | 0.6774 | 16 | 0.5652 |
| 21 | 0.8689 | 19 | 0.7097 | 17 | 0.587  |
| 22 | 0.9016 | 21 | 0.7258 | 18 | 0.6087 |
| 23 | 0.9344 | 22 | 0.7419 | 19 | 0.6304 |
| 24 | 0.9672 | 23 | 0.7742 | 20 | 0.6522 |
| 47 | 0.9836 | 24 | 0.8065 | 21 | 0.6957 |
| 48 | 1      | 25 | 0.8387 | 22 | 0.7174 |
|    |        | 26 | 0.8548 | 23 | 0.7391 |
|    |        | 27 | 0.8871 | 24 | 0.7609 |
|    |        | 28 | 0.9194 | 27 | 0.7826 |
|    |        | 29 | 0.9355 | 28 | 0.8043 |
|    |        | 36 | 0.9516 | 42 | 0.8261 |
|    |        | 37 | 0.9677 | 43 | 0.8478 |
|    |        | 62 | 0.9839 | 44 | 0.8696 |
|    |        | 63 | 1      | 45 | 0.8913 |
|    |        |    |        | 46 | 0.913  |
|    |        |    |        | 61 | 0.9348 |
|    |        |    |        | 62 | 0.9565 |
|    |        |    |        | 63 | 0.9783 |
|    |        |    |        | 87 | 1      |

**Table S138.** Manisa station Kaplan-Meier survival estimates according to SPI-3

| Kaplan-Meier Wet to Dry (SPI3) |        |         |          |         |              |              |
|--------------------------------|--------|---------|----------|---------|--------------|--------------|
|                                |        | n       | events   | median  | 0.95LCL      | 0.95UCL      |
|                                |        | 148     | 148      | 9       | 8            | 11           |
| time                           | n.risk | n.event | survival | std.err | lower 95% CL | upper 95% CL |
| 1                              | 148    | 7       | 0.9527   | 0.01745 | 0.91911      | 0.9875       |
| 2                              | 141    | 9       | 0.89189  | 0.02552 | 0.843242     | 0.9433       |
| 3                              | 132    | 13      | 0.80405  | 0.03263 | 0.742583     | 0.8706       |
| 4                              | 119    | 11      | 0.72973  | 0.0365  | 0.661577     | 0.8049       |
| 5                              | 108    | 9       | 0.66892  | 0.03868 | 0.59724      | 0.7492       |
| 6                              | 99     | 3       | 0.64865  | 0.03924 | 0.576122     | 0.7303       |
| 7                              | 96     | 7       | 0.60135  | 0.04025 | 0.527424     | 0.6856       |
| 8                              | 89     | 8       | 0.5473   | 0.04092 | 0.472703     | 0.6337       |
| 9                              | 81     | 8       | 0.49324  | 0.0411  | 0.418929     | 0.5807       |
| 10                             | 73     | 10      | 0.42568  | 0.04064 | 0.353026     | 0.5133       |
| 11                             | 63     | 8       | 0.37162  | 0.03972 | 0.301382     | 0.4582       |
| 12                             | 55     | 2       | 0.35811  | 0.03941 | 0.288628     | 0.4443       |
| 13                             | 53     | 3       | 0.33784  | 0.03888 | 0.26962      | 0.4233       |
| 14                             | 50     | 2       | 0.32432  | 0.03848 | 0.257033     | 0.4092       |
| 15                             | 48     | 7       | 0.27703  | 0.03679 | 0.213545     | 0.3594       |

|    |    |   |         |         |          |        |
|----|----|---|---------|---------|----------|--------|
| 16 | 41 | 8 | 0.22297 | 0.03421 | 0.165058 | 0.3012 |
| 17 | 33 | 4 | 0.19595 | 0.03263 | 0.141384 | 0.2716 |
| 18 | 29 | 5 | 0.16216 | 0.0303  | 0.112437 | 0.2339 |
| 19 | 24 | 3 | 0.14189 | 0.02868 | 0.095476 | 0.2109 |
| 21 | 21 | 1 | 0.13514 | 0.0281  | 0.0899   | 0.2031 |
| 22 | 20 | 2 | 0.12162 | 0.02687 | 0.078882 | 0.1875 |
| 23 | 18 | 2 | 0.10811 | 0.02552 | 0.06806  | 0.1717 |
| 24 | 16 | 2 | 0.09459 | 0.02406 | 0.057465 | 0.1557 |
| 25 | 14 | 2 | 0.08108 | 0.02244 | 0.047138 | 0.1395 |
| 26 | 12 | 5 | 0.0473  | 0.01745 | 0.022952 | 0.0975 |
| 27 | 7  | 2 | 0.03378 | 0.01485 | 0.014273 | 0.08   |
| 28 | 5  | 2 | 0.02027 | 0.01158 | 0.006613 | 0.0621 |
| 29 | 3  | 1 | 0.01351 | 0.00949 | 0.003412 | 0.0535 |
| 30 | 2  | 1 | 0.00676 | 0.00673 | 0.000958 | 0.0476 |
| 37 | 1  | 1 | 0       | NaN     | NA       | NA     |

**Table S139.** Manisa station Kaplan-Meier survival estimates according to SPI-6

| Kaplan-Meier Wet to Dry (SPI6) |        |         |          |         |              |              |
|--------------------------------|--------|---------|----------|---------|--------------|--------------|
|                                |        | n       | events   | median  | 0.95LCL      | 0.95UCL      |
|                                |        | 155     | 155      | 11      | 9            | 16           |
| time                           | n.risk | n.event | survival | std.err | lower 95% CL | upper 95% CL |
| 1                              | 155    | 7       | 0.95484  | 0.01668 | 0.922701     | 0.9881       |
| 2                              | 148    | 9       | 0.89677  | 0.02444 | 0.850133     | 0.946        |
| 3                              | 139    | 9       | 0.83871  | 0.02954 | 0.782761     | 0.8987       |
| 4                              | 130    | 7       | 0.79355  | 0.03251 | 0.732319     | 0.8599       |
| 5                              | 123    | 7       | 0.74839  | 0.03485 | 0.683098     | 0.8199       |
| 6                              | 116    | 10      | 0.68387  | 0.03735 | 0.614454     | 0.7611       |
| 7                              | 106    | 7       | 0.63871  | 0.03858 | 0.567391     | 0.719        |
| 8                              | 99     | 6       | 0.6      | 0.03935 | 0.527627     | 0.6823       |
| 9                              | 93     | 6       | 0.56129  | 0.03986 | 0.488363     | 0.6451       |
| 10                             | 87     | 9       | 0.50323  | 0.04016 | 0.430361     | 0.5884       |
| 11                             | 78     | 5       | 0.47097  | 0.04009 | 0.398592     | 0.5565       |
| 12                             | 73     | 2       | 0.45806  | 0.04002 | 0.385976     | 0.5436       |
| 13                             | 71     | 3       | 0.43871  | 0.03986 | 0.36715      | 0.5242       |
| 14                             | 68     | 1       | 0.43226  | 0.03979 | 0.3609       | 0.5177       |
| 15                             | 67     | 1       | 0.42581  | 0.03972 | 0.354665     | 0.5112       |
| 16                             | 66     | 3       | 0.40645  | 0.03945 | 0.336038     | 0.4916       |
| 17                             | 63     | 3       | 0.3871   | 0.03912 | 0.317533     | 0.4719       |
| 19                             | 60     | 1       | 0.38065  | 0.039   | 0.311393     | 0.4653       |
| 20                             | 59     | 2       | 0.36774  | 0.03873 | 0.299154     | 0.4521       |
| 21                             | 57     | 1       | 0.36129  | 0.03858 | 0.293056     | 0.4454       |
| 22                             | 56     | 2       | 0.34839  | 0.03827 | 0.280904     | 0.4321       |
| 23                             | 54     | 2       | 0.33548  | 0.03792 | 0.268811     | 0.4187       |
| 24                             | 52     | 3       | 0.31613  | 0.03735 | 0.250787     | 0.3985       |

|    |    |   |         |         |          |        |
|----|----|---|---------|---------|----------|--------|
| 25 | 49 | 4 | 0.29032 | 0.03646 | 0.226979 | 0.3713 |
| 26 | 45 | 2 | 0.27742 | 0.03596 | 0.215176 | 0.3577 |
| 27 | 43 | 2 | 0.26452 | 0.03543 | 0.203445 | 0.3439 |
| 28 | 41 | 2 | 0.25161 | 0.03485 | 0.191787 | 0.3301 |
| 29 | 39 | 4 | 0.22581 | 0.03358 | 0.168709 | 0.3022 |
| 30 | 35 | 4 | 0.2     | 0.03213 | 0.145979 | 0.274  |
| 31 | 31 | 2 | 0.1871  | 0.03132 | 0.134758 | 0.2598 |
| 32 | 29 | 2 | 0.17419 | 0.03046 | 0.123643 | 0.2454 |
| 33 | 27 | 2 | 0.16129 | 0.02954 | 0.112642 | 0.2309 |
| 34 | 25 | 2 | 0.14839 | 0.02855 | 0.101767 | 0.2164 |
| 35 | 23 | 3 | 0.12903 | 0.02693 | 0.085717 | 0.1942 |
| 36 | 20 | 2 | 0.11613 | 0.02573 | 0.075218 | 0.1793 |
| 37 | 18 | 4 | 0.09032 | 0.02302 | 0.054805 | 0.1489 |
| 38 | 14 | 3 | 0.07097 | 0.02062 | 0.04015  | 0.1254 |
| 39 | 11 | 3 | 0.05161 | 0.01777 | 0.026283 | 0.1014 |
| 40 | 8  | 3 | 0.03226 | 0.01419 | 0.013619 | 0.0764 |
| 41 | 5  | 3 | 0.0129  | 0.00906 | 0.003256 | 0.0511 |
| 42 | 2  | 1 | 0.00645 | 0.00643 | 0.000915 | 0.0455 |
| 52 | 1  | 1 | 0       | NaN     | NA       | NA     |

**Table S140.** Manisa station Kaplan-Meier survival estimates according to SPI-12

| Kaplan-Meier Wet to Dry (SPI12) |        |         |          |         |              |              |
|---------------------------------|--------|---------|----------|---------|--------------|--------------|
|                                 |        | n       | events   | median  | 0.95LCL      | 0.95UCL      |
|                                 |        | 158     | 158      | 15      | 13           | 21           |
| time                            | n.risk | n.event | survival | std.err | lower 95% CL | upper 95% CL |
| 1                               | 158    | 6       | 0.96203  | 0.01521 | 0.932679     | 0.9923       |
| 2                               | 152    | 7       | 0.91772  | 0.02186 | 0.87586      | 0.9616       |
| 3                               | 145    | 7       | 0.87342  | 0.02645 | 0.82308      | 0.9268       |
| 4                               | 138    | 7       | 0.82911  | 0.02995 | 0.772451     | 0.8899       |
| 5                               | 131    | 6       | 0.79114  | 0.03234 | 0.730229     | 0.8571       |
| 6                               | 125    | 5       | 0.75949  | 0.034   | 0.695692     | 0.8291       |
| 7                               | 120    | 4       | 0.73418  | 0.03515 | 0.668426     | 0.8064       |
| 8                               | 116    | 4       | 0.70886  | 0.03614 | 0.64145      | 0.7834       |
| 9                               | 112    | 3       | 0.68987  | 0.0368  | 0.621392     | 0.7659       |
| 10                              | 109    | 4       | 0.66456  | 0.03756 | 0.594868     | 0.7424       |
| 11                              | 105    | 5       | 0.63291  | 0.03835 | 0.562044     | 0.7127       |
| 12                              | 100    | 7       | 0.58861  | 0.03915 | 0.516669     | 0.6706       |
| 13                              | 93     | 6       | 0.55063  | 0.03957 | 0.478286     | 0.6339       |
| 14                              | 87     | 5       | 0.51899  | 0.03975 | 0.446646     | 0.603        |
| 15                              | 82     | 4       | 0.49367  | 0.03977 | 0.421558     | 0.5781       |
| 16                              | 78     | 4       | 0.46835  | 0.0397  | 0.396667     | 0.553        |
| 17                              | 74     | 2       | 0.4557   | 0.03962 | 0.384296     | 0.5404       |
| 18                              | 72     | 2       | 0.44304  | 0.03952 | 0.371975     | 0.5277       |
| 19                              | 70     | 2       | 0.43038  | 0.03939 | 0.359704     | 0.5149       |

|     |    |   |         |         |          |        |
|-----|----|---|---------|---------|----------|--------|
| 20  | 68 | 2 | 0.41772 | 0.03924 | 0.347485 | 0.5022 |
| 21  | 66 | 1 | 0.41139 | 0.03915 | 0.341394 | 0.4957 |
| 23  | 65 | 1 | 0.40506 | 0.03905 | 0.335316 | 0.4893 |
| 24  | 64 | 2 | 0.39241 | 0.03885 | 0.323199 | 0.4764 |
| 25  | 62 | 2 | 0.37975 | 0.03861 | 0.311135 | 0.4635 |
| 26  | 60 | 3 | 0.36076 | 0.0382  | 0.29314  | 0.444  |
| 27  | 57 | 2 | 0.3481  | 0.0379  | 0.281213 | 0.4309 |
| 28  | 55 | 2 | 0.33544 | 0.03756 | 0.269342 | 0.4178 |
| 29  | 53 | 2 | 0.32278 | 0.0372  | 0.257529 | 0.4046 |
| 30  | 51 | 3 | 0.3038  | 0.03659 | 0.239923 | 0.3847 |
| 31  | 48 | 3 | 0.28481 | 0.03591 | 0.222457 | 0.3646 |
| 32  | 45 | 3 | 0.26582 | 0.03515 | 0.205141 | 0.3445 |
| 33  | 42 | 2 | 0.25316 | 0.03459 | 0.193684 | 0.3309 |
| 34  | 40 | 1 | 0.24684 | 0.0343  | 0.187983 | 0.3241 |
| 35  | 39 | 2 | 0.23418 | 0.03369 | 0.176638 | 0.3105 |
| 36  | 37 | 2 | 0.22152 | 0.03304 | 0.165373 | 0.2967 |
| 37  | 35 | 2 | 0.20886 | 0.03234 | 0.154192 | 0.2829 |
| 38  | 33 | 1 | 0.20253 | 0.03197 | 0.148634 | 0.276  |
| 39  | 32 | 1 | 0.1962  | 0.03159 | 0.1431   | 0.269  |
| 40  | 31 | 1 | 0.18987 | 0.0312  | 0.13759  | 0.262  |
| 41  | 30 | 1 | 0.18354 | 0.0308  | 0.132104 | 0.255  |
| 42  | 29 | 1 | 0.17722 | 0.03038 | 0.126645 | 0.248  |
| 43  | 28 | 1 | 0.17089 | 0.02995 | 0.121212 | 0.2409 |
| 44  | 27 | 1 | 0.16456 | 0.0295  | 0.115807 | 0.2338 |
| 45  | 26 | 1 | 0.15823 | 0.02903 | 0.110431 | 0.2267 |
| 59  | 25 | 1 | 0.1519  | 0.02855 | 0.105086 | 0.2196 |
| 64  | 24 | 1 | 0.14557 | 0.02806 | 0.099772 | 0.2124 |
| 65  | 23 | 1 | 0.13924 | 0.02754 | 0.094492 | 0.2052 |
| 71  | 22 | 1 | 0.13291 | 0.02701 | 0.089248 | 0.1979 |
| 72  | 21 | 1 | 0.12658 | 0.02645 | 0.084041 | 0.1907 |
| 96  | 20 | 1 | 0.12025 | 0.02588 | 0.078874 | 0.1833 |
| 97  | 19 | 1 | 0.11392 | 0.02528 | 0.073749 | 0.176  |
| 98  | 18 | 1 | 0.10759 | 0.02465 | 0.06867  | 0.1686 |
| 99  | 17 | 1 | 0.10127 | 0.024   | 0.063639 | 0.1611 |
| 100 | 16 | 1 | 0.09494 | 0.02332 | 0.058661 | 0.1536 |
| 101 | 15 | 1 | 0.08861 | 0.02261 | 0.053739 | 0.1461 |
| 102 | 14 | 1 | 0.08228 | 0.02186 | 0.048879 | 0.1385 |
| 103 | 13 | 1 | 0.07595 | 0.02108 | 0.044088 | 0.1308 |
| 104 | 12 | 1 | 0.06962 | 0.02025 | 0.039372 | 0.1231 |
| 116 | 11 | 1 | 0.06329 | 0.01937 | 0.03474  | 0.1153 |
| 117 | 10 | 1 | 0.05696 | 0.01844 | 0.030203 | 0.1074 |
| 118 | 9  | 1 | 0.05063 | 0.01744 | 0.025775 | 0.0995 |
| 145 | 8  | 1 | 0.0443  | 0.01637 | 0.021475 | 0.0914 |
| 146 | 7  | 1 | 0.03797 | 0.01521 | 0.017324 | 0.0832 |
| 147 | 6  | 1 | 0.03165 | 0.01393 | 0.013357 | 0.075  |

|     |   |   |         |         |          |        |
|-----|---|---|---------|---------|----------|--------|
| 148 | 5 | 1 | 0.02532 | 0.0125  | 0.009621 | 0.0666 |
| 149 | 4 | 1 | 0.01899 | 0.01086 | 0.00619  | 0.0582 |
| 150 | 3 | 1 | 0.01266 | 0.00889 | 0.003194 | 0.0502 |
| 151 | 2 | 1 | 0.00633 | 0.00631 | 0.000897 | 0.0447 |
| 152 | 1 | 1 | 0       | NaN     | NA       | NA     |

**Table S141.** Manisa station Kaplan-Meier drought risk estimates according to SPI-3, 6, and 12

| Drought Risk (SPI3) |              | Drought Risk (SPI6) |              | Drought Risk (SPI12) |              |
|---------------------|--------------|---------------------|--------------|----------------------|--------------|
| Time                | Drought Risk | Time                | Drought Risk | Time                 | Drought Risk |
| 1                   | 0.0473       | 1                   | 0.04516      | 1                    | 0.03797      |
| 2                   | 0.10811      | 2                   | 0.10323      | 2                    | 0.08228      |
| 3                   | 0.19595      | 3                   | 0.16129      | 3                    | 0.12658      |
| 4                   | 0.27027      | 4                   | 0.20645      | 4                    | 0.17089      |
| 5                   | 0.33108      | 5                   | 0.25161      | 5                    | 0.20886      |
| 6                   | 0.35135      | 6                   | 0.31613      | 6                    | 0.24051      |
| 7                   | 0.39865      | 7                   | 0.36129      | 7                    | 0.26582      |
| 8                   | 0.4527       | 8                   | 0.4          | 8                    | 0.29114      |
| 9                   | 0.50676      | 9                   | 0.43871      | 9                    | 0.31013      |
| 10                  | 0.57432      | 10                  | 0.49677      | 10                   | 0.33544      |
| 11                  | 0.62838      | 11                  | 0.52903      | 11                   | 0.36709      |
| 12                  | 0.64189      | 12                  | 0.54194      | 12                   | 0.41139      |
| 13                  | 0.66216      | 13                  | 0.56129      | 13                   | 0.44937      |
| 14                  | 0.67568      | 14                  | 0.56774      | 14                   | 0.48101      |
| 15                  | 0.72297      | 15                  | 0.57419      | 15                   | 0.50633      |
| 16                  | 0.77703      | 16                  | 0.59355      | 16                   | 0.53165      |
| 17                  | 0.80405      | 17                  | 0.6129       | 17                   | 0.5443       |
| 18                  | 0.83784      | 19                  | 0.61935      | 18                   | 0.55696      |
| 19                  | 0.85811      | 20                  | 0.63226      | 19                   | 0.56962      |
| 21                  | 0.86486      | 21                  | 0.63871      | 20                   | 0.58228      |
| 22                  | 0.87838      | 22                  | 0.65161      | 21                   | 0.58861      |
| 23                  | 0.89189      | 23                  | 0.66452      | 23                   | 0.59494      |
| 24                  | 0.90541      | 24                  | 0.68387      | 24                   | 0.60759      |
| 25                  | 0.91892      | 25                  | 0.70968      | 25                   | 0.62025      |
| 26                  | 0.9527       | 26                  | 0.72258      | 26                   | 0.63924      |
| 27                  | 0.96622      | 27                  | 0.73548      | 27                   | 0.6519       |
| 28                  | 0.97973      | 28                  | 0.74839      | 28                   | 0.66456      |
| 29                  | 0.98649      | 29                  | 0.77419      | 29                   | 0.67722      |
| 30                  | 0.99324      | 30                  | 0.8          | 30                   | 0.6962       |
| 37                  | 1            | 31                  | 0.8129       | 31                   | 0.71519      |
|                     |              | 32                  | 0.82581      | 32                   | 0.73418      |
|                     |              | 33                  | 0.83871      | 33                   | 0.74684      |
|                     |              | 34                  | 0.85161      | 34                   | 0.75316      |
|                     |              | 35                  | 0.87097      | 35                   | 0.76582      |
|                     |              | 36                  | 0.88387      | 36                   | 0.77848      |
|                     |              | 37                  | 0.90968      | 37                   | 0.79114      |

|    |         |     |         |
|----|---------|-----|---------|
| 38 | 0.92903 | 38  | 0.79747 |
| 39 | 0.94839 | 39  | 0.8038  |
| 40 | 0.96774 | 40  | 0.81013 |
| 41 | 0.9871  | 41  | 0.81646 |
| 42 | 0.99355 | 42  | 0.82278 |
| 52 | 1       | 43  | 0.82911 |
|    |         | 44  | 0.83544 |
|    |         | 45  | 0.84177 |
|    |         | 59  | 0.8481  |
|    |         | 64  | 0.85443 |
|    |         | 65  | 0.86076 |
|    |         | 71  | 0.86709 |
|    |         | 72  | 0.87342 |
|    |         | 96  | 0.87975 |
|    |         | 97  | 0.88608 |
|    |         | 98  | 0.89241 |
|    |         | 99  | 0.89873 |
|    |         | 100 | 0.90506 |
|    |         | 101 | 0.91139 |
|    |         | 102 | 0.91772 |
|    |         | 103 | 0.92405 |
|    |         | 104 | 0.93038 |
|    |         | 116 | 0.93671 |
|    |         | 117 | 0.94304 |
|    |         | 118 | 0.94937 |
|    |         | 145 | 0.9557  |
|    |         | 146 | 0.96203 |
|    |         | 147 | 0.96835 |
|    |         | 148 | 0.97468 |
|    |         | 149 | 0.98101 |
|    |         | 150 | 0.98734 |
|    |         | 151 | 0.99367 |
|    |         | 152 | 1       |

**Table S142.** Manisa station Kaplan-Meier survival estimates according to SPEI-3

| Kaplan-Meier Wet to Dry (SPEI3) |        |         |          |         |              |              |
|---------------------------------|--------|---------|----------|---------|--------------|--------------|
|                                 |        | n       | events   | median  | 0.95LCL      | 0.95UCL      |
|                                 |        | 178     | 178      | 8       | 7            | 10           |
| time                            | n.risk | n.event | survival | std.err | lower 95% CI | upper 95% CI |
| 1                               | 178    | 11      | 0.9382   | 0.01805 | 0.903488     | 0.9743       |
| 2                               | 167    | 11      | 0.8764   | 0.02467 | 0.829365     | 0.9261       |
| 3                               | 156    | 17      | 0.7809   | 0.031   | 0.722437     | 0.8441       |
| 4                               | 139    | 16      | 0.69101  | 0.03463 | 0.626357     | 0.7623       |



|    |     |    |         |         |          |        |
|----|-----|----|---------|---------|----------|--------|
| 5  | 123 | 14 | 0.61236 | 0.03652 | 0.54481  | 0.6883 |
| 6  | 109 | 7  | 0.57303 | 0.03707 | 0.504787 | 0.6505 |
| 7  | 102 | 12 | 0.50562 | 0.03747 | 0.437255 | 0.5847 |
| 8  | 90  | 9  | 0.45506 | 0.03732 | 0.387478 | 0.5344 |
| 9  | 81  | 6  | 0.42135 | 0.03701 | 0.354711 | 0.5005 |
| 10 | 75  | 7  | 0.38202 | 0.03642 | 0.316915 | 0.4605 |
| 11 | 68  | 5  | 0.35393 | 0.03584 | 0.290216 | 0.4316 |
| 12 | 63  | 6  | 0.32022 | 0.03497 | 0.258523 | 0.3967 |
| 13 | 57  | 5  | 0.29213 | 0.03408 | 0.232418 | 0.3672 |
| 14 | 52  | 2  | 0.2809  | 0.03369 | 0.22206  | 0.3553 |
| 15 | 50  | 1  | 0.27528 | 0.03348 | 0.216899 | 0.3494 |
| 16 | 49  | 6  | 0.24157 | 0.03208 | 0.18621  | 0.3134 |
| 17 | 43  | 5  | 0.21348 | 0.03071 | 0.161029 | 0.283  |
| 18 | 38  | 7  | 0.17416 | 0.02843 | 0.126477 | 0.2398 |
| 19 | 31  | 4  | 0.15169 | 0.02689 | 0.107168 | 0.2147 |
| 20 | 27  | 2  | 0.14045 | 0.02604 | 0.097653 | 0.202  |
| 21 | 25  | 3  | 0.1236  | 0.02467 | 0.083582 | 0.1828 |
| 22 | 22  | 4  | 0.10112 | 0.0226  | 0.065258 | 0.1567 |
| 23 | 18  | 4  | 0.07865 | 0.02018 | 0.047571 | 0.13   |
| 24 | 14  | 3  | 0.0618  | 0.01805 | 0.034864 | 0.1095 |
| 25 | 11  | 2  | 0.05056 | 0.01642 | 0.026752 | 0.0956 |
| 26 | 9   | 3  | 0.03371 | 0.01353 | 0.015351 | 0.074  |
| 27 | 6   | 2  | 0.02247 | 0.01111 | 0.008528 | 0.0592 |
| 28 | 4   | 1  | 0.01685 | 0.00965 | 0.005488 | 0.0518 |
| 30 | 3   | 1  | 0.01124 | 0.0079  | 0.002832 | 0.0446 |
| 33 | 2   | 1  | 0.00562 | 0.0056  | 0.000796 | 0.0397 |
| 49 | 1   | 1  | 0       | NaN     | NA       | NA     |

**Table S143.** Manisa station Kaplan-Meier survival estimates according to SPEI-6

| Kaplan-Meier Wet to Dry (SPEI6) |        |         |          |         |              |              |
|---------------------------------|--------|---------|----------|---------|--------------|--------------|
|                                 |        | n       | events   | median  | 0.95LCL      | 0.95UCL      |
|                                 |        | 178     | 178      | 15.5    | 13           | 20           |
| time                            | n.risk | n.event | survival | std.err | lower 95% CI | upper 95% CI |
| 1                               | 178    | 8       | 0.95506  | 0.01553 | 0.9251       | 0.986        |
| 2                               | 170    | 14      | 0.8764   | 0.02467 | 0.829365     | 0.9261       |
| 3                               | 156    | 12      | 0.80899  | 0.02946 | 0.753253     | 0.8688       |
| 4                               | 144    | 7       | 0.76966  | 0.03156 | 0.710229     | 0.8341       |
| 5                               | 137    | 4       | 0.74719  | 0.03258 | 0.685994     | 0.8138       |
| 6                               | 133    | 6       | 0.71348  | 0.03389 | 0.65006      | 0.7831       |
| 7                               | 127    | 3       | 0.69663  | 0.03446 | 0.632265     | 0.7675       |
| 8                               | 124    | 2       | 0.68539  | 0.03481 | 0.620461     | 0.7571       |
| 9                               | 122    | 2       | 0.67416  | 0.03513 | 0.608704     | 0.7466       |
| 10                              | 120    | 5       | 0.64607  | 0.03584 | 0.579503     | 0.7203       |

|    |     |   |         |         |          |        |
|----|-----|---|---------|---------|----------|--------|
| 11 | 115 | 6 | 0.61236 | 0.03652 | 0.54481  | 0.6883 |
| 12 | 109 | 6 | 0.57865 | 0.03701 | 0.510476 | 0.6559 |
| 13 | 103 | 4 | 0.55618 | 0.03724 | 0.487778 | 0.6342 |
| 14 | 99  | 5 | 0.52809 | 0.03742 | 0.459618 | 0.6068 |
| 15 | 94  | 5 | 0.5     | 0.03748 | 0.431688 | 0.5791 |
| 16 | 89  | 4 | 0.47753 | 0.03744 | 0.409509 | 0.5568 |
| 17 | 85  | 3 | 0.46067 | 0.03736 | 0.392972 | 0.54   |
| 18 | 82  | 3 | 0.44382 | 0.03724 | 0.376518 | 0.5232 |
| 19 | 79  | 2 | 0.43258 | 0.03713 | 0.365596 | 0.5118 |
| 20 | 77  | 3 | 0.41573 | 0.03694 | 0.349282 | 0.4948 |
| 21 | 74  | 5 | 0.38764 | 0.03652 | 0.322286 | 0.4662 |
| 22 | 69  | 1 | 0.38202 | 0.03642 | 0.316915 | 0.4605 |
| 23 | 68  | 3 | 0.36517 | 0.03609 | 0.300865 | 0.4432 |
| 24 | 65  | 3 | 0.34831 | 0.03571 | 0.284907 | 0.4258 |
| 25 | 62  | 3 | 0.33146 | 0.03528 | 0.269044 | 0.4084 |
| 26 | 59  | 2 | 0.32022 | 0.03497 | 0.258523 | 0.3967 |
| 27 | 57  | 3 | 0.30337 | 0.03446 | 0.242825 | 0.379  |
| 28 | 54  | 3 | 0.28652 | 0.03389 | 0.227233 | 0.3613 |
| 29 | 51  | 3 | 0.26966 | 0.03326 | 0.211751 | 0.3434 |
| 30 | 48  | 4 | 0.24719 | 0.03233 | 0.19129  | 0.3194 |
| 31 | 44  | 2 | 0.23596 | 0.03182 | 0.181143 | 0.3074 |
| 32 | 42  | 3 | 0.2191  | 0.031   | 0.166034 | 0.2891 |
| 33 | 39  | 2 | 0.20787 | 0.03041 | 0.15604  | 0.2769 |
| 34 | 37  | 1 | 0.20225 | 0.03011 | 0.151068 | 0.2708 |
| 35 | 36  | 2 | 0.19101 | 0.02946 | 0.141175 | 0.2584 |
| 37 | 34  | 1 | 0.18539 | 0.02913 | 0.136257 | 0.2522 |
| 38 | 33  | 1 | 0.17978 | 0.02878 | 0.131357 | 0.246  |
| 39 | 32  | 1 | 0.17416 | 0.02843 | 0.126477 | 0.2398 |
| 40 | 31  | 1 | 0.16854 | 0.02806 | 0.121617 | 0.2336 |
| 41 | 30  | 2 | 0.1573  | 0.02729 | 0.111962 | 0.221  |
| 42 | 28  | 2 | 0.14607 | 0.02647 | 0.102398 | 0.2084 |
| 47 | 26  | 1 | 0.14045 | 0.02604 | 0.097653 | 0.202  |
| 48 | 25  | 2 | 0.12921 | 0.02514 | 0.088244 | 0.1892 |
| 49 | 23  | 2 | 0.11798 | 0.02418 | 0.07895  | 0.1763 |
| 50 | 21  | 2 | 0.10674 | 0.02314 | 0.069786 | 0.1633 |
| 51 | 19  | 3 | 0.08989 | 0.02144 | 0.056323 | 0.1435 |
| 52 | 16  | 3 | 0.07303 | 0.0195  | 0.043274 | 0.1233 |
| 53 | 13  | 3 | 0.05618 | 0.01726 | 0.030766 | 0.1026 |
| 54 | 10  | 3 | 0.03933 | 0.01457 | 0.019026 | 0.0813 |
| 55 | 7   | 1 | 0.03371 | 0.01353 | 0.015351 | 0.074  |
| 56 | 6   | 1 | 0.02809 | 0.01238 | 0.011838 | 0.0667 |
| 57 | 5   | 1 | 0.02247 | 0.01111 | 0.008528 | 0.0592 |
| 58 | 4   | 1 | 0.01685 | 0.00965 | 0.005488 | 0.0518 |
| 63 | 3   | 1 | 0.01124 | 0.0079  | 0.002832 | 0.0446 |
| 64 | 2   | 1 | 0.00562 | 0.0056  | 0.000796 | 0.0397 |

|    |   |   |   |     |    |    |
|----|---|---|---|-----|----|----|
| 65 | 1 | 1 | 0 | NaN | NA | NA |
|----|---|---|---|-----|----|----|

**Table S144.** Manisa station Kaplan-Meier survival estimates according to SPEI-12

| Kaplan-Meier Wet to Dry (SPEI12) |        |         |          |         |              |              |
|----------------------------------|--------|---------|----------|---------|--------------|--------------|
|                                  |        | n       | events   | median  | 0.95LCL      | 0.95UCL      |
|                                  |        | 170     | 170      | 19      | 17           | 23           |
| time                             | n.risk | n.event | survival | std.err | lower 95% CI | upper 95% CI |
| 1                                | 170    | 7       | 0.95882  | 0.01524 | 0.929415     | 0.9892       |
| 2                                | 163    | 5       | 0.92941  | 0.01964 | 0.891695     | 0.9687       |
| 3                                | 158    | 6       | 0.89412  | 0.0236  | 0.849041     | 0.9416       |
| 4                                | 152    | 4       | 0.87059  | 0.02574 | 0.821566     | 0.9225       |
| 5                                | 148    | 4       | 0.84706  | 0.02761 | 0.794645     | 0.9029       |
| 6                                | 144    | 2       | 0.83529  | 0.02845 | 0.781358     | 0.893        |
| 7                                | 142    | 3       | 0.81765  | 0.02962 | 0.761615     | 0.8778       |
| 8                                | 139    | 3       | 0.8      | 0.03068 | 0.742075     | 0.8624       |
| 9                                | 136    | 3       | 0.78235  | 0.03165 | 0.722718     | 0.8469       |
| 10                               | 133    | 3       | 0.76471  | 0.03253 | 0.703528     | 0.8312       |
| 11                               | 130    | 3       | 0.74706  | 0.03334 | 0.68449      | 0.8153       |
| 12                               | 127    | 7       | 0.70588  | 0.03495 | 0.640607     | 0.7778       |
| 13                               | 120    | 6       | 0.67059  | 0.03605 | 0.603531     | 0.7451       |
| 14                               | 114    | 6       | 0.63529  | 0.03692 | 0.566905     | 0.7119       |
| 15                               | 108    | 5       | 0.60588  | 0.03748 | 0.536704     | 0.684        |
| 16                               | 103    | 5       | 0.57647  | 0.0379  | 0.50678      | 0.6557       |
| 17                               | 98     | 6       | 0.54118  | 0.03822 | 0.471223     | 0.6215       |
| 18                               | 92     | 6       | 0.50588  | 0.03835 | 0.436043     | 0.5869       |
| 19                               | 86     | 5       | 0.47647  | 0.03831 | 0.407009     | 0.5578       |
| 20                               | 81     | 4       | 0.45294  | 0.03818 | 0.383968     | 0.5343       |
| 21                               | 77     | 3       | 0.43529  | 0.03803 | 0.366796     | 0.5166       |
| 22                               | 74     | 2       | 0.42353  | 0.0379  | 0.355401     | 0.5047       |
| 23                               | 72     | 3       | 0.40588  | 0.03766 | 0.338388     | 0.4868       |
| 24                               | 69     | 4       | 0.38235  | 0.03727 | 0.315856     | 0.4628       |
| 25                               | 65     | 3       | 0.36471  | 0.03692 | 0.299074     | 0.4447       |
| 26                               | 62     | 3       | 0.34706  | 0.03651 | 0.282395     | 0.4265       |
| 27                               | 59     | 4       | 0.32353  | 0.03588 | 0.260323     | 0.4021       |
| 28                               | 55     | 4       | 0.3      | 0.03515 | 0.23845      | 0.3774       |
| 29                               | 51     | 3       | 0.28235  | 0.03452 | 0.222184     | 0.3588       |
| 30                               | 48     | 3       | 0.26471  | 0.03384 | 0.206042     | 0.3401       |
| 31                               | 45     | 3       | 0.24706  | 0.03308 | 0.190034     | 0.3212       |

|     |    |   |         |         |          |        |
|-----|----|---|---------|---------|----------|--------|
| 32  | 42 | 2 | 0.23529 | 0.03253 | 0.17944  | 0.3085 |
| 33  | 40 | 2 | 0.22353 | 0.03195 | 0.168911 | 0.2958 |
| 34  | 38 | 1 | 0.21765 | 0.03165 | 0.163673 | 0.2894 |
| 35  | 37 | 1 | 0.21176 | 0.03134 | 0.158453 | 0.283  |
| 36  | 36 | 1 | 0.20588 | 0.03101 | 0.153251 | 0.2766 |
| 37  | 35 | 1 | 0.2     | 0.03068 | 0.148068 | 0.2701 |
| 38  | 34 | 1 | 0.19412 | 0.03033 | 0.142905 | 0.2637 |
| 39  | 33 | 1 | 0.18824 | 0.02998 | 0.137762 | 0.2572 |
| 40  | 32 | 1 | 0.18235 | 0.02962 | 0.132639 | 0.2507 |
| 41  | 31 | 1 | 0.17647 | 0.02924 | 0.127539 | 0.2442 |
| 42  | 30 | 1 | 0.17059 | 0.02885 | 0.122461 | 0.2376 |
| 43  | 29 | 1 | 0.16471 | 0.02845 | 0.117406 | 0.2311 |
| 44  | 28 | 1 | 0.15882 | 0.02803 | 0.112376 | 0.2245 |
| 45  | 27 | 1 | 0.15294 | 0.02761 | 0.107371 | 0.2179 |
| 46  | 26 | 1 | 0.14706 | 0.02716 | 0.102392 | 0.2112 |
| 64  | 25 | 1 | 0.14118 | 0.02671 | 0.097441 | 0.2045 |
| 70  | 24 | 1 | 0.13529 | 0.02623 | 0.09252  | 0.1978 |
| 71  | 23 | 1 | 0.12941 | 0.02574 | 0.087629 | 0.1911 |
| 85  | 22 | 1 | 0.12353 | 0.02524 | 0.08277  | 0.1844 |
| 92  | 21 | 1 | 0.11765 | 0.02471 | 0.077946 | 0.1776 |
| 93  | 20 | 1 | 0.11176 | 0.02417 | 0.073158 | 0.1707 |
| 94  | 19 | 1 | 0.10588 | 0.0236  | 0.068409 | 0.1639 |
| 95  | 18 | 1 | 0.1     | 0.02301 | 0.063701 | 0.157  |
| 96  | 17 | 2 | 0.08824 | 0.02175 | 0.054423 | 0.1431 |
| 97  | 15 | 2 | 0.07647 | 0.02038 | 0.045354 | 0.1289 |
| 98  | 13 | 1 | 0.07059 | 0.01964 | 0.040911 | 0.1218 |
| 99  | 12 | 1 | 0.06471 | 0.01887 | 0.036538 | 0.1146 |
| 100 | 11 | 1 | 0.05882 | 0.01805 | 0.032241 | 0.1073 |
| 101 | 10 | 1 | 0.05294 | 0.01717 | 0.028033 | 0.1    |
| 102 | 9  | 1 | 0.04706 | 0.01624 | 0.023926 | 0.0926 |
| 145 | 8  | 1 | 0.04118 | 0.01524 | 0.019935 | 0.0851 |
| 146 | 7  | 1 | 0.03529 | 0.01415 | 0.016084 | 0.0774 |
| 147 | 6  | 1 | 0.02941 | 0.01296 | 0.012402 | 0.0698 |
| 148 | 5  | 1 | 0.02353 | 0.01163 | 0.008934 | 0.062  |
| 149 | 4  | 1 | 0.01765 | 0.0101  | 0.005749 | 0.0542 |
| 150 | 3  | 1 | 0.01176 | 0.00827 | 0.002966 | 0.0467 |
| 151 | 2  | 1 | 0.00588 | 0.00587 | 0.000833 | 0.0415 |
| 152 | 1  | 1 | 0       | NaN     | NA       | NA     |

**Table S145.** Manisa station Kaplan-Meier drought risk estimates according to SPEI-3, 6, and 12

| Drought Risk (SPEI3) |              | Drought Risk (SPEI6) |              | Drought Risk (SPEI12) |              |
|----------------------|--------------|----------------------|--------------|-----------------------|--------------|
| Time                 | Drought Risk | Time                 | Drought Risk | Time                  | Drought Risk |
| 1                    | 0.0618       | 1                    | 0.04494      | 1                     | 0.04118      |
| 2                    | 0.1236       | 2                    | 0.1236       | 2                     | 0.07059      |

|    |         |    |         |    |         |
|----|---------|----|---------|----|---------|
| 3  | 0.2191  | 3  | 0.19101 | 3  | 0.10588 |
| 4  | 0.30899 | 4  | 0.23034 | 4  | 0.12941 |
| 5  | 0.38764 | 5  | 0.25281 | 5  | 0.15294 |
| 6  | 0.42697 | 6  | 0.28652 | 6  | 0.16471 |
| 7  | 0.49438 | 7  | 0.30337 | 7  | 0.18235 |
| 8  | 0.54494 | 8  | 0.31461 | 8  | 0.2     |
| 9  | 0.57865 | 9  | 0.32584 | 9  | 0.21765 |
| 10 | 0.61798 | 10 | 0.35393 | 10 | 0.23529 |
| 11 | 0.64607 | 11 | 0.38764 | 11 | 0.25294 |
| 12 | 0.67978 | 12 | 0.42135 | 12 | 0.29412 |
| 13 | 0.70787 | 13 | 0.44382 | 13 | 0.32941 |
| 14 | 0.7191  | 14 | 0.47191 | 14 | 0.36471 |
| 15 | 0.72472 | 15 | 0.5     | 15 | 0.39412 |
| 16 | 0.75843 | 16 | 0.52247 | 16 | 0.42353 |
| 17 | 0.78652 | 17 | 0.53933 | 17 | 0.45882 |
| 18 | 0.82584 | 18 | 0.55618 | 18 | 0.49412 |
| 19 | 0.84831 | 19 | 0.56742 | 19 | 0.52353 |
| 20 | 0.85955 | 20 | 0.58427 | 20 | 0.54706 |
| 21 | 0.8764  | 21 | 0.61236 | 21 | 0.56471 |
| 22 | 0.89888 | 22 | 0.61798 | 22 | 0.57647 |
| 23 | 0.92135 | 23 | 0.63483 | 23 | 0.59412 |
| 24 | 0.9382  | 24 | 0.65169 | 24 | 0.61765 |
| 25 | 0.94944 | 25 | 0.66854 | 25 | 0.63529 |
| 26 | 0.96629 | 26 | 0.67978 | 26 | 0.65294 |
| 27 | 0.97753 | 27 | 0.69663 | 27 | 0.67647 |
| 28 | 0.98315 | 28 | 0.71348 | 28 | 0.7     |
| 30 | 0.98876 | 29 | 0.73034 | 29 | 0.71765 |
| 33 | 0.99438 | 30 | 0.75281 | 30 | 0.73529 |
| 49 | 1       | 31 | 0.76404 | 31 | 0.75294 |
|    |         | 32 | 0.7809  | 32 | 0.76471 |
|    |         | 33 | 0.79213 | 33 | 0.77647 |
|    |         | 34 | 0.79775 | 34 | 0.78235 |
|    |         | 35 | 0.80899 | 35 | 0.78824 |
|    |         | 37 | 0.81461 | 36 | 0.79412 |
|    |         | 38 | 0.82022 | 37 | 0.8     |
|    |         | 39 | 0.82584 | 38 | 0.80588 |
|    |         | 40 | 0.83146 | 39 | 0.81176 |
|    |         | 41 | 0.8427  | 40 | 0.81765 |
|    |         | 42 | 0.85393 | 41 | 0.82353 |
|    |         | 47 | 0.85955 | 42 | 0.82941 |
|    |         | 48 | 0.87079 | 43 | 0.83529 |
|    |         | 49 | 0.88202 | 44 | 0.84118 |
|    |         | 50 | 0.89326 | 45 | 0.84706 |
|    |         | 51 | 0.91011 | 46 | 0.85294 |
|    |         | 52 | 0.92697 | 64 | 0.85882 |

|    |         |     |         |
|----|---------|-----|---------|
| 53 | 0.94382 | 70  | 0.86471 |
| 54 | 0.96067 | 71  | 0.87059 |
| 55 | 0.96629 | 85  | 0.87647 |
| 56 | 0.97191 | 92  | 0.88235 |
| 57 | 0.97753 | 93  | 0.88824 |
| 58 | 0.98315 | 94  | 0.89412 |
| 63 | 0.98876 | 95  | 0.9     |
| 64 | 0.99438 | 96  | 0.91176 |
| 65 | 1       | 97  | 0.92353 |
|    |         | 98  | 0.92941 |
|    |         | 99  | 0.93529 |
|    |         | 100 | 0.94118 |
|    |         | 101 | 0.94706 |
|    |         | 102 | 0.95294 |
|    |         | 145 | 0.95882 |
|    |         | 146 | 0.96471 |
|    |         | 147 | 0.97059 |
|    |         | 148 | 0.97647 |
|    |         | 149 | 0.98235 |
|    |         | 150 | 0.98824 |
|    |         | 151 | 0.99412 |
|    |         | 152 | 1       |

**Table S146.** Menemen station Kaplan-Meier survival estimates according to SPI-3

| Kaplan-Meier Wet to Dry (SPI3) |        |         |          |         |              |              |
|--------------------------------|--------|---------|----------|---------|--------------|--------------|
|                                |        | n       | events   | median  | 0.95LCL      | 0.95UCL      |
|                                |        | 77      | 77       | 9       | 6            | 12           |
| time                           | n.risk | n.event | survival | std.err | lower 95% CL | upper 95% CL |
| 1                              | 77     | 5       | 0.9351   | 0.0281  | 0.88162      | 0.992        |
| 2                              | 72     | 6       | 0.8571   | 0.0399  | 0.78244      | 0.939        |
| 3                              | 66     | 9       | 0.7403   | 0.05    | 0.64852      | 0.845        |
| 4                              | 57     | 6       | 0.6623   | 0.0539  | 0.5647       | 0.777        |
| 5                              | 51     | 3       | 0.6234   | 0.0552  | 0.52402      | 0.742        |
| 6                              | 48     | 4       | 0.5714   | 0.0564  | 0.47093      | 0.693        |
| 7                              | 44     | 3       | 0.5325   | 0.0569  | 0.43191      | 0.656        |
| 8                              | 41     | 2       | 0.5065   | 0.057   | 0.40628      | 0.631        |
| 9                              | 39     | 4       | 0.4545   | 0.0567  | 0.35589      | 0.581        |
| 10                             | 35     | 3       | 0.4156   | 0.0562  | 0.31888      | 0.542        |
| 11                             | 32     | 3       | 0.3766   | 0.0552  | 0.28256      | 0.502        |
| 12                             | 29     | 2       | 0.3506   | 0.0544  | 0.25874      | 0.475        |
| 13                             | 27     | 2       | 0.3247   | 0.0534  | 0.23526      | 0.448        |
| 14                             | 25     | 3       | 0.2857   | 0.0515  | 0.2007       | 0.407        |
| 15                             | 22     | 3       | 0.2468   | 0.0491  | 0.16702      | 0.365        |

|    |    |   |        |        |         |       |
|----|----|---|--------|--------|---------|-------|
| 16 | 19 | 2 | 0.2208 | 0.0473 | 0.14512 | 0.336 |
| 17 | 17 | 3 | 0.1818 | 0.044  | 0.1132  | 0.292 |
| 18 | 14 | 5 | 0.1169 | 0.0366 | 0.06326 | 0.216 |
| 19 | 9  | 1 | 0.1039 | 0.0348 | 0.05392 | 0.2   |
| 20 | 8  | 1 | 0.0909 | 0.0328 | 0.04486 | 0.184 |
| 21 | 7  | 1 | 0.0779 | 0.0305 | 0.03614 | 0.168 |
| 23 | 6  | 1 | 0.0649 | 0.0281 | 0.02782 | 0.152 |
| 24 | 5  | 1 | 0.0519 | 0.0253 | 0.02001 | 0.135 |
| 25 | 4  | 1 | 0.039  | 0.0221 | 0.01285 | 0.118 |
| 26 | 3  | 1 | 0.026  | 0.0181 | 0.00661 | 0.102 |
| 27 | 2  | 1 | 0.013  | 0.0129 | 0.00185 | 0.091 |
| 36 | 1  | 1 | 0      | NaN    | NA      | NA    |

**Table S147.** Menemen station Kaplan-Meier survival estimates according to SPI-6

| Kaplan-Meier Wet to Dry (SPI6) |        |         |          |         |              |              |
|--------------------------------|--------|---------|----------|---------|--------------|--------------|
|                                |        | n       | events   | median  | 0.95LCL      | 0.95UCL      |
|                                |        | 83      | 83       | 13      | 10           | 17           |
| time                           | n.risk | n.event | survival | std.err | lower 95% CL | upper 95% CL |
| 1                              | 83     | 7       | 0.9157   | 0.0305  | 0.85779      | 0.9774       |
| 2                              | 76     | 9       | 0.8072   | 0.0433  | 0.72667      | 0.8967       |
| 3                              | 67     | 5       | 0.747    | 0.0477  | 0.65908      | 0.8466       |
| 4                              | 62     | 2       | 0.7229   | 0.0491  | 0.63274      | 0.8259       |
| 5                              | 60     | 1       | 0.7108   | 0.0498  | 0.6197       | 0.8154       |
| 6                              | 59     | 3       | 0.6747   | 0.0514  | 0.58108      | 0.7834       |
| 7                              | 56     | 2       | 0.6506   | 0.0523  | 0.55571      | 0.7617       |
| 8                              | 54     | 2       | 0.6265   | 0.0531  | 0.53062      | 0.7397       |
| 9                              | 52     | 2       | 0.6024   | 0.0537  | 0.50581      | 0.7175       |
| 10                             | 50     | 2       | 0.5783   | 0.0542  | 0.48126      | 0.6949       |
| 11                             | 48     | 2       | 0.5542   | 0.0546  | 0.45697      | 0.6722       |
| 12                             | 46     | 2       | 0.5301   | 0.0548  | 0.43292      | 0.6491       |
| 13                             | 44     | 4       | 0.4819   | 0.0548  | 0.38558      | 0.6024       |
| 14                             | 40     | 3       | 0.4458   | 0.0546  | 0.35071      | 0.5666       |
| 15                             | 37     | 2       | 0.4217   | 0.0542  | 0.32777      | 0.5425       |
| 16                             | 35     | 2       | 0.3976   | 0.0537  | 0.30509      | 0.5181       |
| 17                             | 33     | 2       | 0.3735   | 0.0531  | 0.28267      | 0.4935       |
| 18                             | 31     | 4       | 0.3253   | 0.0514  | 0.23863      | 0.4434       |
| 19                             | 27     | 3       | 0.2892   | 0.0498  | 0.20637      | 0.4052       |
| 20                             | 24     | 1       | 0.2771   | 0.0491  | 0.19577      | 0.3922       |
| 21                             | 23     | 1       | 0.2651   | 0.0484  | 0.18525      | 0.3792       |
| 22                             | 22     | 2       | 0.241    | 0.0469  | 0.16449      | 0.353        |
| 23                             | 20     | 2       | 0.2169   | 0.0452  | 0.14409      | 0.3264       |
| 24                             | 18     | 2       | 0.1928   | 0.0433  | 0.12412      | 0.2994       |
| 26                             | 16     | 1       | 0.1807   | 0.0422  | 0.11431      | 0.2857       |

|    |    |   |        |        |         |        |
|----|----|---|--------|--------|---------|--------|
| 27 | 15 | 1 | 0.1687 | 0.0411 | 0.10462 | 0.2719 |
| 37 | 14 | 1 | 0.1566 | 0.0399 | 0.09507 | 0.258  |
| 38 | 13 | 1 | 0.1446 | 0.0386 | 0.08567 | 0.244  |
| 39 | 12 | 2 | 0.1205 | 0.0357 | 0.06737 | 0.2155 |
| 40 | 10 | 1 | 0.1084 | 0.0341 | 0.05851 | 0.2009 |
| 41 | 9  | 1 | 0.0964 | 0.0324 | 0.04988 | 0.1862 |
| 42 | 8  | 1 | 0.0843 | 0.0305 | 0.04151 | 0.1713 |
| 43 | 7  | 1 | 0.0723 | 0.0284 | 0.03345 | 0.1562 |
| 44 | 6  | 1 | 0.0602 | 0.0261 | 0.02576 | 0.1409 |
| 45 | 5  | 1 | 0.0482 | 0.0235 | 0.01853 | 0.1254 |
| 46 | 4  | 1 | 0.0361 | 0.0205 | 0.0119  | 0.1098 |
| 52 | 3  | 1 | 0.0241 | 0.0168 | 0.00613 | 0.0947 |
| 53 | 2  | 1 | 0.012  | 0.012  | 0.00172 | 0.0845 |
| 54 | 1  | 1 | 0      | NaN    | NA      | NA     |

**Table S148.** Menemen station Kaplan-Meier survival estimates according to SPI-12

| Kaplan-Meier Wet to Dry (SPI12) |        |         |          |         |              |              |
|---------------------------------|--------|---------|----------|---------|--------------|--------------|
|                                 |        | n       | events   | median  | 0.95LCL      | 0.95UCL      |
|                                 |        | 92      | 92       | 17.5    | 16           | 20           |
| time                            | n.risk | n.event | survival | std.err | lower 95% CL | upper 95% CL |
| 1                               | 92     | 7       | 0.9239   | 0.0276  | 0.87129      | 0.9797       |
| 2                               | 85     | 6       | 0.8587   | 0.0363  | 0.79039      | 0.9329       |
| 3                               | 79     | 2       | 0.837    | 0.0385  | 0.76478      | 0.9159       |
| 4                               | 77     | 2       | 0.8152   | 0.0405  | 0.73964      | 0.8985       |
| 5                               | 75     | 1       | 0.8043   | 0.0414  | 0.72724      | 0.8896       |
| 6                               | 74     | 1       | 0.7935   | 0.0422  | 0.71493      | 0.8807       |
| 7                               | 73     | 1       | 0.7826   | 0.043   | 0.7027       | 0.8716       |
| 8                               | 72     | 3       | 0.75     | 0.0451  | 0.66654      | 0.8439       |
| 9                               | 69     | 3       | 0.7174   | 0.0469  | 0.63104      | 0.8156       |
| 10                              | 66     | 1       | 0.7065   | 0.0475  | 0.61934      | 0.806        |
| 11                              | 65     | 1       | 0.6957   | 0.048   | 0.60771      | 0.7963       |
| 12                              | 64     | 1       | 0.6848   | 0.0484  | 0.59613      | 0.7866       |
| 13                              | 63     | 2       | 0.663    | 0.0493  | 0.57316      | 0.767        |
| 14                              | 61     | 2       | 0.6413   | 0.05    | 0.55042      | 0.7472       |
| 15                              | 59     | 3       | 0.6087   | 0.0509  | 0.51671      | 0.7171       |
| 16                              | 56     | 5       | 0.5543   | 0.0518  | 0.46154      | 0.6658       |
| 17                              | 51     | 5       | 0.5      | 0.0521  | 0.40759      | 0.6134       |
| 18                              | 46     | 5       | 0.4457   | 0.0518  | 0.35483      | 0.5597       |
| 19                              | 41     | 4       | 0.4022   | 0.0511  | 0.31348      | 0.516        |
| 20                              | 37     | 4       | 0.3587   | 0.05    | 0.27294      | 0.4714       |
| 21                              | 33     | 4       | 0.3152   | 0.0484  | 0.23324      | 0.426        |
| 22                              | 29     | 5       | 0.2609   | 0.0458  | 0.18495      | 0.368        |
| 23                              | 24     | 3       | 0.2283   | 0.0438  | 0.15677      | 0.3324       |



|    |    |   |        |        |         |        |
|----|----|---|--------|--------|---------|--------|
| 24 | 21 | 3 | 0.1957 | 0.0414 | 0.12929 | 0.2961 |
| 25 | 18 | 1 | 0.1848 | 0.0405 | 0.1203  | 0.2838 |
| 26 | 17 | 1 | 0.1739 | 0.0395 | 0.11141 | 0.2715 |
| 27 | 16 | 1 | 0.163  | 0.0385 | 0.10262 | 0.259  |
| 36 | 15 | 1 | 0.1522 | 0.0374 | 0.09394 | 0.2465 |
| 38 | 14 | 1 | 0.1413 | 0.0363 | 0.08539 | 0.2338 |
| 39 | 13 | 1 | 0.1304 | 0.0351 | 0.07696 | 0.2211 |
| 40 | 12 | 1 | 0.1196 | 0.0338 | 0.06867 | 0.2082 |
| 41 | 11 | 1 | 0.1087 | 0.0325 | 0.06055 | 0.1951 |
| 42 | 10 | 2 | 0.087  | 0.0294 | 0.04485 | 0.1686 |
| 43 | 8  | 1 | 0.0761 | 0.0276 | 0.03733 | 0.1551 |
| 44 | 7  | 1 | 0.0652 | 0.0257 | 0.03009 | 0.1414 |
| 45 | 6  | 1 | 0.0543 | 0.0236 | 0.02317 | 0.1275 |
| 46 | 5  | 1 | 0.0435 | 0.0213 | 0.01667 | 0.1134 |
| 47 | 4  | 1 | 0.0326 | 0.0185 | 0.01071 | 0.0992 |
| 54 | 3  | 1 | 0.0217 | 0.0152 | 0.00552 | 0.0856 |
| 59 | 2  | 1 | 0.0109 | 0.0108 | 0.00155 | 0.0763 |
| 60 | 1  | 1 | 0      | NaN    | NA      | NA     |

**Table S149.** Menemen station Kaplan-Meier drought risk estimates according to SPI-3, 6, and 12

| Drought Risk (SPI3) |              | Drought Risk (SPI6) |              | Drought Risk (SPI12) |              |
|---------------------|--------------|---------------------|--------------|----------------------|--------------|
| Time                | Drought Risk | Time                | Drought Risk | Time                 | Drought Risk |
| 1                   | 0.0649       | 1                   | 0.0843       | 1                    | 0.0761       |
| 2                   | 0.1429       | 2                   | 0.1928       | 2                    | 0.1413       |
| 3                   | 0.2597       | 3                   | 0.253        | 3                    | 0.163        |
| 4                   | 0.3377       | 4                   | 0.2771       | 4                    | 0.1848       |
| 5                   | 0.3766       | 5                   | 0.2892       | 5                    | 0.1957       |
| 6                   | 0.4286       | 6                   | 0.3253       | 6                    | 0.2065       |
| 7                   | 0.4675       | 7                   | 0.3494       | 7                    | 0.2174       |
| 8                   | 0.4935       | 8                   | 0.3735       | 8                    | 0.25         |
| 9                   | 0.5455       | 9                   | 0.3976       | 9                    | 0.2826       |
| 10                  | 0.5844       | 10                  | 0.4217       | 10                   | 0.2935       |
| 11                  | 0.6234       | 11                  | 0.4458       | 11                   | 0.3043       |
| 12                  | 0.6494       | 12                  | 0.4699       | 12                   | 0.3152       |
| 13                  | 0.6753       | 13                  | 0.5181       | 13                   | 0.337        |
| 14                  | 0.7143       | 14                  | 0.5542       | 14                   | 0.3587       |
| 15                  | 0.7532       | 15                  | 0.5783       | 15                   | 0.3913       |
| 16                  | 0.7792       | 16                  | 0.6024       | 16                   | 0.4457       |
| 17                  | 0.8182       | 17                  | 0.6265       | 17                   | 0.5          |
| 18                  | 0.8831       | 18                  | 0.6747       | 18                   | 0.5543       |
| 19                  | 0.8961       | 19                  | 0.7108       | 19                   | 0.5978       |
| 20                  | 0.9091       | 20                  | 0.7229       | 20                   | 0.6413       |
| 21                  | 0.9221       | 21                  | 0.7349       | 21                   | 0.6848       |
| 23                  | 0.9351       | 22                  | 0.759        | 22                   | 0.7391       |

|    |        |    |        |    |        |
|----|--------|----|--------|----|--------|
| 24 | 0.9481 | 23 | 0.7831 | 23 | 0.7717 |
| 25 | 0.961  | 24 | 0.8072 | 24 | 0.8043 |
| 26 | 0.974  | 26 | 0.8193 | 25 | 0.8152 |
| 27 | 0.987  | 27 | 0.8313 | 26 | 0.8261 |
| 36 | 1      | 37 | 0.8434 | 27 | 0.837  |
|    |        | 38 | 0.8554 | 36 | 0.8478 |
|    |        | 39 | 0.8795 | 38 | 0.8587 |
|    |        | 40 | 0.8916 | 39 | 0.8696 |
|    |        | 41 | 0.9036 | 40 | 0.8804 |
|    |        | 42 | 0.9157 | 41 | 0.8913 |
|    |        | 43 | 0.9277 | 42 | 0.913  |
|    |        | 44 | 0.9398 | 43 | 0.9239 |
|    |        | 45 | 0.9518 | 44 | 0.9348 |
|    |        | 46 | 0.9639 | 45 | 0.9457 |
|    |        | 52 | 0.9759 | 46 | 0.9565 |
|    |        | 53 | 0.988  | 47 | 0.9674 |
|    |        | 54 | 1      | 54 | 0.9783 |
|    |        |    |        | 59 | 0.9891 |
|    |        |    |        | 60 | 1      |

**Table S150.** Menemen station Kaplan-Meier survival estimates according to SPEI-3

| Kaplan-Meier Wet to Dry (SPEI3) |        |         |          |         |              |              |
|---------------------------------|--------|---------|----------|---------|--------------|--------------|
|                                 |        | n       | events   | median  | 0.95LCL      | 0.95UCL      |
|                                 |        | 93      | 93       | 7       | 5            | 9            |
| time                            | n.risk | n.event | survival | std.err | lower 95% CI | upper 95% CI |
| 1                               | 93     | 6       | 0.9355   | 0.0255  | 0.88686      | 0.9868       |
| 2                               | 87     | 6       | 0.871    | 0.0348  | 0.80543      | 0.9418       |
| 3                               | 81     | 11      | 0.7527   | 0.0447  | 0.66992      | 0.8457       |
| 4                               | 70     | 6       | 0.6882   | 0.048   | 0.60018      | 0.7891       |
| 5                               | 64     | 9       | 0.5914   | 0.051   | 0.49947      | 0.7002       |
| 6                               | 55     | 7       | 0.5161   | 0.0518  | 0.42393      | 0.6284       |
| 7                               | 48     | 6       | 0.4516   | 0.0516  | 0.361        | 0.565        |
| 8                               | 42     | 4       | 0.4086   | 0.051   | 0.31997      | 0.5218       |
| 9                               | 38     | 5       | 0.3548   | 0.0496  | 0.26978      | 0.4667       |
| 10                              | 33     | 3       | 0.3226   | 0.0485  | 0.24029      | 0.4331       |
| 11                              | 30     | 3       | 0.2903   | 0.0471  | 0.21129      | 0.3989       |
| 12                              | 27     | 4       | 0.2473   | 0.0447  | 0.17348      | 0.3526       |
| 13                              | 23     | 4       | 0.2043   | 0.0418  | 0.1368       | 0.3051       |
| 14                              | 19     | 4       | 0.1613   | 0.0381  | 0.10147      | 0.2564       |
| 15                              | 15     | 3       | 0.129    | 0.0348  | 0.0761       | 0.2188       |
| 16                              | 12     | 2       | 0.1075   | 0.0321  | 0.05987      | 0.1931       |
| 17                              | 10     | 3       | 0.0753   | 0.0274  | 0.03692      | 0.1535       |
| 18                              | 7      | 1       | 0.0645   | 0.0255  | 0.02976      | 0.1399       |

|    |   |   |        |        |         |        |
|----|---|---|--------|--------|---------|--------|
| 19 | 6 | 1 | 0.0538 | 0.0234 | 0.02292 | 0.1261 |
| 25 | 5 | 1 | 0.043  | 0.021  | 0.01649 | 0.1122 |
| 26 | 4 | 2 | 0.0215 | 0.015  | 0.00546 | 0.0847 |
| 27 | 2 | 1 | 0.0108 | 0.0107 | 0.00153 | 0.0755 |
| 37 | 1 | 1 | 0      | NaN    | NA      | NA     |

**Table S151.** Menemen station Kaplan-Meier survival estimates according to SPEI-6

| Kaplan-Meier Wet to Dry (SPEI6) |        |         |          |         |              |              |
|---------------------------------|--------|---------|----------|---------|--------------|--------------|
|                                 |        | n       | events   | median  | 0.95LCL      | 0.95UCL      |
|                                 |        | 88      | 88       | 14      | 12           | 17           |
| time                            | n.risk | n.event | survival | std.err | lower 95% CI | upper 95% CI |
| 1                               | 88     | 5       | 0.9432   | 0.0247  | 0.89603      | 0.9928       |
| 2                               | 83     | 5       | 0.8864   | 0.0338  | 0.82247      | 0.9552       |
| 3                               | 78     | 6       | 0.8182   | 0.0411  | 0.74144      | 0.9029       |
| 4                               | 72     | 3       | 0.7841   | 0.0439  | 0.70267      | 0.8749       |
| 6                               | 69     | 1       | 0.7727   | 0.0447  | 0.68995      | 0.8654       |
| 7                               | 68     | 3       | 0.7386   | 0.0468  | 0.65231      | 0.8364       |
| 8                               | 65     | 3       | 0.7045   | 0.0486  | 0.61539      | 0.8066       |
| 9                               | 62     | 3       | 0.6705   | 0.0501  | 0.5791       | 0.7762       |
| 10                              | 59     | 3       | 0.6364   | 0.0513  | 0.54339      | 0.7452       |
| 11                              | 56     | 3       | 0.6023   | 0.0522  | 0.50822      | 0.7137       |
| 12                              | 53     | 3       | 0.5682   | 0.0528  | 0.47357      | 0.6817       |
| 13                              | 50     | 4       | 0.5227   | 0.0532  | 0.42813      | 0.6382       |
| 14                              | 46     | 3       | 0.4886   | 0.0533  | 0.3946       | 0.6051       |
| 15                              | 43     | 3       | 0.4545   | 0.0531  | 0.36156      | 0.5714       |
| 16                              | 40     | 4       | 0.4091   | 0.0524  | 0.31825      | 0.5259       |
| 17                              | 36     | 3       | 0.375    | 0.0516  | 0.28634      | 0.4911       |
| 18                              | 33     | 4       | 0.3295   | 0.0501  | 0.24462      | 0.444        |
| 19                              | 29     | 5       | 0.2727   | 0.0475  | 0.19389      | 0.3836       |
| 20                              | 24     | 3       | 0.2386   | 0.0454  | 0.16431      | 0.3466       |
| 21                              | 21     | 2       | 0.2159   | 0.0439  | 0.145        | 0.3215       |
| 22                              | 19     | 2       | 0.1932   | 0.0421  | 0.12605      | 0.2961       |
| 23                              | 17     | 1       | 0.1818   | 0.0411  | 0.11672      | 0.2832       |
| 24                              | 16     | 1       | 0.1705   | 0.0401  | 0.10751      | 0.2703       |
| 25                              | 15     | 2       | 0.1477   | 0.0378  | 0.08944      | 0.244        |
| 26                              | 13     | 1       | 0.1364   | 0.0366  | 0.0806       | 0.2307       |

|    |    |   |        |        |         |        |
|----|----|---|--------|--------|---------|--------|
| 27 | 12 | 1 | 0.125  | 0.0353 | 0.07192 | 0.2173 |
| 29 | 11 | 1 | 0.1136 | 0.0338 | 0.0634  | 0.2037 |
| 30 | 10 | 1 | 0.1023 | 0.0323 | 0.05507 | 0.1899 |
| 41 | 9  | 1 | 0.0909 | 0.0306 | 0.04695 | 0.176  |
| 42 | 8  | 1 | 0.0795 | 0.0288 | 0.03908 | 0.1619 |
| 43 | 7  | 1 | 0.0682 | 0.0269 | 0.03149 | 0.1476 |
| 44 | 6  | 1 | 0.0568 | 0.0247 | 0.02425 | 0.1331 |
| 53 | 5  | 1 | 0.0455 | 0.0222 | 0.01745 | 0.1184 |
| 54 | 4  | 1 | 0.0341 | 0.0193 | 0.01121 | 0.1037 |
| 63 | 3  | 1 | 0.0227 | 0.0159 | 0.00577 | 0.0894 |
| 64 | 2  | 1 | 0.0114 | 0.0113 | 0.00162 | 0.0798 |
| 65 | 1  | 1 | 0      | NaN    | NA      | NA     |

**Table S152.** Menemen station Kaplan-Meier survival estimates according to SPEI-12

| Kaplan-Meier Wet to Dry (SPEI12) |        |         |          |         |              |              |
|----------------------------------|--------|---------|----------|---------|--------------|--------------|
|                                  |        | n       | events   | median  | 0.95LCL      | 0.95UCL      |
|                                  |        | 96      | 96       | 15      | 13           | 17           |
| time                             | n.risk | n.event | survival | std.err | lower 95% CI | upper 95% CI |
| 1                                | 96     | 5       | 0.9479   | 0.0227  | 0.9045       | 0.9934       |
| 2                                | 91     | 6       | 0.8854   | 0.0325  | 0.82394      | 0.9515       |
| 3                                | 85     | 4       | 0.8437   | 0.0371  | 0.77416      | 0.9196       |
| 4                                | 81     | 3       | 0.8125   | 0.0398  | 0.73806      | 0.8945       |
| 5                                | 78     | 3       | 0.7812   | 0.0422  | 0.70278      | 0.8685       |
| 6                                | 75     | 1       | 0.7708   | 0.0429  | 0.69118      | 0.8597       |
| 7                                | 74     | 1       | 0.7604   | 0.0436  | 0.67965      | 0.8508       |
| 8                                | 73     | 1       | 0.75     | 0.0442  | 0.6682       | 0.8418       |
| 9                                | 72     | 2       | 0.7292   | 0.0454  | 0.64548      | 0.8237       |
| 10                               | 70     | 3       | 0.6979   | 0.0469  | 0.61185      | 0.7961       |
| 11                               | 67     | 4       | 0.6562   | 0.0485  | 0.5678       | 0.7585       |
| 12                               | 63     | 4       | 0.6146   | 0.0497  | 0.52455      | 0.7201       |
| 13                               | 59     | 4       | 0.5729   | 0.0505  | 0.48204      | 0.6809       |
| 14                               | 55     | 4       | 0.5312   | 0.0509  | 0.44024      | 0.6411       |
| 15                               | 51     | 4       | 0.4896   | 0.051   | 0.39914      | 0.6005       |
| 16                               | 47     | 5       | 0.4375   | 0.0506  | 0.34871      | 0.5489       |
| 17                               | 42     | 5       | 0.3854   | 0.0497  | 0.29938      | 0.4962       |
| 18                               | 37     | 5       | 0.3333   | 0.0481  | 0.2512       | 0.4423       |
| 19                               | 32     | 4       | 0.2917   | 0.0464  | 0.21355      | 0.3984       |
| 20                               | 28     | 4       | 0.25     | 0.0442  | 0.17679      | 0.3535       |
| 21                               | 24     | 3       | 0.2187   | 0.0422  | 0.14989      | 0.3192       |
| 22                               | 21     | 2       | 0.1979   | 0.0407  | 0.13231      | 0.2961       |
| 23                               | 19     | 2       | 0.1771   | 0.039   | 0.11505      | 0.2726       |

|    |    |   |        |        |         |        |
|----|----|---|--------|--------|---------|--------|
| 24 | 17 | 1 | 0.1667 | 0.038  | 0.10656 | 0.2607 |
| 38 | 16 | 1 | 0.1562 | 0.0371 | 0.09816 | 0.2487 |
| 39 | 15 | 1 | 0.1458 | 0.036  | 0.08987 | 0.2367 |
| 40 | 14 | 1 | 0.1354 | 0.0349 | 0.08169 | 0.2245 |
| 41 | 13 | 1 | 0.125  | 0.0338 | 0.07363 | 0.2122 |
| 42 | 12 | 2 | 0.1042 | 0.0312 | 0.05794 | 0.1873 |
| 43 | 10 | 1 | 0.0938 | 0.0297 | 0.05033 | 0.1746 |
| 44 | 9  | 1 | 0.0833 | 0.0282 | 0.04292 | 0.1618 |
| 45 | 8  | 1 | 0.0729 | 0.0265 | 0.03573 | 0.1488 |
| 46 | 7  | 1 | 0.0625 | 0.0247 | 0.0288  | 0.1356 |
| 47 | 6  | 3 | 0.0313 | 0.0178 | 0.01026 | 0.0952 |
| 48 | 3  | 1 | 0.0208 | 0.0146 | 0.00529 | 0.0821 |
| 49 | 2  | 1 | 0.0104 | 0.0104 | 0.00148 | 0.0732 |
| 96 | 1  | 1 | 0      | NaN    | NA      | NA     |

**Table S153.** Menemen station Kaplan-Meier drought risk estimates according to SPEI-3, 6, and 12

| Drought Risk (SPEI3) |              | Drought Risk (SPEI6) |              | Drought Risk (SPEI12) |              |
|----------------------|--------------|----------------------|--------------|-----------------------|--------------|
| Time                 | Drought Risk | Time                 | Drought Risk | Time                  | Drought Risk |
| 1                    | 0.0645       | 1                    | 0.0568       | 1                     | 0.0521       |
| 2                    | 0.129        | 2                    | 0.1136       | 2                     | 0.1146       |
| 3                    | 0.2473       | 3                    | 0.1818       | 3                     | 0.1563       |
| 4                    | 0.3118       | 4                    | 0.2159       | 4                     | 0.1875       |
| 5                    | 0.4086       | 6                    | 0.2273       | 5                     | 0.2188       |
| 6                    | 0.4839       | 7                    | 0.2614       | 6                     | 0.2292       |
| 7                    | 0.5484       | 8                    | 0.2955       | 7                     | 0.2396       |
| 8                    | 0.5914       | 9                    | 0.3295       | 8                     | 0.25         |
| 9                    | 0.6452       | 10                   | 0.3636       | 9                     | 0.2708       |
| 10                   | 0.6774       | 11                   | 0.3977       | 10                    | 0.3021       |
| 11                   | 0.7097       | 12                   | 0.4318       | 11                    | 0.3438       |
| 12                   | 0.7527       | 13                   | 0.4773       | 12                    | 0.3854       |
| 13                   | 0.7957       | 14                   | 0.5114       | 13                    | 0.4271       |
| 14                   | 0.8387       | 15                   | 0.5455       | 14                    | 0.4688       |
| 15                   | 0.871        | 16                   | 0.5909       | 15                    | 0.5104       |
| 16                   | 0.8925       | 17                   | 0.625        | 16                    | 0.5625       |
| 17                   | 0.9247       | 18                   | 0.6705       | 17                    | 0.6146       |
| 18                   | 0.9355       | 19                   | 0.7273       | 18                    | 0.6667       |
| 19                   | 0.9462       | 20                   | 0.7614       | 19                    | 0.7083       |
| 25                   | 0.957        | 21                   | 0.7841       | 20                    | 0.75         |
| 26                   | 0.9785       | 22                   | 0.8068       | 21                    | 0.7813       |
| 27                   | 0.9892       | 23                   | 0.8182       | 22                    | 0.8021       |
| 37                   | 1            | 24                   | 0.8295       | 23                    | 0.8229       |
|                      |              | 25                   | 0.8523       | 24                    | 0.8333       |

|    |        |    |        |
|----|--------|----|--------|
| 26 | 0.8636 | 38 | 0.8438 |
| 27 | 0.875  | 39 | 0.8542 |
| 29 | 0.8864 | 40 | 0.8646 |
| 30 | 0.8977 | 41 | 0.875  |
| 41 | 0.9091 | 42 | 0.8958 |
| 42 | 0.9205 | 43 | 0.9062 |
| 43 | 0.9318 | 44 | 0.9167 |
| 44 | 0.9432 | 45 | 0.9271 |
| 53 | 0.9545 | 46 | 0.9375 |
| 54 | 0.9659 | 47 | 0.9687 |
| 63 | 0.9773 | 48 | 0.9792 |
| 64 | 0.9886 | 49 | 0.9896 |
| 65 | 1      | 96 | 1      |

**Table S154.** Odemis station Kaplan-Meier survival estimates according to SPI-3

| Kaplan-Meier Wet to Dry (SPI3) |        |         |          |         |              |              |
|--------------------------------|--------|---------|----------|---------|--------------|--------------|
|                                |        | n       | events   | median  | 0.95LCL      | 0.95UCL      |
|                                |        | 96      | 96       | 7.5     | 6            | 9            |
| time                           | n.risk | n.event | survival | std.err | lower 95% CL | upper 95% CL |
| 1                              | 96     | 2       | 0.9792   | 0.0146  | 0.95101      | 1            |
| 2                              | 94     | 3       | 0.9479   | 0.0227  | 0.9045       | 0.9934       |
| 3                              | 91     | 11      | 0.8333   | 0.038   | 0.76202      | 0.9113       |
| 4                              | 80     | 8       | 0.75     | 0.0442  | 0.6682       | 0.8418       |
| 5                              | 72     | 8       | 0.6667   | 0.0481  | 0.57873      | 0.768        |
| 6                              | 64     | 8       | 0.5833   | 0.0503  | 0.4926       | 0.6908       |
| 7                              | 56     | 8       | 0.5      | 0.051   | 0.40935      | 0.6107       |
| 8                              | 48     | 8       | 0.4167   | 0.0503  | 0.32885      | 0.5279       |
| 9                              | 40     | 6       | 0.3542   | 0.0488  | 0.27033      | 0.464        |
| 10                             | 34     | 4       | 0.3125   | 0.0473  | 0.23227      | 0.4204       |
| 11                             | 30     | 5       | 0.2604   | 0.0448  | 0.18589      | 0.3648       |
| 12                             | 25     | 2       | 0.2396   | 0.0436  | 0.16776      | 0.3422       |
| 13                             | 23     | 2       | 0.2187   | 0.0422  | 0.14989      | 0.3192       |
| 14                             | 21     | 1       | 0.2083   | 0.0414  | 0.14106      | 0.3077       |
| 15                             | 20     | 1       | 0.1979   | 0.0407  | 0.13231      | 0.2961       |
| 16                             | 19     | 3       | 0.1667   | 0.038   | 0.10656      | 0.2607       |
| 17                             | 16     | 1       | 0.1562   | 0.0371  | 0.09816      | 0.2487       |
| 18                             | 15     | 2       | 0.1354   | 0.0349  | 0.08169      | 0.2245       |
| 20                             | 13     | 1       | 0.125    | 0.0338  | 0.07363      | 0.2122       |
| 21                             | 12     | 1       | 0.1146   | 0.0325  | 0.06571      | 0.1998       |

|    |    |   |        |        |         |        |
|----|----|---|--------|--------|---------|--------|
| 22 | 11 | 1 | 0.1042 | 0.0312 | 0.05794 | 0.1873 |
| 27 | 10 | 1 | 0.0937 | 0.0297 | 0.05033 | 0.1746 |
| 32 | 9  | 1 | 0.0833 | 0.0282 | 0.04292 | 0.1618 |
| 33 | 8  | 1 | 0.0729 | 0.0265 | 0.03573 | 0.1488 |
| 34 | 7  | 1 | 0.0625 | 0.0247 | 0.0288  | 0.1356 |
| 36 | 6  | 1 | 0.0521 | 0.0227 | 0.02219 | 0.1223 |
| 37 | 5  | 2 | 0.0312 | 0.0178 | 0.01026 | 0.0952 |
| 48 | 3  | 1 | 0.0208 | 0.0146 | 0.00529 | 0.0821 |
| 49 | 2  | 1 | 0.0104 | 0.0104 | 0.00148 | 0.0732 |
| 50 | 1  | 1 | 0      | NaN    | NA      | NA     |

**Table S155.** Odemis station Kaplan-Meier survival estimates according to SPI-6

| Kaplan-Meier Wet to Dry (SPI6) |        |         |          |         |              |              |
|--------------------------------|--------|---------|----------|---------|--------------|--------------|
|                                |        | n       | events   | median  | 0.95LCL      | 0.95UCL      |
|                                |        | 86      | 86       | 8       | 7            | 10           |
| time                           | n.risk | n.event | survival | std.err | lower 95% CL | upper 95% CL |
| 1                              | 86     | 3       | 0.9651   | 0.0198  | 0.92711      | 1            |
| 2                              | 83     | 5       | 0.907    | 0.0313  | 0.84762      | 0.9705       |
| 3                              | 78     | 7       | 0.8256   | 0.0409  | 0.74915      | 0.9098       |
| 4                              | 71     | 6       | 0.7558   | 0.0463  | 0.67026      | 0.8523       |
| 5                              | 65     | 5       | 0.6977   | 0.0495  | 0.60706      | 0.8018       |
| 6                              | 60     | 8       | 0.6047   | 0.0527  | 0.50967      | 0.7173       |
| 7                              | 52     | 7       | 0.5233   | 0.0539  | 0.42766      | 0.6402       |
| 8                              | 45     | 5       | 0.4651   | 0.0538  | 0.37079      | 0.5834       |
| 9                              | 40     | 4       | 0.4186   | 0.0532  | 0.32631      | 0.537        |
| 10                             | 36     | 5       | 0.3605   | 0.0518  | 0.27202      | 0.4777       |
| 11                             | 31     | 3       | 0.3256   | 0.0505  | 0.24019      | 0.4413       |
| 12                             | 28     | 1       | 0.314    | 0.05    | 0.22971      | 0.4291       |
| 13                             | 27     | 1       | 0.3023   | 0.0495  | 0.2193       | 0.4168       |
| 14                             | 26     | 1       | 0.2907   | 0.049   | 0.20896      | 0.4044       |
| 15                             | 25     | 1       | 0.2791   | 0.0484  | 0.19869      | 0.392        |
| 16                             | 24     | 1       | 0.2674   | 0.0477  | 0.1885       | 0.3794       |
| 17                             | 23     | 1       | 0.2558   | 0.047   | 0.17839      | 0.3668       |
| 19                             | 22     | 1       | 0.2442   | 0.0463  | 0.16836      | 0.3542       |
| 21                             | 21     | 2       | 0.2209   | 0.0447  | 0.14856      | 0.3286       |
| 22                             | 19     | 1       | 0.2093   | 0.0439  | 0.13879      | 0.3156       |
| 23                             | 18     | 2       | 0.186    | 0.042   | 0.11957      | 0.2895       |
| 24                             | 16     | 1       | 0.1744   | 0.0409  | 0.11013      | 0.2762       |
| 25                             | 15     | 1       | 0.1628   | 0.0398  | 0.1008       | 0.2629       |
| 26                             | 14     | 1       | 0.1512   | 0.0386  | 0.09161      | 0.2494       |
| 27                             | 13     | 1       | 0.1395   | 0.0374  | 0.08256      | 0.2358       |
| 28                             | 12     | 1       | 0.1279   | 0.036   | 0.07366      | 0.2221       |
| 29                             | 11     | 1       | 0.1163   | 0.0346  | 0.06493      | 0.2082       |

|     |    |   |        |        |         |        |
|-----|----|---|--------|--------|---------|--------|
| 30  | 10 | 1 | 0.1047 | 0.033  | 0.0564  | 0.1942 |
| 34  | 9  | 1 | 0.093  | 0.0313 | 0.04808 | 0.18   |
| 39  | 8  | 1 | 0.0814 | 0.0295 | 0.04002 | 0.1656 |
| 45  | 7  | 1 | 0.0698 | 0.0275 | 0.03225 | 0.1509 |
| 46  | 6  | 2 | 0.0465 | 0.0227 | 0.01786 | 0.1211 |
| 47  | 4  | 1 | 0.0349 | 0.0198 | 0.01148 | 0.106  |
| 48  | 3  | 1 | 0.0233 | 0.0163 | 0.00591 | 0.0915 |
| 49  | 2  | 1 | 0.0116 | 0.0116 | 0.00166 | 0.0816 |
| 133 | 1  | 1 | 0      | NaN    | NA      | NA     |

**Table S156.** Odemis station Kaplan-Meier survival estimates according to SPI-12

| Kaplan-Meier Wet to Dry (SPI12) |        |         |          |         |              |              |
|---------------------------------|--------|---------|----------|---------|--------------|--------------|
|                                 |        | n       | events   | median  | 0.95LCL      | 0.95UCL      |
|                                 |        | 80      | 80       | 17.5    | 15           | 20           |
| time                            | n.risk | n.event | survival | std.err | lower 95% CL | upper 95% CL |
| 1                               | 80     | 4       | 0.95     | 0.0244  | 0.90342      | 0.999        |
| 2                               | 76     | 4       | 0.9      | 0.0335  | 0.8366       | 0.9682       |
| 3                               | 72     | 3       | 0.8625   | 0.0385  | 0.79024      | 0.9414       |
| 4                               | 69     | 2       | 0.8375   | 0.0412  | 0.76044      | 0.9224       |
| 5                               | 67     | 2       | 0.8125   | 0.0436  | 0.73132      | 0.9027       |
| 6                               | 65     | 1       | 0.8      | 0.0447  | 0.71698      | 0.8926       |
| 7                               | 64     | 1       | 0.7875   | 0.0457  | 0.70277      | 0.8824       |
| 9                               | 63     | 1       | 0.775    | 0.0467  | 0.68869      | 0.8721       |
| 10                              | 62     | 1       | 0.7625   | 0.0476  | 0.67473      | 0.8617       |
| 11                              | 61     | 2       | 0.7375   | 0.0492  | 0.64712      | 0.8405       |
| 12                              | 59     | 3       | 0.7      | 0.0512  | 0.60645      | 0.808        |
| 13                              | 56     | 3       | 0.6625   | 0.0529  | 0.56658      | 0.7747       |
| 14                              | 53     | 3       | 0.625    | 0.0541  | 0.52743      | 0.7406       |
| 15                              | 50     | 3       | 0.5875   | 0.055   | 0.48895      | 0.7059       |
| 16                              | 47     | 3       | 0.55     | 0.0556  | 0.45111      | 0.6706       |
| 17                              | 44     | 4       | 0.5      | 0.0559  | 0.40161      | 0.6225       |
| 18                              | 40     | 4       | 0.45     | 0.0556  | 0.35318      | 0.5734       |
| 19                              | 36     | 4       | 0.4      | 0.0548  | 0.30585      | 0.5231       |
| 20                              | 32     | 4       | 0.35     | 0.0533  | 0.25964      | 0.4718       |
| 21                              | 28     | 3       | 0.3125   | 0.0518  | 0.22578      | 0.4325       |
| 22                              | 25     | 3       | 0.275    | 0.0499  | 0.19267      | 0.3925       |
| 23                              | 22     | 3       | 0.2375   | 0.0476  | 0.16038      | 0.3517       |
| 24                              | 19     | 3       | 0.2      | 0.0447  | 0.12903      | 0.31         |
| 25                              | 16     | 1       | 0.1875   | 0.0436  | 0.11882      | 0.2959       |
| 26                              | 15     | 1       | 0.175    | 0.0425  | 0.10874      | 0.2816       |
| 27                              | 14     | 1       | 0.1625   | 0.0412  | 0.09881      | 0.2672       |
| 28                              | 13     | 1       | 0.15     | 0.0399  | 0.08903      | 0.2527       |
| 29                              | 12     | 1       | 0.1375   | 0.0385  | 0.07942      | 0.238        |



|     |    |   |        |        |         |        |
|-----|----|---|--------|--------|---------|--------|
| 30  | 11 | 1 | 0.125  | 0.037  | 0.07    | 0.2232 |
| 31  | 10 | 1 | 0.1125 | 0.0353 | 0.06079 | 0.2082 |
| 32  | 9  | 1 | 0.1    | 0.0335 | 0.05182 | 0.193  |
| 33  | 8  | 1 | 0.0875 | 0.0316 | 0.04312 | 0.1776 |
| 37  | 7  | 1 | 0.075  | 0.0294 | 0.03474 | 0.1619 |
| 38  | 6  | 1 | 0.0625 | 0.0271 | 0.02675 | 0.146  |
| 39  | 5  | 1 | 0.05   | 0.0244 | 0.01924 | 0.13   |
| 85  | 4  | 1 | 0.0375 | 0.0212 | 0.01236 | 0.1138 |
| 86  | 3  | 1 | 0.025  | 0.0175 | 0.00636 | 0.0982 |
| 277 | 2  | 1 | 0.0125 | 0.0124 | 0.00178 | 0.0877 |
| 278 | 1  | 1 | 0      | NaN    | NA      | NA     |

**Table S157.** Odemis station Kaplan-Meier drought risk estimates according to SPI-3, 6, and 12

| Drought Risk (SPI3) |              | Drought Risk (SPI6) |              | Drought Risk (SPI12) |              |
|---------------------|--------------|---------------------|--------------|----------------------|--------------|
| Time                | Drought Risk | Time                | Drought Risk | Time                 | Drought Risk |
| 1                   | 0.0208       | 1                   | 0.0349       | 1                    | 0.05         |
| 2                   | 0.0521       | 2                   | 0.093        | 2                    | 0.1          |
| 3                   | 0.1667       | 3                   | 0.1744       | 3                    | 0.1375       |
| 4                   | 0.25         | 4                   | 0.2442       | 4                    | 0.1625       |
| 5                   | 0.3333       | 5                   | 0.3023       | 5                    | 0.1875       |
| 6                   | 0.4167       | 6                   | 0.3953       | 6                    | 0.2          |
| 7                   | 0.5          | 7                   | 0.4767       | 7                    | 0.2125       |
| 8                   | 0.5833       | 8                   | 0.5349       | 9                    | 0.225        |
| 9                   | 0.6458       | 9                   | 0.5814       | 10                   | 0.2375       |
| 10                  | 0.6875       | 10                  | 0.6395       | 11                   | 0.2625       |
| 11                  | 0.7396       | 11                  | 0.6744       | 12                   | 0.3          |
| 12                  | 0.7604       | 12                  | 0.686        | 13                   | 0.3375       |
| 13                  | 0.7813       | 13                  | 0.6977       | 14                   | 0.375        |
| 14                  | 0.7917       | 14                  | 0.7093       | 15                   | 0.4125       |
| 15                  | 0.8021       | 15                  | 0.7209       | 16                   | 0.45         |
| 16                  | 0.8333       | 16                  | 0.7326       | 17                   | 0.5          |
| 17                  | 0.8438       | 17                  | 0.7442       | 18                   | 0.55         |
| 18                  | 0.8646       | 19                  | 0.7558       | 19                   | 0.6          |
| 20                  | 0.875        | 21                  | 0.7791       | 20                   | 0.65         |
| 21                  | 0.8854       | 22                  | 0.7907       | 21                   | 0.6875       |
| 22                  | 0.8958       | 23                  | 0.814        | 22                   | 0.725        |
| 27                  | 0.9063       | 24                  | 0.8256       | 23                   | 0.7625       |
| 32                  | 0.9167       | 25                  | 0.8372       | 24                   | 0.8          |
| 33                  | 0.9271       | 26                  | 0.8488       | 25                   | 0.8125       |
| 34                  | 0.9375       | 27                  | 0.8605       | 26                   | 0.825        |
| 36                  | 0.9479       | 28                  | 0.8721       | 27                   | 0.8375       |
| 37                  | 0.9688       | 29                  | 0.8837       | 28                   | 0.85         |
| 48                  | 0.9792       | 30                  | 0.8953       | 29                   | 0.8625       |
| 49                  | 0.9896       | 34                  | 0.907        | 30                   | 0.875        |

|    |   |     |        |     |        |
|----|---|-----|--------|-----|--------|
| 50 | 1 | 39  | 0.9186 | 31  | 0.8875 |
|    |   | 45  | 0.9302 | 32  | 0.9    |
|    |   | 46  | 0.9535 | 33  | 0.9125 |
|    |   | 47  | 0.9651 | 37  | 0.925  |
|    |   | 48  | 0.9767 | 38  | 0.9375 |
|    |   | 49  | 0.9884 | 39  | 0.95   |
|    |   | 133 | 1      | 85  | 0.9625 |
|    |   |     |        | 86  | 0.975  |
|    |   |     |        | 277 | 0.9875 |
|    |   |     |        | 278 | 1      |

**Table S158.** Odemis station Kaplan-Meier survival estimates according to SPEI-3

| Kaplan-Meier Wet to Dry (SPEI3) |        |         |          |         |              |              |
|---------------------------------|--------|---------|----------|---------|--------------|--------------|
|                                 |        | n       | events   | median  | 0.95LCL      | 0.95UCL      |
|                                 |        | 93      | 93       | 7       | 6            | 8            |
| time                            | n.risk | n.event | survival | std.err | lower 95% CI | upper 95% CI |
| 1                               | 93     | 2       | 0.9785   | 0.015   | 0.94945      | 10.000       |
| 2                               | 91     | 1       | 0.9677   | 0.0183  | 0.93249      | 10.000       |
| 3                               | 90     | 9       | 0.871    | 0.0348  | 0.80543      | 0.9418       |
| 4                               | 81     | 8       | 0.7849   | 0.0426  | 0.70573      | 0.8731       |
| 5                               | 73     | 9       | 0.6882   | 0.048   | 0.60018      | 0.7891       |
| 6                               | 64     | 11      | 0.5699   | 0.0513  | 0.47765      | 0.6799       |
| 7                               | 53     | 9       | 0.4731   | 0.0518  | 0.38179      | 0.5863       |
| 8                               | 44     | 8       | 0.3871   | 0.0505  | 0.29975      | 0.4999       |
| 9                               | 36     | 6       | 0.3226   | 0.0485  | 0.24029      | 0.4331       |
| 10                              | 30     | 5       | 0.2688   | 0.046   | 0.19226      | 0.3759       |
| 11                              | 25     | 3       | 0.2366   | 0.0441  | 0.1642       | 0.3408       |
| 12                              | 22     | 1       | 0.2258   | 0.0434  | 0.15499      | 0.329        |
| 13                              | 21     | 2       | 0.2043   | 0.0418  | 0.1368       | 0.3051       |
| 14                              | 19     | 1       | 0.1935   | 0.041   | 0.12783      | 0.2931       |
| 15                              | 18     | 1       | 0.1828   | 0.0401  | 0.11894      | 0.2809       |
| 16                              | 17     | 1       | 0.172    | 0.0391  | 0.11016      | 0.2687       |
| 17                              | 16     | 1       | 0.1613   | 0.0381  | 0.10147      | 0.2564       |
| 18                              | 15     | 2       | 0.1398   | 0.036   | 0.08443      | 0.2314       |
| 21                              | 13     | 1       | 0.129    | 0.0348  | 0.0761       | 0.2188       |
| 22                              | 12     | 4       | 0.086    | 0.0291  | 0.04435      | 0.1668       |
| 23                              | 8      | 1       | 0.0753   | 0.0274  | 0.03692      | 0.1535       |
| 31                              | 7      | 1       | 0.0645   | 0.0255  | 0.02976      | 0.1399       |
| 32                              | 6      | 1       | 0.0538   | 0.0234  | 0.02292      | 0.1261       |
| 36                              | 5      | 1       | 0.043    | 0.021   | 0.01649      | 0.1122       |
| 37                              | 4      | 1       | 0.0323   | 0.0183  | 0.0106       | 0.0982       |
| 41                              | 3      | 1       | 0.0215   | 0.015   | 0.00546      | 0.0847       |
| 42                              | 2      | 1       | 0.0108   | 0.0107  | 0.00153      | 0.0755       |

|    |   |   |   |     |    |    |
|----|---|---|---|-----|----|----|
| 43 | 1 | 1 | 0 | NaN | NA | NA |
|----|---|---|---|-----|----|----|

**Table S159.** Odemis station Kaplan-Meier survival estimates according to SPEI-6

| Kaplan-Meier Wet to Dry (SPEI6) |        |         |          |         |              |              |
|---------------------------------|--------|---------|----------|---------|--------------|--------------|
|                                 |        | n       | events   | median  | 0.95LCL      | 0.95UCL      |
|                                 |        | 94      | 94       | 9       | 7            | 11           |
| time                            | n.risk | n.event | survival | std.err | lower 95% CI | upper 95% CI |
| 1                               | 94     | 4       | 0.9574   | 0.0208  | 0.9175       | 0.9991       |
| 2                               | 90     | 5       | 0.9043   | 0.0303  | 0.84669      | 0.9657       |
| 3                               | 85     | 5       | 0.8511   | 0.0367  | 0.78205      | 0.9262       |
| 4                               | 80     | 5       | 0.7979   | 0.0414  | 0.72068      | 0.8833       |
| 5                               | 75     | 6       | 0.734    | 0.0456  | 0.64994      | 0.829        |
| 6                               | 69     | 10      | 0.6277   | 0.0499  | 0.53716      | 0.7334       |
| 7                               | 59     | 6       | 0.5638   | 0.0511  | 0.47199      | 0.6735       |
| 8                               | 53     | 5       | 0.5106   | 0.0516  | 0.41895      | 0.6224       |
| 9                               | 48     | 6       | 0.4468   | 0.0513  | 0.35681      | 0.5595       |
| 10                              | 42     | 5       | 0.3936   | 0.0504  | 0.30627      | 0.5059       |
| 11                              | 37     | 2       | 0.3723   | 0.0499  | 0.28639      | 0.4841       |
| 12                              | 35     | 1       | 0.3617   | 0.0496  | 0.27652      | 0.4731       |
| 13                              | 34     | 1       | 0.3511   | 0.0492  | 0.2667       | 0.4621       |
| 14                              | 33     | 1       | 0.3404   | 0.0489  | 0.25693      | 0.4511       |
| 15                              | 32     | 1       | 0.3298   | 0.0485  | 0.24722      | 0.4399       |
| 16                              | 31     | 1       | 0.3191   | 0.0481  | 0.23755      | 0.4288       |
| 17                              | 30     | 2       | 0.2979   | 0.0472  | 0.21839      | 0.4063       |
| 18                              | 28     | 3       | 0.266    | 0.0456  | 0.19009      | 0.3721       |
| 19                              | 25     | 2       | 0.2447   | 0.0443  | 0.17153      | 0.349        |
| 20                              | 23     | 1       | 0.234    | 0.0437  | 0.16236      | 0.3374       |
| 21                              | 22     | 2       | 0.2128   | 0.0422  | 0.14422      | 0.3139       |
| 22                              | 20     | 1       | 0.2021   | 0.0414  | 0.13527      | 0.302        |
| 23                              | 19     | 1       | 0.1915   | 0.0406  | 0.1264       | 0.2901       |
| 24                              | 18     | 1       | 0.1809   | 0.0397  | 0.11762      | 0.2781       |
| 25                              | 17     | 1       | 0.1702   | 0.0388  | 0.10893      | 0.266        |
| 26                              | 16     | 1       | 0.1596   | 0.0378  | 0.10034      | 0.2538       |
| 27                              | 15     | 1       | 0.1489   | 0.0367  | 0.09186      | 0.2415       |
| 28                              | 14     | 1       | 0.1383   | 0.0356  | 0.0835       | 0.2291       |
| 29                              | 13     | 1       | 0.1277   | 0.0344  | 0.07526      | 0.2165       |
| 30                              | 12     | 1       | 0.117    | 0.0332  | 0.06716      | 0.2039       |
| 31                              | 11     | 1       | 0.1064   | 0.0318  | 0.05921      | 0.1911       |
| 43                              | 10     | 1       | 0.0957   | 0.0303  | 0.05144      | 0.1782       |
| 44                              | 9      | 1       | 0.0851   | 0.0288  | 0.04386      | 0.1651       |
| 45                              | 8      | 1       | 0.0745   | 0.0271  | 0.03651      | 0.1519       |
| 46                              | 7      | 1       | 0.0638   | 0.0252  | 0.02943      | 0.1384       |
| 62                              | 6      | 1       | 0.0532   | 0.0231  | 0.02267      | 0.1248       |

|    |   |   |        |        |         |        |
|----|---|---|--------|--------|---------|--------|
| 68 | 5 | 1 | 0.0426 | 0.0208 | 0.01631 | 0.111  |
| 69 | 4 | 1 | 0.0319 | 0.0181 | 0.01048 | 0.0972 |
| 70 | 3 | 1 | 0.0213 | 0.0149 | 0.0054  | 0.0838 |
| 71 | 2 | 1 | 0.0106 | 0.0106 | 0.00151 | 0.0747 |
| 87 | 1 | 1 | 0      | NaN    | NA      | NA     |

**Table S160.** Odemis station Kaplan-Meier survival estimates according to SPEI-12

| Kaplan-Meier Wet to Dry (SPEI12) |        |         |          |         |              |              |
|----------------------------------|--------|---------|----------|---------|--------------|--------------|
|                                  |        | n       | events   | median  | 0.95LCL      | 0.95UCL      |
|                                  |        | 100     | 100      | 17.5    | 15           | 20           |
| time                             | n.risk | n.event | survival | std.err | lower 95% CI | upper 95% CI |
| 1                                | 100    | 4       | 0.96     | 0.0196  | 0.92235      | 0.9992       |
| 2                                | 96     | 5       | 0.91     | 0.02862 | 0.8556       | 0.9679       |
| 3                                | 91     | 4       | 0.87     | 0.03363 | 0.80652      | 0.9385       |
| 4                                | 87     | 3       | 0.84     | 0.03666 | 0.77113      | 0.915        |
| 5                                | 84     | 3       | 0.81     | 0.03923 | 0.73665      | 0.8907       |
| 6                                | 81     | 3       | 0.78     | 0.04142 | 0.70289      | 0.8656       |
| 7                                | 78     | 3       | 0.75     | 0.0433  | 0.66976      | 0.8399       |
| 8                                | 75     | 3       | 0.72     | 0.0449  | 0.63716      | 0.8136       |
| 9                                | 72     | 2       | 0.7      | 0.04583 | 0.61571      | 0.7958       |
| 10                               | 70     | 2       | 0.68     | 0.04665 | 0.59445      | 0.7779       |
| 11                               | 68     | 2       | 0.66     | 0.04737 | 0.57339      | 0.7597       |
| 12                               | 66     | 2       | 0.64     | 0.048   | 0.55251      | 0.7413       |
| 13                               | 64     | 2       | 0.62     | 0.04854 | 0.53181      | 0.7228       |
| 14                               | 62     | 2       | 0.6      | 0.04899 | 0.51127      | 0.7041       |
| 15                               | 60     | 2       | 0.58     | 0.04936 | 0.4909       | 0.6853       |
| 16                               | 58     | 3       | 0.55     | 0.04975 | 0.46065      | 0.6567       |
| 17                               | 55     | 5       | 0.5      | 0.05    | 0.41101      | 0.6083       |
| 18                               | 50     | 4       | 0.46     | 0.04984 | 0.37199      | 0.5688       |
| 19                               | 46     | 4       | 0.42     | 0.04936 | 0.3336       | 0.5288       |
| 20                               | 42     | 3       | 0.39     | 0.04877 | 0.30522      | 0.4983       |
| 21                               | 39     | 1       | 0.38     | 0.04854 | 0.29584      | 0.4881       |
| 22                               | 38     | 1       | 0.37     | 0.04828 | 0.2865       | 0.4778       |
| 23                               | 37     | 1       | 0.36     | 0.048   | 0.27721      | 0.4675       |
| 24                               | 36     | 1       | 0.35     | 0.0477  | 0.26796      | 0.4572       |
| 25                               | 35     | 1       | 0.34     | 0.04737 | 0.25875      | 0.4468       |
| 26                               | 34     | 1       | 0.33     | 0.04702 | 0.24959      | 0.4363       |
| 27                               | 33     | 1       | 0.32     | 0.04665 | 0.24047      | 0.4258       |
| 28                               | 32     | 1       | 0.31     | 0.04625 | 0.2314       | 0.4153       |
| 29                               | 31     | 1       | 0.3      | 0.04583 | 0.22238      | 0.4047       |
| 30                               | 30     | 1       | 0.29     | 0.04538 | 0.21341      | 0.3941       |
| 31                               | 29     | 1       | 0.28     | 0.0449  | 0.20449      | 0.3834       |
| 32                               | 28     | 1       | 0.27     | 0.0444  | 0.19561      | 0.3727       |

|     |    |   |      |         |         |        |
|-----|----|---|------|---------|---------|--------|
| 33  | 27 | 1 | 0.26 | 0.04386 | 0.1868  | 0.3619 |
| 34  | 26 | 1 | 0.25 | 0.0433  | 0.17804 | 0.3511 |
| 35  | 25 | 1 | 0.24 | 0.04271 | 0.16933 | 0.3402 |
| 36  | 24 | 2 | 0.22 | 0.04142 | 0.15211 | 0.3182 |
| 37  | 22 | 2 | 0.2  | 0.04    | 0.13514 | 0.296  |
| 38  | 20 | 2 | 0.18 | 0.03842 | 0.11847 | 0.2735 |
| 39  | 18 | 1 | 0.17 | 0.03756 | 0.11025 | 0.2621 |
| 40  | 17 | 1 | 0.16 | 0.03666 | 0.10211 | 0.2507 |
| 41  | 16 | 1 | 0.15 | 0.03571 | 0.09407 | 0.2392 |
| 74  | 15 | 1 | 0.14 | 0.0347  | 0.08613 | 0.2276 |
| 75  | 14 | 1 | 0.13 | 0.03363 | 0.0783  | 0.2158 |
| 76  | 13 | 1 | 0.12 | 0.0325  | 0.07058 | 0.204  |
| 77  | 12 | 1 | 0.11 | 0.03129 | 0.06299 | 0.1921 |
| 78  | 11 | 1 | 0.1  | 0.03    | 0.05554 | 0.18   |
| 79  | 10 | 1 | 0.09 | 0.02862 | 0.04826 | 0.1678 |
| 80  | 9  | 1 | 0.08 | 0.02713 | 0.04116 | 0.1555 |
| 81  | 8  | 1 | 0.07 | 0.02551 | 0.03426 | 0.143  |
| 82  | 7  | 1 | 0.06 | 0.02375 | 0.02762 | 0.1303 |
| 83  | 6  | 1 | 0.05 | 0.02179 | 0.02128 | 0.1175 |
| 84  | 5  | 1 | 0.04 | 0.0196  | 0.01531 | 0.1045 |
| 85  | 4  | 1 | 0.03 | 0.01706 | 0.00984 | 0.0914 |
| 120 | 3  | 1 | 0.02 | 0.014   | 0.00507 | 0.0789 |
| 121 | 2  | 1 | 0.01 | 0.00995 | 0.00142 | 0.0703 |
| 156 | 1  | 1 | 0    | NaN     | NA      | NA     |

**Table S161.** Odemis station Kaplan-Meier drought risk estimates according to SPEI-3, 6, and 12

| Drought Risk (SPEI3) |              | Drought Risk (SPEI6) |              | Drought Risk (SPEI12) |              |
|----------------------|--------------|----------------------|--------------|-----------------------|--------------|
| Time                 | Drought Risk | Time                 | Drought Risk | Time                  | Drought Risk |
| 1                    | 0.0215       | 1                    | 0.0426       | 1                     | 0.04         |
| 2                    | 0.0323       | 2                    | 0.0957       | 2                     | 0.09         |
| 3                    | 0.129        | 3                    | 0.1489       | 3                     | 0.13         |
| 4                    | 0.2151       | 4                    | 0.2021       | 4                     | 0.16         |
| 5                    | 0.3118       | 5                    | 0.266        | 5                     | 0.19         |
| 6                    | 0.4301       | 6                    | 0.3723       | 6                     | 0.22         |
| 7                    | 0.5269       | 7                    | 0.4362       | 7                     | 0.25         |
| 8                    | 0.6129       | 8                    | 0.4894       | 8                     | 0.28         |
| 9                    | 0.6774       | 9                    | 0.5532       | 9                     | 0.3          |
| 10                   | 0.7312       | 10                   | 0.6064       | 10                    | 0.32         |
| 11                   | 0.7634       | 11                   | 0.6277       | 11                    | 0.34         |
| 12                   | 0.7742       | 12                   | 0.6383       | 12                    | 0.36         |
| 13                   | 0.7957       | 13                   | 0.6489       | 13                    | 0.38         |
| 14                   | 0.8065       | 14                   | 0.6596       | 14                    | 0.4          |
| 15                   | 0.8172       | 15                   | 0.6702       | 15                    | 0.42         |
| 16                   | 0.828        | 16                   | 0.6809       | 16                    | 0.45         |

|    |        |    |        |     |      |
|----|--------|----|--------|-----|------|
| 17 | 0.8387 | 17 | 0.7021 | 17  | 0.5  |
| 18 | 0.8602 | 18 | 0.734  | 18  | 0.54 |
| 21 | 0.871  | 19 | 0.7553 | 19  | 0.58 |
| 22 | 0.914  | 20 | 0.766  | 20  | 0.61 |
| 23 | 0.9247 | 21 | 0.7872 | 21  | 0.62 |
| 31 | 0.9355 | 22 | 0.7979 | 22  | 0.63 |
| 32 | 0.9462 | 23 | 0.8085 | 23  | 0.64 |
| 36 | 0.957  | 24 | 0.8191 | 24  | 0.65 |
| 37 | 0.9677 | 25 | 0.8298 | 25  | 0.66 |
| 41 | 0.9785 | 26 | 0.8404 | 26  | 0.67 |
| 42 | 0.9892 | 27 | 0.8511 | 27  | 0.68 |
| 43 | 1      | 28 | 0.8617 | 28  | 0.69 |
|    |        | 29 | 0.8723 | 29  | 0.7  |
|    |        | 30 | 0.883  | 30  | 0.71 |
|    |        | 31 | 0.8936 | 31  | 0.72 |
|    |        | 43 | 0.9043 | 32  | 0.73 |
|    |        | 44 | 0.9149 | 33  | 0.74 |
|    |        | 45 | 0.9255 | 34  | 0.75 |
|    |        | 46 | 0.9362 | 35  | 0.76 |
|    |        | 62 | 0.9468 | 36  | 0.78 |
|    |        | 68 | 0.9574 | 37  | 0.8  |
|    |        | 69 | 0.9681 | 38  | 0.82 |
|    |        | 70 | 0.9787 | 39  | 0.83 |
|    |        | 71 | 0.9894 | 40  | 0.84 |
|    |        | 87 | 1      | 41  | 0.85 |
|    |        |    |        | 74  | 0.86 |
|    |        |    |        | 75  | 0.87 |
|    |        |    |        | 76  | 0.88 |
|    |        |    |        | 77  | 0.89 |
|    |        |    |        | 78  | 0.9  |
|    |        |    |        | 79  | 0.91 |
|    |        |    |        | 80  | 0.92 |
|    |        |    |        | 81  | 0.93 |
|    |        |    |        | 82  | 0.94 |
|    |        |    |        | 83  | 0.95 |
|    |        |    |        | 84  | 0.96 |
|    |        |    |        | 85  | 0.97 |
|    |        |    |        | 120 | 0.98 |
|    |        |    |        | 121 | 0.99 |
|    |        |    |        | 156 | 1    |

**Table S162.** Salihli station Kaplan-Meier survival estimates according to SPI-3

|                                |
|--------------------------------|
| Kaplan-Meier Wet to Dry (SPI3) |
|--------------------------------|

|      |        |         |          |         |              |              |
|------|--------|---------|----------|---------|--------------|--------------|
|      |        | n       | events   | median  | 0.95LCL      | 0.95UCL      |
|      |        | 140     | 140      | 12      | 10           | 14           |
| time | n.risk | n.event | survival | std.err | lower 95% CL | upper 95% CL |
| 1    | 140    | 6       | 0.95714  | 0.01712 | 0.92417      | 0.9913       |
| 2    | 134    | 5       | 0.92143  | 0.02274 | 0.87792      | 0.9671       |
| 3    | 129    | 6       | 0.87857  | 0.0276  | 0.8261       | 0.9344       |
| 4    | 123    | 7       | 0.82857  | 0.03185 | 0.76844      | 0.8934       |
| 5    | 116    | 5       | 0.79286  | 0.03425 | 0.72849      | 0.8629       |
| 6    | 111    | 5       | 0.75714  | 0.03624 | 0.68934      | 0.8316       |
| 7    | 106    | 10      | 0.68571  | 0.03923 | 0.61297      | 0.7671       |
| 8    | 96     | 6       | 0.64286  | 0.0405  | 0.56819      | 0.7273       |
| 9    | 90     | 8       | 0.58571  | 0.04163 | 0.50955      | 0.6733       |
| 10   | 82     | 4       | 0.55714  | 0.04198 | 0.48065      | 0.6458       |
| 11   | 78     | 5       | 0.52143  | 0.04222 | 0.44491      | 0.6111       |
| 12   | 73     | 4       | 0.49286  | 0.04225 | 0.41663      | 0.583        |
| 13   | 69     | 5       | 0.45714  | 0.0421  | 0.38164      | 0.5476       |
| 14   | 64     | 7       | 0.40714  | 0.04152 | 0.33338      | 0.4972       |
| 15   | 57     | 7       | 0.35714  | 0.0405  | 0.28597      | 0.446        |
| 16   | 50     | 7       | 0.30714  | 0.03899 | 0.23949      | 0.3939       |
| 17   | 43     | 6       | 0.26429  | 0.03727 | 0.20047      | 0.3484       |
| 18   | 37     | 5       | 0.22857  | 0.03549 | 0.1686       | 0.3099       |
| 19   | 32     | 2       | 0.21429  | 0.03468 | 0.15604      | 0.2943       |
| 20   | 30     | 2       | 0.2      | 0.03381 | 0.1436       | 0.2786       |
| 21   | 28     | 2       | 0.18571  | 0.03287 | 0.13128      | 0.2627       |
| 22   | 26     | 2       | 0.17143  | 0.03185 | 0.1191       | 0.2467       |
| 23   | 24     | 1       | 0.16429  | 0.03132 | 0.11307      | 0.2387       |
| 24   | 23     | 2       | 0.15     | 0.03018 | 0.10112      | 0.2225       |
| 25   | 21     | 2       | 0.13571  | 0.02895 | 0.08935      | 0.2061       |
| 26   | 19     | 2       | 0.12143  | 0.0276  | 0.07777      | 0.1896       |
| 27   | 17     | 3       | 0.1      | 0.02535 | 0.06084      | 0.1644       |
| 28   | 14     | 3       | 0.07857  | 0.02274 | 0.04456      | 0.1386       |
| 29   | 11     | 1       | 0.07143  | 0.02177 | 0.03931      | 0.1298       |
| 30   | 10     | 1       | 0.06429  | 0.02073 | 0.03417      | 0.1209       |
| 31   | 9      | 1       | 0.05714  | 0.01962 | 0.02916      | 0.112        |
| 32   | 8      | 1       | 0.05     | 0.01842 | 0.02429      | 0.1029       |
| 33   | 7      | 1       | 0.04286  | 0.01712 | 0.01959      | 0.0938       |
| 37   | 6      | 1       | 0.03571  | 0.01568 | 0.0151       | 0.0845       |
| 38   | 5      | 2       | 0.02143  | 0.01224 | 0.007        | 0.0656       |
| 39   | 3      | 2       | 0.00714  | 0.00712 | 0.00101      | 0.0504       |
| 40   | 1      | 1       | 0        | NaN     | NA           | NA           |

**Table S163.** Salihli station Kaplan-Meier survival estimates according to SPI-6

|                                |
|--------------------------------|
| Kaplan-Meier Wet to Dry (SPI6) |
|--------------------------------|

|      |        |         |          |         |              |              |
|------|--------|---------|----------|---------|--------------|--------------|
|      |        | n       | events   | median  | 0.95LCL      | 0.95UCL      |
|      |        | 133     | 133      | 12      | 10           | 18           |
| time | n.risk | n.event | survival | std.err | lower 95% CL | upper 95% CL |
| 1    | 133    | 8       | 0.93985  | 0.02062 | 0.9003       | 0.9811       |
| 2    | 125    | 8       | 0.8797   | 0.02821 | 0.82611      | 0.9368       |
| 3    | 117    | 7       | 0.82707  | 0.03279 | 0.76523      | 0.8939       |
| 4    | 110    | 3       | 0.80451  | 0.03439 | 0.73986      | 0.8748       |
| 5    | 107    | 5       | 0.76692  | 0.03666 | 0.69833      | 0.8422       |
| 6    | 102    | 2       | 0.75188  | 0.03745 | 0.68194      | 0.829        |
| 7    | 100    | 6       | 0.70677  | 0.03947 | 0.63348      | 0.7885       |
| 8    | 94     | 6       | 0.66165  | 0.04103 | 0.58594      | 0.7472       |
| 9    | 88     | 6       | 0.61654  | 0.04216 | 0.53921      | 0.705        |
| 10   | 82     | 8       | 0.55639  | 0.04308 | 0.47805      | 0.6476       |
| 11   | 74     | 4       | 0.52632  | 0.0433  | 0.44795      | 0.6184       |
| 12   | 70     | 4       | 0.49624  | 0.04335 | 0.41814      | 0.5889       |
| 13   | 66     | 5       | 0.45865  | 0.04321 | 0.38132      | 0.5517       |
| 14   | 61     | 2       | 0.44361  | 0.04308 | 0.36672      | 0.5366       |
| 15   | 59     | 1       | 0.43609  | 0.043   | 0.35946      | 0.5291       |
| 16   | 58     | 1       | 0.42857  | 0.04291 | 0.35221      | 0.5215       |
| 17   | 57     | 2       | 0.41353  | 0.0427  | 0.33776      | 0.5063       |
| 18   | 55     | 3       | 0.39098  | 0.04231 | 0.31625      | 0.4834       |
| 19   | 52     | 3       | 0.36842  | 0.04183 | 0.29492      | 0.4602       |
| 20   | 49     | 3       | 0.34586  | 0.04124 | 0.27378      | 0.4369       |
| 21   | 46     | 2       | 0.33083  | 0.0408  | 0.25979      | 0.4213       |
| 22   | 44     | 3       | 0.30827  | 0.04004 | 0.23898      | 0.3976       |
| 23   | 41     | 3       | 0.28571  | 0.03917 | 0.21839      | 0.3738       |
| 24   | 38     | 3       | 0.26316  | 0.03818 | 0.19802      | 0.3497       |
| 25   | 35     | 2       | 0.24812  | 0.03745 | 0.18458      | 0.3335       |
| 26   | 33     | 2       | 0.23308  | 0.03666 | 0.17125      | 0.3172       |
| 27   | 31     | 3       | 0.21053  | 0.03535 | 0.15149      | 0.2926       |
| 28   | 28     | 1       | 0.20301  | 0.03488 | 0.14497      | 0.2843       |
| 29   | 27     | 1       | 0.19549  | 0.03439 | 0.13848      | 0.276        |
| 30   | 26     | 1       | 0.18797  | 0.03388 | 0.13203      | 0.2676       |
| 32   | 25     | 2       | 0.17293  | 0.03279 | 0.11925      | 0.2508       |
| 34   | 23     | 1       | 0.16541  | 0.03222 | 0.11292      | 0.2423       |
| 35   | 22     | 1       | 0.15789  | 0.03162 | 0.10664      | 0.2338       |
| 36   | 21     | 2       | 0.14286  | 0.03034 | 0.09421      | 0.2166       |
| 37   | 19     | 1       | 0.13534  | 0.02966 | 0.08808      | 0.208        |
| 38   | 18     | 2       | 0.1203   | 0.02821 | 0.07598      | 0.1905       |
| 39   | 16     | 3       | 0.09774  | 0.02575 | 0.05832      | 0.1638       |
| 40   | 13     | 1       | 0.09023  | 0.02484 | 0.0526       | 0.1548       |
| 41   | 12     | 1       | 0.08271  | 0.02388 | 0.04696      | 0.1457       |
| 42   | 11     | 2       | 0.06767  | 0.02178 | 0.03601      | 0.1272       |
| 43   | 9      | 2       | 0.05263  | 0.01936 | 0.02559      | 0.1082       |



|    |   |   |         |         |         |        |
|----|---|---|---------|---------|---------|--------|
| 44 | 7 | 1 | 0.04511 | 0.018   | 0.02064 | 0.0986 |
| 45 | 6 | 1 | 0.03759 | 0.01649 | 0.01591 | 0.0888 |
| 46 | 5 | 1 | 0.03008 | 0.01481 | 0.01146 | 0.079  |
| 47 | 4 | 1 | 0.02256 | 0.01288 | 0.00737 | 0.069  |
| 48 | 3 | 1 | 0.01504 | 0.01055 | 0.0038  | 0.0595 |
| 57 | 2 | 1 | 0.00752 | 0.00749 | 0.00107 | 0.053  |
| 91 | 1 | 1 | 0       | NaN     | NA      | NA     |

**Table S164.** Salihli station Kaplan-Meier survival estimates according to SPI-12

| Kaplan-Meier Wet to Dry (SPI12) |        |         |          |         |              |              |
|---------------------------------|--------|---------|----------|---------|--------------|--------------|
|                                 |        | n       | events   | median  | 0.95LCL      | 0.95UCL      |
|                                 |        | 130     | 130      | 25      | 21           | 29           |
| time                            | n.risk | n.event | survival | std.err | lower 95% CL | upper 95% CL |
| 1                               | 130    | 5       | 0.96154  | 0.01687 | 0.92904      | 0.9952       |
| 2                               | 125    | 6       | 0.91538  | 0.02441 | 0.86877      | 0.9645       |
| 3                               | 119    | 3       | 0.89231  | 0.02719 | 0.84058      | 0.9472       |
| 4                               | 116    | 3       | 0.86923  | 0.02957 | 0.81316      | 0.9292       |
| 5                               | 113    | 2       | 0.85385  | 0.03098 | 0.79523      | 0.9168       |
| 11                              | 111    | 1       | 0.84615  | 0.03164 | 0.78635      | 0.9105       |
| 12                              | 110    | 3       | 0.82308  | 0.03347 | 0.76003      | 0.8914       |
| 13                              | 107    | 4       | 0.79231  | 0.03558 | 0.72556      | 0.8652       |
| 14                              | 103    | 4       | 0.76154  | 0.03738 | 0.6917       | 0.8384       |
| 15                              | 99     | 4       | 0.73077  | 0.0389  | 0.65836      | 0.8111       |
| 16                              | 95     | 3       | 0.70769  | 0.03989 | 0.63367      | 0.7904       |
| 17                              | 92     | 4       | 0.67692  | 0.04102 | 0.60112      | 0.7623       |
| 18                              | 88     | 4       | 0.64615  | 0.04194 | 0.56897      | 0.7338       |
| 19                              | 84     | 3       | 0.62308  | 0.0425  | 0.5451       | 0.7122       |
| 20                              | 81     | 3       | 0.6      | 0.04297 | 0.52143      | 0.6904       |
| 21                              | 78     | 3       | 0.57692  | 0.04333 | 0.49795      | 0.6684       |
| 22                              | 75     | 3       | 0.55385  | 0.0436  | 0.47466      | 0.6462       |
| 23                              | 72     | 3       | 0.53077  | 0.04377 | 0.45156      | 0.6239       |
| 24                              | 69     | 3       | 0.50769  | 0.04385 | 0.42863      | 0.6013       |
| 25                              | 66     | 2       | 0.49231  | 0.04385 | 0.41345      | 0.5862       |
| 26                              | 64     | 3       | 0.46923  | 0.04377 | 0.39083      | 0.5634       |
| 27                              | 61     | 3       | 0.44615  | 0.0436  | 0.36839      | 0.5403       |
| 28                              | 58     | 3       | 0.42308  | 0.04333 | 0.34613      | 0.5171       |
| 29                              | 55     | 3       | 0.4      | 0.04297 | 0.32406      | 0.4937       |
| 30                              | 52     | 1       | 0.39231  | 0.04282 | 0.31675      | 0.4859       |
| 31                              | 51     | 1       | 0.38462  | 0.04267 | 0.30945      | 0.478        |
| 32                              | 50     | 1       | 0.37692  | 0.0425  | 0.30218      | 0.4702       |
| 33                              | 49     | 2       | 0.36154  | 0.04214 | 0.2877       | 0.4543       |
| 34                              | 47     | 2       | 0.34615  | 0.04173 | 0.27332      | 0.4384       |
| 35                              | 45     | 2       | 0.33077  | 0.04126 | 0.25902      | 0.4224       |

|     |    |   |         |         |         |        |
|-----|----|---|---------|---------|---------|--------|
| 36  | 43 | 3 | 0.30769 | 0.04048 | 0.23776 | 0.3982 |
| 37  | 40 | 3 | 0.28462 | 0.03958 | 0.21672 | 0.3738 |
| 38  | 37 | 2 | 0.26923 | 0.0389  | 0.20283 | 0.3574 |
| 39  | 35 | 2 | 0.25385 | 0.03817 | 0.18905 | 0.3409 |
| 40  | 33 | 1 | 0.24615 | 0.03778 | 0.1822  | 0.3325 |
| 41  | 32 | 1 | 0.23846 | 0.03738 | 0.17539 | 0.3242 |
| 42  | 31 | 1 | 0.23077 | 0.03695 | 0.16861 | 0.3158 |
| 43  | 30 | 1 | 0.22308 | 0.03651 | 0.16186 | 0.3075 |
| 44  | 29 | 1 | 0.21538 | 0.03605 | 0.15514 | 0.299  |
| 45  | 28 | 1 | 0.20769 | 0.03558 | 0.14846 | 0.2906 |
| 46  | 27 | 1 | 0.2     | 0.03508 | 0.14181 | 0.2821 |
| 47  | 26 | 1 | 0.19231 | 0.03457 | 0.13521 | 0.2735 |
| 48  | 25 | 1 | 0.18462 | 0.03403 | 0.12864 | 0.2649 |
| 49  | 24 | 1 | 0.17692 | 0.03347 | 0.12211 | 0.2563 |
| 50  | 23 | 1 | 0.16923 | 0.03289 | 0.11563 | 0.2477 |
| 69  | 22 | 1 | 0.16154 | 0.03228 | 0.10919 | 0.239  |
| 70  | 21 | 1 | 0.15385 | 0.03164 | 0.1028  | 0.2302 |
| 85  | 20 | 1 | 0.14615 | 0.03098 | 0.09646 | 0.2214 |
| 94  | 19 | 1 | 0.13846 | 0.03029 | 0.09018 | 0.2126 |
| 95  | 18 | 1 | 0.13077 | 0.02957 | 0.08395 | 0.2037 |
| 96  | 17 | 1 | 0.12308 | 0.02881 | 0.07779 | 0.1947 |
| 97  | 16 | 1 | 0.11538 | 0.02802 | 0.07169 | 0.1857 |
| 98  | 15 | 1 | 0.10769 | 0.02719 | 0.06566 | 0.1766 |
| 99  | 14 | 1 | 0.1     | 0.02631 | 0.05971 | 0.1675 |
| 100 | 13 | 1 | 0.09231 | 0.02539 | 0.05384 | 0.1582 |
| 101 | 12 | 1 | 0.08462 | 0.02441 | 0.04807 | 0.1489 |
| 102 | 11 | 1 | 0.07692 | 0.02337 | 0.04241 | 0.1395 |
| 103 | 10 | 1 | 0.06923 | 0.02226 | 0.03686 | 0.13   |
| 104 | 9  | 1 | 0.06154 | 0.02108 | 0.03145 | 0.1204 |
| 136 | 8  | 1 | 0.05385 | 0.0198  | 0.02619 | 0.1107 |
| 137 | 7  | 1 | 0.04615 | 0.0184  | 0.02113 | 0.1008 |
| 138 | 6  | 1 | 0.03846 | 0.01687 | 0.01628 | 0.0908 |
| 139 | 5  | 1 | 0.03077 | 0.01515 | 0.01173 | 0.0807 |
| 140 | 4  | 1 | 0.02308 | 0.01317 | 0.00754 | 0.0706 |
| 141 | 3  | 1 | 0.01538 | 0.01079 | 0.00389 | 0.0609 |
| 142 | 2  | 1 | 0.00769 | 0.00766 | 0.00109 | 0.0542 |
| 143 | 1  | 1 | 0       | NaN     | NA      | NA     |

**Table S165.** Salihli station Kaplan-Meier drought risk estimates according to SPI-3, 6, and 12

| Drought Risk (SPI3) |              | Drought Risk (SPI6) |              | Drought Risk (SPI12) |              |
|---------------------|--------------|---------------------|--------------|----------------------|--------------|
| Time                | Drought Risk | Time                | Drought Risk | Time                 | Drought Risk |
| 1                   | 0.04286      | 1                   | 0.06015      | 1                    | 0.03846      |
| 2                   | 0.07857      | 2                   | 0.1203       | 2                    | 0.08462      |

|    |         |    |         |    |          |
|----|---------|----|---------|----|----------|
| 3  | 0.12143 | 3  | 0.17293 | 3  | 0.10769  |
| 4  | 0.17143 | 4  | 0.19549 | 4  | 0.13077  |
| 5  | 0.20714 | 5  | 0.23308 | 5  | 0.14615  |
| 6  | 0.24286 | 6  | 0.24812 | 6  | 0.147433 |
| 7  | 0.31429 | 7  | 0.29323 | 11 | 0.15385  |
| 8  | 0.35714 | 8  | 0.33835 | 12 | 0.17692  |
| 9  | 0.41429 | 9  | 0.38346 | 13 | 0.20769  |
| 10 | 0.44286 | 10 | 0.44361 | 14 | 0.23846  |
| 11 | 0.47857 | 11 | 0.47368 | 15 | 0.26923  |
| 12 | 0.50714 | 12 | 0.50376 | 16 | 0.29231  |
| 13 | 0.54286 | 13 | 0.54135 | 17 | 0.32308  |
| 14 | 0.59286 | 14 | 0.55639 | 18 | 0.35385  |
| 15 | 0.64286 | 15 | 0.56391 | 19 | 0.37692  |
| 16 | 0.69286 | 16 | 0.57143 | 20 | 0.4      |
| 17 | 0.73571 | 17 | 0.58647 | 21 | 0.42308  |
| 18 | 0.77143 | 18 | 0.60902 | 22 | 0.44615  |
| 19 | 0.78571 | 19 | 0.63158 | 23 | 0.46923  |
| 20 | 0.8     | 20 | 0.65414 | 24 | 0.49231  |
| 21 | 0.81429 | 21 | 0.66917 | 25 | 0.50769  |
| 22 | 0.82857 | 22 | 0.69173 | 26 | 0.53077  |
| 23 | 0.83571 | 23 | 0.71429 | 27 | 0.55385  |
| 24 | 0.85    | 24 | 0.73684 | 28 | 0.57692  |
| 25 | 0.86429 | 25 | 0.75188 | 29 | 0.6      |
| 26 | 0.87857 | 26 | 0.76692 | 30 | 0.60769  |
| 27 | 0.9     | 27 | 0.78947 | 31 | 0.61538  |
| 28 | 0.92143 | 28 | 0.79699 | 32 | 0.62308  |
| 29 | 0.92857 | 29 | 0.80451 | 33 | 0.63846  |
| 30 | 0.93571 | 30 | 0.81203 | 34 | 0.65385  |
| 31 | 0.94286 | 32 | 0.82707 | 35 | 0.66923  |
| 32 | 0.95    | 34 | 0.83459 | 36 | 0.69231  |
| 33 | 0.95714 | 35 | 0.84211 | 37 | 0.71538  |
| 37 | 0.96429 | 36 | 0.85714 | 38 | 0.73077  |
| 38 | 0.97857 | 37 | 0.86466 | 39 | 0.74615  |
| 39 | 0.99286 | 38 | 0.8797  | 40 | 0.75385  |
| 40 | 1       | 39 | 0.90226 | 41 | 0.76154  |
|    |         | 40 | 0.90977 | 42 | 0.76923  |
|    |         | 41 | 0.91729 | 43 | 0.77692  |
|    |         | 42 | 0.93233 | 44 | 0.78462  |
|    |         | 43 | 0.94737 | 45 | 0.79231  |
|    |         | 44 | 0.95489 | 46 | 0.8      |
|    |         | 45 | 0.96241 | 47 | 0.80769  |
|    |         | 46 | 0.96992 | 48 | 0.81538  |
|    |         | 47 | 0.97744 | 49 | 0.82308  |
|    |         | 48 | 0.98496 | 50 | 0.83077  |

|    |         |     |         |
|----|---------|-----|---------|
| 57 | 0.99248 | 69  | 0.83846 |
| 91 | 1       | 70  | 0.84615 |
|    |         | 85  | 0.85385 |
|    |         | 94  | 0.86154 |
|    |         | 95  | 0.86923 |
|    |         | 96  | 0.87692 |
|    |         | 97  | 0.88462 |
|    |         | 98  | 0.89231 |
|    |         | 99  | 0.9     |
|    |         | 100 | 0.90769 |
|    |         | 101 | 0.91538 |
|    |         | 102 | 0.92308 |
|    |         | 103 | 0.93077 |
|    |         | 104 | 0.93846 |
|    |         | 136 | 0.94615 |
|    |         | 137 | 0.95385 |
|    |         | 138 | 0.96154 |
|    |         | 139 | 0.96923 |
|    |         | 140 | 0.97692 |
|    |         | 141 | 0.98462 |
|    |         | 142 | 0.99231 |
|    |         | 143 | 1       |

**Table S166.** Salihli station Kaplan-Meier survival estimates according to SPEI-3

| Kaplan-Meier Wet to Dry (SPEI3) |        |         |          |         |              |              |
|---------------------------------|--------|---------|----------|---------|--------------|--------------|
|                                 |        | n       | events   | median  | 0.95LCL      | 0.95UCL      |
|                                 |        | 85      | 85       | 8       | 6            | 10           |
| time                            | n.risk | n.event | survival | std.err | lower 95% CI | upper 95% CI |
| 1                               | 85     | 4       | 0.9529   | 0.023   | 0.90897      | 0.999        |
| 2                               | 81     | 2       | 0.9294   | 0.0278  | 0.87652      | 0.9855       |
| 3                               | 79     | 7       | 0.8471   | 0.039   | 0.7739       | 0.9271       |
| 4                               | 72     | 7       | 0.7647   | 0.046   | 0.67964      | 0.8604       |
| 5                               | 65     | 8       | 0.6706   | 0.051   | 0.57776      | 0.7783       |
| 6                               | 57     | 9       | 0.5647   | 0.0538  | 0.46856      | 0.6806       |
| 7                               | 48     | 5       | 0.5059   | 0.0542  | 0.41002      | 0.6242       |
| 8                               | 43     | 6       | 0.4353   | 0.0538  | 0.34168      | 0.5546       |
| 9                               | 37     | 2       | 0.4118   | 0.0534  | 0.31937      | 0.5309       |
| 10                              | 35     | 5       | 0.3529   | 0.0518  | 0.26466      | 0.4707       |
| 11                              | 30     | 2       | 0.3294   | 0.051   | 0.24323      | 0.4461       |

|    |    |   |        |        |         |        |
|----|----|---|--------|--------|---------|--------|
| 12 | 28 | 2 | 0.3059 | 0.05   | 0.22206 | 0.4213 |
| 13 | 26 | 2 | 0.2824 | 0.0488 | 0.20119 | 0.3963 |
| 14 | 24 | 2 | 0.2588 | 0.0475 | 0.18062 | 0.3709 |
| 15 | 22 | 2 | 0.2353 | 0.046  | 0.16039 | 0.3452 |
| 16 | 20 | 1 | 0.2235 | 0.0452 | 0.1504  | 0.3322 |
| 21 | 19 | 1 | 0.2118 | 0.0443 | 0.14052 | 0.3191 |
| 22 | 18 | 3 | 0.1765 | 0.0413 | 0.11149 | 0.2793 |
| 23 | 15 | 2 | 0.1529 | 0.039  | 0.09274 | 0.2522 |
| 24 | 13 | 1 | 0.1412 | 0.0378 | 0.08357 | 0.2385 |
| 25 | 12 | 2 | 0.1176 | 0.0349 | 0.06573 | 0.2106 |
| 30 | 10 | 1 | 0.1059 | 0.0334 | 0.05709 | 0.1964 |
| 31 | 9  | 1 | 0.0941 | 0.0317 | 0.04867 | 0.182  |
| 39 | 8  | 1 | 0.0824 | 0.0298 | 0.0405  | 0.1674 |
| 40 | 7  | 1 | 0.0706 | 0.0278 | 0.03264 | 0.1527 |
| 41 | 6  | 1 | 0.0588 | 0.0255 | 0.02513 | 0.1377 |
| 42 | 5  | 1 | 0.0471 | 0.023  | 0.01808 | 0.1225 |
| 43 | 4  | 2 | 0.0235 | 0.0164 | 0.00598 | 0.0926 |
| 46 | 2  | 1 | 0.0118 | 0.0117 | 0.00168 | 0.0826 |
| 56 | 1  | 1 | 0      | NaN    | NA      | NA     |

**Table S167.** Salihli station Kaplan-Meier survival estimates according to SPEI-6

| Kaplan-Meier Wet to Dry (SPEI6) |        |         |          |         |              |              |
|---------------------------------|--------|---------|----------|---------|--------------|--------------|
|                                 |        | n       | events   | median  | 0.95LCL      | 0.95UCL      |
|                                 |        | 91      | 91       | 10      | 8            | 13           |
| time                            | n.risk | n.event | survival | std.err | lower 95% CI | upper 95% CI |
| 1                               | 91     | 6       | 0.9341   | 0.026   | 0.88444      | 0.9865       |
| 2                               | 85     | 9       | 0.8352   | 0.0389  | 0.76231      | 0.915        |
| 3                               | 76     | 8       | 0.7473   | 0.0456  | 0.66309      | 0.8421       |
| 4                               | 68     | 5       | 0.6923   | 0.0484  | 0.60369      | 0.7939       |
| 5                               | 63     | 2       | 0.6703   | 0.0493  | 0.58038      | 0.7742       |
| 6                               | 61     | 2       | 0.6484   | 0.0501  | 0.55731      | 0.7543       |
| 7                               | 59     | 4       | 0.6044   | 0.0513  | 0.51184      | 0.7137       |
| 8                               | 55     | 4       | 0.5604   | 0.052   | 0.4672       | 0.6723       |
| 9                               | 51     | 5       | 0.5055   | 0.0524  | 0.41254      | 0.6194       |
| 10                              | 46     | 3       | 0.4725   | 0.0523  | 0.38032      | 0.5871       |
| 11                              | 43     | 3       | 0.4396   | 0.052   | 0.34855      | 0.5543       |
| 12                              | 40     | 3       | 0.4066   | 0.0515  | 0.31722      | 0.5211       |
| 13                              | 37     | 3       | 0.3736   | 0.0507  | 0.28635      | 0.4875       |
| 14                              | 34     | 3       | 0.3407   | 0.0497  | 0.25597      | 0.4534       |
| 15                              | 31     | 2       | 0.3187   | 0.0488  | 0.23599      | 0.4304       |
| 16                              | 29     | 1       | 0.3077   | 0.0484  | 0.22608      | 0.4188       |
| 17                              | 28     | 1       | 0.2967   | 0.0479  | 0.21624      | 0.4071       |

|    |    |   |        |        |         |        |
|----|----|---|--------|--------|---------|--------|
| 18 | 27 | 2 | 0.2747 | 0.0468 | 0.19675 | 0.3836 |
| 21 | 25 | 1 | 0.2637 | 0.0462 | 0.1871  | 0.3718 |
| 24 | 24 | 2 | 0.2418 | 0.0449 | 0.16802 | 0.3479 |
| 25 | 22 | 1 | 0.2308 | 0.0442 | 0.15859 | 0.3358 |
| 26 | 21 | 1 | 0.2198 | 0.0434 | 0.14923 | 0.3237 |
| 27 | 20 | 2 | 0.1978 | 0.0418 | 0.13078 | 0.2992 |
| 28 | 18 | 1 | 0.1868 | 0.0409 | 0.12169 | 0.2868 |
| 29 | 17 | 1 | 0.1758 | 0.0399 | 0.11269 | 0.2743 |
| 30 | 16 | 2 | 0.1538 | 0.0378 | 0.09502 | 0.2491 |
| 31 | 14 | 2 | 0.1319 | 0.0355 | 0.07784 | 0.2234 |
| 32 | 12 | 1 | 0.1209 | 0.0342 | 0.06946 | 0.2104 |
| 37 | 11 | 1 | 0.1099 | 0.0328 | 0.06124 | 0.1972 |
| 38 | 10 | 1 | 0.0989 | 0.0313 | 0.05319 | 0.1839 |
| 39 | 9  | 2 | 0.0769 | 0.0279 | 0.03775 | 0.1567 |
| 40 | 7  | 1 | 0.0659 | 0.026  | 0.03043 | 0.1429 |
| 41 | 6  | 1 | 0.0549 | 0.0239 | 0.02344 | 0.1288 |
| 42 | 5  | 1 | 0.044  | 0.0215 | 0.01686 | 0.1146 |
| 43 | 4  | 1 | 0.033  | 0.0187 | 0.01083 | 0.1003 |
| 44 | 3  | 1 | 0.022  | 0.0154 | 0.00558 | 0.0865 |
| 66 | 2  | 1 | 0.011  | 0.0109 | 0.00156 | 0.0772 |
| 90 | 1  | 1 | 0      | NaN    | NA      | NA     |

**Table S168.** Salihli station Kaplan-Meier survival estimates according to SPEI-12

| Kaplan-Meier Wet to Dry (SPEI12) |        |         |          |         |              |              |
|----------------------------------|--------|---------|----------|---------|--------------|--------------|
|                                  |        | n       | events   | median  | 0.95LCL      | 0.95UCL      |
|                                  |        | 97      | 97       | 18      | 15           | 24           |
| time                             | n.risk | n.event | survival | std.err | lower 95% CI | upper 95% CI |
| 1                                | 97     | 3       | 0.9691   | 0.0176  | 0.93523      | 10.000       |
| 2                                | 94     | 4       | 0.9278   | 0.0263  | 0.87774      | 0.9808       |
| 3                                | 90     | 3       | 0.8969   | 0.0309  | 0.83839      | 0.9595       |
| 4                                | 87     | 2       | 0.8763   | 0.0334  | 0.81316      | 0.9443       |
| 5                                | 85     | 2       | 0.8557   | 0.0357  | 0.78852      | 0.9285       |
| 6                                | 83     | 1       | 0.8454   | 0.0367  | 0.77639      | 0.9205       |
| 7                                | 82     | 1       | 0.8351   | 0.0377  | 0.76437      | 0.9123       |
| 8                                | 81     | 2       | 0.8144   | 0.0395  | 0.74063      | 0.8956       |
| 9                                | 79     | 2       | 0.7938   | 0.0411  | 0.71725      | 0.8785       |
| 10                               | 77     | 2       | 0.7732   | 0.0425  | 0.69419      | 0.8612       |
| 11                               | 75     | 1       | 0.7629   | 0.0432  | 0.68277      | 0.8524       |
| 12                               | 74     | 3       | 0.732    | 0.045   | 0.64891      | 0.8256       |
| 13                               | 71     | 5       | 0.6804   | 0.0473  | 0.59366      | 0.7798       |
| 14                               | 66     | 5       | 0.6289   | 0.0491  | 0.53971      | 0.7327       |
| 15                               | 61     | 4       | 0.5876   | 0.05    | 0.4974       | 0.6942       |

|     |    |   |        |        |         |        |
|-----|----|---|--------|--------|---------|--------|
| 16  | 57 | 4 | 0.5464 | 0.0505 | 0.45578 | 0.655  |
| 17  | 53 | 4 | 0.5052 | 0.0508 | 0.41484 | 0.6151 |
| 18  | 49 | 4 | 0.4639 | 0.0506 | 0.37457 | 0.5746 |
| 19  | 45 | 2 | 0.4433 | 0.0504 | 0.35469 | 0.554  |
| 20  | 43 | 2 | 0.4227 | 0.0502 | 0.33497 | 0.5334 |
| 21  | 41 | 1 | 0.4124 | 0.05   | 0.32518 | 0.5229 |
| 23  | 40 | 1 | 0.4021 | 0.0498 | 0.31542 | 0.5125 |
| 24  | 39 | 2 | 0.3814 | 0.0493 | 0.29605 | 0.4915 |
| 25  | 37 | 1 | 0.3711 | 0.0491 | 0.28644 | 0.4809 |
| 26  | 36 | 1 | 0.3608 | 0.0488 | 0.27686 | 0.4702 |
| 27  | 35 | 1 | 0.3505 | 0.0484 | 0.26734 | 0.4596 |
| 28  | 34 | 1 | 0.3402 | 0.0481 | 0.25786 | 0.4489 |
| 29  | 33 | 1 | 0.3299 | 0.0477 | 0.24843 | 0.4381 |
| 30  | 32 | 1 | 0.3196 | 0.0473 | 0.23905 | 0.4273 |
| 31  | 31 | 1 | 0.3093 | 0.0469 | 0.22972 | 0.4164 |
| 32  | 30 | 1 | 0.299  | 0.0465 | 0.22044 | 0.4055 |
| 33  | 29 | 1 | 0.2887 | 0.046  | 0.21121 | 0.3945 |
| 34  | 28 | 1 | 0.2784 | 0.0455 | 0.20204 | 0.3835 |
| 35  | 27 | 2 | 0.2577 | 0.0444 | 0.18386 | 0.3613 |
| 36  | 25 | 2 | 0.2371 | 0.0432 | 0.16593 | 0.3388 |
| 37  | 23 | 3 | 0.2062 | 0.0411 | 0.13953 | 0.3047 |
| 38  | 20 | 2 | 0.1856 | 0.0395 | 0.1223  | 0.2816 |
| 39  | 18 | 1 | 0.1753 | 0.0386 | 0.11381 | 0.2699 |
| 40  | 17 | 1 | 0.1649 | 0.0377 | 0.10541 | 0.2581 |
| 41  | 16 | 1 | 0.1546 | 0.0367 | 0.09711 | 0.2463 |
| 42  | 15 | 1 | 0.1443 | 0.0357 | 0.0889  | 0.2343 |
| 43  | 14 | 1 | 0.134  | 0.0346 | 0.08081 | 0.2223 |
| 52  | 13 | 1 | 0.1237 | 0.0334 | 0.07284 | 0.2101 |
| 53  | 12 | 1 | 0.1134 | 0.0322 | 0.06501 | 0.1978 |
| 65  | 11 | 1 | 0.1031 | 0.0309 | 0.05732 | 0.1854 |
| 134 | 10 | 1 | 0.0928 | 0.0295 | 0.0498  | 0.1729 |
| 135 | 9  | 1 | 0.0825 | 0.0279 | 0.04247 | 0.1602 |
| 136 | 8  | 1 | 0.0722 | 0.0263 | 0.03535 | 0.1473 |
| 137 | 7  | 1 | 0.0619 | 0.0245 | 0.0285  | 0.1343 |
| 138 | 6  | 1 | 0.0515 | 0.0225 | 0.02195 | 0.121  |
| 139 | 5  | 1 | 0.0412 | 0.0202 | 0.0158  | 0.1077 |
| 140 | 4  | 1 | 0.0309 | 0.0176 | 0.01015 | 0.0942 |
| 141 | 3  | 1 | 0.0206 | 0.0144 | 0.00523 | 0.0813 |
| 142 | 2  | 1 | 0.0103 | 0.0103 | 0.00147 | 0.0724 |
| 143 | 1  | 1 | 0      | NaN    | NA      | NA     |

**Table S169.** Salihli station Kaplan-Meier drought risk estimates according to SPEI-3, 6, and 12

| Drought Risk (SPEI3) | Drought Risk (SPEI6) | Drought Risk (SPEI12) |
|----------------------|----------------------|-----------------------|
|----------------------|----------------------|-----------------------|

| Time | Drought Risk | Time | Drought Risk | Time | Drought Risk |
|------|--------------|------|--------------|------|--------------|
| 1    | 0.0471       | 1    | 0.0659       | 1    | 0.0309       |
| 2    | 0.0706       | 2    | 0.1648       | 2    | 0.0722       |
| 3    | 0.1529       | 3    | 0.2527       | 3    | 0.1031       |
| 4    | 0.2353       | 4    | 0.3077       | 4    | 0.1237       |
| 5    | 0.3294       | 5    | 0.3297       | 5    | 0.1443       |
| 6    | 0.4353       | 6    | 0.3516       | 6    | 0.1546       |
| 7    | 0.4941       | 7    | 0.3956       | 7    | 0.1649       |
| 8    | 0.5647       | 8    | 0.4396       | 8    | 0.1856       |
| 9    | 0.5882       | 9    | 0.4945       | 9    | 0.2062       |
| 10   | 0.6471       | 10   | 0.5275       | 10   | 0.2268       |
| 11   | 0.6706       | 11   | 0.5604       | 11   | 0.2371       |
| 12   | 0.6941       | 12   | 0.5934       | 12   | 0.268        |
| 13   | 0.7176       | 13   | 0.6264       | 13   | 0.3196       |
| 14   | 0.7412       | 14   | 0.6593       | 14   | 0.3711       |
| 15   | 0.7647       | 15   | 0.6813       | 15   | 0.4124       |
| 16   | 0.7765       | 16   | 0.6923       | 16   | 0.4536       |
| 21   | 0.7882       | 17   | 0.7033       | 17   | 0.4948       |
| 22   | 0.8235       | 18   | 0.7253       | 18   | 0.5361       |
| 23   | 0.8471       | 21   | 0.7363       | 19   | 0.5567       |
| 24   | 0.8588       | 24   | 0.7582       | 20   | 0.5773       |
| 25   | 0.8824       | 25   | 0.7692       | 21   | 0.5876       |
| 30   | 0.8941       | 26   | 0.7802       | 23   | 0.5979       |
| 31   | 0.9059       | 27   | 0.8022       | 24   | 0.6186       |
| 39   | 0.9176       | 28   | 0.8132       | 25   | 0.6289       |
| 40   | 0.9294       | 29   | 0.8242       | 26   | 0.6392       |
| 41   | 0.9412       | 30   | 0.8462       | 27   | 0.6495       |
| 42   | 0.9529       | 31   | 0.8681       | 28   | 0.6598       |
| 43   | 0.9765       | 32   | 0.8791       | 29   | 0.6701       |
| 46   | 0.9882       | 37   | 0.8901       | 30   | 0.6804       |
| 56   | 1            | 38   | 0.9011       | 31   | 0.6907       |
|      |              | 39   | 0.9231       | 32   | 0.701        |
|      |              | 40   | 0.9341       | 33   | 0.7113       |
|      |              | 41   | 0.9451       | 34   | 0.7216       |
|      |              | 42   | 0.956        | 35   | 0.7423       |
|      |              | 43   | 0.967        | 36   | 0.7629       |
|      |              | 44   | 0.978        | 37   | 0.7938       |
|      |              | 66   | 0.989        | 38   | 0.8144       |
|      |              | 90   | 1            | 39   | 0.8247       |
|      |              |      |              | 40   | 0.8351       |
|      |              |      |              | 41   | 0.8454       |
|      |              |      |              | 42   | 0.8557       |
|      |              |      |              | 43   | 0.866        |
|      |              |      |              | 52   | 0.8763       |



|     |        |
|-----|--------|
| 53  | 0.8866 |
| 65  | 0.8969 |
| 134 | 0.9072 |
| 135 | 0.9175 |
| 136 | 0.9278 |
| 137 | 0.9381 |
| 138 | 0.9485 |
| 139 | 0.9588 |
| 140 | 0.9691 |
| 141 | 0.9794 |
| 142 | 0.9897 |
| 143 | 1      |

**Table S170.** Sarigol station Kaplan-Meier survival estimates according to SPI-3

| Kaplan-Meier Wet to Dry (SPI3) |        |         |          |         |              |              |
|--------------------------------|--------|---------|----------|---------|--------------|--------------|
|                                |        | n       | events   | median  | 0.95LCL      | 0.95UCL      |
|                                |        | 45      | 45       | 7       | 6            | 9            |
| time                           | n.risk | n.event | survival | std.err | lower 95% CL | upper 95% CL |
| 2                              | 45     | 2       | 0.9556   | 0.0307  | 0.8972       | 1            |
| 3                              | 43     | 4       | 0.8667   | 0.0507  | 0.7728       | 0.972        |
| 4                              | 39     | 7       | 0.7111   | 0.0676  | 0.5903       | 0.857        |
| 5                              | 32     | 3       | 0.6444   | 0.0714  | 0.5187       | 0.801        |
| 6                              | 29     | 4       | 0.5556   | 0.0741  | 0.4278       | 0.721        |
| 7                              | 25     | 5       | 0.4444   | 0.0741  | 0.3206       | 0.616        |
| 8                              | 20     | 4       | 0.3556   | 0.0714  | 0.2399       | 0.527        |
| 9                              | 16     | 2       | 0.3111   | 0.069   | 0.2014       | 0.481        |
| 10                             | 14     | 3       | 0.2444   | 0.0641  | 0.1462       | 0.409        |
| 11                             | 11     | 3       | 0.1778   | 0.057   | 0.0948       | 0.333        |
| 14                             | 8      | 1       | 0.1556   | 0.054   | 0.0787       | 0.307        |
| 17                             | 7      | 1       | 0.1333   | 0.0507  | 0.0633       | 0.281        |
| 18                             | 6      | 1       | 0.1111   | 0.0468  | 0.0486       | 0.254        |
| 19                             | 5      | 2       | 0.0667   | 0.0372  | 0.0223       | 0.199        |
| 21                             | 3      | 1       | 0.0444   | 0.0307  | 0.0115       | 0.172        |
| 23                             | 2      | 1       | 0.0222   | 0.022   | 0.0032       | 0.154        |
| 27                             | 1      | 1       | 0        | NaN     | NA           | NA           |

**Table S171.** Sarigol station Kaplan-Meier survival estimates according to SPI-6

| Kaplan-Meier Wet to Dry (SPI6) |        |         |          |         |              |              |
|--------------------------------|--------|---------|----------|---------|--------------|--------------|
|                                |        | n       | events   | median  | 0.95LCL      | 0.95UCL      |
|                                |        | 50      | 50       | 8       | 6            | 11           |
| time                           | n.risk | n.event | survival | std.err | lower 95% CL | upper 95% CL |

|    |    |   |      |        |         |       |
|----|----|---|------|--------|---------|-------|
| 1  | 50 | 4 | 0.92 | 0.0384 | 0.84779 | 0.998 |
| 2  | 46 | 1 | 0.9  | 0.0424 | 0.82057 | 0.987 |
| 3  | 45 | 2 | 0.86 | 0.0491 | 0.769   | 0.962 |
| 4  | 43 | 4 | 0.78 | 0.0586 | 0.67323 | 0.904 |
| 5  | 39 | 3 | 0.72 | 0.0635 | 0.60571 | 0.856 |
| 6  | 36 | 5 | 0.62 | 0.0686 | 0.49906 | 0.77  |
| 7  | 31 | 4 | 0.54 | 0.0705 | 0.41811 | 0.697 |
| 8  | 27 | 4 | 0.46 | 0.0705 | 0.34067 | 0.621 |
| 9  | 23 | 3 | 0.4  | 0.0693 | 0.28486 | 0.562 |
| 10 | 20 | 3 | 0.34 | 0.067  | 0.23108 | 0.5   |
| 11 | 17 | 4 | 0.26 | 0.062  | 0.16289 | 0.415 |
| 12 | 13 | 2 | 0.22 | 0.0586 | 0.13054 | 0.371 |
| 13 | 11 | 1 | 0.2  | 0.0566 | 0.11489 | 0.348 |
| 22 | 10 | 1 | 0.18 | 0.0543 | 0.09962 | 0.325 |
| 27 | 9  | 1 | 0.16 | 0.0518 | 0.08478 | 0.302 |
| 28 | 8  | 1 | 0.14 | 0.0491 | 0.07043 | 0.278 |
| 30 | 7  | 1 | 0.12 | 0.046  | 0.05665 | 0.254 |
| 32 | 6  | 1 | 0.1  | 0.0424 | 0.04354 | 0.23  |
| 33 | 5  | 1 | 0.08 | 0.0384 | 0.03125 | 0.205 |
| 48 | 4  | 1 | 0.06 | 0.0336 | 0.02003 | 0.18  |
| 49 | 3  | 1 | 0.04 | 0.0277 | 0.01029 | 0.156 |
| 50 | 2  | 1 | 0.02 | 0.0198 | 0.00287 | 0.139 |
| 51 | 1  | 1 | 0    | NaN    | NA      | NA    |

**Table S172.** Sarigol station Kaplan-Meier survival estimates according to SPI-12

| Kaplan-Meier Wet to Dry (SPI12) |        |         |          |         |              |              |
|---------------------------------|--------|---------|----------|---------|--------------|--------------|
|                                 |        | n       | events   | median  | 0.95LCL      | 0.95UCL      |
|                                 |        | 44      | 44       | 7       | 5            | 36           |
| time                            | n.risk | n.event | survival | std.err | lower 95% CL | upper 95% CL |
| 1                               | 44     | 1       | 0.9773   | 0.0225  | 0.93421      | 1            |
| 2                               | 43     | 4       | 0.8864   | 0.0478  | 0.79738      | 0.985        |
| 3                               | 39     | 4       | 0.7955   | 0.0608  | 0.68477      | 0.924        |
| 4                               | 35     | 4       | 0.7045   | 0.0688  | 0.58185      | 0.853        |
| 5                               | 31     | 4       | 0.6136   | 0.0734  | 0.48539      | 0.776        |
| 6                               | 27     | 3       | 0.5455   | 0.0751  | 0.4165       | 0.714        |
| 7                               | 24     | 3       | 0.4773   | 0.0753  | 0.35033      | 0.65         |
| 8                               | 21     | 2       | 0.4318   | 0.0747  | 0.30768      | 0.606        |
| 9                               | 19     | 2       | 0.3864   | 0.0734  | 0.26624      | 0.561        |
| 10                              | 17     | 1       | 0.3636   | 0.0725  | 0.24599      | 0.538        |
| 11                              | 16     | 1       | 0.3409   | 0.0715  | 0.22605      | 0.514        |
| 36                              | 15     | 2       | 0.2955   | 0.0688  | 0.18721      | 0.466        |
| 41                              | 13     | 1       | 0.2727   | 0.0671  | 0.16834      | 0.442        |
| 42                              | 12     | 1       | 0.25     | 0.0653  | 0.14986      | 0.417        |

|    |    |   |        |        |         |       |
|----|----|---|--------|--------|---------|-------|
| 48 | 11 | 1 | 0.2273 | 0.0632 | 0.1318  | 0.392 |
| 49 | 10 | 2 | 0.1818 | 0.0581 | 0.09715 | 0.34  |
| 50 | 8  | 2 | 0.1364 | 0.0517 | 0.06483 | 0.287 |
| 51 | 6  | 1 | 0.1136 | 0.0478 | 0.04979 | 0.259 |
| 52 | 5  | 1 | 0.0909 | 0.0433 | 0.03571 | 0.231 |
| 53 | 4  | 1 | 0.0682 | 0.038  | 0.02287 | 0.203 |
| 54 | 3  | 1 | 0.0455 | 0.0314 | 0.01174 | 0.176 |
| 55 | 2  | 1 | 0.0227 | 0.0225 | 0.00327 | 0.158 |
| 56 | 1  | 1 | 0      | NaN    | NA      | NA    |

**Table S173.** Sarigol station Kaplan-Meier drought risk estimates according to SPI-3, 6, and 12

| Drought Risk (SPI3) |              | Drought Risk (SPI6) |              | Drought Risk (SPI12) |              |
|---------------------|--------------|---------------------|--------------|----------------------|--------------|
| Time                | Drought Risk | Time                | Drought Risk | Time                 | Drought Risk |
| 2                   | 0.0444       | 1                   | 0.08         | 1                    | 0.0227       |
| 3                   | 0.1333       | 2                   | 0.1          | 2                    | 0.1136       |
| 4                   | 0.2889       | 3                   | 0.14         | 3                    | 0.2045       |
| 5                   | 0.3556       | 4                   | 0.22         | 4                    | 0.2955       |
| 6                   | 0.4444       | 5                   | 0.28         | 5                    | 0.3864       |
| 7                   | 0.5556       | 6                   | 0.38         | 6                    | 0.4545       |
| 8                   | 0.6444       | 7                   | 0.46         | 7                    | 0.5227       |
| 9                   | 0.6889       | 8                   | 0.54         | 8                    | 0.5682       |
| 10                  | 0.7556       | 9                   | 0.6          | 9                    | 0.6136       |
| 11                  | 0.8222       | 10                  | 0.66         | 10                   | 0.6364       |
| 12                  | 0.7402       | 11                  | 0.74         | 11                   | 0.6591       |
| 14                  | 0.8444       | 12                  | 0.78         | 12                   | 0.660916     |
| 17                  | 0.8667       | 13                  | 0.8          | 36                   | 0.7045       |
| 18                  | 0.8889       | 22                  | 0.82         | 41                   | 0.7273       |
| 19                  | 0.9333       | 27                  | 0.84         | 42                   | 0.75         |
| 21                  | 0.9556       | 28                  | 0.86         | 48                   | 0.7727       |
| 23                  | 0.9778       | 30                  | 0.88         | 49                   | 0.8182       |
| 27                  | 1            | 32                  | 0.9          | 50                   | 0.8636       |
|                     |              | 33                  | 0.92         | 51                   | 0.8864       |
|                     |              | 48                  | 0.94         | 52                   | 0.9091       |
|                     |              | 49                  | 0.96         | 53                   | 0.9318       |
|                     |              | 50                  | 0.98         | 54                   | 0.9545       |
|                     |              | 51                  | 1            | 55                   | 0.9773       |
|                     |              |                     |              | 56                   | 1            |

**Table S174.** Sarigol station Kaplan-Meier survival estimates according to SPEI-3

| Kaplan-Meier Wet to Dry (SPEI3) |  |    |        |        |         |         |
|---------------------------------|--|----|--------|--------|---------|---------|
|                                 |  | n  | events | median | 0.95LCL | 0.95UCL |
|                                 |  | 43 | 43     | 9      | 7       | 10      |

| time | n.risk | n.event | survival | std.err | lower 95% CI | upper 95% CI |
|------|--------|---------|----------|---------|--------------|--------------|
| 1    | 43     | 2       | 0.9535   | 0.0321  | 0.89258      | 1.000        |
| 2    | 41     | 1       | 0.9302   | 0.0388  | 0.85712      | 1.000        |
| 3    | 40     | 4       | 0.8372   | 0.0563  | 0.73383      | 0.955        |
| 4    | 36     | 3       | 0.7674   | 0.0644  | 0.65101      | 0.905        |
| 5    | 33     | 3       | 0.6977   | 0.07    | 0.57306      | 0.849        |
| 6    | 30     | 2       | 0.6512   | 0.0727  | 0.52322      | 0.81         |
| 7    | 28     | 3       | 0.5814   | 0.0752  | 0.45116      | 0.749        |
| 8    | 25     | 3       | 0.5116   | 0.0762  | 0.38206      | 0.685        |
| 9    | 22     | 5       | 0.3953   | 0.0746  | 0.27318      | 0.572        |
| 10   | 17     | 4       | 0.3023   | 0.07    | 0.19199      | 0.476        |
| 11   | 13     | 3       | 0.2326   | 0.0644  | 0.13512      | 0.4          |
| 14   | 10     | 2       | 0.186    | 0.0593  | 0.09957      | 0.348        |
| 16   | 8      | 1       | 0.1628   | 0.0563  | 0.08265      | 0.321        |
| 17   | 7      | 1       | 0.1395   | 0.0528  | 0.06643      | 0.293        |
| 18   | 6      | 1       | 0.1163   | 0.0489  | 0.05101      | 0.265        |
| 19   | 5      | 1       | 0.093    | 0.0443  | 0.03658      | 0.237        |
| 29   | 4      | 1       | 0.0698   | 0.0388  | 0.02342      | 0.208        |
| 30   | 3      | 1       | 0.0465   | 0.0321  | 0.01202      | 0.18         |
| 31   | 2      | 1       | 0.0233   | 0.023   | 0.00335      | 0.161        |
| 32   | 1      | 1       | 0        | NaN     | NA           | NA           |

**Table S175.** Sarigol station Kaplan-Meier survival estimates according to SPEI-6

| Kaplan-Meier Wet to Dry (SPEI6) |        |         |          |         |              |              |
|---------------------------------|--------|---------|----------|---------|--------------|--------------|
|                                 |        | n       | events   | median  | 0.95LCL      | 0.95UCL      |
|                                 |        | 51      | 51       | 15      | 13           | 18           |
| time                            | n.risk | n.event | survival | std.err | lower 95% CI | upper 95% CI |
| 1                               | 51     | 3       | 0.9412   | 0.0329  | 0.87877      | 1.000        |
| 2                               | 48     | 3       | 0.8824   | 0.0451  | 0.79821      | 0.975        |
| 3                               | 45     | 1       | 0.8627   | 0.0482  | 0.77329      | 0.963        |
| 6                               | 44     | 2       | 0.8235   | 0.0534  | 0.72528      | 0.935        |
| 7                               | 42     | 1       | 0.8039   | 0.0556  | 0.70202      | 0.921        |
| 8                               | 41     | 1       | 0.7843   | 0.0576  | 0.67918      | 0.906        |
| 9                               | 40     | 1       | 0.7647   | 0.0594  | 0.65672      | 0.89         |
| 10                              | 39     | 1       | 0.7451   | 0.061   | 0.6346       | 0.875        |
| 11                              | 38     | 2       | 0.7059   | 0.0638  | 0.59128      | 0.843        |
| 12                              | 36     | 4       | 0.6275   | 0.0677  | 0.50785      | 0.775        |
| 13                              | 32     | 3       | 0.5686   | 0.0694  | 0.44773      | 0.722        |
| 14                              | 29     | 2       | 0.5294   | 0.0699  | 0.40871      | 0.686        |
| 15                              | 27     | 3       | 0.4706   | 0.0699  | 0.35174      | 0.63         |
| 16                              | 24     | 2       | 0.4314   | 0.0694  | 0.31478      | 0.591        |
| 17                              | 22     | 3       | 0.3725   | 0.0677  | 0.26092      | 0.532        |

|    |    |   |        |        |         |       |
|----|----|---|--------|--------|---------|-------|
| 18 | 19 | 2 | 0.3333 | 0.066  | 0.22611 | 0.491 |
| 19 | 17 | 2 | 0.2941 | 0.0638 | 0.19225 | 0.45  |
| 20 | 15 | 1 | 0.2745 | 0.0625 | 0.17571 | 0.429 |
| 21 | 14 | 1 | 0.2549 | 0.061  | 0.15944 | 0.408 |
| 22 | 13 | 1 | 0.2353 | 0.0594 | 0.14346 | 0.386 |
| 23 | 12 | 1 | 0.2157 | 0.0576 | 0.1278  | 0.364 |
| 24 | 11 | 1 | 0.1961 | 0.0556 | 0.11248 | 0.342 |
| 25 | 10 | 1 | 0.1765 | 0.0534 | 0.09754 | 0.319 |
| 26 | 9  | 1 | 0.1569 | 0.0509 | 0.08302 | 0.296 |
| 27 | 8  | 1 | 0.1373 | 0.0482 | 0.06898 | 0.273 |
| 28 | 7  | 1 | 0.1176 | 0.0451 | 0.05548 | 0.249 |
| 29 | 6  | 1 | 0.098  | 0.0416 | 0.04265 | 0.225 |
| 30 | 5  | 2 | 0.0588 | 0.0329 | 0.01962 | 0.176 |
| 31 | 3  | 1 | 0.0392 | 0.0272 | 0.01008 | 0.153 |
| 32 | 2  | 1 | 0.0196 | 0.0194 | 0.00282 | 0.137 |
| 54 | 1  | 1 | 0      | NaN    | NA      | NA    |

**Table S176.** Sarigol station Kaplan-Meier survival estimates according to SPEI-12

| Kaplan-Meier Wet to Dry (SPEI12) |        |         |          |         |              |              |
|----------------------------------|--------|---------|----------|---------|--------------|--------------|
|                                  |        | n       | events   | median  | 0.95LCL      | 0.95UCL      |
|                                  |        | 38      | 38       | 12.5    | 6            | 43           |
| time                             | n.risk | n.event | survival | std.err | lower 95% CI | upper 95% CI |
| 1                                | 38     | 1       | 0.9737   | 0.026   | 0.9241       | 1.000        |
| 2                                | 37     | 3       | 0.8947   | 0.0498  | 0.8023       | 0.998        |
| 3                                | 34     | 4       | 0.7895   | 0.0661  | 0.6699       | 0.93         |
| 4                                | 30     | 3       | 0.7105   | 0.0736  | 0.58         | 0.87         |
| 5                                | 27     | 2       | 0.6579   | 0.077   | 0.5231       | 0.827        |
| 6                                | 25     | 1       | 0.6316   | 0.0783  | 0.4954       | 0.805        |
| 7                                | 24     | 1       | 0.6053   | 0.0793  | 0.4682       | 0.782        |
| 8                                | 23     | 1       | 0.5789   | 0.0801  | 0.4414       | 0.759        |
| 9                                | 22     | 1       | 0.5526   | 0.0807  | 0.4151       | 0.736        |
| 11                               | 21     | 1       | 0.5263   | 0.081   | 0.3893       | 0.712        |
| 12                               | 20     | 1       | 0.5      | 0.0811  | 0.3638       | 0.687        |
| 13                               | 19     | 1       | 0.4737   | 0.081   | 0.3388       | 0.662        |
| 14                               | 18     | 1       | 0.4474   | 0.0807  | 0.3142       | 0.637        |
| 33                               | 17     | 1       | 0.4211   | 0.0801  | 0.29         | 0.611        |
| 39                               | 16     | 1       | 0.3947   | 0.0793  | 0.2663       | 0.585        |
| 40                               | 15     | 1       | 0.3684   | 0.0783  | 0.243        | 0.559        |
| 41                               | 14     | 1       | 0.3421   | 0.077   | 0.2201       | 0.532        |
| 42                               | 13     | 1       | 0.3158   | 0.0754  | 0.1978       | 0.504        |
| 43                               | 12     | 1       | 0.2895   | 0.0736  | 0.1759       | 0.476        |
| 44                               | 11     | 1       | 0.2632   | 0.0714  | 0.1546       | 0.448        |
| 45                               | 10     | 1       | 0.2368   | 0.069   | 0.1338       | 0.419        |

|    |   |   |        |        |        |       |
|----|---|---|--------|--------|--------|-------|
| 46 | 9 | 1 | 0.2105 | 0.0661 | 0.1137 | 0.39  |
| 47 | 8 | 2 | 0.1579 | 0.0592 | 0.0758 | 0.329 |
| 48 | 6 | 1 | 0.1316 | 0.0548 | 0.0581 | 0.298 |
| 49 | 5 | 1 | 0.1053 | 0.0498 | 0.0417 | 0.266 |
| 50 | 4 | 1 | 0.0789 | 0.0437 | 0.0266 | 0.234 |
| 51 | 3 | 1 | 0.0526 | 0.0362 | 0.0137 | 0.203 |
| 52 | 2 | 1 | 0.0263 | 0.026  | 0.0038 | 0.182 |
| 74 | 1 | 1 | 0      | NaN    | NA     | NA    |

**Table S177.** Sarigol station Kaplan-Meier drought risk estimates according to SPEI-3, 6, and 12

| Drought Risk (SPEI3) |              | Drought Risk (SPEI6) |              | Drought Risk (SPEI12) |              |
|----------------------|--------------|----------------------|--------------|-----------------------|--------------|
| Time                 | Drought Risk | Time                 | Drought Risk | Time                  | Drought Risk |
| 1                    | 0.0465       | 1                    | 0.0588       | 1                     | 0.0263       |
| 2                    | 0.0698       | 2                    | 0.1176       | 2                     | 0.1053       |
| 3                    | 0.1628       | 3                    | 0.1373       | 3                     | 0.2105       |
| 4                    | 0.2326       | 6                    | 0.1765       | 4                     | 0.2895       |
| 5                    | 0.3023       | 7                    | 0.1961       | 5                     | 0.3421       |
| 6                    | 0.3488       | 8                    | 0.2157       | 6                     | 0.3684       |
| 7                    | 0.4186       | 9                    | 0.2353       | 7                     | 0.3947       |
| 8                    | 0.4884       | 10                   | 0.2549       | 8                     | 0.4211       |
| 9                    | 0.6047       | 11                   | 0.2941       | 9                     | 0.4474       |
| 10                   | 0.6977       | 12                   | 0.3725       | 11                    | 0.4737       |
| 11                   | 0.7674       | 13                   | 0.4314       | 12                    | 0.5          |
| 12                   | 0.782933     | 14                   | 0.4706       | 13                    | 0.5263       |
| 14                   | 0.814        | 15                   | 0.5294       | 14                    | 0.5526       |
| 16                   | 0.8372       | 16                   | 0.5686       | 33                    | 0.5789       |
| 17                   | 0.8605       | 17                   | 0.6275       | 39                    | 0.6053       |
| 18                   | 0.8837       | 18                   | 0.6667       | 40                    | 0.6316       |
| 19                   | 0.907        | 19                   | 0.7059       | 41                    | 0.6579       |
| 29                   | 0.9302       | 20                   | 0.7255       | 42                    | 0.6842       |
| 30                   | 0.9535       | 21                   | 0.7451       | 43                    | 0.7105       |
| 31                   | 0.9767       | 22                   | 0.7647       | 44                    | 0.7368       |
| 32                   | 1            | 23                   | 0.7843       | 45                    | 0.7632       |
|                      |              | 24                   | 0.8039       | 46                    | 0.7895       |
|                      |              | 25                   | 0.8235       | 47                    | 0.8421       |
|                      |              | 26                   | 0.8431       | 48                    | 0.8684       |
|                      |              | 27                   | 0.8627       | 49                    | 0.8947       |
|                      |              | 28                   | 0.8824       | 50                    | 0.9211       |
|                      |              | 29                   | 0.902        | 51                    | 0.9474       |
|                      |              | 30                   | 0.9412       | 52                    | 0.9737       |
|                      |              | 31                   | 0.9608       | 74                    | 1            |
|                      |              | 32                   | 0.9804       |                       |              |
|                      |              | 54                   | 1            |                       |              |

**Table S178.** Saruhanli station Kaplan-Meier survival estimates according to SPI-3

| Kaplan-Meier Wet to Dry (SPI3) |        |         |          |         |              |              |
|--------------------------------|--------|---------|----------|---------|--------------|--------------|
|                                |        | n       | events   | median  | 0.95LCL      | 0.95UCL      |
|                                |        | 66      | 66       | 8       | 7            | 9            |
| time                           | n.risk | n.event | survival | std.err | lower 95% CL | upper 95% CL |
| 1                              | 66     | 2       | 0.9697   | 0.0211  | 0.92921      | 1            |
| 2                              | 64     | 2       | 0.9394   | 0.0294  | 0.88356      | 0.999        |
| 3                              | 62     | 10      | 0.7879   | 0.0503  | 0.69517      | 0.893        |
| 4                              | 52     | 3       | 0.7424   | 0.0538  | 0.64408      | 0.856        |
| 5                              | 49     | 4       | 0.6818   | 0.0573  | 0.57822      | 0.804        |
| 6                              | 45     | 3       | 0.6364   | 0.0592  | 0.53028      | 0.764        |
| 7                              | 42     | 8       | 0.5152   | 0.0615  | 0.40765      | 0.651        |
| 8                              | 34     | 4       | 0.4545   | 0.0613  | 0.34898      | 0.592        |
| 9                              | 30     | 7       | 0.3485   | 0.0587  | 0.25057      | 0.485        |
| 10                             | 23     | 4       | 0.2879   | 0.0557  | 0.19698      | 0.421        |
| 11                             | 19     | 2       | 0.2576   | 0.0538  | 0.17101      | 0.388        |
| 12                             | 17     | 2       | 0.2273   | 0.0516  | 0.14566      | 0.355        |
| 13                             | 15     | 4       | 0.1667   | 0.0459  | 0.09718      | 0.286        |
| 14                             | 11     | 3       | 0.1212   | 0.0402  | 0.0633       | 0.232        |
| 15                             | 8      | 1       | 0.1061   | 0.0379  | 0.05265      | 0.214        |
| 16                             | 7      | 1       | 0.0909   | 0.0354  | 0.04239      | 0.195        |
| 17                             | 6      | 1       | 0.0758   | 0.0326  | 0.03262      | 0.176        |
| 18                             | 5      | 3       | 0.0303   | 0.0211  | 0.00774      | 0.119        |
| 19                             | 2      | 1       | 0.0152   | 0.015   | 0.00217      | 0.106        |
| 20                             | 1      | 1       | 0        | NaN     | NA           | NA           |

**Table S179.** Saruhanli station Kaplan-Meier survival estimates according to SPI-6

| Kaplan-Meier Wet to Dry (SPI6) |        |         |          |         |              |              |
|--------------------------------|--------|---------|----------|---------|--------------|--------------|
|                                |        | n       | events   | median  | 0.95LCL      | 0.95UCL      |
|                                |        | 59      | 59       | 9       | 6            | 12           |
| time                           | n.risk | n.event | survival | std.err | lower 95% CL | upper 95% CL |
| 1                              | 59     | 5       | 0.9153   | 0.0363  | 0.84688      | 0.989        |
| 2                              | 54     | 6       | 0.8136   | 0.0507  | 0.72001      | 0.919        |
| 3                              | 48     | 4       | 0.7458   | 0.0567  | 0.64254      | 0.866        |
| 4                              | 44     | 3       | 0.6949   | 0.0599  | 0.58682      | 0.823        |
| 5                              | 41     | 2       | 0.661    | 0.0616  | 0.55062      | 0.794        |
| 6                              | 39     | 3       | 0.6102   | 0.0635  | 0.49759      | 0.748        |
| 7                              | 36     | 3       | 0.5593   | 0.0646  | 0.44596      | 0.701        |
| 8                              | 33     | 3       | 0.5085   | 0.0651  | 0.39565      | 0.653        |
| 9                              | 30     | 2       | 0.4746   | 0.065   | 0.36283      | 0.621        |
| 10                             | 28     | 3       | 0.4237   | 0.0643  | 0.31467      | 0.571        |

|    |    |   |        |        |         |       |
|----|----|---|--------|--------|---------|-------|
| 11 | 25 | 4 | 0.3559 | 0.0623 | 0.25252 | 0.502 |
| 12 | 21 | 1 | 0.339  | 0.0616 | 0.23737 | 0.484 |
| 13 | 20 | 1 | 0.322  | 0.0608 | 0.22239 | 0.466 |
| 14 | 19 | 1 | 0.3051 | 0.0599 | 0.20757 | 0.448 |
| 15 | 18 | 2 | 0.2712 | 0.0579 | 0.17848 | 0.412 |
| 16 | 16 | 1 | 0.2542 | 0.0567 | 0.16423 | 0.394 |
| 18 | 15 | 2 | 0.2203 | 0.054  | 0.13634 | 0.356 |
| 19 | 13 | 2 | 0.1864 | 0.0507 | 0.10941 | 0.318 |
| 20 | 11 | 1 | 0.1695 | 0.0488 | 0.09635 | 0.298 |
| 21 | 10 | 1 | 0.1525 | 0.0468 | 0.0836  | 0.278 |
| 23 | 9  | 1 | 0.1356 | 0.0446 | 0.07119 | 0.258 |
| 28 | 8  | 1 | 0.1186 | 0.0421 | 0.05918 | 0.238 |
| 36 | 7  | 1 | 0.1017 | 0.0393 | 0.04764 | 0.217 |
| 37 | 6  | 1 | 0.0847 | 0.0363 | 0.03664 | 0.196 |
| 38 | 5  | 1 | 0.0678 | 0.0327 | 0.02632 | 0.175 |
| 39 | 4  | 1 | 0.0508 | 0.0286 | 0.01688 | 0.153 |
| 40 | 3  | 1 | 0.0339 | 0.0236 | 0.00868 | 0.132 |
| 41 | 2  | 1 | 0.0169 | 0.0168 | 0.00243 | 0.118 |
| 42 | 1  | 1 | 0      | NaN    | NA      | NA    |

**Table S180.** Saruhanli station Kaplan-Meier survival estimates according to SPI-12

| Kaplan-Meier Wet to Dry (SPI12) |        |         |          |         |              |              |
|---------------------------------|--------|---------|----------|---------|--------------|--------------|
|                                 |        | n       | events   | median  | 0.95LCL      | 0.95UCL      |
|                                 |        | 64      | 64       | 22.5    | 21           | 34           |
| time                            | n.risk | n.event | survival | std.err | lower 95% CL | upper 95% CL |
| 1                               | 64     | 3       | 0.9531   | 0.0264  | 0.90272      | 1            |
| 2                               | 61     | 5       | 0.875    | 0.0413  | 0.79761      | 0.96         |
| 3                               | 56     | 3       | 0.8281   | 0.0472  | 0.74067      | 0.926        |
| 4                               | 53     | 3       | 0.7812   | 0.0517  | 0.68626      | 0.889        |
| 5                               | 50     | 3       | 0.7344   | 0.0552  | 0.63376      | 0.851        |
| 6                               | 47     | 1       | 0.7188   | 0.0562  | 0.61662      | 0.838        |
| 7                               | 46     | 1       | 0.7031   | 0.0571  | 0.59965      | 0.824        |
| 17                              | 45     | 1       | 0.6875   | 0.0579  | 0.58282      | 0.811        |
| 18                              | 44     | 1       | 0.6719   | 0.0587  | 0.56615      | 0.797        |
| 19                              | 43     | 1       | 0.6562   | 0.0594  | 0.54962      | 0.784        |
| 20                              | 42     | 3       | 0.6094   | 0.061   | 0.50084      | 0.741        |
| 21                              | 39     | 4       | 0.5469   | 0.0622  | 0.43756      | 0.684        |
| 22                              | 35     | 3       | 0.5      | 0.0625  | 0.39135      | 0.639        |
| 23                              | 32     | 1       | 0.4844   | 0.0625  | 0.37619      | 0.624        |
| 24                              | 31     | 1       | 0.4688   | 0.0624  | 0.36114      | 0.608        |
| 25                              | 30     | 1       | 0.4531   | 0.0622  | 0.3462       | 0.593        |
| 27                              | 29     | 1       | 0.4375   | 0.062   | 0.33138      | 0.578        |
| 28                              | 28     | 1       | 0.4219   | 0.0617  | 0.31669      | 0.562        |



|    |    |   |        |        |         |       |
|----|----|---|--------|--------|---------|-------|
| 31 | 27 | 1 | 0.4062 | 0.0614 | 0.30211 | 0.546 |
| 32 | 26 | 1 | 0.3906 | 0.061  | 0.28765 | 0.53  |
| 33 | 25 | 1 | 0.375  | 0.0605 | 0.27332 | 0.515 |
| 34 | 24 | 1 | 0.3594 | 0.06   | 0.25911 | 0.498 |
| 35 | 23 | 1 | 0.3438 | 0.0594 | 0.24504 | 0.482 |
| 36 | 22 | 2 | 0.3125 | 0.0579 | 0.21729 | 0.449 |
| 37 | 20 | 2 | 0.2812 | 0.0562 | 0.19011 | 0.416 |
| 38 | 18 | 2 | 0.25   | 0.0541 | 0.16355 | 0.382 |
| 39 | 16 | 1 | 0.2344 | 0.053  | 0.15052 | 0.365 |
| 40 | 15 | 1 | 0.2188 | 0.0517 | 0.13768 | 0.348 |
| 41 | 14 | 1 | 0.2031 | 0.0503 | 0.12503 | 0.33  |
| 42 | 13 | 1 | 0.1875 | 0.0488 | 0.11259 | 0.312 |
| 43 | 12 | 1 | 0.1719 | 0.0472 | 0.10038 | 0.294 |
| 44 | 11 | 1 | 0.1562 | 0.0454 | 0.08842 | 0.276 |
| 45 | 10 | 1 | 0.1406 | 0.0435 | 0.07674 | 0.258 |
| 46 | 9  | 1 | 0.125  | 0.0413 | 0.06537 | 0.239 |
| 60 | 8  | 1 | 0.1094 | 0.039  | 0.05436 | 0.22  |
| 61 | 7  | 1 | 0.0938 | 0.0364 | 0.04377 | 0.201 |
| 62 | 6  | 1 | 0.0781 | 0.0335 | 0.03367 | 0.181 |
| 63 | 5  | 1 | 0.0625 | 0.0303 | 0.0242  | 0.161 |
| 64 | 4  | 1 | 0.0469 | 0.0264 | 0.01553 | 0.141 |
| 65 | 3  | 1 | 0.0312 | 0.0217 | 0.00799 | 0.122 |
| 66 | 2  | 1 | 0.0156 | 0.0155 | 0.00224 | 0.109 |
| 67 | 1  | 1 | 0      | NaN    | NA      | NA    |

**Table S181.** Saruhanli station Kaplan-Meier drought risk estimates according to SPI-3, 6, and 12

| Drought Risk (SPI3) |              | Drought Risk (SPI6) |              | Drought Risk (SPI12) |              |
|---------------------|--------------|---------------------|--------------|----------------------|--------------|
| Time                | Drought Risk | Time                | Drought Risk | Time                 | Drought Risk |
| 1                   | 0.0303       | 1                   | 0.0847       | 1                    | 0.0469       |
| 2                   | 0.0606       | 2                   | 0.1864       | 2                    | 0.125        |
| 3                   | 0.2121       | 3                   | 0.2542       | 3                    | 0.1719       |
| 4                   | 0.2576       | 4                   | 0.3051       | 4                    | 0.2188       |
| 5                   | 0.3182       | 5                   | 0.339        | 5                    | 0.2656       |
| 6                   | 0.3636       | 6                   | 0.3898       | 6                    | 0.2812       |
| 7                   | 0.4848       | 7                   | 0.4407       | 7                    | 0.2969       |
| 8                   | 0.5455       | 8                   | 0.4915       | 12                   | 0.3047       |
| 9                   | 0.6515       | 9                   | 0.5254       | 17                   | 0.3125       |
| 10                  | 0.7121       | 10                  | 0.5763       | 18                   | 0.3281       |
| 11                  | 0.7424       | 11                  | 0.6441       | 19                   | 0.3438       |
| 12                  | 0.7727       | 12                  | 0.661        | 20                   | 0.3906       |
| 13                  | 0.8333       | 13                  | 0.678        | 21                   | 0.4531       |
| 14                  | 0.8788       | 14                  | 0.6949       | 22                   | 0.5          |
| 15                  | 0.8939       | 15                  | 0.7288       | 23                   | 0.5156       |
| 16                  | 0.9091       | 16                  | 0.7458       | 24                   | 0.5312       |

|    |        |    |        |    |        |
|----|--------|----|--------|----|--------|
| 17 | 0.9242 | 18 | 0.7797 | 25 | 0.5469 |
| 18 | 0.9697 | 19 | 0.8136 | 27 | 0.5625 |
| 19 | 0.9848 | 20 | 0.8305 | 28 | 0.5781 |
| 20 | 1      | 21 | 0.8475 | 31 | 0.5938 |
|    |        | 23 | 0.8644 | 32 | 0.6094 |
|    |        | 28 | 0.8814 | 33 | 0.625  |
|    |        | 36 | 0.8983 | 34 | 0.6406 |
|    |        | 37 | 0.9153 | 35 | 0.6562 |
|    |        | 38 | 0.9322 | 36 | 0.6875 |
|    |        | 39 | 0.9492 | 37 | 0.7188 |
|    |        | 40 | 0.9661 | 38 | 0.75   |
|    |        | 41 | 0.9831 | 39 | 0.7656 |
|    |        | 42 | 1      | 40 | 0.7812 |
|    |        |    |        | 41 | 0.7969 |
|    |        |    |        | 42 | 0.8125 |
|    |        |    |        | 43 | 0.8281 |
|    |        |    |        | 44 | 0.8438 |
|    |        |    |        | 45 | 0.8594 |
|    |        |    |        | 46 | 0.875  |
|    |        |    |        | 60 | 0.8906 |
|    |        |    |        | 61 | 0.9062 |
|    |        |    |        | 62 | 0.9219 |
|    |        |    |        | 63 | 0.9375 |
|    |        |    |        | 64 | 0.9531 |
|    |        |    |        | 65 | 0.9688 |
|    |        |    |        | 66 | 0.9844 |
|    |        |    |        | 67 | 1      |

**Table S182.** Saruhanli station Kaplan-Meier survival estimates according to SPEI-3

| Kaplan-Meier Wet to Dry (SPEI3) |        |         |          |         |              |              |
|---------------------------------|--------|---------|----------|---------|--------------|--------------|
|                                 |        | n       | events   | median  | 0.95LCL      | 0.95UCL      |
|                                 |        | 80      | 80       | 8       | 7            | 9            |
| time                            | n.risk | n.event | survival | std.err | lower 95% CI | upper 95% CI |
| 1                               | 80     | 4       | 0.95     | 0.0244  | 0.90342      | 0.999        |
| 2                               | 76     | 3       | 0.9125   | 0.0316  | 0.85264      | 0.9766       |
| 3                               | 73     | 10      | 0.7875   | 0.0457  | 0.70277      | 0.8824       |
| 4                               | 63     | 7       | 0.7      | 0.0512  | 0.60645      | 0.808        |
| 5                               | 56     | 3       | 0.6625   | 0.0529  | 0.56658      | 0.7747       |
| 6                               | 53     | 5       | 0.6      | 0.0548  | 0.5017       | 0.7176       |
| 7                               | 48     | 6       | 0.525    | 0.0558  | 0.42622      | 0.6467       |
| 8                               | 42     | 7       | 0.4375   | 0.0555  | 0.34125      | 0.5609       |
| 9                               | 35     | 7       | 0.35     | 0.0533  | 0.25964      | 0.4718       |
| 10                              | 28     | 6       | 0.275    | 0.0499  | 0.19267      | 0.3925       |

|    |    |   |        |        |         |        |
|----|----|---|--------|--------|---------|--------|
| 11 | 22 | 3 | 0.2375 | 0.0476 | 0.16038 | 0.3517 |
| 12 | 19 | 1 | 0.225  | 0.0467 | 0.14982 | 0.3379 |
| 13 | 18 | 1 | 0.2125 | 0.0457 | 0.13937 | 0.324  |
| 14 | 17 | 5 | 0.15   | 0.0399 | 0.08903 | 0.2527 |
| 15 | 12 | 4 | 0.1    | 0.0335 | 0.05182 | 0.193  |
| 16 | 8  | 3 | 0.0625 | 0.0271 | 0.02675 | 0.146  |
| 17 | 5  | 1 | 0.05   | 0.0244 | 0.01924 | 0.13   |
| 18 | 4  | 1 | 0.0375 | 0.0212 | 0.01236 | 0.1138 |
| 25 | 3  | 1 | 0.025  | 0.0175 | 0.00636 | 0.0982 |
| 26 | 2  | 1 | 0.0125 | 0.0124 | 0.00178 | 0.0877 |
| 27 | 1  | 1 | 0      | NaN    | NA      | NA     |

**Table S183.** Saruhanli station Kaplan-Meier survival estimates according to SPEI-6

| Kaplan-Meier Wet to Dry (SPEI6) |        |         |          |         |              |              |
|---------------------------------|--------|---------|----------|---------|--------------|--------------|
|                                 |        | n       | events   | median  | 0.95LCL      | 0.95UCL      |
|                                 |        | 73      | 73       | 11      | 9            | 15           |
| time                            | n.risk | n.event | survival | std.err | lower 95% CI | upper 95% CI |
| 1                               | 73     | 5       | 0.9315   | 0.0296  | 0.87533      | 0.9913       |
| 2                               | 68     | 5       | 0.863    | 0.0402  | 0.78764      | 0.9456       |
| 3                               | 63     | 5       | 0.7945   | 0.0473  | 0.70703      | 0.8928       |
| 4                               | 58     | 5       | 0.726    | 0.0522  | 0.6306       | 0.8359       |
| 5                               | 53     | 3       | 0.6849   | 0.0544  | 0.58624      | 0.8002       |
| 6                               | 50     | 3       | 0.6438   | 0.056   | 0.54285      | 0.7636       |
| 7                               | 47     | 2       | 0.6164   | 0.0569  | 0.5144       | 0.7387       |
| 8                               | 45     | 1       | 0.6027   | 0.0573  | 0.50032      | 0.7261       |
| 9                               | 44     | 3       | 0.5616   | 0.0581  | 0.45861      | 0.6878       |
| 10                              | 41     | 4       | 0.5068   | 0.0585  | 0.40421      | 0.6355       |
| 11                              | 37     | 3       | 0.4658   | 0.0584  | 0.3643       | 0.5955       |
| 12                              | 34     | 2       | 0.4384   | 0.0581  | 0.33811      | 0.5683       |
| 13                              | 32     | 2       | 0.411    | 0.0576  | 0.31227      | 0.5408       |
| 14                              | 30     | 2       | 0.3836   | 0.0569  | 0.28677      | 0.513        |
| 15                              | 28     | 1       | 0.3699   | 0.0565  | 0.27416      | 0.499        |
| 16                              | 27     | 2       | 0.3425   | 0.0555  | 0.24921      | 0.4706       |
| 17                              | 25     | 3       | 0.3014   | 0.0537  | 0.21253      | 0.4274       |
| 18                              | 22     | 4       | 0.2466   | 0.0504  | 0.16512      | 0.3682       |
| 19                              | 18     | 3       | 0.2055   | 0.0473  | 0.13088      | 0.3226       |
| 20                              | 15     | 2       | 0.1781   | 0.0448  | 0.10879      | 0.2915       |
| 21                              | 13     | 1       | 0.1644   | 0.0434  | 0.098        | 0.2757       |
| 22                              | 12     | 1       | 0.1507   | 0.0419  | 0.08741      | 0.2598       |
| 23                              | 11     | 1       | 0.137    | 0.0402  | 0.07702      | 0.2436       |
| 24                              | 10     | 1       | 0.1233   | 0.0385  | 0.06687      | 0.2273       |
| 28                              | 9      | 1       | 0.1096   | 0.0366  | 0.05699      | 0.2107       |
| 38                              | 8      | 1       | 0.0959   | 0.0345  | 0.04741      | 0.1939       |

|     |   |   |        |        |         |        |
|-----|---|---|--------|--------|---------|--------|
| 39  | 7 | 1 | 0.0822 | 0.0321 | 0.03819 | 0.1769 |
| 40  | 6 | 1 | 0.0685 | 0.0296 | 0.02939 | 0.1596 |
| 41  | 5 | 1 | 0.0548 | 0.0266 | 0.02113 | 0.1421 |
| 42  | 4 | 1 | 0.0411 | 0.0232 | 0.01357 | 0.1245 |
| 43  | 3 | 1 | 0.0274 | 0.0191 | 0.00698 | 0.1075 |
| 44  | 2 | 1 | 0.0137 | 0.0136 | 0.00196 | 0.0959 |
| 107 | 1 | 1 | 0      | NaN    | NA      | NA     |

**Table S184.** Saruhanli station Kaplan-Meier survival estimates according to SPEI-12

| Kaplan-Meier Wet to Dry (SPEI12) |        |         |          |         |              |              |
|----------------------------------|--------|---------|----------|---------|--------------|--------------|
|                                  |        | n       | events   | median  | 0.95LCL      | 0.95UCL      |
|                                  |        | 80      | 80       | 15.5    | 14           | 17           |
| time                             | n.risk | n.event | survival | std.err | lower 95% CI | upper 95% CI |
| 1                                | 80     | 4       | 0.95     | 0.0244  | 0.90342      | 0.999        |
| 2                                | 76     | 4       | 0.9      | 0.0335  | 0.8366       | 0.9682       |
| 3                                | 72     | 3       | 0.8625   | 0.0385  | 0.79024      | 0.9414       |
| 4                                | 69     | 3       | 0.825    | 0.0425  | 0.7458       | 0.9126       |
| 5                                | 66     | 3       | 0.7875   | 0.0457  | 0.70277      | 0.8824       |
| 6                                | 63     | 2       | 0.7625   | 0.0476  | 0.67473      | 0.8617       |
| 7                                | 61     | 2       | 0.7375   | 0.0492  | 0.64712      | 0.8405       |
| 8                                | 59     | 2       | 0.7125   | 0.0506  | 0.61992      | 0.8189       |
| 9                                | 57     | 1       | 0.7      | 0.0512  | 0.60645      | 0.808        |
| 12                               | 56     | 2       | 0.675    | 0.0524  | 0.57979      | 0.7858       |
| 13                               | 54     | 2       | 0.65     | 0.0533  | 0.55345      | 0.7634       |
| 14                               | 52     | 5       | 0.5875   | 0.055   | 0.48895      | 0.7059       |
| 15                               | 47     | 7       | 0.5      | 0.0559  | 0.40161      | 0.6225       |
| 16                               | 40     | 5       | 0.4375   | 0.0555  | 0.34125      | 0.5609       |
| 17                               | 35     | 5       | 0.375    | 0.0541  | 0.2826       | 0.4976       |
| 18                               | 30     | 5       | 0.3125   | 0.0518  | 0.22578      | 0.4325       |
| 19                               | 25     | 4       | 0.2625   | 0.0492  | 0.18181      | 0.379        |
| 20                               | 21     | 3       | 0.225    | 0.0467  | 0.14982      | 0.3379       |
| 21                               | 18     | 3       | 0.1875   | 0.0436  | 0.11882      | 0.2959       |
| 22                               | 15     | 1       | 0.175    | 0.0425  | 0.10874      | 0.2816       |
| 27                               | 14     | 1       | 0.1625   | 0.0412  | 0.09881      | 0.2672       |
| 38                               | 13     | 1       | 0.15     | 0.0399  | 0.08903      | 0.2527       |
| 59                               | 12     | 2       | 0.125    | 0.037   | 0.07         | 0.2232       |
| 60                               | 10     | 1       | 0.1125   | 0.0353  | 0.06079      | 0.2082       |
| 61                               | 9      | 1       | 0.1      | 0.0335  | 0.05182      | 0.193        |
| 62                               | 8      | 1       | 0.0875   | 0.0316  | 0.04312      | 0.1776       |
| 63                               | 7      | 1       | 0.075    | 0.0294  | 0.03474      | 0.1619       |
| 64                               | 6      | 1       | 0.0625   | 0.0271  | 0.02675      | 0.146        |
| 65                               | 5      | 1       | 0.05     | 0.0244  | 0.01924      | 0.13         |
| 66                               | 4      | 1       | 0.0375   | 0.0212  | 0.01236      | 0.1138       |

|    |   |   |        |        |         |        |
|----|---|---|--------|--------|---------|--------|
| 67 | 3 | 1 | 0.025  | 0.0175 | 0.00636 | 0.0982 |
| 68 | 2 | 1 | 0.0125 | 0.0124 | 0.00178 | 0.0877 |
| 69 | 1 | 1 | 0      | NaN    | NA      | NA     |

**Table S185.** Saruhanli station Kaplan-Meier drought risk estimates according to SPEI-3, 6, and 12

| Drought Risk (SPEI3) |              | Drought Risk (SPEI6) |              | Drought Risk (SPEI12) |              |
|----------------------|--------------|----------------------|--------------|-----------------------|--------------|
| Time                 | Drought Risk | Time                 | Drought Risk | Time                  | Drought Risk |
| 1                    | 0.05         | 1                    | 0.0685       | 1                     | 0.05         |
| 2                    | 0.0875       | 2                    | 0.137        | 2                     | 0.1          |
| 3                    | 0.2125       | 3                    | 0.2055       | 3                     | 0.1375       |
| 4                    | 0.3          | 4                    | 0.274        | 4                     | 0.175        |
| 5                    | 0.3375       | 5                    | 0.3151       | 5                     | 0.2125       |
| 6                    | 0.4          | 6                    | 0.3562       | 6                     | 0.2375       |
| 7                    | 0.475        | 7                    | 0.3836       | 7                     | 0.2625       |
| 8                    | 0.5625       | 8                    | 0.3973       | 8                     | 0.2875       |
| 9                    | 0.65         | 9                    | 0.4384       | 9                     | 0.3          |
| 10                   | 0.725        | 10                   | 0.4932       | 12                    | 0.325        |
| 11                   | 0.7625       | 11                   | 0.5342       | 13                    | 0.35         |
| 12                   | 0.775        | 12                   | 0.5616       | 14                    | 0.4125       |
| 13                   | 0.7875       | 13                   | 0.589        | 15                    | 0.5          |
| 14                   | 0.85         | 14                   | 0.6164       | 16                    | 0.5625       |
| 15                   | 0.9          | 15                   | 0.6301       | 17                    | 0.625        |
| 16                   | 0.9375       | 16                   | 0.6575       | 18                    | 0.6875       |
| 17                   | 0.95         | 17                   | 0.6986       | 19                    | 0.7375       |
| 18                   | 0.9625       | 18                   | 0.7534       | 20                    | 0.775        |
| 25                   | 0.975        | 19                   | 0.7945       | 21                    | 0.8125       |
| 26                   | 0.9875       | 20                   | 0.8219       | 22                    | 0.825        |
| 27                   | 1            | 21                   | 0.8356       | 27                    | 0.8375       |
|                      |              | 22                   | 0.8493       | 38                    | 0.85         |
|                      |              | 23                   | 0.863        | 59                    | 0.875        |
|                      |              | 24                   | 0.8767       | 60                    | 0.8875       |
|                      |              | 28                   | 0.8904       | 61                    | 0.9          |
|                      |              | 38                   | 0.9041       | 62                    | 0.9125       |
|                      |              | 39                   | 0.9178       | 63                    | 0.925        |
|                      |              | 40                   | 0.9315       | 64                    | 0.9375       |
|                      |              | 41                   | 0.9452       | 65                    | 0.95         |
|                      |              | 42                   | 0.9589       | 66                    | 0.9625       |
|                      |              | 43                   | 0.9726       | 67                    | 0.975        |
|                      |              | 44                   | 0.9863       | 68                    | 0.9875       |
|                      |              | 107                  | 1            | 69                    | 1            |

**Table S186.** Selendi station Kaplan-Meier survival estimates according to SPI-3

| Kaplan-Meier Wet to Dry (SPI3) |        |         |          |         |              |              |
|--------------------------------|--------|---------|----------|---------|--------------|--------------|
|                                |        | n       | events   | median  | 0.95LCL      | 0.95UCL      |
|                                |        | 78      | 78       | 7       | 6            | 9            |
| time                           | n.risk | n.event | survival | std.err | lower 95% CL | upper 95% CL |
| 0                              | 78     | 1       | 0.9872   | 0.0127  | 0.96253      | 1            |
| 1                              | 77     | 7       | 0.8974   | 0.0344  | 0.83257      | 0.9674       |
| 2                              | 70     | 3       | 0.859    | 0.0394  | 0.78511      | 0.9398       |
| 3                              | 67     | 4       | 0.8077   | 0.0446  | 0.7248       | 0.9001       |
| 4                              | 63     | 6       | 0.7308   | 0.0502  | 0.63868      | 0.8361       |
| 5                              | 57     | 7       | 0.641    | 0.0543  | 0.54294      | 0.7568       |
| 6                              | 50     | 4       | 0.5897   | 0.0557  | 0.49009      | 0.7097       |
| 7                              | 46     | 8       | 0.4872   | 0.0566  | 0.38798      | 0.6117       |
| 8                              | 38     | 5       | 0.4231   | 0.0559  | 0.32649      | 0.5482       |
| 9                              | 33     | 5       | 0.359    | 0.0543  | 0.26685      | 0.4829       |
| 10                             | 28     | 5       | 0.2949   | 0.0516  | 0.20922      | 0.4156       |
| 11                             | 23     | 4       | 0.2436   | 0.0486  | 0.16475      | 0.3602       |
| 12                             | 19     | 4       | 0.1923   | 0.0446  | 0.12203      | 0.3031       |
| 13                             | 15     | 2       | 0.1667   | 0.0422  | 0.10147      | 0.2738       |
| 15                             | 13     | 1       | 0.1538   | 0.0409  | 0.09142      | 0.2589       |
| 16                             | 12     | 1       | 0.141    | 0.0394  | 0.08155      | 0.2439       |
| 17                             | 11     | 3       | 0.1026   | 0.0344  | 0.0532       | 0.1977       |
| 24                             | 8      | 1       | 0.0897   | 0.0324  | 0.04426      | 0.1819       |
| 25                             | 7      | 1       | 0.0769   | 0.0302  | 0.03566      | 0.1659       |
| 29                             | 6      | 1       | 0.0641   | 0.0277  | 0.02745      | 0.1497       |
| 30                             | 5      | 1       | 0.0513   | 0.025   | 0.01974      | 0.1332       |
| 31                             | 4      | 1       | 0.0385   | 0.0218  | 0.01268      | 0.1167       |
| 32                             | 3      | 1       | 0.0256   | 0.0179  | 0.00653      | 0.1007       |
| 49                             | 2      | 1       | 0.0128   | 0.0127  | 0.00183      | 0.0899       |
| 50                             | 1      | 1       | 0        | NaN     | NA           | NA           |

**Table S187.** Selendi station Kaplan-Meier survival estimates according to SPI-6

| Kaplan-Meier Wet to Dry (SPI6) |        |         |          |         |              |              |
|--------------------------------|--------|---------|----------|---------|--------------|--------------|
|                                |        | n       | events   | median  | 0.95LCL      | 0.95UCL      |
|                                |        | 66      | 66       | 10      | 8            | 13           |
| time                           | n.risk | n.event | survival | std.err | lower 95% CL | upper 95% CL |
| 0                              | 66     | 1       | 0.9848   | 0.015   | 0.95581      | 1            |
| 1                              | 65     | 2       | 0.9545   | 0.0256  | 0.90559      | 1            |
| 2                              | 63     | 3       | 0.9091   | 0.0354  | 0.84231      | 0.981        |
| 3                              | 60     | 4       | 0.8485   | 0.0441  | 0.76625      | 0.94         |
| 4                              | 56     | 1       | 0.8333   | 0.0459  | 0.7481       | 0.928        |
| 5                              | 55     | 1       | 0.8182   | 0.0475  | 0.73023      | 0.917        |
| 6                              | 54     | 3       | 0.7727   | 0.0516  | 0.67796      | 0.881        |

|    |    |   |        |        |         |       |
|----|----|---|--------|--------|---------|-------|
| 7  | 51 | 7 | 0.6667 | 0.058  | 0.56211 | 0.791 |
| 8  | 44 | 6 | 0.5758 | 0.0608 | 0.46806 | 0.708 |
| 9  | 38 | 3 | 0.5303 | 0.0614 | 0.42259 | 0.665 |
| 10 | 35 | 4 | 0.4697 | 0.0614 | 0.36349 | 0.607 |
| 11 | 31 | 4 | 0.4091 | 0.0605 | 0.30612 | 0.547 |
| 12 | 27 | 2 | 0.3788 | 0.0597 | 0.27811 | 0.516 |
| 13 | 25 | 3 | 0.3333 | 0.058  | 0.23698 | 0.469 |
| 14 | 22 | 2 | 0.303  | 0.0566 | 0.21018 | 0.437 |
| 15 | 20 | 2 | 0.2727 | 0.0548 | 0.18392 | 0.404 |
| 16 | 18 | 2 | 0.2424 | 0.0528 | 0.15825 | 0.371 |
| 17 | 16 | 2 | 0.2121 | 0.0503 | 0.13325 | 0.338 |
| 18 | 14 | 3 | 0.1667 | 0.0459 | 0.09718 | 0.286 |
| 19 | 11 | 2 | 0.1364 | 0.0422 | 0.07431 | 0.25  |
| 20 | 9  | 1 | 0.1212 | 0.0402 | 0.0633  | 0.232 |
| 24 | 8  | 1 | 0.1061 | 0.0379 | 0.05265 | 0.214 |
| 25 | 7  | 1 | 0.0909 | 0.0354 | 0.04239 | 0.195 |
| 26 | 6  | 1 | 0.0758 | 0.0326 | 0.03262 | 0.176 |
| 77 | 5  | 1 | 0.0606 | 0.0294 | 0.02344 | 0.157 |
| 78 | 4  | 1 | 0.0455 | 0.0256 | 0.01505 | 0.137 |
| 79 | 3  | 1 | 0.0303 | 0.0211 | 0.00774 | 0.119 |
| 86 | 2  | 1 | 0.0152 | 0.015  | 0.00217 | 0.106 |
| 87 | 1  | 1 | 0      | NaN    | NA      | NA    |

**Table S188.** Selendi station Kaplan-Meier survival estimates according to SPI-12

| Kaplan-Meier Wet to Dry (SPI12) |        |         |          |         |              |              |
|---------------------------------|--------|---------|----------|---------|--------------|--------------|
|                                 |        | n       | events   | median  | 0.95LCL      | 0.95UCL      |
|                                 |        | 64      | 64       | 15      | 12           | 18           |
| time                            | n.risk | n.event | survival | std.err | lower 95% CL | upper 95% CL |
| 1                               | 64     | 2       | 0.9688   | 0.0217  | 0.92705      | 1            |
| 2                               | 62     | 1       | 0.9531   | 0.0264  | 0.90272      | 1            |
| 3                               | 61     | 2       | 0.9219   | 0.0335  | 0.85842      | 0.99         |
| 4                               | 59     | 3       | 0.875    | 0.0413  | 0.79761      | 0.96         |
| 5                               | 56     | 3       | 0.8281   | 0.0472  | 0.74067      | 0.926        |
| 6                               | 53     | 3       | 0.7812   | 0.0517  | 0.68626      | 0.889        |
| 7                               | 50     | 2       | 0.75     | 0.0541  | 0.65108      | 0.864        |
| 8                               | 48     | 2       | 0.7188   | 0.0562  | 0.61662      | 0.838        |
| 9                               | 46     | 2       | 0.6875   | 0.0579  | 0.58282      | 0.811        |
| 10                              | 44     | 2       | 0.6562   | 0.0594  | 0.54962      | 0.784        |
| 11                              | 42     | 3       | 0.6094   | 0.061   | 0.50084      | 0.741        |
| 12                              | 39     | 2       | 0.5781   | 0.0617  | 0.46895      | 0.713        |
| 13                              | 37     | 2       | 0.5469   | 0.0622  | 0.43756      | 0.684        |
| 14                              | 35     | 2       | 0.5156   | 0.0625  | 0.40664      | 0.654        |
| 15                              | 33     | 2       | 0.4844   | 0.0625  | 0.37619      | 0.624        |

|     |    |   |        |        |         |       |
|-----|----|---|--------|--------|---------|-------|
| 16  | 31 | 3 | 0.4375 | 0.062  | 0.33138 | 0.578 |
| 17  | 28 | 3 | 0.3906 | 0.061  | 0.28765 | 0.53  |
| 18  | 25 | 2 | 0.3594 | 0.06   | 0.25911 | 0.498 |
| 19  | 23 | 2 | 0.3281 | 0.0587 | 0.23109 | 0.466 |
| 20  | 21 | 2 | 0.2969 | 0.0571 | 0.20362 | 0.433 |
| 21  | 19 | 2 | 0.2656 | 0.0552 | 0.17675 | 0.399 |
| 22  | 17 | 1 | 0.25   | 0.0541 | 0.16355 | 0.382 |
| 23  | 16 | 1 | 0.2344 | 0.053  | 0.15052 | 0.365 |
| 24  | 15 | 1 | 0.2188 | 0.0517 | 0.13768 | 0.348 |
| 25  | 14 | 1 | 0.2031 | 0.0503 | 0.12503 | 0.33  |
| 26  | 13 | 1 | 0.1875 | 0.0488 | 0.11259 | 0.312 |
| 27  | 12 | 1 | 0.1719 | 0.0472 | 0.10038 | 0.294 |
| 28  | 11 | 1 | 0.1562 | 0.0454 | 0.08842 | 0.276 |
| 29  | 10 | 2 | 0.125  | 0.0413 | 0.06537 | 0.239 |
| 30  | 8  | 1 | 0.1094 | 0.039  | 0.05436 | 0.22  |
| 31  | 7  | 1 | 0.0938 | 0.0364 | 0.04377 | 0.201 |
| 32  | 6  | 1 | 0.0781 | 0.0335 | 0.03367 | 0.181 |
| 50  | 5  | 1 | 0.0625 | 0.0303 | 0.0242  | 0.161 |
| 51  | 4  | 1 | 0.0469 | 0.0264 | 0.01553 | 0.141 |
| 91  | 3  | 1 | 0.0312 | 0.0217 | 0.00799 | 0.122 |
| 92  | 2  | 1 | 0.0156 | 0.0155 | 0.00224 | 0.109 |
| 108 | 1  | 1 | 0      | NaN    | NA      | NA    |

**Table S189.** Selendi station Kaplan-Meier drought risk estimates according to SPI-3, 6, and 12

| Drought Risk (SPI3) |              | Drought Risk (SPI6) |              | Drought Risk (SPI12) |              |
|---------------------|--------------|---------------------|--------------|----------------------|--------------|
| Time                | Drought Risk | Time                | Drought Risk | Time                 | Drought Risk |
| 0                   | 0.0128       | 0                   | 0.0152       | 1                    | 0.0312       |
| 1                   | 0.1026       | 1                   | 0.0455       | 2                    | 0.0469       |
| 2                   | 0.141        | 2                   | 0.0909       | 3                    | 0.0781       |
| 3                   | 0.1923       | 3                   | 0.1515       | 4                    | 0.125        |
| 4                   | 0.2692       | 4                   | 0.1667       | 5                    | 0.1719       |
| 5                   | 0.359        | 5                   | 0.1818       | 6                    | 0.2188       |
| 6                   | 0.4103       | 6                   | 0.2273       | 7                    | 0.25         |
| 7                   | 0.5128       | 7                   | 0.3333       | 8                    | 0.2812       |
| 8                   | 0.5769       | 8                   | 0.4242       | 9                    | 0.3125       |
| 9                   | 0.641        | 9                   | 0.4697       | 10                   | 0.3438       |
| 10                  | 0.7051       | 10                  | 0.5303       | 11                   | 0.3906       |
| 11                  | 0.7564       | 11                  | 0.5909       | 12                   | 0.4219       |
| 12                  | 0.8077       | 12                  | 0.6212       | 13                   | 0.4531       |
| 13                  | 0.8333       | 13                  | 0.6667       | 14                   | 0.4844       |
| 15                  | 0.8462       | 14                  | 0.697        | 15                   | 0.5156       |
| 16                  | 0.859        | 15                  | 0.7273       | 16                   | 0.5625       |
| 17                  | 0.8974       | 16                  | 0.7576       | 17                   | 0.6094       |
| 24                  | 0.9103       | 17                  | 0.7879       | 18                   | 0.6406       |



|    |        |    |        |     |        |
|----|--------|----|--------|-----|--------|
| 25 | 0.9231 | 18 | 0.8333 | 19  | 0.6719 |
| 29 | 0.9359 | 19 | 0.8636 | 20  | 0.7031 |
| 30 | 0.9487 | 20 | 0.8788 | 21  | 0.7344 |
| 31 | 0.9615 | 24 | 0.8939 | 22  | 0.75   |
| 32 | 0.9744 | 25 | 0.9091 | 23  | 0.7656 |
| 49 | 0.9872 | 26 | 0.9242 | 24  | 0.7812 |
| 50 | 1      | 77 | 0.9394 | 25  | 0.7969 |
|    |        | 78 | 0.9545 | 26  | 0.8125 |
|    |        | 79 | 0.9697 | 27  | 0.8281 |
|    |        | 86 | 0.9848 | 28  | 0.8438 |
|    |        | 87 | 1      | 29  | 0.875  |
|    |        |    |        | 30  | 0.8906 |
|    |        |    |        | 31  | 0.9062 |
|    |        |    |        | 32  | 0.9219 |
|    |        |    |        | 50  | 0.9375 |
|    |        |    |        | 51  | 0.9531 |
|    |        |    |        | 91  | 0.9688 |
|    |        |    |        | 92  | 0.9844 |
|    |        |    |        | 108 | 1      |

**Table S190.** Selendi station Kaplan-Meier survival estimates according to SPEI-3

| Kaplan-Meier Wet to Dry (SPEI3) |        |         |          |         |              |              |
|---------------------------------|--------|---------|----------|---------|--------------|--------------|
|                                 |        | n       | events   | median  | 0.95LCL      | 0.95UCL      |
|                                 |        | 76      | 76       | 9       | 7            | 13           |
| time                            | n.risk | n.event | survival | std.err | lower 95% CI | upper 95% CI |
| 0                               | 76     | 1       | 0.9868   | 0.0131  | 0.96155      | 10.000       |
| 1                               | 75     | 6       | 0.9079   | 0.0332  | 0.84515      | 0.9753       |
| 2                               | 69     | 4       | 0.8553   | 0.0404  | 0.77971      | 0.9381       |
| 3                               | 65     | 5       | 0.7895   | 0.0468  | 0.70294      | 0.8867       |
| 4                               | 60     | 4       | 0.7368   | 0.0505  | 0.6442       | 0.8428       |
| 5                               | 56     | 4       | 0.6842   | 0.0533  | 0.5873       | 0.7971       |
| 6                               | 52     | 3       | 0.6447   | 0.0549  | 0.54564      | 0.7618       |
| 7                               | 49     | 5       | 0.5789   | 0.0566  | 0.47794      | 0.7013       |
| 8                               | 44     | 5       | 0.5132   | 0.0573  | 0.41224      | 0.6388       |
| 9                               | 39     | 3       | 0.4737   | 0.0573  | 0.37374      | 0.6004       |
| 10                              | 36     | 4       | 0.4211   | 0.0566  | 0.32348      | 0.5481       |
| 11                              | 32     | 2       | 0.3947   | 0.0561  | 0.29882      | 0.5214       |
| 12                              | 30     | 1       | 0.3816   | 0.0557  | 0.2866       | 0.508        |
| 13                              | 29     | 1       | 0.3684   | 0.0553  | 0.27448      | 0.4945       |
| 14                              | 28     | 2       | 0.3421   | 0.0544  | 0.25047      | 0.4673       |
| 15                              | 26     | 2       | 0.3158   | 0.0533  | 0.22682      | 0.4397       |
| 16                              | 24     | 2       | 0.2895   | 0.052   | 0.20353      | 0.4117       |
| 17                              | 22     | 3       | 0.25     | 0.0497  | 0.16936      | 0.369        |

|    |    |   |        |        |         |        |
|----|----|---|--------|--------|---------|--------|
| 18 | 19 | 3 | 0.2105 | 0.0468 | 0.13622 | 0.3254 |
| 19 | 16 | 3 | 0.1711 | 0.0432 | 0.10428 | 0.2806 |
| 20 | 13 | 2 | 0.1447 | 0.0404 | 0.0838  | 0.25   |
| 21 | 11 | 2 | 0.1184 | 0.0371 | 0.06412 | 0.2187 |
| 22 | 9  | 3 | 0.0789 | 0.0309 | 0.03663 | 0.1702 |
| 23 | 6  | 2 | 0.0526 | 0.0256 | 0.02028 | 0.1366 |
| 24 | 4  | 1 | 0.0395 | 0.0223 | 0.01302 | 0.1197 |
| 25 | 3  | 1 | 0.0263 | 0.0184 | 0.0067  | 0.1033 |
| 47 | 2  | 1 | 0.0132 | 0.0131 | 0.00188 | 0.0922 |
| 48 | 1  | 1 | 0      | NaN    | NA      | NA     |

**Table S191.** Selendi station Kaplan-Meier survival estimates according to SPEI-6

| Kaplan-Meier Wet to Dry (SPEI6) |        |         |          |         |              |              |
|---------------------------------|--------|---------|----------|---------|--------------|--------------|
|                                 |        | n       | events   | median  | 0.95LCL      | 0.95UCL      |
|                                 |        | 67      | 67       | 15      | 9            | 20           |
| time                            | n.risk | n.event | survival | std.err | lower 95% CI | upper 95% CI |
| 0                               | 67     | 1       | 0.9851   | 0.0148  | 0.95646      | 1.000        |
| 1                               | 66     | 2       | 0.9552   | 0.0253  | 0.90696      | 1.000        |
| 2                               | 64     | 1       | 0.9403   | 0.0289  | 0.88524      | 0.999        |
| 3                               | 63     | 2       | 0.9104   | 0.0349  | 0.84458      | 0.981        |
| 4                               | 61     | 1       | 0.8955   | 0.0374  | 0.8252       | 0.972        |
| 5                               | 60     | 1       | 0.8806   | 0.0396  | 0.80628      | 0.962        |
| 6                               | 59     | 3       | 0.8358   | 0.0453  | 0.75166      | 0.929        |
| 7                               | 56     | 8       | 0.7164   | 0.0551  | 0.61623      | 0.833        |
| 8                               | 48     | 5       | 0.6418   | 0.0586  | 0.53667      | 0.768        |
| 9                               | 43     | 3       | 0.597    | 0.0599  | 0.4904       | 0.727        |
| 10                              | 40     | 2       | 0.5672   | 0.0605  | 0.46011      | 0.699        |
| 11                              | 38     | 1       | 0.5522   | 0.0608  | 0.44513      | 0.685        |
| 12                              | 37     | 1       | 0.5373   | 0.0609  | 0.43026      | 0.671        |
| 13                              | 36     | 1       | 0.5224   | 0.061   | 0.41549      | 0.657        |
| 14                              | 35     | 1       | 0.5075   | 0.0611  | 0.40082      | 0.642        |
| 15                              | 34     | 1       | 0.4925   | 0.0611  | 0.38626      | 0.628        |
| 16                              | 33     | 1       | 0.4776   | 0.061   | 0.37181      | 0.614        |
| 17                              | 32     | 1       | 0.4627   | 0.0609  | 0.35746      | 0.599        |
| 18                              | 31     | 2       | 0.4328   | 0.0605  | 0.32907      | 0.569        |
| 19                              | 29     | 3       | 0.3881   | 0.0595  | 0.28728      | 0.524        |
| 20                              | 26     | 2       | 0.3582   | 0.0586  | 0.25998      | 0.494        |
| 21                              | 24     | 2       | 0.3284   | 0.0574  | 0.23314      | 0.462        |
| 22                              | 22     | 1       | 0.3134   | 0.0567  | 0.21991      | 0.447        |
| 23                              | 21     | 3       | 0.2687   | 0.0542  | 0.18098      | 0.399        |
| 24                              | 18     | 3       | 0.2239   | 0.0509  | 0.14335      | 0.35         |
| 25                              | 15     | 3       | 0.1791   | 0.0468  | 0.10727      | 0.299        |
| 26                              | 12     | 2       | 0.1493   | 0.0435  | 0.08427      | 0.264        |

|    |    |   |        |        |         |       |
|----|----|---|--------|--------|---------|-------|
| 27 | 10 | 2 | 0.1194 | 0.0396 | 0.06232 | 0.229 |
| 28 | 8  | 2 | 0.0896 | 0.0349 | 0.04173 | 0.192 |
| 40 | 6  | 1 | 0.0746 | 0.0321 | 0.03211 | 0.173 |
| 41 | 5  | 1 | 0.0597 | 0.0289 | 0.02308 | 0.154 |
| 57 | 4  | 2 | 0.0299 | 0.0208 | 0.00762 | 0.117 |
| 58 | 2  | 2 | 0      | NaN    | NA      | NA    |

**Table S192.** Selendi station Kaplan-Meier survival estimates according to SPEI-12

| Kaplan-Meier Wet to Dry (SPEI12) |        |         |          |         |              |              |
|----------------------------------|--------|---------|----------|---------|--------------|--------------|
|                                  |        | n       | events   | median  | 0.95LCL      | 0.95UCL      |
|                                  |        | 81      | 81       | 15      | 12           | 21           |
| time                             | n.risk | n.event | survival | std.err | lower 95% CI | upper 95% CI |
| 1                                | 81     | 3       | 0.963    | 0.021   | 0.9227       | 10.000       |
| 2                                | 78     | 2       | 0.9383   | 0.0267  | 0.8873       | 0.9922       |
| 3                                | 76     | 3       | 0.9012   | 0.0331  | 0.83855      | 0.9686       |
| 4                                | 73     | 3       | 0.8642   | 0.0381  | 0.79272      | 0.9421       |
| 5                                | 70     | 3       | 0.8272   | 0.042   | 0.74878      | 0.9137       |
| 6                                | 67     | 3       | 0.7901   | 0.0452  | 0.70624      | 0.884        |
| 7                                | 64     | 3       | 0.7531   | 0.0479  | 0.6648       | 0.8531       |
| 8                                | 61     | 3       | 0.716    | 0.0501  | 0.62429      | 0.8213       |
| 9                                | 58     | 2       | 0.6914   | 0.0513  | 0.59774      | 0.7996       |
| 10                               | 56     | 2       | 0.6667   | 0.0524  | 0.57152      | 0.7777       |
| 11                               | 54     | 3       | 0.6296   | 0.0537  | 0.53278      | 0.7441       |
| 12                               | 51     | 4       | 0.5802   | 0.0548  | 0.48214      | 0.6983       |
| 13                               | 47     | 3       | 0.5432   | 0.0553  | 0.44488      | 0.6633       |
| 14                               | 44     | 3       | 0.5062   | 0.0556  | 0.40821      | 0.6276       |
| 15                               | 41     | 2       | 0.4815   | 0.0555  | 0.38409      | 0.6036       |
| 16                               | 39     | 2       | 0.4568   | 0.0553  | 0.36023      | 0.5792       |
| 17                               | 37     | 2       | 0.4321   | 0.055   | 0.33663      | 0.5546       |
| 18                               | 35     | 1       | 0.4198   | 0.0548  | 0.32493      | 0.5422       |
| 19                               | 34     | 1       | 0.4074   | 0.0546  | 0.3133       | 0.5298       |
| 20                               | 33     | 1       | 0.3951   | 0.0543  | 0.30174      | 0.5172       |
| 21                               | 32     | 3       | 0.358    | 0.0533  | 0.26746      | 0.4792       |
| 22                               | 29     | 3       | 0.321    | 0.0519  | 0.23385      | 0.4406       |
| 23                               | 26     | 2       | 0.2963   | 0.0507  | 0.21182      | 0.4145       |
| 24                               | 24     | 1       | 0.284    | 0.0501  | 0.20093      | 0.4013       |
| 25                               | 23     | 1       | 0.2716   | 0.0494  | 0.19013      | 0.388        |
| 26                               | 22     | 1       | 0.2593   | 0.0487  | 0.17942      | 0.3746       |
| 27                               | 21     | 1       | 0.2469   | 0.0479  | 0.1688       | 0.3612       |
| 28                               | 20     | 2       | 0.2222   | 0.0462  | 0.14786      | 0.334        |
| 29                               | 18     | 2       | 0.1975   | 0.0442  | 0.12735      | 0.3064       |
| 30                               | 16     | 1       | 0.1852   | 0.0432  | 0.11728      | 0.2924       |
| 31                               | 15     | 1       | 0.1728   | 0.042   | 0.10734      | 0.2783       |

|     |    |   |        |        |         |        |
|-----|----|---|--------|--------|---------|--------|
| 32  | 14 | 1 | 0.1605 | 0.0408 | 0.09753 | 0.2641 |
| 33  | 13 | 1 | 0.1481 | 0.0395 | 0.08788 | 0.2497 |
| 34  | 12 | 1 | 0.1358 | 0.0381 | 0.0784  | 0.2352 |
| 35  | 11 | 1 | 0.1235 | 0.0366 | 0.0691  | 0.2206 |
| 40  | 10 | 1 | 0.1111 | 0.0349 | 0.06001 | 0.2057 |
| 41  | 9  | 1 | 0.0988 | 0.0331 | 0.05116 | 0.1907 |
| 42  | 8  | 1 | 0.0864 | 0.0312 | 0.04257 | 0.1754 |
| 43  | 7  | 1 | 0.0741 | 0.0291 | 0.0343  | 0.16   |
| 44  | 6  | 1 | 0.0617 | 0.0267 | 0.02641 | 0.1443 |
| 45  | 5  | 1 | 0.0494 | 0.0241 | 0.01899 | 0.1284 |
| 46  | 4  | 1 | 0.037  | 0.021  | 0.0122  | 0.1124 |
| 59  | 3  | 1 | 0.0247 | 0.0172 | 0.00628 | 0.097  |
| 60  | 2  | 1 | 0.0123 | 0.0123 | 0.00176 | 0.0866 |
| 107 | 1  | 1 | 0      | NaN    | NA      | NA     |

**Table S193.** Selendi station Kaplan-Meier drought risk estimates according to SPEI-3, 6, and 12

| Drought Risk (SPEI3) |              | Drought Risk (SPEI6) |              | Drought Risk (SPEI12) |              |
|----------------------|--------------|----------------------|--------------|-----------------------|--------------|
| Time                 | Drought Risk | Time                 | Drought Risk | Time                  | Drought Risk |
| 0                    | 0.0132       | 0                    | 0.0149       | 1                     | 0.037        |
| 1                    | 0.0921       | 1                    | 0.0448       | 2                     | 0.0617       |
| 2                    | 0.1447       | 2                    | 0.0597       | 3                     | 0.0988       |
| 3                    | 0.2105       | 3                    | 0.0896       | 4                     | 0.1358       |
| 4                    | 0.2632       | 4                    | 0.1045       | 5                     | 0.1728       |
| 5                    | 0.3158       | 5                    | 0.1194       | 6                     | 0.2099       |
| 6                    | 0.3553       | 6                    | 0.1642       | 7                     | 0.2469       |
| 7                    | 0.4211       | 7                    | 0.2836       | 8                     | 0.284        |
| 8                    | 0.4868       | 8                    | 0.3582       | 9                     | 0.3086       |
| 9                    | 0.5263       | 9                    | 0.403        | 10                    | 0.3333       |
| 10                   | 0.5789       | 10                   | 0.4328       | 11                    | 0.3704       |
| 11                   | 0.6053       | 11                   | 0.4478       | 12                    | 0.4198       |
| 12                   | 0.6184       | 12                   | 0.4627       | 13                    | 0.4568       |
| 13                   | 0.6316       | 13                   | 0.4776       | 14                    | 0.4938       |
| 14                   | 0.6579       | 14                   | 0.4925       | 15                    | 0.5185       |
| 15                   | 0.6842       | 15                   | 0.5075       | 16                    | 0.5432       |
| 16                   | 0.7105       | 16                   | 0.5224       | 17                    | 0.5679       |
| 17                   | 0.75         | 17                   | 0.5373       | 18                    | 0.5802       |
| 18                   | 0.7895       | 18                   | 0.5672       | 19                    | 0.5926       |
| 19                   | 0.8289       | 19                   | 0.6119       | 20                    | 0.6049       |
| 20                   | 0.8553       | 20                   | 0.6418       | 21                    | 0.642        |
| 21                   | 0.8816       | 21                   | 0.6716       | 22                    | 0.679        |
| 22                   | 0.9211       | 22                   | 0.6866       | 23                    | 0.7037       |
| 23                   | 0.9474       | 23                   | 0.7313       | 24                    | 0.716        |
| 24                   | 0.9605       | 24                   | 0.7761       | 25                    | 0.7284       |
| 25                   | 0.9737       | 25                   | 0.8209       | 26                    | 0.7407       |

|    |        |    |        |     |        |
|----|--------|----|--------|-----|--------|
| 47 | 0.9868 | 26 | 0.8507 | 27  | 0.7531 |
| 48 | 1      | 27 | 0.8806 | 28  | 0.7778 |
|    |        | 28 | 0.9104 | 29  | 0.8025 |
|    |        | 40 | 0.9254 | 30  | 0.8148 |
|    |        | 41 | 0.9403 | 31  | 0.8272 |
|    |        | 57 | 0.9701 | 32  | 0.8395 |
|    |        | 58 | 1      | 33  | 0.8519 |
|    |        |    |        | 34  | 0.8642 |
|    |        |    |        | 35  | 0.8765 |
|    |        |    |        | 40  | 0.8889 |
|    |        |    |        | 41  | 0.9012 |
|    |        |    |        | 42  | 0.9136 |
|    |        |    |        | 43  | 0.9259 |
|    |        |    |        | 44  | 0.9383 |
|    |        |    |        | 45  | 0.9506 |
|    |        |    |        | 46  | 0.963  |
|    |        |    |        | 59  | 0.9753 |
|    |        |    |        | 60  | 0.9877 |
|    |        |    |        | 107 | 1      |

**Table S194.** Turgutlu station Kaplan-Meier survival estimates according to SPI-3

| Kaplan-Meier Wet to Dry (SPI3) |        |         |          |         |              |              |
|--------------------------------|--------|---------|----------|---------|--------------|--------------|
|                                |        | n       | events   | median  | 0.95LCL      | 0.95UCL      |
|                                |        | 123     | 123      | 9       | 7            | 10           |
| time                           | n.risk | n.event | survival | std.err | lower 95% CL | upper 95% CL |
| 1                              | 123    | 8       | 0.935    | 0.0222  | 0.89238      | 0.9796       |
| 2                              | 115    | 5       | 0.8943   | 0.0277  | 0.84159      | 0.9503       |
| 3                              | 110    | 6       | 0.8455   | 0.0326  | 0.78401      | 0.9119       |
| 4                              | 104    | 9       | 0.7724   | 0.0378  | 0.7017       | 0.8501       |
| 5                              | 95     | 6       | 0.7236   | 0.0403  | 0.6487       | 0.8071       |
| 6                              | 89     | 7       | 0.6667   | 0.0425  | 0.58835      | 0.7554       |
| 7                              | 82     | 11      | 0.5772   | 0.0445  | 0.49622      | 0.6715       |
| 8                              | 71     | 8       | 0.5122   | 0.0451  | 0.43106      | 0.6086       |
| 9                              | 63     | 8       | 0.4472   | 0.0448  | 0.36738      | 0.5442       |
| 10                             | 55     | 7       | 0.3902   | 0.044   | 0.31289      | 0.4867       |
| 11                             | 48     | 3       | 0.3659   | 0.0434  | 0.28991      | 0.4617       |
| 12                             | 45     | 2       | 0.3496   | 0.043   | 0.27471      | 0.4449       |
| 13                             | 43     | 2       | 0.3333   | 0.0425  | 0.25962      | 0.428        |
| 14                             | 41     | 1       | 0.3252   | 0.0422  | 0.25211      | 0.4195       |
| 15                             | 40     | 4       | 0.2927   | 0.041   | 0.22237      | 0.3852       |
| 16                             | 36     | 4       | 0.2602   | 0.0396  | 0.19312      | 0.3505       |
| 17                             | 32     | 5       | 0.2195   | 0.0373  | 0.1573       | 0.3063       |

|    |    |   |        |        |         |        |
|----|----|---|--------|--------|---------|--------|
| 18 | 27 | 4 | 0.187  | 0.0352 | 0.12936 | 0.2703 |
| 20 | 23 | 3 | 0.1626 | 0.0333 | 0.10888 | 0.2428 |
| 21 | 20 | 5 | 0.122  | 0.0295 | 0.0759  | 0.1959 |
| 22 | 15 | 3 | 0.0976 | 0.0268 | 0.057   | 0.167  |
| 23 | 12 | 2 | 0.0813 | 0.0246 | 0.04488 | 0.1473 |
| 24 | 10 | 3 | 0.0569 | 0.0209 | 0.02772 | 0.1168 |
| 25 | 7  | 2 | 0.0407 | 0.0178 | 0.01723 | 0.0959 |
| 27 | 5  | 1 | 0.0325 | 0.016  | 0.0124  | 0.0853 |
| 28 | 4  | 2 | 0.0163 | 0.0114 | 0.00411 | 0.0643 |
| 29 | 2  | 2 | 0      | NaN    | NA      | NA     |

**Table S195.** Turgutlu station Kaplan-Meier survival estimates according to SPI-6

| Kaplan-Meier Wet to Dry (SPI6) |        |         |          |         |              |              |
|--------------------------------|--------|---------|----------|---------|--------------|--------------|
|                                |        | n       | events   | median  | 0.95LCL      | 0.95UCL      |
|                                |        | 112     | 112      | 13      | 11           | 17           |
| time                           | n.risk | n.event | survival | std.err | lower 95% CL | upper 95% CL |
| 1                              | 112    | 12      | 0.89286  | 0.02923 | 0.83737      | 0.952        |
| 2                              | 100    | 10      | 0.80357  | 0.03754 | 0.73326      | 0.8806       |
| 3                              | 90     | 4       | 0.76786  | 0.03989 | 0.69352      | 0.8502       |
| 4                              | 86     | 2       | 0.75     | 0.04092 | 0.67394      | 0.8346       |
| 5                              | 84     | 2       | 0.73214  | 0.04184 | 0.65456      | 0.8189       |
| 6                              | 82     | 4       | 0.69643  | 0.04345 | 0.61627      | 0.787        |
| 7                              | 78     | 3       | 0.66964  | 0.04444 | 0.58796      | 0.7627       |
| 8                              | 75     | 4       | 0.63393  | 0.04552 | 0.55071      | 0.7297       |
| 9                              | 71     | 2       | 0.61607  | 0.04595 | 0.53228      | 0.7131       |
| 10                             | 69     | 3       | 0.58929  | 0.04649 | 0.50487      | 0.6878       |
| 11                             | 66     | 5       | 0.54464  | 0.04706 | 0.4598       | 0.6451       |
| 12                             | 61     | 2       | 0.52679  | 0.04718 | 0.44198      | 0.6279       |
| 13                             | 59     | 4       | 0.49107  | 0.04724 | 0.40669      | 0.593        |
| 14                             | 55     | 2       | 0.47321  | 0.04718 | 0.38922      | 0.5753       |
| 15                             | 53     | 4       | 0.4375   | 0.04687 | 0.35463      | 0.5397       |
| 16                             | 49     | 3       | 0.41071  | 0.04649 | 0.329        | 0.5127       |
| 17                             | 46     | 3       | 0.38393  | 0.04595 | 0.30364      | 0.4854       |
| 18                             | 43     | 3       | 0.35714  | 0.04528 | 0.27857      | 0.4579       |
| 19                             | 40     | 4       | 0.32143  | 0.04413 | 0.2456       | 0.4207       |
| 20                             | 36     | 3       | 0.29464  | 0.04308 | 0.22123      | 0.3924       |
| 21                             | 33     | 3       | 0.26786  | 0.04184 | 0.19721      | 0.3638       |
| 22                             | 30     | 1       | 0.25893  | 0.04139 | 0.18928      | 0.3542       |
| 23                             | 29     | 1       | 0.25     | 0.04092 | 0.1814       | 0.3445       |
| 24                             | 28     | 1       | 0.24107  | 0.04042 | 0.17355      | 0.3349       |
| 25                             | 27     | 3       | 0.21429  | 0.03877 | 0.15031      | 0.3055       |
| 26                             | 24     | 4       | 0.17857  | 0.03619 | 0.12003      | 0.2657       |
| 27                             | 20     | 2       | 0.16071  | 0.0347  | 0.10526      | 0.2454       |

|    |    |   |         |         |         |        |
|----|----|---|---------|---------|---------|--------|
| 28 | 18 | 2 | 0.14286 | 0.03307 | 0.09076 | 0.2249 |
| 29 | 16 | 1 | 0.13393 | 0.03218 | 0.08363 | 0.2145 |
| 30 | 15 | 1 | 0.125   | 0.03125 | 0.07658 | 0.204  |
| 34 | 14 | 1 | 0.11607 | 0.03027 | 0.06963 | 0.1935 |
| 35 | 13 | 1 | 0.10714 | 0.02923 | 0.06277 | 0.1829 |
| 36 | 12 | 1 | 0.09821 | 0.02812 | 0.05603 | 0.1721 |
| 37 | 11 | 1 | 0.08929 | 0.02694 | 0.04942 | 0.1613 |
| 38 | 10 | 1 | 0.08036 | 0.02569 | 0.04295 | 0.1504 |
| 39 | 9  | 1 | 0.07143 | 0.02434 | 0.03663 | 0.1393 |
| 40 | 8  | 2 | 0.05357 | 0.02128 | 0.0246  | 0.1167 |
| 41 | 6  | 2 | 0.03571 | 0.01754 | 0.01364 | 0.0935 |
| 43 | 4  | 1 | 0.02679 | 0.01526 | 0.00877 | 0.0818 |
| 44 | 3  | 1 | 0.01786 | 0.01251 | 0.00452 | 0.0705 |
| 45 | 2  | 1 | 0.00893 | 0.00889 | 0.00127 | 0.0628 |
| 58 | 1  | 1 | 0       | NaN     | NA      | NA     |

**Table S196.** Turgutlu station Kaplan-Meier survival estimates according to SPI-12

| Kaplan-Meier Wet to Dry (SPI12) |        |         |          |         |              |              |
|---------------------------------|--------|---------|----------|---------|--------------|--------------|
|                                 |        | n       | events   | median  | 0.95LCL      | 0.95UCL      |
|                                 |        | 101     | 101      | 18      | 16           | 20           |
| time                            | n.risk | n.event | survival | std.err | lower 95% CL | upper 95% CL |
| 1                               | 101    | 2       | 0.9802   | 0.01386 | 0.9534       | 1            |
| 2                               | 99     | 3       | 0.9505   | 0.02158 | 0.90912      | 0.9938       |
| 3                               | 96     | 4       | 0.9109   | 0.02835 | 0.85699      | 0.9682       |
| 4                               | 92     | 1       | 0.901    | 0.02972 | 0.84458      | 0.9612       |
| 5                               | 91     | 2       | 0.8812   | 0.0322  | 0.82029      | 0.9466       |
| 6                               | 89     | 3       | 0.8515   | 0.03538 | 0.78488      | 0.9237       |
| 7                               | 86     | 2       | 0.8317   | 0.03723 | 0.76182      | 0.9079       |
| 8                               | 84     | 2       | 0.8119   | 0.03889 | 0.73913      | 0.8918       |
| 9                               | 82     | 2       | 0.7921   | 0.04038 | 0.71676      | 0.8753       |
| 10                              | 80     | 1       | 0.7822   | 0.04107 | 0.70568      | 0.867        |
| 11                              | 79     | 3       | 0.7525   | 0.04294 | 0.67284      | 0.8415       |
| 12                              | 76     | 4       | 0.7129   | 0.04502 | 0.62988      | 0.8068       |
| 13                              | 72     | 3       | 0.6832   | 0.04629 | 0.5982       | 0.7802       |
| 14                              | 69     | 3       | 0.6535   | 0.04735 | 0.56695      | 0.7532       |
| 15                              | 66     | 4       | 0.6139   | 0.04844 | 0.52589      | 0.7165       |
| 16                              | 62     | 5       | 0.5644   | 0.04934 | 0.47549      | 0.6698       |
| 17                              | 57     | 5       | 0.5149   | 0.04973 | 0.42605      | 0.6222       |
| 18                              | 52     | 5       | 0.4653   | 0.04963 | 0.37756      | 0.5735       |
| 19                              | 47     | 5       | 0.4158   | 0.04904 | 0.33002      | 0.524        |
| 20                              | 42     | 4       | 0.3762   | 0.0482  | 0.29269      | 0.4836       |
| 21                              | 38     | 3       | 0.3465   | 0.04735 | 0.26512      | 0.453        |
| 22                              | 35     | 3       | 0.3168   | 0.04629 | 0.23793      | 0.4219       |

|     |    |   |        |         |         |        |
|-----|----|---|--------|---------|---------|--------|
| 23  | 32 | 2 | 0.297  | 0.04547 | 0.22004 | 0.401  |
| 24  | 30 | 3 | 0.2673 | 0.04404 | 0.19356 | 0.3692 |
| 25  | 27 | 2 | 0.2475 | 0.04294 | 0.17617 | 0.3478 |
| 26  | 25 | 2 | 0.2277 | 0.04173 | 0.15901 | 0.3261 |
| 27  | 23 | 2 | 0.2079 | 0.04038 | 0.1421  | 0.3042 |
| 28  | 21 | 1 | 0.198  | 0.03965 | 0.13374 | 0.2932 |
| 29  | 20 | 1 | 0.1881 | 0.03889 | 0.12545 | 0.2821 |
| 30  | 19 | 1 | 0.1782 | 0.03808 | 0.11724 | 0.2709 |
| 31  | 18 | 1 | 0.1683 | 0.03723 | 0.10911 | 0.2597 |
| 32  | 17 | 1 | 0.1584 | 0.03633 | 0.10106 | 0.2483 |
| 35  | 16 | 1 | 0.1485 | 0.03538 | 0.0931  | 0.2369 |
| 36  | 15 | 1 | 0.1386 | 0.03438 | 0.08524 | 0.2254 |
| 37  | 14 | 1 | 0.1287 | 0.03332 | 0.07749 | 0.2138 |
| 38  | 13 | 2 | 0.1089 | 0.031   | 0.06235 | 0.1903 |
| 39  | 11 | 2 | 0.0891 | 0.02835 | 0.04777 | 0.1662 |
| 59  | 9  | 1 | 0.0792 | 0.02687 | 0.04074 | 0.154  |
| 79  | 8  | 1 | 0.0693 | 0.02527 | 0.03392 | 0.1416 |
| 80  | 7  | 1 | 0.0594 | 0.02352 | 0.02734 | 0.1291 |
| 81  | 6  | 1 | 0.0495 | 0.02158 | 0.02106 | 0.1164 |
| 89  | 5  | 1 | 0.0396 | 0.01941 | 0.01516 | 0.1035 |
| 90  | 4  | 1 | 0.0297 | 0.01689 | 0.00974 | 0.0905 |
| 194 | 3  | 1 | 0.0198 | 0.01386 | 0.00502 | 0.0781 |
| 195 | 2  | 1 | 0.0099 | 0.00985 | 0.00141 | 0.0696 |
| 196 | 1  | 1 | 0      | NaN     | NA      | NA     |

**Table S197.** Turgutlu station Kaplan-Meier drought risk estimates according to SPI-3, 6, and 12

| Drought Risk (SPI3) |              | Drought Risk (SPI6) |              | Drought Risk (SPI12) |              |
|---------------------|--------------|---------------------|--------------|----------------------|--------------|
| Time                | Drought Risk | Time                | Drought Risk | Time                 | Drought Risk |
| 1                   | 0.065        | 1                   | 0.10714      | 1                    | 0.0198       |
| 2                   | 0.1057       | 2                   | 0.19643      | 2                    | 0.0495       |
| 3                   | 0.1545       | 3                   | 0.23214      | 3                    | 0.0891       |
| 4                   | 0.2276       | 4                   | 0.25         | 4                    | 0.099        |
| 5                   | 0.2764       | 5                   | 0.26786      | 5                    | 0.1188       |
| 6                   | 0.3333       | 6                   | 0.30357      | 6                    | 0.1485       |
| 7                   | 0.4228       | 7                   | 0.33036      | 7                    | 0.1683       |
| 8                   | 0.4878       | 8                   | 0.36607      | 8                    | 0.1881       |
| 9                   | 0.5528       | 9                   | 0.38393      | 9                    | 0.2079       |
| 10                  | 0.6098       | 10                  | 0.41071      | 10                   | 0.2178       |
| 11                  | 0.6341       | 11                  | 0.45536      | 11                   | 0.2475       |
| 12                  | 0.6504       | 12                  | 0.47321      | 12                   | 0.2871       |
| 13                  | 0.6667       | 13                  | 0.50893      | 13                   | 0.3168       |
| 14                  | 0.6748       | 14                  | 0.52679      | 14                   | 0.3465       |
| 15                  | 0.7073       | 15                  | 0.5625       | 15                   | 0.3861       |



|    |        |    |         |     |        |
|----|--------|----|---------|-----|--------|
| 16 | 0.7398 | 16 | 0.58929 | 16  | 0.4356 |
| 17 | 0.7805 | 17 | 0.61607 | 17  | 0.4851 |
| 18 | 0.813  | 18 | 0.64286 | 18  | 0.5347 |
| 20 | 0.8374 | 19 | 0.67857 | 19  | 0.5842 |
| 21 | 0.878  | 20 | 0.70536 | 20  | 0.6238 |
| 22 | 0.9024 | 21 | 0.73214 | 21  | 0.6535 |
| 23 | 0.9187 | 22 | 0.74107 | 22  | 0.6832 |
| 24 | 0.9431 | 23 | 0.75    | 23  | 0.703  |
| 25 | 0.9593 | 24 | 0.75893 | 24  | 0.7327 |
| 27 | 0.9675 | 25 | 0.78571 | 25  | 0.7525 |
| 28 | 0.9837 | 26 | 0.82143 | 26  | 0.7723 |
| 29 | 1      | 27 | 0.83929 | 27  | 0.7921 |
|    |        | 28 | 0.85714 | 28  | 0.802  |
|    |        | 29 | 0.86607 | 29  | 0.8119 |
|    |        | 30 | 0.875   | 30  | 0.8218 |
|    |        | 34 | 0.88393 | 31  | 0.8317 |
|    |        | 35 | 0.89286 | 32  | 0.8416 |
|    |        | 36 | 0.90179 | 35  | 0.8515 |
|    |        | 37 | 0.91071 | 36  | 0.8614 |
|    |        | 38 | 0.91964 | 37  | 0.8713 |
|    |        | 39 | 0.92857 | 38  | 0.8911 |
|    |        | 40 | 0.94643 | 39  | 0.9109 |
|    |        | 41 | 0.96429 | 59  | 0.9208 |
|    |        | 43 | 0.97321 | 79  | 0.9307 |
|    |        | 44 | 0.98214 | 80  | 0.9406 |
|    |        | 45 | 0.99107 | 81  | 0.9505 |
|    |        | 58 | 1       | 89  | 0.9604 |
|    |        |    |         | 90  | 0.9703 |
|    |        |    |         | 194 | 0.9802 |
|    |        |    |         | 195 | 0.9901 |
|    |        |    |         | 196 | 1      |

**Table S198.** Turgutlu station Kaplan-Meier survival estimates according to SPEI-3

| Kaplan-Meier Wet to Dry (SPEI3) |        |         |          |         |              |              |
|---------------------------------|--------|---------|----------|---------|--------------|--------------|
|                                 |        | n       | events   | median  | 0.95LCL      | 0.95UCL      |
|                                 |        | 43      | 43       | 6       | 4            | 12           |
| time                            | n.risk | n.event | survival | std.err | lower 95% CI | upper 95% CI |
| 1                               | 43     | 5       | 0.8837   | 0.0489  | 0.79292      | 0.985        |
| 2                               | 38     | 3       | 0.814    | 0.0593  | 0.70557      | 0.939        |
| 3                               | 35     | 4       | 0.7209   | 0.0684  | 0.59859      | 0.868        |
| 4                               | 31     | 6       | 0.5814   | 0.0752  | 0.45116      | 0.749        |
| 5                               | 25     | 3       | 0.5116   | 0.0762  | 0.38206      | 0.685        |

|    |    |   |        |        |         |       |
|----|----|---|--------|--------|---------|-------|
| 6  | 22 | 1 | 0.4884 | 0.0762 | 0.35966 | 0.663 |
| 7  | 21 | 3 | 0.4186 | 0.0752 | 0.29432 | 0.595 |
| 9  | 18 | 1 | 0.3953 | 0.0746 | 0.27318 | 0.572 |
| 10 | 17 | 1 | 0.3721 | 0.0737 | 0.25236 | 0.549 |
| 11 | 16 | 2 | 0.3256 | 0.0715 | 0.21176 | 0.501 |
| 12 | 14 | 1 | 0.3023 | 0.07   | 0.19199 | 0.476 |
| 13 | 13 | 2 | 0.2558 | 0.0665 | 0.15365 | 0.426 |
| 14 | 11 | 2 | 0.2093 | 0.062  | 0.11708 | 0.374 |
| 15 | 9  | 2 | 0.1628 | 0.0563 | 0.08265 | 0.321 |
| 16 | 7  | 2 | 0.1163 | 0.0489 | 0.05101 | 0.265 |
| 17 | 5  | 1 | 0.093  | 0.0443 | 0.03658 | 0.237 |
| 21 | 4  | 2 | 0.0465 | 0.0321 | 0.01202 | 0.18  |
| 22 | 2  | 1 | 0.0233 | 0.023  | 0.00335 | 0.161 |
| 27 | 1  | 1 | 0      | NaN    | NA      | NA    |

**Table S199.** Turgutlu station Kaplan-Meier survival estimates according to SPEI-6

| Kaplan-Meier Wet to Dry (SPEI6) |        |         |          |         |              |              |
|---------------------------------|--------|---------|----------|---------|--------------|--------------|
|                                 |        | n       | events   | median  | 0.95LCL      | 0.95UCL      |
|                                 |        | 35      | 35       | 15      | 11           | 19           |
| time                            | n.risk | n.event | survival | std.err | lower 95% CI | upper 95% CI |
| 2                               | 35     | 1       | 0.9714   | 0.0282  | 0.91777      | 1.000        |
| 3                               | 34     | 2       | 0.9143   | 0.0473  | 0.82609      | 1.000        |
| 6                               | 32     | 2       | 0.8571   | 0.0591  | 0.74871      | 0.981        |
| 7                               | 30     | 1       | 0.8286   | 0.0637  | 0.71266      | 0.963        |
| 8                               | 29     | 1       | 0.8      | 0.0676  | 0.67788      | 0.944        |
| 9                               | 28     | 2       | 0.7429   | 0.0739  | 0.6113       | 0.903        |
| 10                              | 26     | 3       | 0.6571   | 0.0802  | 0.51729      | 0.835        |
| 11                              | 23     | 2       | 0.6      | 0.0828  | 0.4578       | 0.786        |
| 12                              | 21     | 1       | 0.5714   | 0.0836  | 0.4289       | 0.761        |
| 13                              | 20     | 1       | 0.5429   | 0.0842  | 0.40055      | 0.736        |
| 14                              | 19     | 1       | 0.5143   | 0.0845  | 0.37272      | 0.71         |
| 15                              | 18     | 1       | 0.4857   | 0.0845  | 0.34541      | 0.683        |
| 16                              | 17     | 1       | 0.4571   | 0.0842  | 0.31861      | 0.656        |
| 17                              | 16     | 3       | 0.3714   | 0.0817  | 0.24138      | 0.572        |
| 18                              | 13     | 2       | 0.3143   | 0.0785  | 0.19266      | 0.513        |
| 19                              | 11     | 2       | 0.2571   | 0.0739  | 0.14643      | 0.452        |
| 20                              | 9      | 2       | 0.2      | 0.0676  | 0.1031       | 0.388        |
| 21                              | 7      | 2       | 0.1429   | 0.0591  | 0.06346      | 0.322        |
| 22                              | 5      | 1       | 0.1143   | 0.0538  | 0.04544      | 0.287        |
| 23                              | 4      | 1       | 0.0857   | 0.0473  | 0.02905      | 0.253        |
| 41                              | 3      | 1       | 0.0571   | 0.0392  | 0.01488      | 0.219        |
| 58                              | 2      | 1       | 0.0286   | 0.0282  | 0.00414      | 0.197        |

|    |   |   |   |     |    |    |
|----|---|---|---|-----|----|----|
| 59 | 1 | 1 | 0 | NaN | NA | NA |
|----|---|---|---|-----|----|----|

**Table S200.** Turgutlu station Kaplan-Meier survival estimates according to SPEI-12

| Kaplan-Meier Wet to Dry (SPEI12) |        |         |          |         |              |              |
|----------------------------------|--------|---------|----------|---------|--------------|--------------|
|                                  |        | n       | events   | median  | 0.95LCL      | 0.95UCL      |
|                                  |        | 37      | 37       | 22      | 20           | 70           |
| time                             | n.risk | n.event | survival | std.err | lower 95% CI | upper 95% CI |
| 0                                | 37     | 1       | 0.973    | 0.0267  | 0.9221       | 1.000        |
| 14                               | 36     | 1       | 0.9459   | 0.0372  | 0.87582      | 1.000        |
| 15                               | 35     | 2       | 0.8919   | 0.051   | 0.79725      | 0.998        |
| 16                               | 33     | 3       | 0.8108   | 0.0644  | 0.69394      | 0.947        |
| 17                               | 30     | 2       | 0.7568   | 0.0705  | 0.63041      | 0.908        |
| 18                               | 28     | 2       | 0.7027   | 0.0751  | 0.56984      | 0.867        |
| 19                               | 26     | 2       | 0.6486   | 0.0785  | 0.5117       | 0.822        |
| 20                               | 24     | 2       | 0.5946   | 0.0807  | 0.45569      | 0.776        |
| 21                               | 22     | 2       | 0.5405   | 0.0819  | 0.40162      | 0.728        |
| 22                               | 20     | 2       | 0.4865   | 0.0822  | 0.34938      | 0.677        |
| 23                               | 18     | 1       | 0.4595   | 0.0819  | 0.32394      | 0.652        |
| 24                               | 17     | 2       | 0.4054   | 0.0807  | 0.27442      | 0.599        |
| 25                               | 15     | 1       | 0.3784   | 0.0797  | 0.25036      | 0.572        |
| 38                               | 14     | 1       | 0.3514   | 0.0785  | 0.22678      | 0.544        |
| 69                               | 13     | 1       | 0.3243   | 0.077   | 0.2037       | 0.516        |
| 70                               | 12     | 1       | 0.2973   | 0.0751  | 0.18116      | 0.488        |
| 71                               | 11     | 1       | 0.2703   | 0.073   | 0.15917      | 0.459        |
| 72                               | 10     | 1       | 0.2432   | 0.0705  | 0.13779      | 0.429        |
| 73                               | 9      | 1       | 0.2162   | 0.0677  | 0.11707      | 0.399        |
| 74                               | 8      | 1       | 0.1892   | 0.0644  | 0.0971       | 0.369        |
| 75                               | 7      | 1       | 0.1622   | 0.0606  | 0.07796      | 0.337        |
| 76                               | 6      | 1       | 0.1351   | 0.0562  | 0.05981      | 0.305        |
| 77                               | 5      | 1       | 0.1081   | 0.051   | 0.04285      | 0.273        |
| 78                               | 4      | 1       | 0.0811   | 0.0449  | 0.0274       | 0.24         |
| 79                               | 3      | 1       | 0.0541   | 0.0372  | 0.01404      | 0.208        |
| 80                               | 2      | 1       | 0.027    | 0.0267  | 0.00391      | 0.187        |
| 81                               | 1      | 1       | 0        | NaN     | NA           | NA           |

**Table S201.** Turgutlu station Kaplan-Meier drought risk estimates according to SPEI-3, 6, and 12

| Drought Risk (SPEI3) |              | Drought Risk (SPEI6) |              | Drought Risk (SPEI12) |              |
|----------------------|--------------|----------------------|--------------|-----------------------|--------------|
| Time                 | Drought Risk | Time                 | Drought Risk | Time                  | Drought Risk |
| 1                    | 0.1163       | 2                    | 0.0286       | 0                     | 0.027        |
| 2                    | 0.186        | 3                    | 0.0857       | 3                     | 0.032807     |
| 3                    | 0.2791       | 6                    | 0.1429       | 6                     | 0.038614     |

|    |        |    |        |    |          |
|----|--------|----|--------|----|----------|
| 4  | 0.4186 | 7  | 0.1714 | 12 | 0.050229 |
| 5  | 0.4884 | 8  | 0.2    | 14 | 0.0541   |
| 6  | 0.5116 | 9  | 0.2571 | 15 | 0.1081   |
| 7  | 0.5814 | 10 | 0.3429 | 16 | 0.1892   |
| 9  | 0.6047 | 11 | 0.4    | 17 | 0.2432   |
| 10 | 0.6279 | 12 | 0.4286 | 18 | 0.2973   |
| 11 | 0.6744 | 13 | 0.4571 | 19 | 0.3514   |
| 12 | 0.6977 | 14 | 0.4857 | 20 | 0.4054   |
| 13 | 0.7442 | 15 | 0.5143 | 21 | 0.4595   |
| 14 | 0.7907 | 16 | 0.5429 | 22 | 0.5135   |
| 15 | 0.8372 | 17 | 0.6286 | 23 | 0.5405   |
| 16 | 0.8837 | 18 | 0.6857 | 24 | 0.5946   |
| 17 | 0.907  | 19 | 0.7429 | 25 | 0.6216   |
| 21 | 0.9535 | 20 | 0.8    | 38 | 0.6486   |
| 22 | 0.9767 | 21 | 0.8571 | 69 | 0.6757   |
| 27 | 1      | 22 | 0.8857 | 70 | 0.7027   |
|    |        | 23 | 0.9143 | 71 | 0.7297   |
|    |        | 41 | 0.9429 | 72 | 0.7568   |
|    |        | 58 | 0.9714 | 73 | 0.7838   |
|    |        | 59 | 1      | 74 | 0.8108   |
|    |        |    |        | 75 | 0.8378   |
|    |        |    |        | 76 | 0.8649   |
|    |        |    |        | 77 | 0.8919   |
|    |        |    |        | 78 | 0.9189   |
|    |        |    |        | 79 | 0.9459   |
|    |        |    |        | 80 | 0.973    |
|    |        |    |        | 81 | 1        |

**Table S202.** Ulubey station Kaplan-Meier survival estimates according to SPI-3

| Kaplan-Meier Wet to Dry (SPI3) |        |         |          |         |              |              |
|--------------------------------|--------|---------|----------|---------|--------------|--------------|
|                                |        | n       | events   | median  | 0.95LCL      | 0.95UCL      |
|                                |        | 69      | 69       | 6       | 5            | 8            |
| time                           | n.risk | n.event | survival | std.err | lower 95% CL | upper 95% CL |
| 1                              | 69     | 9       | 0.8696   | 0.0405  | 0.79362      | 0.953        |
| 2                              | 60     | 5       | 0.7971   | 0.0484  | 0.70764      | 0.898        |
| 3                              | 55     | 7       | 0.6957   | 0.0554  | 0.59513      | 0.813        |
| 4                              | 48     | 5       | 0.6232   | 0.0583  | 0.51873      | 0.749        |
| 5                              | 43     | 5       | 0.5507   | 0.0599  | 0.44502      | 0.682        |
| 6                              | 38     | 6       | 0.4638   | 0.06    | 0.35984      | 0.598        |
| 7                              | 32     | 6       | 0.3768   | 0.0583  | 0.27819      | 0.51         |
| 8                              | 26     | 1       | 0.3623   | 0.0579  | 0.26494      | 0.495        |
| 9                              | 25     | 2       | 0.3333   | 0.0568  | 0.23876      | 0.465        |
| 10                             | 23     | 2       | 0.3043   | 0.0554  | 0.21303      | 0.435        |

|    |    |   |        |        |         |       |
|----|----|---|--------|--------|---------|-------|
| 13 | 21 | 1 | 0.2899 | 0.0546 | 0.20035 | 0.419 |
| 14 | 20 | 2 | 0.2609 | 0.0529 | 0.17536 | 0.388 |
| 15 | 18 | 2 | 0.2319 | 0.0508 | 0.15093 | 0.356 |
| 18 | 16 | 2 | 0.2029 | 0.0484 | 0.12711 | 0.324 |
| 20 | 14 | 1 | 0.1884 | 0.0471 | 0.11545 | 0.307 |
| 21 | 13 | 2 | 0.1594 | 0.0441 | 0.09273 | 0.274 |
| 22 | 11 | 3 | 0.1159 | 0.0385 | 0.06043 | 0.222 |
| 23 | 8  | 2 | 0.087  | 0.0339 | 0.04048 | 0.187 |
| 26 | 6  | 2 | 0.058  | 0.0281 | 0.02239 | 0.15  |
| 27 | 4  | 1 | 0.0435 | 0.0246 | 0.01438 | 0.131 |
| 28 | 3  | 1 | 0.029  | 0.0202 | 0.0074  | 0.114 |
| 40 | 2  | 1 | 0.0145 | 0.0144 | 0.00207 | 0.101 |
| 41 | 1  | 1 | 0      | NaN    | NA      | NA    |

**Table S203.** Ulubey station Kaplan-Meier survival estimates according to SPI-6

| Kaplan-Meier Wet to Dry (SPI6) |        |         |          |         |              |              |
|--------------------------------|--------|---------|----------|---------|--------------|--------------|
|                                |        | n       | events   | median  | 0.95LCL      | 0.95UCL      |
|                                |        | 66      | 66       | 10      | 8            | 15           |
| time                           | n.risk | n.event | survival | std.err | lower 95% CL | upper 95% CL |
| 1                              | 66     | 3       | 0.9545   | 0.0256  | 0.90559      | 1            |
| 2                              | 63     | 4       | 0.8939   | 0.0379  | 0.82266      | 0.971        |
| 3                              | 59     | 5       | 0.8182   | 0.0475  | 0.73023      | 0.917        |
| 4                              | 54     | 1       | 0.803    | 0.049   | 0.71259      | 0.905        |
| 5                              | 53     | 1       | 0.7879   | 0.0503  | 0.69517      | 0.893        |
| 6                              | 52     | 4       | 0.7273   | 0.0548  | 0.62739      | 0.843        |
| 7                              | 48     | 6       | 0.6364   | 0.0592  | 0.53028      | 0.764        |
| 8                              | 42     | 4       | 0.5758   | 0.0608  | 0.46806      | 0.708        |
| 9                              | 38     | 4       | 0.5152   | 0.0615  | 0.40765      | 0.651        |
| 10                             | 34     | 4       | 0.4545   | 0.0613  | 0.34898      | 0.592        |
| 11                             | 30     | 2       | 0.4242   | 0.0608  | 0.3203       | 0.562        |
| 12                             | 28     | 1       | 0.4091   | 0.0605  | 0.30612      | 0.547        |
| 13                             | 27     | 1       | 0.3939   | 0.0601  | 0.29206      | 0.531        |
| 14                             | 26     | 1       | 0.3788   | 0.0597  | 0.27811      | 0.516        |
| 15                             | 25     | 2       | 0.3485   | 0.0587  | 0.25057      | 0.485        |
| 16                             | 23     | 1       | 0.3333   | 0.058   | 0.23698      | 0.469        |
| 17                             | 22     | 1       | 0.3182   | 0.0573  | 0.22351      | 0.453        |
| 18                             | 21     | 2       | 0.2879   | 0.0557  | 0.19698      | 0.421        |
| 19                             | 19     | 1       | 0.2727   | 0.0548  | 0.18392      | 0.404        |
| 20                             | 18     | 1       | 0.2576   | 0.0538  | 0.17101      | 0.388        |
| 23                             | 17     | 1       | 0.2424   | 0.0528  | 0.15825      | 0.371        |
| 24                             | 16     | 1       | 0.2273   | 0.0516  | 0.14566      | 0.355        |
| 25                             | 15     | 1       | 0.2121   | 0.0503  | 0.13325      | 0.338        |
| 31                             | 14     | 1       | 0.197    | 0.049   | 0.12102      | 0.321        |
| 32                             | 13     | 1       | 0.1818   | 0.0475  | 0.10899      | 0.303        |

|    |    |   |        |        |         |       |
|----|----|---|--------|--------|---------|-------|
| 33 | 12 | 1 | 0.1667 | 0.0459 | 0.09718 | 0.286 |
| 35 | 11 | 1 | 0.1515 | 0.0441 | 0.08561 | 0.268 |
| 36 | 10 | 1 | 0.1364 | 0.0422 | 0.07431 | 0.25  |
| 37 | 9  | 1 | 0.1212 | 0.0402 | 0.0633  | 0.232 |
| 38 | 8  | 1 | 0.1061 | 0.0379 | 0.05265 | 0.214 |
| 39 | 7  | 1 | 0.0909 | 0.0354 | 0.04239 | 0.195 |
| 40 | 6  | 1 | 0.0758 | 0.0326 | 0.03262 | 0.176 |
| 41 | 5  | 1 | 0.0606 | 0.0294 | 0.02344 | 0.157 |
| 42 | 4  | 1 | 0.0455 | 0.0256 | 0.01505 | 0.137 |
| 43 | 3  | 1 | 0.0303 | 0.0211 | 0.00774 | 0.119 |
| 50 | 2  | 1 | 0.0152 | 0.015  | 0.00217 | 0.106 |
| 56 | 1  | 1 | 0      | NaN    | NA      | NA    |

**Table S204.** Ulubey station Kaplan-Meier survival estimates according to SPI-12

| Kaplan-Meier Wet to Dry (SPI12) |        |         |          |         |              |              |
|---------------------------------|--------|---------|----------|---------|--------------|--------------|
|                                 |        | n       | events   | median  | 0.95LCL      | 0.95UCL      |
|                                 |        | 65      | 65       | 6       | 4            | 12           |
| time                            | n.risk | n.event | survival | std.err | lower 95% CL | upper 95% CL |
| 1                               | 65     | 5       | 0.9231   | 0.0331  | 0.86052      | 0.99         |
| 2                               | 60     | 8       | 0.8      | 0.0496  | 0.70844      | 0.903        |
| 3                               | 52     | 6       | 0.7077   | 0.0564  | 0.60533      | 0.827        |
| 4                               | 46     | 7       | 0.6      | 0.0608  | 0.49198      | 0.732        |
| 5                               | 39     | 5       | 0.5231   | 0.062   | 0.41472      | 0.66         |
| 6                               | 34     | 4       | 0.4615   | 0.0618  | 0.35495      | 0.6          |
| 7                               | 30     | 2       | 0.4308   | 0.0614  | 0.32575      | 0.57         |
| 8                               | 28     | 1       | 0.4154   | 0.0611  | 0.31131      | 0.554        |
| 9                               | 27     | 1       | 0.4      | 0.0608  | 0.297        | 0.539        |
| 10                              | 26     | 1       | 0.3846   | 0.0603  | 0.2828       | 0.523        |
| 11                              | 25     | 1       | 0.3692   | 0.0599  | 0.26872      | 0.507        |
| 12                              | 24     | 1       | 0.3538   | 0.0593  | 0.25477      | 0.491        |
| 13                              | 23     | 2       | 0.3231   | 0.058   | 0.22724      | 0.459        |
| 14                              | 21     | 1       | 0.3077   | 0.0572  | 0.21367      | 0.443        |
| 15                              | 20     | 1       | 0.2923   | 0.0564  | 0.20025      | 0.427        |
| 16                              | 19     | 1       | 0.2769   | 0.0555  | 0.18696      | 0.41         |
| 17                              | 18     | 1       | 0.2615   | 0.0545  | 0.17383      | 0.393        |
| 26                              | 17     | 1       | 0.2462   | 0.0534  | 0.16086      | 0.377        |
| 27                              | 16     | 1       | 0.2308   | 0.0523  | 0.14805      | 0.36         |
| 28                              | 15     | 1       | 0.2154   | 0.051   | 0.13543      | 0.343        |
| 29                              | 14     | 1       | 0.2      | 0.0496  | 0.12299      | 0.325        |
| 57                              | 13     | 1       | 0.1846   | 0.0481  | 0.11076      | 0.308        |
| 58                              | 12     | 1       | 0.1692   | 0.0465  | 0.09875      | 0.29         |

|    |    |   |        |        |         |       |
|----|----|---|--------|--------|---------|-------|
| 59 | 11 | 1 | 0.1538 | 0.0448 | 0.08699 | 0.272 |
| 85 | 10 | 1 | 0.1385 | 0.0428 | 0.0755  | 0.254 |
| 86 | 9  | 1 | 0.1231 | 0.0407 | 0.06432 | 0.236 |
| 87 | 8  | 1 | 0.1077 | 0.0384 | 0.05349 | 0.217 |
| 88 | 7  | 1 | 0.0923 | 0.0359 | 0.04307 | 0.198 |
| 89 | 6  | 1 | 0.0769 | 0.0331 | 0.03314 | 0.179 |
| 90 | 5  | 1 | 0.0615 | 0.0298 | 0.02381 | 0.159 |
| 91 | 4  | 1 | 0.0462 | 0.026  | 0.01528 | 0.139 |
| 92 | 3  | 1 | 0.0308 | 0.0214 | 0.00786 | 0.12  |
| 93 | 2  | 1 | 0.0154 | 0.0153 | 0.0022  | 0.108 |
| 96 | 1  | 1 | 0      | NaN    | NA      | NA    |

**Table S205.** Ulubey station Kaplan-Meier drought risk estimates according to SPI-3, 6, and 12

| Drought Risk (SPI3) |              | Drought Risk (SPI6) |              | Drought Risk (SPI12) |              |
|---------------------|--------------|---------------------|--------------|----------------------|--------------|
| Time                | Drought Risk | Time                | Drought Risk | Time                 | Drought Risk |
| 1                   | 0.1304       | 1                   | 0.0455       | 1                    | 0.0769       |
| 2                   | 0.2029       | 2                   | 0.1061       | 2                    | 0.2          |
| 3                   | 0.3043       | 3                   | 0.1818       | 3                    | 0.2923       |
| 4                   | 0.3768       | 4                   | 0.197        | 4                    | 0.4          |
| 5                   | 0.4493       | 5                   | 0.2121       | 5                    | 0.4769       |
| 6                   | 0.5362       | 6                   | 0.2727       | 6                    | 0.5385       |
| 7                   | 0.6232       | 7                   | 0.3636       | 7                    | 0.5692       |
| 8                   | 0.6377       | 8                   | 0.4242       | 8                    | 0.5846       |
| 9                   | 0.6667       | 9                   | 0.4848       | 9                    | 0.6          |
| 10                  | 0.6957       | 10                  | 0.5455       | 10                   | 0.6154       |
| 12                  | 0.7053       | 11                  | 0.5758       | 11                   | 0.6308       |
| 13                  | 0.7101       | 12                  | 0.5909       | 12                   | 0.6462       |
| 14                  | 0.7391       | 13                  | 0.6061       | 13                   | 0.6769       |
| 15                  | 0.7681       | 14                  | 0.6212       | 14                   | 0.6923       |
| 18                  | 0.7971       | 15                  | 0.6515       | 15                   | 0.7077       |
| 20                  | 0.8116       | 16                  | 0.6667       | 16                   | 0.7231       |
| 21                  | 0.8406       | 17                  | 0.6818       | 17                   | 0.7385       |
| 22                  | 0.8841       | 18                  | 0.7121       | 26                   | 0.7538       |
| 23                  | 0.913        | 19                  | 0.7273       | 27                   | 0.7692       |
| 26                  | 0.942        | 20                  | 0.7424       | 28                   | 0.7846       |
| 27                  | 0.9565       | 23                  | 0.7576       | 29                   | 0.8          |
| 28                  | 0.971        | 24                  | 0.7727       | 57                   | 0.8154       |
| 40                  | 0.9855       | 25                  | 0.7879       | 58                   | 0.8308       |
| 41                  | 1            | 31                  | 0.803        | 59                   | 0.8462       |

|  |  |    |        |    |        |
|--|--|----|--------|----|--------|
|  |  | 32 | 0.8182 | 85 | 0.8615 |
|  |  | 33 | 0.8333 | 86 | 0.8769 |
|  |  | 35 | 0.8485 | 87 | 0.8923 |
|  |  | 36 | 0.8636 | 88 | 0.9077 |
|  |  | 37 | 0.8788 | 89 | 0.9231 |
|  |  | 38 | 0.8939 | 90 | 0.9385 |
|  |  | 39 | 0.9091 | 91 | 0.9538 |
|  |  | 40 | 0.9242 | 92 | 0.9692 |
|  |  | 41 | 0.9394 | 93 | 0.9846 |
|  |  | 42 | 0.9545 | 96 | 1      |
|  |  | 43 | 0.9697 |    |        |
|  |  | 50 | 0.9848 |    |        |
|  |  | 56 | 1      |    |        |

**Table S206.** Ulubey station Kaplan-Meier survival estimates according to SPEI-3

| Kaplan-Meier Wet to Dry (SPEI3) |        |         |          |         |              |              |
|---------------------------------|--------|---------|----------|---------|--------------|--------------|
|                                 |        | n       | events   | median  | 0.95LCL      | 0.95UCL      |
|                                 |        | 77      | 77       | 8       | 7            | 10           |
| time                            | n.risk | n.event | survival | std.err | lower 95% CI | upper 95% CI |
| 1                               | 77     | 7       | 0.9091   | 0.0328  | 0.8471       | 0.976        |
| 2                               | 70     | 4       | 0.8571   | 0.0399  | 0.78244      | 0.939        |
| 3                               | 66     | 7       | 0.7662   | 0.0482  | 0.6773       | 0.867        |
| 4                               | 59     | 1       | 0.7532   | 0.0491  | 0.66285      | 0.856        |
| 5                               | 58     | 5       | 0.6883   | 0.0528  | 0.59226      | 0.8          |
| 6                               | 53     | 2       | 0.6623   | 0.0539  | 0.5647       | 0.777        |
| 7                               | 51     | 6       | 0.5844   | 0.0562  | 0.48408      | 0.706        |
| 8                               | 45     | 8       | 0.4805   | 0.0569  | 0.38094      | 0.606        |
| 9                               | 37     | 7       | 0.3896   | 0.0556  | 0.29459      | 0.515        |
| 10                              | 30     | 6       | 0.3117   | 0.0528  | 0.22365      | 0.434        |
| 11                              | 24     | 3       | 0.2727   | 0.0508  | 0.18938      | 0.393        |
| 12                              | 21     | 1       | 0.2597   | 0.05    | 0.17815      | 0.379        |
| 13                              | 20     | 2       | 0.2338   | 0.0482  | 0.15601      | 0.35         |
| 14                              | 18     | 3       | 0.1948   | 0.0451  | 0.1237       | 0.307        |
| 15                              | 15     | 3       | 0.1558   | 0.0413  | 0.09267      | 0.262        |
| 16                              | 12     | 2       | 0.1299   | 0.0383  | 0.07285      | 0.232        |
| 17                              | 10     | 1       | 0.1169   | 0.0366  | 0.06326      | 0.216        |
| 18                              | 9      | 1       | 0.1039   | 0.0348  | 0.05392      | 0.2          |
| 19                              | 8      | 1       | 0.0909   | 0.0328  | 0.04486      | 0.184        |
| 20                              | 7      | 1       | 0.0779   | 0.0305  | 0.03614      | 0.168        |



|    |   |   |        |        |         |       |
|----|---|---|--------|--------|---------|-------|
| 28 | 6 | 1 | 0.0649 | 0.0281 | 0.02782 | 0.152 |
| 35 | 5 | 1 | 0.0519 | 0.0253 | 0.02001 | 0.135 |
| 39 | 4 | 1 | 0.039  | 0.0221 | 0.01285 | 0.118 |
| 40 | 3 | 1 | 0.026  | 0.0181 | 0.00661 | 0.102 |
| 48 | 2 | 1 | 0.013  | 0.0129 | 0.00185 | 0.091 |
| 49 | 1 | 1 | 0      | NaN    | NA      | NA    |

**Table S207.** Ulubey station Kaplan-Meier survival estimates according to SPEI-6

| Kaplan-Meier Wet to Dry (SPEI6) |        |         |          |         |              |              |
|---------------------------------|--------|---------|----------|---------|--------------|--------------|
|                                 |        | n       | events   | median  | 0.95LCL      | 0.95UCL      |
|                                 |        | 80      | 80       | 9       | 7            | 11           |
| time                            | n.risk | n.event | survival | std.err | lower 95% CI | upper 95% CI |
| 1                               | 80     | 3       | 0.9625   | 0.0212  | 0.92176      | 10.000       |
| 2                               | 77     | 5       | 0.9      | 0.0335  | 0.8366       | 0.9682       |
| 3                               | 72     | 4       | 0.85     | 0.0399  | 0.77525      | 0.932        |
| 4                               | 68     | 3       | 0.8125   | 0.0436  | 0.73132      | 0.9027       |
| 5                               | 65     | 3       | 0.775    | 0.0467  | 0.68869      | 0.8721       |
| 6                               | 62     | 7       | 0.6875   | 0.0518  | 0.59308      | 0.797        |
| 7                               | 55     | 8       | 0.5875   | 0.055   | 0.48895      | 0.7059       |
| 8                               | 47     | 6       | 0.5125   | 0.0559  | 0.41388      | 0.6346       |
| 9                               | 41     | 4       | 0.4625   | 0.0557  | 0.36519      | 0.5857       |
| 10                              | 37     | 4       | 0.4125   | 0.055   | 0.31758      | 0.5358       |
| 11                              | 33     | 3       | 0.375    | 0.0541  | 0.2826       | 0.4976       |
| 12                              | 30     | 1       | 0.3625   | 0.0537  | 0.27108      | 0.4847       |
| 13                              | 29     | 1       | 0.35     | 0.0533  | 0.25964      | 0.4718       |
| 14                              | 28     | 1       | 0.3375   | 0.0529  | 0.24828      | 0.4588       |
| 15                              | 27     | 2       | 0.3125   | 0.0518  | 0.22578      | 0.4325       |
| 16                              | 25     | 2       | 0.2875   | 0.0506  | 0.20362      | 0.4059       |
| 17                              | 23     | 4       | 0.2375   | 0.0476  | 0.16038      | 0.3517       |
| 18                              | 19     | 1       | 0.225    | 0.0467  | 0.14982      | 0.3379       |
| 19                              | 18     | 2       | 0.2      | 0.0447  | 0.12903      | 0.31         |
| 22                              | 16     | 1       | 0.1875   | 0.0436  | 0.11882      | 0.2959       |
| 23                              | 15     | 1       | 0.175    | 0.0425  | 0.10874      | 0.2816       |
| 24                              | 14     | 1       | 0.1625   | 0.0412  | 0.09881      | 0.2672       |
| 28                              | 13     | 1       | 0.15     | 0.0399  | 0.08903      | 0.2527       |
| 46                              | 12     | 1       | 0.1375   | 0.0385  | 0.07942      | 0.238        |
| 47                              | 11     | 1       | 0.125    | 0.037   | 0.07         | 0.2232       |
| 48                              | 10     | 1       | 0.1125   | 0.0353  | 0.06079      | 0.2082       |
| 49                              | 9      | 1       | 0.1      | 0.0335  | 0.05182      | 0.193        |
| 50                              | 8      | 1       | 0.0875   | 0.0316  | 0.04312      | 0.1776       |
| 51                              | 7      | 1       | 0.075    | 0.0294  | 0.03474      | 0.1619       |
| 52                              | 6      | 1       | 0.0625   | 0.0271  | 0.02675      | 0.146        |
| 53                              | 5      | 1       | 0.05     | 0.0244  | 0.01924      | 0.13         |

|    |   |   |        |        |         |        |
|----|---|---|--------|--------|---------|--------|
| 54 | 4 | 1 | 0.0375 | 0.0212 | 0.01236 | 0.1138 |
| 55 | 3 | 1 | 0.025  | 0.0175 | 0.00636 | 0.0982 |
| 74 | 2 | 1 | 0.0125 | 0.0124 | 0.00178 | 0.0877 |
| 75 | 1 | 1 | 0      | NaN    | NA      | NA     |

**Table S208.** Ulubey station Kaplan-Meier survival estimates according to SPEI-12

| Kaplan-Meier Wet to Dry (SPEI12) |        |         |          |         |              |              |
|----------------------------------|--------|---------|----------|---------|--------------|--------------|
|                                  |        | n       | events   | median  | 0.95LCL      | 0.95UCL      |
|                                  |        | 86      | 86       | 7.5     | 6            | 11           |
| time                             | n.risk | n.event | survival | std.err | lower 95% CI | upper 95% CI |
| 1                                | 86     | 5       | 0.9419   | 0.0252  | 0.89368      | 0.9926       |
| 2                                | 81     | 7       | 0.8605   | 0.0374  | 0.79026      | 0.9369       |
| 3                                | 74     | 9       | 0.7558   | 0.0463  | 0.67026      | 0.8523       |
| 4                                | 65     | 6       | 0.686    | 0.05    | 0.59465      | 0.7915       |
| 5                                | 59     | 6       | 0.6163   | 0.0524  | 0.52162      | 0.7281       |
| 6                                | 53     | 5       | 0.5581   | 0.0536  | 0.46246      | 0.6736       |
| 7                                | 48     | 5       | 0.5      | 0.0539  | 0.40475      | 0.6177       |
| 8                                | 43     | 3       | 0.4651   | 0.0538  | 0.37079      | 0.5834       |
| 9                                | 40     | 3       | 0.4302   | 0.0534  | 0.33735      | 0.5487       |
| 10                               | 37     | 3       | 0.3953   | 0.0527  | 0.30442      | 0.5134       |
| 11                               | 34     | 3       | 0.3605   | 0.0518  | 0.27202      | 0.4777       |
| 12                               | 31     | 4       | 0.314    | 0.05    | 0.22971      | 0.4291       |
| 13                               | 27     | 2       | 0.2907   | 0.049   | 0.20896      | 0.4044       |
| 14                               | 25     | 3       | 0.2558   | 0.047   | 0.17839      | 0.3668       |
| 15                               | 22     | 2       | 0.2326   | 0.0456  | 0.15841      | 0.3414       |
| 16                               | 20     | 1       | 0.2209   | 0.0447  | 0.14856      | 0.3286       |
| 17                               | 19     | 1       | 0.2093   | 0.0439  | 0.13879      | 0.3156       |
| 18                               | 18     | 1       | 0.1977   | 0.0429  | 0.12913      | 0.3026       |
| 19                               | 17     | 1       | 0.186    | 0.042   | 0.11957      | 0.2895       |
| 25                               | 16     | 1       | 0.1744   | 0.0409  | 0.11013      | 0.2762       |
| 26                               | 15     | 1       | 0.1628   | 0.0398  | 0.1008       | 0.2629       |
| 27                               | 14     | 1       | 0.1512   | 0.0386  | 0.09161      | 0.2494       |
| 28                               | 13     | 1       | 0.1395   | 0.0374  | 0.08256      | 0.2358       |
| 29                               | 12     | 1       | 0.1279   | 0.036   | 0.07366      | 0.2221       |
| 71                               | 11     | 1       | 0.1163   | 0.0346  | 0.06493      | 0.2082       |
| 72                               | 10     | 1       | 0.1047   | 0.033   | 0.0564       | 0.1942       |
| 150                              | 9      | 1       | 0.093    | 0.0313  | 0.04808      | 0.18         |
| 151                              | 8      | 1       | 0.0814   | 0.0295  | 0.04002      | 0.1656       |
| 152                              | 7      | 1       | 0.0698   | 0.0275  | 0.03225      | 0.1509       |
| 153                              | 6      | 1       | 0.0581   | 0.0252  | 0.02483      | 0.1361       |
| 154                              | 5      | 1       | 0.0465   | 0.0227  | 0.01786      | 0.1211       |
| 155                              | 4      | 1       | 0.0349   | 0.0198  | 0.01148      | 0.106        |
| 156                              | 3      | 1       | 0.0233   | 0.0163  | 0.00591      | 0.0915       |

|     |   |   |        |        |         |        |
|-----|---|---|--------|--------|---------|--------|
| 157 | 2 | 1 | 0.0116 | 0.0116 | 0.00166 | 0.0816 |
| 158 | 1 | 1 | 0      | NaN    | NA      | NA     |

**Table S209.** Ulubey station Kaplan-Meier drought risk estimates according to SPEI-3, 6, and 12

| Drought Risk (SPEI3) |              | Drought Risk (SPEI6) |              | Drought Risk (SPEI12) |              |
|----------------------|--------------|----------------------|--------------|-----------------------|--------------|
| Time                 | Drought Risk | Time                 | Drought Risk | Time                  | Drought Risk |
| 1                    | 0.0909       | 1                    | 0.0375       | 1                     | 0.0581       |
| 2                    | 0.1429       | 2                    | 0.1          | 2                     | 0.1395       |
| 3                    | 0.2338       | 3                    | 0.15         | 3                     | 0.2442       |
| 4                    | 0.2468       | 4                    | 0.1875       | 4                     | 0.314        |
| 5                    | 0.3117       | 5                    | 0.225        | 5                     | 0.3837       |
| 6                    | 0.3377       | 6                    | 0.3125       | 6                     | 0.4419       |
| 7                    | 0.4156       | 7                    | 0.4125       | 7                     | 0.5          |
| 8                    | 0.5195       | 8                    | 0.4875       | 8                     | 0.5349       |
| 9                    | 0.6104       | 9                    | 0.5375       | 9                     | 0.5698       |
| 10                   | 0.6883       | 10                   | 0.5875       | 10                    | 0.6047       |
| 11                   | 0.7273       | 11                   | 0.625        | 11                    | 0.6395       |
| 12                   | 0.7403       | 12                   | 0.6375       | 12                    | 0.686        |
| 13                   | 0.7662       | 13                   | 0.65         | 13                    | 0.7093       |
| 14                   | 0.8052       | 14                   | 0.6625       | 14                    | 0.7442       |
| 15                   | 0.8442       | 15                   | 0.6875       | 15                    | 0.7674       |
| 16                   | 0.8701       | 16                   | 0.7125       | 16                    | 0.7791       |
| 17                   | 0.8831       | 17                   | 0.7625       | 17                    | 0.7907       |
| 18                   | 0.8961       | 18                   | 0.775        | 18                    | 0.8023       |
| 19                   | 0.9091       | 19                   | 0.8          | 19                    | 0.814        |
| 20                   | 0.9221       | 22                   | 0.8125       | 25                    | 0.8256       |
| 28                   | 0.9351       | 23                   | 0.825        | 26                    | 0.8372       |
| 35                   | 0.9481       | 24                   | 0.8375       | 27                    | 0.8488       |
| 39                   | 0.961        | 28                   | 0.85         | 28                    | 0.8605       |
| 40                   | 0.974        | 46                   | 0.8625       | 29                    | 0.8721       |
| 48                   | 0.987        | 47                   | 0.875        | 71                    | 0.8837       |
| 49                   | 1            | 48                   | 0.8875       | 72                    | 0.8953       |
|                      |              | 49                   | 0.9          | 150                   | 0.907        |
|                      |              | 50                   | 0.9125       | 151                   | 0.9186       |
|                      |              | 51                   | 0.925        | 152                   | 0.9302       |
|                      |              | 52                   | 0.9375       | 153                   | 0.9419       |
|                      |              | 53                   | 0.95         | 154                   | 0.9535       |
|                      |              | 54                   | 0.9625       | 155                   | 0.9651       |
|                      |              | 55                   | 0.975        | 156                   | 0.9767       |
|                      |              | 74                   | 0.9875       | 157                   | 0.9884       |
|                      |              | 75                   | 1            | 158                   | 1            |

**Table S210.** Usak station Kaplan-Meier survival estimates according to SPI-3

| Kaplan-Meier Wet to Dry (SPI3) |        |         |          |         |              |              |
|--------------------------------|--------|---------|----------|---------|--------------|--------------|
|                                |        | n       | events   | median  | 0.95LCL      | 0.95UCL      |
|                                |        | 157     | 157      | 8       | 7            | 9            |
| time                           | n.risk | n.event | survival | std.err | lower 95% CL | upper 95% CL |
| 0                              | 157    | 1       | 0.99363  | 0.00635 | 0.981264     | 1            |
| 1                              | 156    | 12      | 0.9172   | 0.02199 | 0.875087     | 0.9613       |
| 2                              | 144    | 3       | 0.89809  | 0.02414 | 0.851992     | 0.9467       |
| 3                              | 141    | 8       | 0.84713  | 0.02872 | 0.792673     | 0.9053       |
| 4                              | 133    | 13      | 0.76433  | 0.03387 | 0.700745     | 0.8337       |
| 5                              | 120    | 12      | 0.6879   | 0.03698 | 0.619107     | 0.7643       |
| 6                              | 108    | 12      | 0.61146  | 0.0389  | 0.539784     | 0.6927       |
| 7                              | 96     | 15      | 0.51592  | 0.03988 | 0.443386     | 0.6003       |
| 8                              | 81     | 11      | 0.44586  | 0.03967 | 0.37451      | 0.5308       |
| 9                              | 70     | 10      | 0.38217  | 0.03878 | 0.313239     | 0.4663       |
| 10                             | 60     | 5       | 0.35032  | 0.03807 | 0.283107     | 0.4335       |
| 11                             | 55     | 4       | 0.32484  | 0.03738 | 0.259258     | 0.407        |
| 12                             | 51     | 2       | 0.3121   | 0.03698 | 0.247424     | 0.3937       |
| 13                             | 49     | 6       | 0.27389  | 0.03559 | 0.212304     | 0.3533       |
| 14                             | 43     | 5       | 0.24204  | 0.03418 | 0.183513     | 0.3192       |
| 15                             | 38     | 5       | 0.21019  | 0.03252 | 0.155213     | 0.2846       |
| 16                             | 33     | 4       | 0.18471  | 0.03097 | 0.132977     | 0.2566       |
| 17                             | 29     | 6       | 0.1465   | 0.02822 | 0.100428     | 0.2137       |
| 18                             | 23     | 4       | 0.12102  | 0.02603 | 0.079391     | 0.1845       |
| 19                             | 19     | 1       | 0.11465  | 0.02543 | 0.074232     | 0.1771       |
| 20                             | 18     | 3       | 0.09554  | 0.02346 | 0.059044     | 0.1546       |
| 21                             | 15     | 2       | 0.0828   | 0.02199 | 0.049198     | 0.1394       |
| 22                             | 13     | 3       | 0.06369  | 0.01949 | 0.034966     | 0.116        |
| 23                             | 10     | 1       | 0.05732  | 0.01855 | 0.030399     | 0.1081       |
| 25                             | 9      | 1       | 0.05096  | 0.01755 | 0.025943     | 0.1001       |
| 26                             | 8      | 1       | 0.04459  | 0.01647 | 0.021614     | 0.092        |
| 29                             | 7      | 1       | 0.03822  | 0.0153  | 0.017436     | 0.0838       |
| 32                             | 6      | 1       | 0.03185  | 0.01401 | 0.013443     | 0.0754       |
| 33                             | 5      | 2       | 0.01911  | 0.01093 | 0.00623      | 0.0586       |
| 37                             | 3      | 1       | 0.01274  | 0.00895 | 0.003214     | 0.0505       |
| 41                             | 2      | 1       | 0.00637  | 0.00635 | 0.000903     | 0.0449       |
| 48                             | 1      | 1       | 0        | NaN     | NA           | NA           |

**Table S211.** Usak station Kaplan-Meier survival estimates according to SPI-6

| Kaplan-Meier Wet to Dry (SPI6) |        |         |          |         |              |              |
|--------------------------------|--------|---------|----------|---------|--------------|--------------|
|                                |        | n       | events   | median  | 0.95LCL      | 0.95UCL      |
|                                |        | 152     | 152      | 15      | 13           | 18           |
| time                           | n.risk | n.event | survival | std.err | lower 95% CL | upper 95% CL |
| 1                              | 152    | 5       | 0.96711  | 0.01447 | 0.939162     | 0.9959       |
| 2                              | 147    | 8       | 0.91447  | 0.02268 | 0.871078     | 0.96         |

|    |     |   |         |         |          |        |
|----|-----|---|---------|---------|----------|--------|
| 3  | 139 | 6 | 0.875   | 0.02682 | 0.823973 | 0.9292 |
| 4  | 133 | 2 | 0.86184 | 0.02799 | 0.808695 | 0.9185 |
| 5  | 131 | 1 | 0.85526 | 0.02854 | 0.80112  | 0.9131 |
| 6  | 130 | 3 | 0.83553 | 0.03007 | 0.778624 | 0.8966 |
| 7  | 127 | 6 | 0.79605 | 0.03268 | 0.734507 | 0.8628 |
| 8  | 121 | 8 | 0.74342 | 0.03542 | 0.677134 | 0.8162 |
| 9  | 113 | 7 | 0.69737 | 0.03726 | 0.62803  | 0.7744 |
| 10 | 106 | 7 | 0.65132 | 0.03865 | 0.579796 | 0.7317 |
| 11 | 99  | 7 | 0.60526 | 0.03965 | 0.532339 | 0.6882 |
| 12 | 92  | 4 | 0.57895 | 0.04005 | 0.505545 | 0.663  |
| 13 | 88  | 4 | 0.55263 | 0.04033 | 0.478979 | 0.6376 |
| 14 | 84  | 5 | 0.51974 | 0.04052 | 0.446083 | 0.6056 |
| 15 | 79  | 5 | 0.48684 | 0.04054 | 0.413528 | 0.5732 |
| 16 | 74  | 5 | 0.45395 | 0.04038 | 0.381314 | 0.5404 |
| 17 | 69  | 6 | 0.41447 | 0.03996 | 0.343112 | 0.5007 |
| 18 | 63  | 5 | 0.38158 | 0.0394  | 0.311667 | 0.4672 |
| 19 | 58  | 2 | 0.36842 | 0.03913 | 0.299191 | 0.4537 |
| 20 | 56  | 4 | 0.34211 | 0.03848 | 0.27442  | 0.4265 |
| 21 | 52  | 5 | 0.30921 | 0.03749 | 0.243815 | 0.3921 |
| 22 | 47  | 6 | 0.26974 | 0.036   | 0.207654 | 0.3504 |
| 23 | 41  | 2 | 0.25658 | 0.03542 | 0.195749 | 0.3363 |
| 24 | 39  | 3 | 0.23684 | 0.03448 | 0.178043 | 0.3151 |
| 25 | 36  | 3 | 0.21711 | 0.03344 | 0.160533 | 0.2936 |
| 26 | 33  | 3 | 0.19737 | 0.03228 | 0.143235 | 0.272  |
| 27 | 30  | 2 | 0.18421 | 0.03144 | 0.131832 | 0.2574 |
| 28 | 28  | 2 | 0.17105 | 0.03054 | 0.120543 | 0.2427 |
| 29 | 26  | 1 | 0.16447 | 0.03007 | 0.114944 | 0.2353 |
| 30 | 25  | 1 | 0.15789 | 0.02958 | 0.109376 | 0.2279 |
| 31 | 24  | 1 | 0.15132 | 0.02907 | 0.103843 | 0.2205 |
| 32 | 23  | 1 | 0.14474 | 0.02854 | 0.098344 | 0.213  |
| 33 | 22  | 1 | 0.13816 | 0.02799 | 0.092883 | 0.2055 |
| 34 | 21  | 1 | 0.13158 | 0.02742 | 0.087461 | 0.198  |
| 36 | 20  | 1 | 0.125   | 0.02682 | 0.082081 | 0.1904 |
| 37 | 19  | 1 | 0.11842 | 0.02621 | 0.076745 | 0.1827 |
| 38 | 18  | 2 | 0.10526 | 0.02489 | 0.06622  | 0.1673 |
| 39 | 16  | 2 | 0.09211 | 0.02346 | 0.055914 | 0.1517 |
| 40 | 14  | 1 | 0.08553 | 0.02268 | 0.050856 | 0.1438 |
| 41 | 13  | 2 | 0.07237 | 0.02102 | 0.04096  | 0.1279 |
| 42 | 11  | 2 | 0.05921 | 0.01914 | 0.031419 | 0.1116 |
| 43 | 9   | 1 | 0.05263 | 0.01811 | 0.026812 | 0.1033 |
| 44 | 8   | 1 | 0.04605 | 0.017   | 0.022337 | 0.0949 |
| 45 | 7   | 1 | 0.03947 | 0.01579 | 0.018019 | 0.0865 |
| 46 | 6   | 1 | 0.03289 | 0.01447 | 0.013892 | 0.0779 |
| 47 | 5   | 1 | 0.02632 | 0.01298 | 0.010006 | 0.0692 |
| 48 | 4   | 1 | 0.01974 | 0.01128 | 0.006437 | 0.0605 |

|    |   |   |         |         |          |        |
|----|---|---|---------|---------|----------|--------|
| 49 | 3 | 1 | 0.01316 | 0.00924 | 0.003321 | 0.0521 |
| 50 | 2 | 1 | 0.00658 | 0.00656 | 0.000933 | 0.0464 |
| 57 | 1 | 1 | 0       | NaN     | NA       | NA     |

**Table S212.** Usak station Kaplan-Meier survival estimates according to SPI-12

| Kaplan-Meier Wet to Dry (SPI12) |        |         |          |         |              |              |
|---------------------------------|--------|---------|----------|---------|--------------|--------------|
|                                 |        | n       | events   | median  | 0.95LCL      | 0.95UCL      |
|                                 |        | 174     | 174      | 20      | 18           | 22           |
| time                            | n.risk | n.event | survival | std.err | lower 95% CL | upper 95% CL |
| 0                               | 174    | 1       | 0.99425  | 0.00573 | 0.983084     | 1            |
| 1                               | 173    | 9       | 0.94253  | 0.01764 | 0.908574     | 0.9778       |
| 2                               | 164    | 8       | 0.89655  | 0.02309 | 0.852424     | 0.943        |
| 3                               | 156    | 9       | 0.84483  | 0.02745 | 0.792707     | 0.9004       |
| 4                               | 147    | 7       | 0.8046   | 0.03006 | 0.747788     | 0.8657       |
| 5                               | 140    | 7       | 0.76437  | 0.03217 | 0.703841     | 0.8301       |
| 6                               | 133    | 4       | 0.74138  | 0.0332  | 0.679091     | 0.8094       |
| 7                               | 129    | 4       | 0.71839  | 0.0341  | 0.654574     | 0.7884       |
| 8                               | 125    | 1       | 0.71264  | 0.03431 | 0.648479     | 0.7832       |
| 9                               | 124    | 2       | 0.70115  | 0.0347  | 0.636329     | 0.7726       |
| 10                              | 122    | 1       | 0.6954   | 0.03489 | 0.630273     | 0.7673       |
| 11                              | 121    | 2       | 0.68391  | 0.03525 | 0.618198     | 0.7566       |
| 12                              | 119    | 3       | 0.66667  | 0.03574 | 0.600177     | 0.7405       |
| 13                              | 116    | 3       | 0.64943  | 0.03617 | 0.582261     | 0.7243       |
| 14                              | 113    | 2       | 0.63793  | 0.03643 | 0.570373     | 0.7135       |
| 15                              | 111    | 2       | 0.62644  | 0.03667 | 0.558529     | 0.7026       |
| 16                              | 109    | 3       | 0.6092   | 0.03699 | 0.540844     | 0.6862       |
| 17                              | 106    | 5       | 0.58046  | 0.03741 | 0.511578     | 0.6586       |
| 18                              | 101    | 5       | 0.55172  | 0.0377  | 0.482565     | 0.6308       |
| 19                              | 96     | 6       | 0.51724  | 0.03788 | 0.448076     | 0.5971       |
| 20                              | 90     | 7       | 0.47701  | 0.03786 | 0.408283     | 0.5573       |
| 21                              | 83     | 8       | 0.43103  | 0.03754 | 0.36339      | 0.5113       |
| 22                              | 75     | 5       | 0.4023   | 0.03717 | 0.335656     | 0.4822       |
| 23                              | 70     | 4       | 0.37931  | 0.03678 | 0.313652     | 0.4587       |
| 24                              | 66     | 3       | 0.36207  | 0.03643 | 0.29726      | 0.441        |
| 25                              | 63     | 5       | 0.33333  | 0.03574 | 0.27016      | 0.4113       |
| 26                              | 58     | 5       | 0.3046   | 0.03489 | 0.243346     | 0.3813       |
| 27                              | 53     | 7       | 0.26437  | 0.03343 | 0.206332     | 0.3387       |
| 28                              | 46     | 4       | 0.24138  | 0.03244 | 0.185482     | 0.3141       |
| 29                              | 42     | 3       | 0.22414  | 0.03161 | 0.170003     | 0.2955       |
| 30                              | 39     | 1       | 0.21839  | 0.03132 | 0.164876     | 0.2893       |
| 31                              | 38     | 2       | 0.2069   | 0.03071 | 0.154672     | 0.2768       |
| 32                              | 36     | 1       | 0.20115  | 0.03039 | 0.149597     | 0.2705       |
| 33                              | 35     | 2       | 0.18966  | 0.02972 | 0.139501     | 0.2578       |
| 34                              | 33     | 1       | 0.18391  | 0.02937 | 0.134483     | 0.2515       |

|     |    |   |         |         |          |        |
|-----|----|---|---------|---------|----------|--------|
| 35  | 32 | 1 | 0.17816 | 0.02901 | 0.129485 | 0.2451 |
| 41  | 31 | 1 | 0.17241 | 0.02864 | 0.124507 | 0.2388 |
| 42  | 30 | 1 | 0.16667 | 0.02825 | 0.119552 | 0.2323 |
| 43  | 29 | 1 | 0.16092 | 0.02786 | 0.114619 | 0.2259 |
| 44  | 28 | 1 | 0.15517 | 0.02745 | 0.10971  | 0.2195 |
| 47  | 27 | 1 | 0.14943 | 0.02703 | 0.104825 | 0.213  |
| 48  | 26 | 1 | 0.14368 | 0.02659 | 0.099966 | 0.2065 |
| 49  | 25 | 1 | 0.13793 | 0.02614 | 0.095135 | 0.2    |
| 50  | 24 | 1 | 0.13218 | 0.02568 | 0.090331 | 0.1934 |
| 51  | 23 | 1 | 0.12644 | 0.02519 | 0.085557 | 0.1868 |
| 52  | 22 | 1 | 0.12069 | 0.0247  | 0.080815 | 0.1802 |
| 53  | 21 | 1 | 0.11494 | 0.02418 | 0.076106 | 0.1736 |
| 54  | 20 | 1 | 0.1092  | 0.02364 | 0.071432 | 0.1669 |
| 58  | 19 | 1 | 0.10345 | 0.02309 | 0.066797 | 0.1602 |
| 59  | 18 | 2 | 0.09195 | 0.02191 | 0.057649 | 0.1467 |
| 60  | 16 | 1 | 0.08621 | 0.02128 | 0.053143 | 0.1398 |
| 61  | 15 | 1 | 0.08046 | 0.02062 | 0.048689 | 0.133  |
| 73  | 14 | 1 | 0.07471 | 0.01993 | 0.04429  | 0.126  |
| 74  | 13 | 1 | 0.06897 | 0.01921 | 0.039952 | 0.119  |
| 90  | 12 | 1 | 0.06322 | 0.01845 | 0.035681 | 0.112  |
| 91  | 11 | 1 | 0.05747 | 0.01764 | 0.031487 | 0.1049 |
| 92  | 10 | 1 | 0.05172 | 0.01679 | 0.027378 | 0.0977 |
| 93  | 9  | 1 | 0.04598 | 0.01588 | 0.023367 | 0.0905 |
| 94  | 8  | 1 | 0.04023 | 0.0149  | 0.01947  | 0.0831 |
| 95  | 7  | 1 | 0.03448 | 0.01383 | 0.015709 | 0.0757 |
| 96  | 6  | 1 | 0.02874 | 0.01266 | 0.012113 | 0.0682 |
| 97  | 5  | 1 | 0.02299 | 0.01136 | 0.008726 | 0.0606 |
| 98  | 4  | 1 | 0.01724 | 0.00987 | 0.005615 | 0.0529 |
| 99  | 3  | 1 | 0.01149 | 0.00808 | 0.002898 | 0.0456 |
| 100 | 2  | 1 | 0.00575 | 0.00573 | 0.000814 | 0.0406 |
| 101 | 1  | 1 | 0       | NaN     | NA       | NA     |

**Table S213.** Usak station Kaplan-Meier drought risk estimates according to SPI-3, 6, and 12

| Drought Risk (SPI3) |              | Drought Risk (SPI6) |              | Drought Risk (SPI12) |              |
|---------------------|--------------|---------------------|--------------|----------------------|--------------|
| Time                | Drought Risk | Time                | Drought Risk | Time                 | Drought Risk |
| 0                   | 0.00637      | 1                   | 0.03289      | 0                    | 0.00575      |
| 1                   | 0.0828       | 2                   | 0.08553      | 1                    | 0.05747      |
| 2                   | 0.10191      | 3                   | 0.125        | 2                    | 0.10345      |
| 3                   | 0.15287      | 4                   | 0.13816      | 3                    | 0.15517      |
| 4                   | 0.23567      | 5                   | 0.14474      | 4                    | 0.1954       |
| 5                   | 0.3121       | 6                   | 0.16447      | 5                    | 0.23563      |
| 6                   | 0.38854      | 7                   | 0.20395      | 6                    | 0.25862      |
| 7                   | 0.48408      | 8                   | 0.25658      | 7                    | 0.28161      |
| 8                   | 0.55414      | 9                   | 0.30263      | 8                    | 0.28736      |

|    |         |    |         |    |         |
|----|---------|----|---------|----|---------|
| 9  | 0.61783 | 10 | 0.34868 | 9  | 0.29885 |
| 10 | 0.64968 | 11 | 0.39474 | 10 | 0.3046  |
| 11 | 0.67516 | 12 | 0.42105 | 11 | 0.31609 |
| 12 | 0.6879  | 13 | 0.44737 | 12 | 0.33333 |
| 13 | 0.72611 | 14 | 0.48026 | 13 | 0.35057 |
| 14 | 0.75796 | 15 | 0.51316 | 14 | 0.36207 |
| 15 | 0.78981 | 16 | 0.54605 | 15 | 0.37356 |
| 16 | 0.81529 | 17 | 0.58553 | 16 | 0.3908  |
| 17 | 0.8535  | 18 | 0.61842 | 17 | 0.41954 |
| 18 | 0.87898 | 19 | 0.63158 | 18 | 0.44828 |
| 19 | 0.88535 | 20 | 0.65789 | 19 | 0.48276 |
| 20 | 0.90446 | 21 | 0.69079 | 20 | 0.52299 |
| 21 | 0.9172  | 22 | 0.73026 | 21 | 0.56897 |
| 22 | 0.93631 | 23 | 0.74342 | 22 | 0.5977  |
| 23 | 0.94268 | 24 | 0.76316 | 23 | 0.62069 |
| 25 | 0.94904 | 25 | 0.78289 | 24 | 0.63793 |
| 26 | 0.95541 | 26 | 0.80263 | 25 | 0.66667 |
| 29 | 0.96178 | 27 | 0.81579 | 26 | 0.6954  |
| 32 | 0.96815 | 28 | 0.82895 | 27 | 0.73563 |
| 33 | 0.98089 | 29 | 0.83553 | 28 | 0.75862 |
| 37 | 0.98726 | 30 | 0.84211 | 29 | 0.77586 |
| 41 | 0.99363 | 31 | 0.84868 | 30 | 0.78161 |
| 48 | 1       | 32 | 0.85526 | 31 | 0.7931  |
|    |         | 33 | 0.86184 | 32 | 0.79885 |
|    |         | 34 | 0.86842 | 33 | 0.81034 |
|    |         | 36 | 0.875   | 34 | 0.81609 |
|    |         | 37 | 0.88158 | 35 | 0.82184 |
|    |         | 38 | 0.89474 | 41 | 0.82759 |
|    |         | 39 | 0.90789 | 42 | 0.83333 |
|    |         | 40 | 0.91447 | 43 | 0.83908 |
|    |         | 41 | 0.92763 | 44 | 0.84483 |
|    |         | 42 | 0.94079 | 47 | 0.85057 |
|    |         | 43 | 0.94737 | 48 | 0.85632 |
|    |         | 44 | 0.95395 | 49 | 0.86207 |
|    |         | 45 | 0.96053 | 50 | 0.86782 |
|    |         | 46 | 0.96711 | 51 | 0.87356 |
|    |         | 47 | 0.97368 | 52 | 0.87931 |
|    |         | 48 | 0.98026 | 53 | 0.88506 |
|    |         | 49 | 0.98684 | 54 | 0.8908  |
|    |         | 50 | 0.99342 | 58 | 0.89655 |
|    |         | 57 | 1       | 59 | 0.90805 |
|    |         |    |         | 60 | 0.91379 |
|    |         |    |         | 61 | 0.91954 |
|    |         |    |         | 73 | 0.92529 |
|    |         |    |         | 74 | 0.93103 |



|     |         |
|-----|---------|
| 90  | 0.93678 |
| 91  | 0.94253 |
| 92  | 0.94828 |
| 93  | 0.95402 |
| 94  | 0.95977 |
| 95  | 0.96552 |
| 96  | 0.97126 |
| 97  | 0.97701 |
| 98  | 0.98276 |
| 99  | 0.98851 |
| 100 | 0.99425 |
| 101 | 1       |

**Table S214.** Usak station Kaplan-Meier survival estimates according to SPEI-3

| Kaplan-Meier Wet to Dry (SPEI3) |        |         |          |         |              |              |
|---------------------------------|--------|---------|----------|---------|--------------|--------------|
|                                 |        | n       | events   | median  | 0.95LCL      | 0.95UCL      |
|                                 |        | 102     | 102      | 8       | 6            | 12           |
| time                            | n.risk | n.event | survival | std.err | lower 95% CI | upper 95% CI |
| 1                               | 102    | 8       | 0.9216   | 0.02662 | 0.87084      | 0.9752       |
| 2                               | 94     | 5       | 0.8725   | 0.03302 | 0.81017      | 0.9397       |
| 3                               | 89     | 8       | 0.7941   | 0.04004 | 0.7194       | 0.8766       |
| 4                               | 81     | 6       | 0.7353   | 0.04368 | 0.65447      | 0.8261       |
| 5                               | 75     | 8       | 0.6569   | 0.04701 | 0.5709       | 0.7558       |
| 6                               | 67     | 8       | 0.5784   | 0.04889 | 0.49012      | 0.6827       |
| 7                               | 59     | 6       | 0.5196   | 0.04947 | 0.43116      | 0.6262       |
| 8                               | 53     | 4       | 0.4804   | 0.04947 | 0.39259      | 0.5878       |
| 9                               | 49     | 6       | 0.4216   | 0.04889 | 0.33585      | 0.5292       |
| 10                              | 43     | 1       | 0.4118   | 0.04873 | 0.32652      | 0.5193       |
| 11                              | 42     | 1       | 0.402    | 0.04855 | 0.31723      | 0.5093       |
| 12                              | 41     | 1       | 0.3922   | 0.04834 | 0.30799      | 0.4993       |
| 13                              | 40     | 3       | 0.3627   | 0.04761 | 0.28047      | 0.4691       |
| 14                              | 37     | 5       | 0.3137   | 0.04594 | 0.23545      | 0.418        |
| 15                              | 32     | 4       | 0.2745   | 0.04419 | 0.20024      | 0.3763       |
| 16                              | 28     | 5       | 0.2255   | 0.04138 | 0.15737      | 0.3231       |

|    |    |   |        |         |         |        |
|----|----|---|--------|---------|---------|--------|
| 17 | 23 | 6 | 0.1667 | 0.0369  | 0.10799 | 0.2572 |
| 18 | 17 | 5 | 0.1176 | 0.0319  | 0.06915 | 0.2002 |
| 19 | 12 | 6 | 0.0588 | 0.0233  | 0.02707 | 0.1278 |
| 20 | 6  | 2 | 0.0392 | 0.01922 | 0.01501 | 0.1025 |
| 21 | 4  | 1 | 0.0294 | 0.01673 | 0.00965 | 0.0897 |
| 24 | 3  | 1 | 0.0196 | 0.01373 | 0.00497 | 0.0773 |
| 37 | 2  | 1 | 0.0098 | 0.00976 | 0.00139 | 0.0689 |
| 48 | 1  | 1 | 0      | NaN     | NA      | NA     |

**Table S215.** Usak station Kaplan-Meier survival estimates according to SPEI-6

| Kaplan-Meier Wet to Dry (SPEI6) |        |         |          |         |              |              |
|---------------------------------|--------|---------|----------|---------|--------------|--------------|
|                                 |        | n       | events   | median  | 0.95LCL      | 0.95UCL      |
|                                 |        | 102     | 102      | 10      | 7            | 14           |
| time                            | n.risk | n.event | survival | std.err | lower 95% CI | upper 95% CI |
| 1                               | 102    | 7       | 0.9314   | 0.02503 | 0.88358      | 0.9818       |
| 2                               | 95     | 7       | 0.8627   | 0.03407 | 0.79848      | 0.9322       |
| 3                               | 88     | 6       | 0.8039   | 0.03931 | 0.73045      | 0.8848       |
| 4                               | 82     | 6       | 0.7451   | 0.04315 | 0.66515      | 0.8347       |
| 5                               | 76     | 5       | 0.6961   | 0.04554 | 0.6123       | 0.7913       |
| 6                               | 71     | 4       | 0.6569   | 0.04701 | 0.5709       | 0.7558       |
| 7                               | 67     | 8       | 0.5784   | 0.04889 | 0.49012      | 0.6827       |
| 8                               | 59     | 3       | 0.549    | 0.04927 | 0.46047      | 0.6546       |
| 9                               | 56     | 4       | 0.5098   | 0.0495  | 0.42146      | 0.6167       |
| 10                              | 52     | 3       | 0.4804   | 0.04947 | 0.39259      | 0.5878       |
| 11                              | 49     | 1       | 0.4706   | 0.04942 | 0.38304      | 0.5781       |
| 12                              | 48     | 2       | 0.451    | 0.04927 | 0.36405      | 0.5587       |
| 13                              | 46     | 4       | 0.4118   | 0.04873 | 0.32652      | 0.5193       |
| 14                              | 42     | 5       | 0.3627   | 0.04761 | 0.28047      | 0.4691       |
| 15                              | 37     | 4       | 0.3235   | 0.04632 | 0.24437      | 0.4283       |
| 16                              | 33     | 4       | 0.2843   | 0.04466 | 0.20897      | 0.3868       |
| 17                              | 29     | 4       | 0.2451   | 0.04259 | 0.17435      | 0.3446       |
| 18                              | 25     | 2       | 0.2255   | 0.04138 | 0.15737      | 0.3231       |
| 19                              | 23     | 1       | 0.2157   | 0.04072 | 0.14897      | 0.3123       |
| 20                              | 22     | 1       | 0.2059   | 0.04004 | 0.14064      | 0.3014       |
| 22                              | 21     | 1       | 0.1961   | 0.03931 | 0.13236      | 0.2905       |
| 23                              | 20     | 1       | 0.1863   | 0.03855 | 0.12416      | 0.2795       |
| 24                              | 19     | 1       | 0.1765   | 0.03775 | 0.11604      | 0.2684       |
| 25                              | 18     | 1       | 0.1667   | 0.0369  | 0.10799      | 0.2572       |
| 26                              | 17     | 3       | 0.1373   | 0.03407 | 0.08438      | 0.2233       |
| 27                              | 14     | 1       | 0.1275   | 0.03302 | 0.0767       | 0.2118       |
| 28                              | 13     | 1       | 0.1176   | 0.0319  | 0.06915      | 0.2002       |
| 30                              | 12     | 1       | 0.1078   | 0.03071 | 0.06171      | 0.1885       |
| 39                              | 11     | 1       | 0.098    | 0.02944 | 0.05442      | 0.1766       |

|    |    |   |        |         |         |        |
|----|----|---|--------|---------|---------|--------|
| 40 | 10 | 1 | 0.0882 | 0.02808 | 0.04728 | 0.1647 |
| 41 | 9  | 1 | 0.0784 | 0.02662 | 0.04033 | 0.1525 |
| 42 | 8  | 1 | 0.0686 | 0.02503 | 0.03357 | 0.1403 |
| 43 | 7  | 1 | 0.0588 | 0.0233  | 0.02707 | 0.1278 |
| 44 | 6  | 1 | 0.049  | 0.02138 | 0.02085 | 0.1152 |
| 45 | 5  | 1 | 0.0392 | 0.01922 | 0.01501 | 0.1025 |
| 46 | 4  | 1 | 0.0294 | 0.01673 | 0.00965 | 0.0897 |
| 53 | 3  | 1 | 0.0196 | 0.01373 | 0.00497 | 0.0773 |
| 57 | 2  | 1 | 0.0098 | 0.00976 | 0.00139 | 0.0689 |
| 58 | 1  | 1 | 0      | NaN     | NA      | NA     |

**Table S216.** Usak station Kaplan-Meier survival estimates according to SPEI-12

| Kaplan-Meier Wet to Dry (SPEI12) |        |         |          |         |              |              |
|----------------------------------|--------|---------|----------|---------|--------------|--------------|
|                                  |        | n       | events   | median  | 0.95LCL      | 0.95UCL      |
|                                  |        | 107     | 107      | 18      | 16           | 2            |
| time                             | n.risk | n.event | survival | std.err | lower 95% CI | upper 95% CI |
| 1                                | 107    | 6       | 0.9439   | 0.0222  | 0.90132      | 0.9885       |
| 2                                | 101    | 5       | 0.8972   | 0.0294  | 0.84146      | 0.9566       |
| 3                                | 96     | 4       | 0.8598   | 0.0336  | 0.79648      | 0.9282       |
| 4                                | 92     | 2       | 0.8411   | 0.0353  | 0.77463      | 0.9133       |
| 5                                | 90     | 3       | 0.8131   | 0.0377  | 0.74247      | 0.8904       |
| 6                                | 87     | 1       | 0.8037   | 0.0384  | 0.7319       | 0.8826       |
| 7                                | 86     | 2       | 0.785    | 0.0397  | 0.71095      | 0.8669       |
| 8                                | 84     | 2       | 0.7664   | 0.0409  | 0.69023      | 0.8509       |
| 9                                | 82     | 2       | 0.7477   | 0.042   | 0.66973      | 0.8347       |
| 10                               | 80     | 2       | 0.729    | 0.043   | 0.64943      | 0.8183       |
| 11                               | 78     | 3       | 0.7009   | 0.0443  | 0.61934      | 0.7933       |
| 12                               | 75     | 3       | 0.6729   | 0.0454  | 0.58962      | 0.7679       |
| 13                               | 72     | 3       | 0.6449   | 0.0463  | 0.56027      | 0.7422       |
| 14                               | 69     | 2       | 0.6262   | 0.0468  | 0.54089      | 0.7249       |
| 15                               | 67     | 3       | 0.5981   | 0.0474  | 0.51209      | 0.6986       |
| 16                               | 64     | 4       | 0.5607   | 0.048   | 0.47417      | 0.6631       |
| 17                               | 60     | 4       | 0.5234   | 0.0483  | 0.43679      | 0.6271       |
| 18                               | 56     | 5       | 0.4766   | 0.0483  | 0.3908       | 0.5813       |
| 19                               | 51     | 4       | 0.4393   | 0.048   | 0.3546       | 0.5441       |
| 20                               | 47     | 4       | 0.4019   | 0.0474  | 0.31893      | 0.5064       |
| 21                               | 43     | 4       | 0.3645   | 0.0465  | 0.28381      | 0.4681       |
| 22                               | 39     | 2       | 0.3458   | 0.046   | 0.26646      | 0.4487       |
| 23                               | 37     | 2       | 0.3271   | 0.0454  | 0.24926      | 0.4292       |
| 24                               | 35     | 2       | 0.3084   | 0.0446  | 0.23222      | 0.4096       |
| 25                               | 33     | 2       | 0.2897   | 0.0439  | 0.21534      | 0.3898       |
| 26                               | 31     | 2       | 0.271    | 0.043   | 0.19864      | 0.3698       |
| 27                               | 29     | 2       | 0.2523   | 0.042   | 0.18211      | 0.3496       |

|    |    |   |        |        |         |        |
|----|----|---|--------|--------|---------|--------|
| 28 | 27 | 2 | 0.2336 | 0.0409 | 0.16578 | 0.3293 |
| 29 | 25 | 1 | 0.2243 | 0.0403 | 0.15769 | 0.319  |
| 30 | 24 | 1 | 0.215  | 0.0397 | 0.14965 | 0.3087 |
| 41 | 23 | 1 | 0.2056 | 0.0391 | 0.14167 | 0.2984 |
| 42 | 22 | 1 | 0.1963 | 0.0384 | 0.13376 | 0.288  |
| 43 | 21 | 1 | 0.1869 | 0.0377 | 0.1259  | 0.2775 |
| 44 | 20 | 1 | 0.1776 | 0.0369 | 0.11811 | 0.267  |
| 45 | 19 | 2 | 0.1589 | 0.0353 | 0.10274 | 0.2457 |
| 46 | 17 | 2 | 0.1402 | 0.0336 | 0.08768 | 0.2241 |
| 47 | 15 | 2 | 0.1215 | 0.0316 | 0.07299 | 0.2022 |
| 48 | 13 | 2 | 0.1028 | 0.0294 | 0.05874 | 0.1799 |
| 49 | 11 | 2 | 0.0841 | 0.0268 | 0.04501 | 0.1572 |
| 58 | 9  | 1 | 0.0748 | 0.0254 | 0.03839 | 0.1456 |
| 72 | 8  | 1 | 0.0654 | 0.0239 | 0.03197 | 0.1339 |
| 73 | 7  | 1 | 0.0561 | 0.0222 | 0.02577 | 0.122  |
| 74 | 6  | 2 | 0.0374 | 0.0183 | 0.01429 | 0.0978 |
| 75 | 4  | 2 | 0.0187 | 0.0131 | 0.00474 | 0.0738 |
| 76 | 2  | 2 | 0      | NaN    | NA      | NA     |

**Table S217.** Usak station Kaplan-Meier drought risk estimates according to SPEI-3, 6, and 12

| Drought Risk (SPEI3) |              | Drought Risk (SPEI6) |              | Drought Risk (SPEI12) |              |
|----------------------|--------------|----------------------|--------------|-----------------------|--------------|
| Time                 | Drought Risk | Time                 | Drought Risk | Time                  | Drought Risk |
| 1                    | 0.0784       | 1                    | 0.0686       | 1                     | 0.0561       |
| 2                    | 0.1275       | 2                    | 0.1373       | 2                     | 0.1028       |
| 3                    | 0.2059       | 3                    | 0.1961       | 3                     | 0.1402       |
| 4                    | 0.2647       | 4                    | 0.2549       | 4                     | 0.1589       |
| 5                    | 0.3431       | 5                    | 0.3039       | 5                     | 0.1869       |
| 6                    | 0.4216       | 6                    | 0.3431       | 6                     | 0.1963       |
| 7                    | 0.4804       | 7                    | 0.4216       | 7                     | 0.215        |
| 8                    | 0.5196       | 8                    | 0.451        | 8                     | 0.2336       |
| 9                    | 0.5784       | 9                    | 0.4902       | 9                     | 0.2523       |
| 10                   | 0.5882       | 10                   | 0.5196       | 10                    | 0.271        |
| 11                   | 0.598        | 11                   | 0.5294       | 11                    | 0.2991       |
| 12                   | 0.6078       | 12                   | 0.549        | 12                    | 0.3271       |
| 13                   | 0.6373       | 13                   | 0.5882       | 13                    | 0.3551       |
| 14                   | 0.6863       | 14                   | 0.6373       | 14                    | 0.3738       |
| 15                   | 0.7255       | 15                   | 0.6765       | 15                    | 0.4019       |

|    |        |    |        |    |        |
|----|--------|----|--------|----|--------|
| 16 | 0.7745 | 16 | 0.7157 | 16 | 0.4393 |
| 17 | 0.8333 | 17 | 0.7549 | 17 | 0.4766 |
| 18 | 0.8824 | 18 | 0.7745 | 18 | 0.5234 |
| 19 | 0.9412 | 19 | 0.7843 | 19 | 0.5607 |
| 20 | 0.9608 | 20 | 0.7941 | 20 | 0.5981 |
| 21 | 0.9706 | 22 | 0.8039 | 21 | 0.6355 |
| 24 | 0.9804 | 23 | 0.8137 | 22 | 0.6542 |
| 37 | 0.9902 | 24 | 0.8235 | 23 | 0.6729 |
| 48 | 1      | 25 | 0.8333 | 24 | 0.6916 |
|    |        | 26 | 0.8627 | 25 | 0.7103 |
|    |        | 27 | 0.8725 | 26 | 0.729  |
|    |        | 28 | 0.8824 | 27 | 0.7477 |
|    |        | 30 | 0.8922 | 28 | 0.7664 |
|    |        | 39 | 0.902  | 29 | 0.7757 |
|    |        | 40 | 0.9118 | 30 | 0.785  |
|    |        | 41 | 0.9216 | 41 | 0.7944 |
|    |        | 42 | 0.9314 | 42 | 0.8037 |
|    |        | 43 | 0.9412 | 43 | 0.8131 |
|    |        | 44 | 0.951  | 44 | 0.8224 |
|    |        | 45 | 0.9608 | 45 | 0.8411 |
|    |        | 46 | 0.9706 | 46 | 0.8598 |
|    |        | 53 | 0.9804 | 47 | 0.8785 |
|    |        | 57 | 0.9902 | 48 | 0.8972 |
|    |        | 58 | 1      | 49 | 0.9159 |
|    |        |    |        | 58 | 0.9252 |
|    |        |    |        | 72 | 0.9346 |
|    |        |    |        | 73 | 0.9439 |
|    |        |    |        | 74 | 0.9626 |
|    |        |    |        | 75 | 0.9813 |
|    |        |    |        | 76 | 1      |
